# Supplementary material for: RT-LAMP as Diagnostic Tool for Influenza—A Virus Detection in Swine
Source: Vet Sci. 2023 Mar 13;10(3):220. doi: 10.3390/vetsci10030220 (PMC10051247; doi:10.3390/vetsci10030220)
Supplement: Supplementary file 1 [file vetsci-10-00220-s001.zip]

Archive with 10 entries (10 files):
- Aligned Matrix swine 17-20.fa
- cell_culture_LAMP1.xlsx
- Fig 1 gBlock copies 3-6.png
- Fig 2A 3-6.png
- Fig 2b 3-6.png
- lamp_IAV_detection_swine_pig_samples1.csv
- ROC_data.xlsx
- Supplementary materials 3-6.docx
- Supplementary materials 3-6.pdf
- SwConM_conseq.fasta
