# Supplementary material for: RT-LAMP as Diagnostic Tool for Influenza—A Virus Detection in Swine
Source: Vet Sci. 2023 Mar 13;10(3):220. doi: 10.3390/vetsci10030220 (PMC10051247; doi:10.3390/vetsci10030220)
Supplement: Supplementary file 1 [file vetsci-10-00220-s001.zip › Aligned Matrix swine 17-20.fa]

>A/swine/Kansas/A01378019/2017/1-1027
AGCAAAAGCAGGTAGATATTTAAAGATGAGTCTTCTAACCGAGGTCGAAACGTACGTTCTTTCTATCATCCC
GTCAGGCCCCCTCAAAGCCGAGATCGCGCAGAGACTGGAAAGTGTATTTGCAGGAAAGAACACAGATCTTGA
GGCTCTCATGGAATGGCTAAAGACAAGACCAATCTTGTCACCTCTGACTAAGGGAATTTTAGGATTTGTGTT
CACGCTCACCGTGCCCAGTGAGCGAGGACTGCAGCGTAGACGCTTTGTCCAAAATGCCCTAAATGGGAATGG
GGACCCGAACAACATGGATAGAGCAGTTAAACTATACAAGAAGCTCAAAAGAGAAATAACGTTCCATGGGGC
TAAGGAGGTGTCACTAAGCTATTCAACTGGTGCACTTGCCAGTTGCATGGGCCTCATATACAACAGGATGGG
AACAGTGACCACAGAAGCTGCTTTTGGTCTGGTGTGTGCCACTTGTGAACAGATTGCTGATTCACAGCATCG
ATCTCACAGACAAATGGTTACTACCACCAATCCACTAATCAGGCATGAAAACAGAATGGTGCTGGCTAGCAC
TACTGCAAAGGCTATGGAACAAATGGCTGGATCGAGTGAACAGGCAGCAGAGGCCATGGAGGTTGCTAATCA
GACTAGGCAGATGGTACATGCAATGAGAACTATTGGGACTCATCCTAGCTCCAGTGCTGGTCTGAAGGATGA
CCTTCTTGAAAATTTACAGGCCTACCAGAAGCGAATGGGAGTGCAAATGCAGCGATTCAAGTGATCCTCTCG
TCATTGCAGCAAATATCATTGGGATCTTGCACCTGATATTGTGGATTACTGATCGTCTTTTTTTCAAATGTA
TTTATCGTCGCTTTAAATACGGTTTGAAAAGAGGGCCTCCTACAGAAGGAGTGCCTGAGTCCATGAGGGAAG
AATATCAACAGGAACAGCAGAGTGCTGTGGATGTTGACGATGGTCATTTTGTCAACATAGAGCTAGAGTAAA
AAACTACCTTGTTTCTACT
>A/swine/Kansas/A01378020/2017/1-982
-------------------------ATGAGTCTTCTAACCGAGGTCGAAACGTACGTTCTTTCTATCATCCC
GTCAGGCCCCCTCAAAGCCGAGATCGCGCAGAGACTGGAGAGTGTCTTTGCAGGAAAGAACACAGATCTTGA
GGCTCTCATGGAATGGCTAAAGACAAGACCAATCTTGTCACCTTTGACTAAGGGAATTTTAGGATTTGTGTT
CACGCTCACCGTGCCCAGTGAGCGAGGACTTCAGCGTAGACGCTTTGTCCAAAATGCCCTAAATGGGAATGG
GGACCCAAACAACATGGATAGAGCAGTCAAACTATACAAGAAGCTCAAAAGAGAAATAACGTTCCATGGGGC
CAAAGAGGTGTCACTAAGCTATTCAACTGGTGCACTTGCCAGTTGCATGGGCCTCATATATAACAGGATGGG
AACAGTAACCACAGAAGCTGCTTTTGGTCTAGTATGTGCCACTTGTGAACAGATTGCTGATTCACAGCATCG
GTCTCACAGACAAATGGTTACTACCACCAATCCACTAATCAGGCATGAAAACAGAATGGTGCTGGCTAGCAC
TACGGCAAAGGCTATGGAACAGATGGCTGGATCGAGTGAACAGGCAGCAGAGGCCATGGAGGTTGCTAATCA
GACTAGGCAGATGGTACATGCAATGAGGACTATTGGGACTCATCCTAGCTCCAGTGCTGGTCTGAAAGATGA
CCTTCTTGAAAATTTGCAGGCCTACCAGAAACGAATGGGAGTGCAGATGCAGCGATTCAAGTGATCCTCTCG
TCATTGCAGCAAATATCATTGGGATCTTGCACCTGATATTGTGGATTGCAGATCGTCTTTTTTTCAAATGCA
TTTATCGTCGCTTTAAATACGGGTTGAAAAGAGGGCCTTCTACGGAAGGAGTGCCTGAGTCCATGAGGGAAG
AATATCAACAGGAACAGCAGAGTGCGGTGGATGTTGACGATGGTCATTTTGTCAACATAGAGCTAGAGTAA-
-------------------
>A/swine/Michigan/A01259076/2017/1-982
-------------------------ATGAGTCTTCTAACCGAGGTCGAAACGTACGTTCTTTCTATCATCCC
GTCAGGCCCCCTCAAAGCCGAGATCGCGCAGAGACTGGAAAGTGTATTTGCAGGAAAGAACACAGATCTTGA
GGCTCTCATGGAATGGCTAAAGACAAGACCAATCTTGTCACCTCTGACTAAGGGAATTTTAGGATTTGTGTT
CACGCTCACCGTGCCCAGTGAGCGAGGACTGCAGCGTAGACGCTTTGTCCAAAATGCCCTAAATGGGAATGG
GGACCCGAACAACATGGATAGAGCAGTTAAACTATACAAGAAGCTCAAAAGAGAAATAACGTTCCATGGGGC
TAAGGAGGTGTCACTAAGCTATTCAACTGGTGCACTTGCCAGTTGCATGGGCCTCATATACAACAGGATGGG
AACAGTGACCACAGAAGCTGCTTTTGGTCTAGTGTGTGCCACTTGTGAACAGATTGCTGATTCACAGCATCG
ATCTCACAGACAAATGGTTGCTACCACCAATCCACTAATCAGGCATGAAAACAGAATGGTGCTGGCTAGCAC
TACTGCAAAGGCTATGGAACAGATGGCTGGATCGAGTGAACAGGCAGCAGAGGCCATGGAGGTTGCTAATCA
GACTAGGCAGATGGTACATGCAATGAGAACTATTGGGACTCATCCTAGCTCCAGTGCTGGTCTGAAGGATGA
CCTTCTTGAAAATTTACAGGCCTACCAGAAGCGAATGGGAGTGCAAATGCAGCGATTCAAGTGATCCTCTCG
TCATTGCAGCAAATATCATTGGGATCTTGCACCTGATATTGTGGATTACTGATCGTCTTTTTTTCAAATGTA
TTTATCGTCGCTTTAAATACGGTTTGAAAAGAGGGCCTCCTACAGAAGGAGTGCCTGAGTCCATGAGGGAAG
AATATCAACAGGAACAGCAGAGTGCTGTGGATGTTGACGATGGTCATTTTGTCAACATAGAGCTAGAGTAA-
-------------------
>A/swine/Kansas/A01378027/2017/1-1026
AGCAAAAGCAGGTAGATATTTAAAGATGAGTCTTCTAACCGAGGTCGAAACGTACGTTCTTTCTATCATCCC
GTCAGGCCCCCTCAAAGCCGAGATCGCGCAGAGACTGGAAAGTGTCTTTGCAGGAAAAAACACAGATCTTGA
GGCTCTCATGGAATGGCTAAAGACAAGACCAATCTTGTCACCTTTGACCAAGGGCATTTTAGGATTTGTGTT
CACGCTCACCGTGCCCAGCGAGCGAGGACTGAATCGTAGACGCTTTGTCCAAAATGCCCTAAATGGGAATGG
GGACCCAAACAACATGGATAGAGCAGTTAAACTATACAAGAAGCTCAAAAGAGAAATAACGTTCCATGGGGC
CAAGGAGGTGTCACTAAGCTATTCAACTGGTGCACTTGCCAGTTGCATGGGCCTCATATACAACAGGATGGG
AACAGTAACCACAGAAGCTGCTTTTGGTTTAGTATGTGCCACTTGTGAACAGATCGCTGATTCACAGCATCG
GTCTCACAGACAAATGGCCACTACCACCAATCCACTAATCAGGCATGAAAACAGAATGGTGCTGGCTAGCAC
TACGGCAAAGGCCATGGAACAGATGGCTGGATCGAGTGAACAGGCAGCAGAGGCCATGGAGGTTGCTAATCA
GACTAGGCAGATGGTACATGCAATGAGAACTATTGGGACTCATCCTAGCTCCAGTGCTGGTCTGAAAGATGA
CCTTCTTGAAAATTTGCAGGCCTACCAGAAACGAATGGGAGTGCAGATGCAGCGATTCAAGTGATCCTCTCG
TCATTGCAGCAAATATCATTGGGATCTTGCACCTGATATTGTGGATTACAGATCGTCTTTTTTTCAAATGCA
TTTATCGTCGCTTTAAATACGGGTTGAAAAGAGGGCCTTCTACGGAAGGAGTGCCTGAGTCCATGAGGGAAG
AATATCAACAGGAACAGCAGAGTGCGGTGGATGTTGACGATGGTCATTTTGTCAACATAGAGCTAGAGTAAA
AAACTACCTTGTTTCTAC-
>A/swine/Illinois/A01672343/2017/1-982
-------------------------ATGAGTCTTCTAACCGAGGTCGAAACGTACGTTCTTTCTATCATCCC
GTCAGGCCCCCTCAAAGCCGAGATCGCGCAGAGACTGGAAAGTGTATTTGCAGGAAAGAACACAGATCTTGA
GGCTCTCATGGAATGGCTAAAGACAAGACCAATCTTGTCACCTCTGACTAAGGGAATTTTAGGATTTGTGTT
CACGCTCACCGTGCCCAGTGAGCGAGGACTGCAGCGTAGACGCTTTGTCCAAAATGCCCTAAATGGGAATGG
GGACCCGAACAACATGGATAGAGCAGTTAAACTATACAAGAAGCTCAAAAGAGAAATAACGTTCCATGGGGC
TAAGGAGGTGTCACTAAGCTATTCAACTGGTGCACTTGCCAGTTGCATGGGCCTCATATACAACAGGATGGG
AACAGTGACCACAGAAGCTGCTTTTGGTCTAGTGTGTGCCACTTGTGAACAGATTGCTGATTCACAGCATCG
ATCTCACAGACAAATGGTTACTACCACCAATCCGCTAATCAGGCATGAAAACAGAATGGTGCTGGCTAGCAC
TACTGCAAAGGCTATGGAACAGATGGCTGGATCGAGTGAACAGGCAGCAGAGGCCATGGAGGTTGCTAATCA
GACTAGGCAGATGGTACATGCAATGAGAACTATTGGGACTCATCCTAGCTCCAGTGCTGGTCTGAAGGATGA
CCTTCTTGAAAATTTACAGGCCTACCAGAAGCGAATGGGAGTGCAAATGCAGCGATTCAAATGATCCTCTCG
TCATTGCAGCAAATATCATTGGGATCTTGCACCTGATATTGTGGATTACTGATCGTCTTTTTTTCAAATGTA
TTTATCGTCGCTTTAAATACGGTTTGAAAAGAGGGCCTCCTACAGAAGGAGTTCCTGAGTCCATGAGGGAAG
AATATCAACAGGAACAGCAGAGTGCTGTGGATGTTGACGATGGTCATTTTGTCAACATAGAGCTAGAGTAA-
-------------------
>A/swine/Missouri/A01672030/2017/1-982
-------------------------ATGAGTCTTCTAACCGAGGTCGAAACGTACGTCCTTTCTATCATACC
GTCAGGCCCCCTCAAAGCCGAGATCGCGCAGAGACTGGAAAGTGTCTTTGCAGGAAAGAACACAGATCTTGA
GGCTCTCATGGAATGGCTAAAGACAAGACCAATCTTGTCACCTCTGACTAAAGGAATTTTAGGGTTTGTGTT
CACGCTCACCGTGCCCAGTGAGCGAGGACTGCAGCGTAGACGCTTTGTCCAAAATGCCCTAAATGGGAATGG
GGACCCAAACAACATGGATAGAGCAGTCAAACTATACAAGAAGCTCAAAAGAGAAATAACGTTCCATGGGGC
CAAGGAGGTGTCACTAAGCTATTCAACTGGTGCACTTGCCAGTTGCATGGGCCTCATATACAACAGGATGGG
AGCAGTGACCACTGAAGCTGCATTTGGTCTAGTGTGTGCCACTTGTGAACAGATTGCTGATTCTCAGCATCG
GTCTCACAGACAGATGGCTACTACCACCAATCCACTAATCAGGCATGAGAACAGAATGGTGCTAGCTAGCAC
TACGGCAAAGGCTATGGAACAGATGGCTGGATCGAGTGAACAGGCAGCGGAGGCCATGGAGGTTGCTAATCA
GACTAGGCAGATGGTACATGCAATGAGAACTATTGGGACTCATCCTAGCTCTAGTACTGGTCTGAAAGATGA
CCTTCTTGAAAATTTGCAGGCCTACCAGAAGCGAATGGGAGTGCAGATGCAGCGGTTCAAGTGATCCTCTCG
CCATTGCAGCAAATATCATTGGGATCTTGCACCTGATATTGTGGATTACTGATCGTCTTTTTTTCAAATGTA
TTTATCGTCGCTTTAAATACGGTTTGAAAAGAGGGCCTTCTACGGAAGGAGTGCCTGAGTCCATGAGGGAAG
AATATCAACAGGAACAGCAGAATGCTGTGGATGTTGACGATGGTCATTTTGTCAACATAGAGCTAGAGTAA-
-------------------
>A/swine/Oklahoma/A01672422/2017/1-982
-------------------------ATGAGTCTTCTGACCGAGGTCGAAACGTACGTTCTTTCTATCATCCC
GTCAGGCCCCCTCAAAGCCGAGATCGCACAGAGACTGGAAAGTGTCTTTGCAGGAAAGAACACAGATCTTGA
GGCCCTCATGGAATGGCTAAAGACAAGACCAATCTTGTCACCTCTGACTAAGGGGATTTTAGGATTTGTGTT
CACGCTCACCGTGCCCAGTGAGCGAGGACTGCAGCGTAGACGCTTTGTCCAAAATGCCCTAAATGGAAATGG
GGACCCGAACAACATGGATAGAGCAGTTAAGCTATACAAGAAGCTCAAAAGAGAAATAACATTCCATGGGGC
CAAGGAGGTGTCACTAAGCTATTCAACTGGTGCACTTGCCAGTTGCATGGGCCTCATATACAACAGGATGGG
AACAGTAACCACAGAAGCTGCTTTTGGTCTAGTGTGTGCCACTTGTGAACAGATTGCTGATTCACAGCATAG
GTCTCACAGACAAATGGCTACTACCACCAATCCACTGATCAGGCATGAAAACAGGATGGTGCTGGCTAGCAC
TACGGCAAAGGCTATGGAACAGATGGCTGGATCGAGTGAGCAGGCAGCAGAGGCCATGGAGGTTGCTAATAA
GACTAGGCAGATGGTACATGCAATGAGAACTATTGGGACTCATCCTAGCTCCAGTGCTGGTCTGAAAGATGA
TCTTCTTGAAAATTTGCAGGCCTACCAGAAGCGAATGGGAGTGCAAATGCAGCGATTCAAATGATCCTCTCG
TCATTGCAGCAAATATCATTGGGATCTTGCACCTGATATTGTGGATTTCTGATCGTCTTTTTTTCAAATGTG
TTTATCGTCACTTTAAATACGGTTTGAAAAGAGGGCCTTCTACAGAAGGAGTGCCTGAGTCCATGAGGGAAG
AATATCAACAGGAACAGCAGAGTTCTGTGGATGTTGACGATGGTCATTTTGTCAACATAGAGCTAGAGTAA-
-------------------
>A/swine/Iowa/A01672415/2017/1-982
-------------------------ATGAGTCTTCTAACCGAGGTCGAAACGTACGTTCTTTCTATCATCCC
GTCAGGCCCCCTCAAAGCCGAGATCGCGCAGAGACTGGAAAGTGTATTTGCAGGAAAGAACACAGATCTTGA
GGCTCTCATGGAATGGCTAAAGACAAGACCAATCTTGTCACCTCTGACTAAGGGAATTTTAGGATTTGTGTT
CACGCTCACCGTGCCCAGTGAGCGAGGACTGCAGCGTAGACGCTTTGTCCAAAATGCCCTAAATGGGAATGG
GGACCCGAACAACATGGATAGAGCAGTTAAACTATACAAGAAGCTCAAAAGAGAAATAACGTTCCATGGGGC
TAAGGAGGTGTCACTAAGCTATTCAACTGGTGCACTTGCCAGTTGCATGGGCCTCATATACAACAGGATGGG
AACAGTGACCACAGAAGCTGCTTTTGGTCTAGTGTGTGCCACTTGTGAACAGATTGCTGATTCACAGCATCG
ATCTCACAGACAAATGGTTACTACCACCAATCCACTAATCAGGCATGAAAACAGAATGGTGCTGGCTAGCAC
TACTGCAAAGGCTATGGAACAGATGGCTGGATCGAGTGAACAGGCAGCAGAGGCCATGGAGGTTGCTAATCA
GACTAGGCAGATGGTACATGCAATGAGAACTATTGGGACTCATCCTAGCTCCAGTGCTGGTCTGAAGGATGA
CCTTCTTGAAAATTTACAGGCCTACCAGAAGCGAATGGGAGTGCAAATGCAGCGATTCAAATGATCCTCTCG
TCATTGCAGCAAATATCATTGGGATCTTGCACCTGATATTGTGGATTACTGATCGTCTTTTTTTCAAATGTA
TTTATCGTCGCTTTAAATACGGTTTGAAAAGAGGGCCTCCTACAGAAGGAGTTCCTGAGTCCATGAGGGAAG
AATATCAACAGGAACAGCAGAGTGCTGTGGATGTTGACGATGGTCATTTTGTCAACATAGAGCTAGAGTAA-
-------------------
>A/swine/North_Carolina/A01672048/2017/1-982
-------------------------ATGAGTCTTCTAACCGAGGTCGAAACGTACGTTTTGTCTATCATTCC
GTCAGGCCCCCTCAAAGCCGAGATCGCGCAGAGACTGGAAAGTGTCTTTGCAGGAAAGAACACAGATCTTGA
GGCTCTCATGGAATGGCTAAAGACAAGACCAATCTTGTCACCTCTGACTAAGGGAATTTTAGGATTTGTGTT
CACGCTCACCGTGCCCAGTGAGCGAGGACTGCAGCGTAGACGCTTTGTCCAAAATGCCCTGAATGGAAATGG
GGACCCAAACAACATGGATAGAGCAGTTAAACTATACAAGAAGCTCAAAAGAGAAATAACGTTCCATGGGGC
AAAGGAGGTGTCACTTAGCTATTCAACTGGTGCACTTGCCAGTTGCATGGGCCTCATATACAACAGGATGGG
AACAGTGACCACAGAAGCTGCTTTTGGTCTAGTGTGTGCCACTTGTGAACAGATTGCTGATTCACAGCATCG
GTCTCACAGACAGATGGTTACTACCACCAATCCACTAATCAGGCATGAGAACAGAATGGTGCTGGCTAGCAC
TACAGCAAAGGCCATGGAACAGATGGCTGGATCGAGTGAACAGGCAGCGGAGGCCATGGAGGTTGCTAATCA
GACTAGGCAGATGGTACATGCAATGAGAACTATTGGGACTCATCCTAGCTCCAGTACTGGTCTGAAAGATGA
CCTTCTTGAAAATTTGCAGGCCTACCAGAAGCGAATGGGAGTGCAGATGCAGCGATTCAAGTGATCCTCTCG
CCATTGCAGCCAATATCATTGGGATCTTGCACCTGATATTGTGGATTACTGATCGTCTTTTTTTCAAATGCA
TTTATCGTCGCTTTAAATACGGTTTGAAAAGAGGGCCTTCTACGGAAGGAGTGCCTGAGTCCATGAGGGAAG
AATATCAACAGGAACAGCAGAGTGCTGTGGATGTTGACGATGGTCATTTTGTCAACATAGAGCTAGAGTAA-
-------------------
>A/swine/Indiana/A01672517/2017/1-982
-------------------------ATGAGTCTTCTAACCGAGGTCGAAACGTACGTTCTTTCTATCATACC
GTCAGGCCCCCTCAAAGCCGAGATCGCACAGAGACTGGAAAGTGTCTTTGCAGGAAAGAACACAGACCTTGA
GGCTCTCATGGAATGGCTAAAGACAAGACCAATCTTGTCACCTCTGACTAAGGGAATTTTAGGATTTGTGTT
CACGCTCACCGTGCCCAGTGAGCGAGGACTGCAGCGTAGACGCTTTGTTCAAAATGCTCTGAATGGGAATGG
GGACCCAAACAACATGGATAGAGCAGTTAAACTATACAAGAAGCTCAAAAGAGAAATAACGTTCCATGGGGC
CAAGGAGGTGTCACTAAGCTATTCAACTGGTGCACTTGCCAGTTGCATGGGCCTCATATACAACAGGATGGG
AACAGTAACTACAGAAGCTGCTTTTGGTCTAGTGTGTGCCACTTGTGAACAGATTGCTGATTCACAGCATCG
GTCTCACAGACAAATGGCGACAACCACCAATCCACTAATCAGGCATGAGAACAGAATGGTGCTGGCTAGCAC
TACGGCAAAGGCTATGGAACAGATGGCTGGATCGAGTGAACAGGCAGCAGAGGCCATGGAGGTTGCTAATCA
GACTAGGCAGATGGTACATGCAATGAGAACTATTGGGACTCATCCTAGCTCCAGTAATGGTCTGAAAGATGA
CCTTCTTGAAAATTTGCAGGCTTACCAGAAACGAATGGGAGTGCAGATGCAGCGATTCAAGTGATCCTCTCG
CCATTGCAGCAAATATCATTGGGATCTTGCACCTGATATTGTGGATTACTGATCGTCTTTTTTTCAAATGTA
TTTATCGTCGCTTTAAATACGGTTTGAAAGGAGGGCCTTCTACGGAAGGAGTGCCTAAGTCCATGAGGGAAG
AGTATCAACAGGAACAGCAGAGTGCTGTGGATGTTGACGATGGTCATTTTGTCAACATAGAGCTAGAGTAA-
-------------------
>A/swine/Kansas/A01378025/2017/1-1021
AGCAAAAGCAGGTAGATGTTTAAAGATGAGTCTTCTAACCGAGGTCGAAACGTACGTTCTTTCTATCGTCCC
GTCAGGCCCCCTCAAAGCCGAGATCGCGCAGAGACTGGAAAGTGTCTTTGCAGGAAAGAACACAGATCTTGA
GGCTCTAATGGAATGGCTAAAGACAAGACCAATCTTGTCACCTCTGACTAAGGGAATTTTAGGGTTTGTGTT
CACGCTCACCGTGCCCAGTGAGCGAGGACTGCAGCGTAGACGCTTTGTCCAAAATGCCCTAAATGGGAATGG
GGACCCGAACAACATGGATAGAGCAGTTAAACTATACAAGAAGCTCAAAAGAGAAATAACGTTCCATGGGGC
CAAGGAGGTGTCGCTAAGCTATTCAACTGGTGCACTTGCCAGTTGCATGGGCCTCATATACAACAGGATGGG
AACAGTGACCACAGAAGCTGCTTTTGGCCTAGTGTGTGCCACTTGTGAACAGATTGCTGATTCACAGCATCG
GTCCCACAGACAAATGGTTACTACTACCAATCCATTAATCAGGCATGAAAACAGAATGGTCCTGGCTAGCAC
TACGGCAAAGGCTATGGAACAGATGGCTGGATCGAGTGAACAGGCAGCAGAGGCCATGGAGGTTGCTAATCA
GACTAGGCAGATGGTACATGCAATGAGAACTATTGGTACTCATCCTAGCTCCAGTGCTGGTCTGAAAGATGA
CCTCCTTGAAAATTTGCAGGCCTACCAGAAGCGAATGGGAGTGCAGATGCAGCGATTCAAGTGATACTCTCG
CCATTGCAGCAAATATCATTGGGATCTTGCACCTGATATTGTGGATTACTGATCGTCTTTTTTTCAAATGCA
TTTATCGTCGATTTAAATACGGTTTGAAAAGAGGGCCTTCTACGGAAGGAGTGCCTGAGTCCATGAGGGAAG
AATATCAACAGGAACAGCAGAGTGCTGTGGATGTTGACGATGGTCATTTTGTCAACATAGAGCTAGAGTAAA
AAACTACCTTGTT------
>A/swine/Minnesota/A01672344/2017/1-982
-------------------------ATGAGTCTTCTAACCGAGGTCGAAACGTACGTTCTTTCTATCATCCC
GTCAGGCTCCCTCAAAGCCGAGATCGCGCAGAGACTGGAAAGTGTTTTTTCAGGAAAGAACACAGATCTTGA
GGCTCTCATGGAATGGCTAAAGACAAGACCAATCTTGTCACCTCTGACCAAGGGGATTTTAGGATTTGTGTT
CACGCTCACCGTGCCCAGTGAGCGAGGACTGCAGCGTAGACGCTTTGTCCAAAATGCCCTAAATGGGAATGG
GGACCCGAACAACATGGATAGAGCAGTTAAACTATACAAGAAGCTCAAAAGAGAAATAACGTTCCATGGGGC
CAAGGAGGTGTCACTAAGCTATTCAACTGGTGCACTTGCCAGTTGCATGGGCCTCATATACAACAGGATGGG
AACAGTGACCACAGAAGCTGCTTTTGGTCTAGTGTGTGCCACTTGTGAACAGATTGCTGATTCACAGCATCG
GTCTCACAGACAAATGGCTACTACCACCAATCCACTAATCAGACATGAAAACAGAATGGTGCTAGCTAGCAC
TACGGCAAAGGCTATGGAACAGATGGCTGGATCGAGTGAACAGGCAGCAGAGGCCATGGAGGTTGCTAATCA
AACTAGGCAGATGGTACATGCAATGAGAACTATTGGGACTCATCCTAGCTCCAGTGCTGGTCTGAAAGATGA
CCTTCTTGAAAATTTGCAGGCCTACCAGAAGCGAATGGGAGTGCAGATGCAGCGATTCAAATGACCCTCTCG
TCATTGCAGCAAATATCATTGGGATCTTGCACCTGATATTGTGGATTACTGATCGTCTTTTTTTCAAATGTA
TTTATCGTCGCTTTAAATACGGTTTGAAAAGAGGGCCTTCTACGGAAGGAGTGCCTGAGTCCATGAGGGAAG
AATATCAACAGGAACAGCAGAGTGCTGTGGATGTTGACGATGGTCATTTTGTCAACATAGAGCTAGAGTAA-
-------------------
>A/swine/Iowa/A01672419/2017/1-982
-------------------------ATGAGTCTTCTAACCGAGGTCGAAACGTACGTTCTTTCTATAATACC
GTCAGGCCCCCTCAAAGCCGAGATCGCGCAGAGACTGGAGAGTGTCTTTGCAGGAAAGAACACAGATCTTGA
GGCTCTCATGGAATGGCTAAAGACAAGACCAATCTTGTCACCTCTGACTAAGGGAATTTTAGGATTTGTGTT
CACGCTCACCGTGCCCAGTGAGCGAGGACTGCAGCGTAGACGCTTTGTCCAAAATGCCCTGAATGGGAATGG
GGACCCAAACAACATGGATAGAGCAGTTAAATTATACAAGAAGCTCAAAAGAGAAATAACGTTCCATGGGGC
CAAGGAGGTGTCACTAAGCTATTCAACTGGTGCACTTGCCAGTTGCATGGGCCTCATATACAACAGAATGGG
AACAGTGACCACAGAAGCTGCTTTTGGTCTAGTGTGTGCCACTTGTGAACAGATTGCTGATTCACAGCATCG
GTCTCACAGACAGATGGCTACTACCACCAATCCACTAATCAGGCATGAGAACAGAATGGTGCTGGCTAGCAC
TACGGCAAAGGCTATGGAACAGATGGCTGGATCGAGTGAACAGGCAGCGGAGGCCATGGAGGTTGCTAATCA
GACTAGGCAGATGGTACATGCTATGAGAACTATTGGGACTCATCCTAGCTCCAGTAATGGTCTGAAAGATGA
CCTTCTTGAAAATTTGCAGGCCTACCAGAAGCGAATGGGAGTGCAGATGCAACGATTCAAGTGATCCTCTCG
CCGTTGCAGCAAACATCATTGGGATCTTGCACCTGATATTGTGGATTACTGATCGTCTTTTTTTCAAATGTA
TTTATCGTCGCTTTAAATACGGTTTGAAAAGAGGGCCTTCAACGGAAGGAGTGCCTGAGTCCATGAGGGAAG
AATATCAACAGGAGCAGCAGAGTGCTGTGGATGTTGACGATGGTCATTTTGTCAACATAGAGCTAGAGTAA-
-------------------
>A/swine/North_Carolina/A01671999/2017/1-982
-------------------------ATGAGTCTTCTAACCGAGGTCGAAACGTACGTTCTTTCTATAATACC
GTCAGGCCCCCTCAAAGCCGAGATCGCGCAGAGACTGGAGAGTGTCTTTGCAGGAAAGAACACAGATCTTGA
GGCTCTCATGGAATGGCTAAAGACAAGACCAATCTTGTCACCTCTGACTAAGGGAATTTTAGGATTTGTGTT
CACGCTCACCGTGCCCAGTGAGCGAGGACTGCAGCGTAGACGCTTTGTCCAAAATGCCCTGAATGGGAATGG
GGACCCAAACAACATGGATAGAGCAGTTAAATTATACAAGAAGCTCAAAAGAGAAATAACGTTCCATGGGGC
CAAGGAGGTGTCACTAAGCTATTCAACTGGTGCACTTGCCAGTTGCATGGGCCTCATATACAACAGAATGGG
GACAGTGACCACAGAAGCTGCTTTTGGTCTAGTGTGTGCCACTTGTGAACAGATTGCTGATTCACAGCATCG
GTCTCACAGACAGATGGCTACTACCACCAATCCACTAATCAGGCATGAGAACAGAATGGTGCTGGCTAGCAC
TACGGCAAAGGCTATGGAACAGATGGCTGGATCGAGTGAACAGGCAGCGGAGGCCATGGAGGTTGCTAATCA
GACTAGGCAGATGGTACATGCTATGAGAACTATTGGGACTCATCCTAGCTCCAGTAATGGTCTGAAAGATGA
CCTTCTTGAAAATTTGCAGGCCTACCAGAAGCGAATGGGAGTGCAGATGCAACGATTCAAGTGATCCTCTCG
CCGTTGCAGCAAACATCATTGGGATCTTGCACCTGATATTGTGGATTACTGATCGTCTTTTTTTCAAATGTA
TTTATCGTCGCTTTAAATACGGTTTGAAAAGAGGGCCTTCAACGGAAGGAGTGCCTGAGTCCATGAGGGAAG
AATATCAACAGGAGCAGCAGAGTGCTGTGGATGTTGACGATGGTCATTTTGTCAACATAGAGCTAGAGTAA-
-------------------
>A/swine/North_Carolina/A01672011/2017/1-982
-------------------------ATGAGTCTTCTAACCGAGGTCGAAACGTACGTTCTTTCTATCATACC
GTCAGGCCCCCTCAAAGCCGAGATCGCACAGAGACTGGAAAGTGTCTTTGCAGGAAAGAACACAGATCTTGA
GGCTCTCATGGAATGGCTAAAGACAAGACCAATCTTGTCACCTCTGACTAAGGGAATTTTAGGATTTGTGTT
CACGCTCACCGTGCCCAGTGAGCGAGGACTGCAGCGTAGACGCTTTGTCCAAAATGCTCTAAATGGGAATGG
GGACCCAAACAACATGGATAGAGCAGTTAAACTATACAAGAAGCTCAAAAGAGAAATAACGTTCCATGGGGC
CAAGGAGGTGTCACTAAGCTATTCAACAGGTGCACTTGCCAGTTGCATGGGCCTCATATACAACAGGATGGG
AACAGTGACCACAGAGGCTGCTTTTGGTCTAGTGTGTGCCACCTGTGAACAGATTGCTGATTCACAGCATAG
GTCTCACAGACAAATGGCTACTACCACCAATCCACTAATCAGGCATGAGAACAGAATGGTGCTGGCTAGCAC
TACGGCAAAGGCTATGGAACAGATGGCTGGATCGAGTGAACAGGCAGCGGAGGCCATGGAGGTTGCTAATCA
GACTAGGCAGATGGTACATGCAATGAGAACTATTGGGACTCATCCTAGCTCCAGTACTGGTCTGAAAGATGA
CCTTCTTGAAAATTTACAGGCCTACCAGAAGCGAATGGGAGTGCAGATGCAGCGATTCAAGTGATCCTCTCG
CCATTGCAGCAAATATCATTGGGATCTTGCACCTGATATTGTGGATTACTGATCGTCTTTTTTTCAAATGTA
TTTATCGTCGCTTTAAATACGGTTTGAAAAGAGGGCCTTCTACGGAAGGGGTGCCTGAGTCCATGAGGGAAG
AATATCAACAGGAACAGCAGAGTGCTGTGGATGTTGACGATGGTCATTTTGTCAACATAGAGCTAGAGTAA-
-------------------
>A/swine/Illinois/A01672615/2017/1-982
-------------------------ATGAGTCTTCTAACCGAGGTCGAAACGTACGTTCTTTCTATCATACC
GTCAGGCCCCCTCAAAGCCGAGATCGCGCAGAGACTGGAAAGTGTCTTTGCAGGAAAGAACACGGATCTTGA
GGTTCTCATGGAATGGCTAAAGACAAGACCAATCTTGTCACCTCTGACTAAGGGAATTTTAGGATTTGTGTT
CACGCTCACCGTGCCCAGTGAGCGAGGACTGCAGCGTAGACGCTTTGTCCAAAATGCCCTGAATGGGAATGG
GGACCCAAACAACATGGATAGAGCAGTTAAACTATACAAGAAGCTCAAAAGAGAAATAACGTTCCATGGGGC
CAAGGAGGTGTCACTTAGCTATTCAACTGGTGCACTTGCCAGTTGCATGGGCCTCATATACAACAGGATGGG
AACAGTGACCACAGAAGCTGCTTTTGGTCTAGTGTGTGCCACTTGTGAACAGATTGCTGATTCACAGCATCG
GTCTCACAGACAAATGGCTACAACCACCAATCCACTAATCAGGCATGAGAACAGAATGGTTCTGGCTAGCAC
TACGGCAAAGGCTATGGAACAGATGGCTGGGTCGAGTGAACAGGCAGCGGAGGCCATGGAGGTTGCTAATCA
GACTAGGCAGATGGTACATGCAATGAGAACTATTGGAACTCATCCTAGCTCCAGTACTGGTCTGAAAGATGA
CCTTCTTGAAAATTTGCAGGCCTACCAGAAGCGAATGGGAGTGCAGATGCAGCGATTCAAGTGATCCTCTCG
CCATTGCAGCAAATATCATTGGGATCTTGCACCTGACATTGTGGATTACTGATCGTCTTTTTTTCAAATGTA
TTTATCGTCGCTTTAAATACGGTTTGAAAAGAGGGCCTTCTACGGAAGGAGTGCCTGAGTCCATGAGGGAAG
AATATCAACAGGAACAGCAGAGTGCTGTGGATGTTGACGATGGTCATTTTGTCAACATAGAGCTAGAGTAA-
-------------------
>A/swine/Iowa/A01672518/2017/1-982
-------------------------ATGAGTCTTCTAACCGAGGTCGAAACGTACGTTCTTTCTATCATCCC
GTCAGGCCCCCTCAAAGCCGAGATCGCGCAGAGACTGGAGAGTGTCTTTGCAGGAAAGAACACAGATCTTGA
AGCTCTCATGGAATGGCTAAAGACAAGACCAATCTTGTCACCTTTGACTAAGGGAATTTTAGGATTTGTGTT
CACGCTCACCGTGCCCAGTGAGCGAGGACTGCAGCGTAGACGCTTTGTCCAAAATGCCCTAAATGGGAATGG
GGACCCAAACAACATGGATAGAGCAGTCAAACTATACAAGAAGCTCAAAAGAGAAATAACGTTCCATGGGGC
CAAGGAGGTGTCACTAAGCTATTCAACTGGTGCACTTGCCAGTTGCATGGGCCTCATATATAACAGGATGGG
GACAGTAACCACAGAAGCTGCTTTTGGTCTAGTATGTGCCACCTGTGAACAGATTGCTGATTCACAGCATCG
GTCTCACAGACAAATGGCTACCACCACCAATCCACTAATCAGGCATGAAAACAGAATGGTGCTGGCTAGCAC
TACGGCAAAGGCTATGGAACAGATGGCTGGATCGAGTGAACAGGCAGCAGAGGCCATGGAGGTTGCTAATCA
GACTAGGCAGATGGTACATGCAATGAGGACTATTGGGACTCATCCTAGCTCCAGTGCTGGTCTGAAAGATGA
CCTTCTTGAAAACTTGCAGGCCTACCAGAAACGAATGGGAGTGCAGATGCAGCGATTCAAGTGATCCTCTCG
TCATTGCAGCAAATATCATTGGGATCTTGCACCTGATATTGTGGATTACAGATCGTCTTTTTTTCAAATGCA
TTTATCGTCGCTTTAAATACGGGTTGAAAAGAGGGCCTTCTACGGAAGGAGTGCCTGAGTCCATGAGGGAAG
AATATCAACAGGAACAGCAGAGTGCGGTGGATGTTGACGATGGTCATTTTGTCAACATAGAGCTAGAGTAA-
-------------------
>A/swine/North_Carolina/A01672582/2017/1-982
-------------------------ATGAGTCTTCTAACCGAGGTCGAAACGTACGTTCTGTCTATCATTCC
GTCAGGCCCCCTCAAAGCCGAGATCGCGCAGAGACTGGAAAGTGTCTTTGCAGGAAAGAACACAGATCTTGA
GGCTCTCATGGAATGGCTAAAGACAAGGCCAATCTTGTCACCTCTAACTAAGGGAATTTTAGGATTTGTGTT
CACGCTCACCGTGCCCAGTGAGCGAGGACTGCAGCGTAGACGCTTTGTCCAAAATGCCCTGAATGGAAATGG
AGACCCAAACAACATGGATAGAGCAGTTAAACTATACAAGAAGCTCAAAAGAGAAATAACGTTCCATGGGGC
AAAGGAGGTGTCACTTAGCTATTCAACTGGTGCACTTGCCAGTTGCATGGGCCTCATATACAACAGGATGGG
AACAGTGACCACAGAAGCTGCTTTTGGTCTAGTGTGTGCCACTTGTGAACAGATTGCTGATTCACAGCATCG
GTCTCACAGACAGATGGCTACTACCACCAATCCACTAATCAGGCATGAGAACAGAATGGTGTTGGCTAGCAC
TACAGCAAAGGCTATGGAACAGATGGCTGGATCGAGTGAACAGGCCGCGGAGGCCATGGAGGTTGCTAATCA
GACTAGGCAGATGGTACATGCAATGAGAACTATTGGGACTCATCCTAGCTCCAGTACTGGTCTGAAAGATGA
CCTTCTTGAAAATTTGCAGGCCTACCAGAAGCGAATGGGAGTGCAGATGCAGCGATTCAAGTGATCCTCTCG
CCATTGCAGCCAATATCATTGGGATCTTGCACCTGATATTGTGGATTACTGATCGTCTTTTTTTCAAATGCA
TTTATCGTCGCTTTAAATACGGTTTGAAAAGAGGGCCTTCTACGGAAGGAGTGCCTGAGTCCATGAGGGAAG
AGTATCAACAGGAACAGCAGAGTGCTGTGGATGTTGACGATGGTCATTTTGTCAACATAGAGCTAGAGTAA-
-------------------
>A/swine/Indiana/A01672516/2017/1-982
-------------------------ATGAGTCTTCTAACCGAGGTCGAAACGTACGTTCTTTCTATCATACC
GTCAGGCCCCCTCAAAGCCGAGATCGCGCAGAGACTGGAAAGTGTCTTTGCAGGAAAGAATACAGACCTTGA
GGCTCTCATGGAATGGCTAAAGACAAGACCAATCTTGTCACCTTTGACTAAGGGAATTTTAGGATTTGTGTT
CACGCTCACCGTGCCCAGTGAGCGAGGACTGCAGCGTAGACGCTTTGTCCAAAATGCCCTGAATGGGAATGG
GGACCCAAACAACATGGATAGAGCAGTTAAACTATACAAGAAGCTCAAAAGAGAAATAACGTTCCATGGGGC
CAAGGAGGTGTCACTAAGCTATTCAACTGGTGCACTTGCCAGTTGCATGGGCCTCATATACAACAGGATGGG
AACAGTGACCACAGAAGCTGCTTTTGGTCTAGTGTGTGCCATTTGTGAACAGATTGCTGATTCACAGCATCG
GTCTCACAGACAGATGGCTACAACCACCAATCCACTAATCAGGCATGAGAACAGAATGGTGCTGGCTAGCAC
TACGGCAAAGGCTATGGAGCAGATGGCTGGATCAAGTGAACAGGCAGCGGAGGCCATGGAGGTTGCTAATCA
GACTAGGCAGATGGTACATGCAATGAGAACTATTGGGACTCATCCTAGTTCCAGTACTGGTCTGAAAGATGA
CCTTCTTGAAAATTTGCAGGCCTATCAGAAGCGAATGGGAGTGCAGATGCAGCGGTTTAAGTGATCCTCTCG
CCATTGCAGCAAATATCATTGGGATCCTGCACCTGATATTGTGGATTACTGATCGTCTTTTTTTCAAATGTA
TTTATCGTCGCTTTAAATACGGTTTGAAAAGAGGGCCTTCTACGGAAGGAGTGCCTGAGTCCATGAGGGAAG
AATATCAACAGGAACAGCAGAGTGCTGTGGATGTTGACGATGGTCATTTTGTCAACATAGAGCTGGAGTAA-
-------------------
>A/swine/Nebraska/A01672345/2017/1-982
-------------------------ATGAGTCTTCTAACCGAGGTCGAAACGTACGTTCTTTCTATCATCCC
GTCAGGCCCCCTCAAAGCCGAGATCGCGCAGAGACTGGAAAGTGTCTTTGCAGGAAAGAACACAGATCTTGA
GGCTCTCATGGAATGGCTAAAGACAAGACCAATCTTGTCACCTCTGACTAAGGGAATTTTAGGATTTGTGTT
CACGCTCACCGTGCCCAGTGAGCGAGGACTGCAGCGTAGACGCTTTGTCCAAAATGCCCTAAATGGGAATGG
GGACCCCAACAACATGGATAGAGCAGTTAAACTATACAAGAAGCTCAAAAGAGAAATAACGTTCCATGGGGC
TAAGGAGGTGTCACTAAGCTATTCAACTGGTGCACTTGCCAGTTGCATGGGCCTCATATACAACAGGATGGG
AACAGTGACCACAGAAGCTGCTTTTGGTCTAGTGTGTGCCACCTGTGAACAAATTGCTGATTCACAGCATCG
GTCTCACAGACAAATGGTTACAACCACCAATCCACTAATCAGGCATGAAAATAGAATGGTGCTGGCTAGCAC
TACTGCAAAGGCTATGGAACAGATGGCTGGATCGAGTGAACAGGCAGCAGAGGCCATGGAGGTTGCTAATCA
GACTAGGCAGATGGTACATGCAATGAGAACTATTGGGACTCATCCTAGCTCCAGTGCTGGTCTGAAAGATGA
CCTTCTTGAAAATTTACAGGCCTATCAGAAGCGAATGGGAGTGCAAATGCAGCGATTCAAGTGATCCTCTCG
TCATTGCAGCAAATATCATTGGGATCTTGCACTTGATATTGTGGATTACTGATCGTCTTTTTTTCAAATATA
TTTACCGTCGCTTTAAATACGGTTTGAAAAGAGGGCCTTCTACAGAAGGAGTGCCTGAGTCCATGAGGGAAG
AATATCAACAGGAACAGCAGAGTGCTGTGGATGTTGACGATGGTCATTTTGTCAACATAGAGCTAGAGTAA-
-------------------
>A/swine/Iowa/A01672046/2017/1-982
-------------------------ATGAGTCTTCTAACCGAGGTCGAAACGTACGTTCTTTCTATCATACC
GTCAGGCCCCCTCAAAGCCGAGATCGCGCAGAGACTGGAAAGTGTCTTTGCAGGAAAGAATACAGACCTTGA
GGCTCTCATGGAATGGCTAAAGACAAGACCAATCTTGTCACCTTTGACTAAGGGAATTTTGGGATTTGTGTT
CACGCTCACCGTGCCCAGTGAGCGAGGACTGCAGCGTAGACGCTTTGTCCAAAATGCCCTGAATGGGAATGG
GGACCCAAACAACATGGATAGAGCAGTTAAACTATACAAGAAGCTCAAAAGAGAAATAACGTTCCATGGGGC
CAAGGAGGTGTCACTAAGCTATTCAACTGGTGCACTTGCCAGTTGCATGGGCCTCATATACAACAGGATGGG
AACAGTGACCACAGAAGCTGCTTTTGGTCTAGTGTGTGCCACTTGTGAACAGATTGCTGATTCACAGCATCG
GTCTCACAGACAGATGGCTACAACCACCAATCCACTAATCAGGCATGAGAACAGAATGGTGCTGGCTAGCAC
TACGGCAAAGGCTATGGAACAGATGGCTGGATCGAGTGAACAGGCAGCGGAGGCCATGGAGGTTGCTAATCA
GACTAGGCAGATGGTACATGCAATGAGAACTATTGGGACTCATCCTAGTTCCAGTACTGGTCTGAAAGATGA
CCTTCTTGAAAATTTGCAGGCCTATCAGAAGCGAATGGGAGTGCAGATGCAGCGGTTTAAGTGATCCTCTCG
CCATTGCAGCAAATATCATTGGGATCTTGCACCTGATATTGTGGATTACTGATCGTCTTTTTTTCAAATGTA
TTTATCGTCGCTTTAAATACGGTTTGAAAAGAGGGCCTTCTACGGAAGGAGTGCCTGAGTCCATGAGGGAAG
AATATCAACAGGAACAGCAGAGTGCTGTGGATGTTGACGATGGTCATTTTGTCAACATAGAGCTGGAGTAA-
-------------------
>A/swine/Michigan/A01672424/2017/1-982
-------------------------ATGAGTCTTCTAACCGAGGTCGAAACGTACGTTCTTTCTATCATCCC
GTCAGGCCCCCTCAAAGCCGAGATCGCGCAGAGACTGGAAAGTGTCTTTGCAGGAAAGAACACAGATCTTGA
GGCTCTCATGGAATGGCTAAAGACAAGACCAATCTTGTCACCTTTGACTAAGGGAATTTTAGGATTTGTGTT
CACGCTCACCGTGCCCAGTGAGCGAGGACTGCAGCGTAGACGCTTTGTCCAAAATGCCTTAAATGGGAATGG
GGACCCAAACAACATGGATAGAGCAGTTAAACTATACAAGAAGCTCAAAAGAGAAATAACGTTCCATGGGGC
CAAGGAGGTGTCACTAAGCTATTCAACTGGTGCACTTGCCAGTTGCATGGGCCTCATATACAACAGGATGGG
AACAGTAACCACAGAAGCTGCTTTTGGTCTAGTGTGTGCCACTTGCGAGCAGATTGCTGATTCACAGCATCG
GTCTCACAGACAAATGGCTACTACCACCAATCCACTAATCAGGCATGAAAACAGAATGGTGCTGGCTAGCAC
TACGGCAAAGGCTATGGAACAGATGGCTGGATCGAGTGAACAGGCAGCAGAGGCCATGGAGGTTGCTAATCA
GACTAGGCAGATGGTACATGCAATGAGAACTATTGGGACTCATCCTAGCTCCAGTGCTGGTCTGAAAGATGA
CCTTCTTGAAAATTTGCAGGCCTACCAGAAACGAATGGGAGTGCAGATGCAGCGATTCAAGTGACCCTCTCG
TCATTGCAGCAAATATCATTGGGATCTTGCACCTGATATTGTGGATTACAGATCGTCTTTTTTTCAAATGCA
TTTATCGTCGCTTTAAATACGGGTTGAAAAGAGGGCCTTCTACGGAAGGAGTGCCTGAGTCCATGAGGGAAG
AATATCAACAGGAACAGCAGAGTGCGGTGGATGTTGACGATGGTCATTTTGTCAACATAGAGCTAGAGTAA-
-------------------
>A/swine/Nebraska/A01672049/2017/1-982
-------------------------ATGAGTCTTCTAACCGAGGTCGAAACGTACGTTCTTTCTATCATACC
GTCAGGCCCCCTCAAAGCCGAGATCGCACAGAGACTGGAAAGTGTTTTTGCAGGAAAGAACACAGATCTTGA
GGCTCTCATGGAATGGCTAAAGACAAGACCAATCTTGTCACCTCTGACTAAGGGAATTTTAGGGTTTGTGTT
CACGCTCACCGTGCCCAGTGAGCGAGGACTGCAGCGTAGACGCTTTGTCCAAAATGCCCTGAATGGGAATGG
GGACCCAAACAACATGGATAGAGCAGTTAAACTATACAAGAAGCTCAAAAGAGAAATAACGTTCCACGGGGC
CAAAGAGGTGTCACTAAGCTATTCAACTGGTGCACTTGCCAGTTGCATGGGCCTCATATACAACAGGATGGG
AACTGTGACTACAGAAGCTGCTTTTGGTCTAGTGTGTGCCACTTGTGAACAGATTGCTGATTCACAGCATCG
GTCTCACAGACAGATGGCTACAACCACCAATCCACTAATCAGGCATGAGAACAGAATGGTGCTAGCTAGCAC
CACGGCAAAGGCTATGGAACAGATGGCTGGATCGAGTGAACAGGCAGCGGAGGCCATGGAGGTTGCTAATCA
GACTAGGCAGATGGTACATGCAATGAGAACTATTGGGACTCATCCTAGCTCCAGTACAGGTCTGAAAGATGA
CCTTCTTGAAAATTTGCAGGCCTACCAGAAGCGAATGGGAGTGCAGATGCAGCGATTCAAGTGATCCTCTCG
CCATTGCAGCAAATATCATTGGGATCTTGCACCTGATATTGTGGATTGCTGATCGTCTTTTTTTCAAATGTA
TTTATCGTCGCTTTAAATACGGTTTGAAAAGAGGGCCTTCTACGGAAGGAGTGCCTGAGTCCATGAGGGAAG
AATATCAGCAGGAACAGCAGAGTGCTGTGGATGTTGACGATGGTCATTTTGTCAACATAGAGCTAGAGTAA-
-------------------
>A/swine/Iowa/A01672342/2017/1-982
-------------------------ATGAGTCTTCTAACCGAGGTCGAAACGTACGTTCTTTCTATCATCCC
GTCAGGCCCCCTCAAAGCCGAGATCGCGCAGAGACTGGAAAGTGTCTTTGCAGGAAAGAACACAGATCTTGA
GGCTCTCATGGAATGGTTAAAGACAAGACCAATCTTGTCACCTCTGACTAAGGGAATTTTAGGATTTGTGTT
CACGCTCACCGTGCCCAGTGAGCGAGGACTGCAGCGTAGACGCTTTGTCCAAAATGCCCTAAATGGGAATGG
GGACCCGAACAACATGGATAGAGCAGTTAAATTATACAAGAAGCTCAAAAGAGAAATAACGTTCCATGGGGC
TAAGGAAGTGTCACTAAGCTATTCAACTGGTGCACTTGCCAGTTGCATGGGCCTCATATACAACAGGATGGG
AACAGTGACCACAGAAGCTGCTTTTGGTCTAGTGTGTGCCACTTGTGAACAGATTGCTGATTCACAGCATCG
GTCTCACAGACAAATGGCTACTACCACCAATCCACTAATCAGGCATGAAAACAGAATGGTGCTGGCTAGCAC
TACTGCAAAGGCTATGGAACAGATGGCTGGATCGAGTGAACAGGCAGCAGAGGCCATGGAGGTTGCTAATCA
GACTAGGCAGATGGTACATGCAATGAGAACTATTGGGACTCATCCTAGCTCCAGTGCTGGTCTGAAAGATGA
CCTTCTTGAAAATTTACAGGCCTATCAGAAGCGAATGGGAGTGCAGATGCAGCGATTCAAGTGATCCTCTCG
CCATTGCCGCAAACATCATTGGGATCTTGCACCTGATATTGTGGATTACTGATCGTCTTTTTTTCAAATGTA
TTTATCGTCGCTTTAAATACGGTTTGAAAAGAGGGCCTTCTACAGAAGGAGTGCCTGAGTCCATGAGGGAAG
AATATCAGCAGGAACAGCAGAGTGCTGTGGATGTTGACGATGGTCATTTTGTCAACATAGAGCTAGAGTAA-
-------------------
>A/swine/Iowa/A01672042/2017/1-982
-------------------------ATGAGTCTTCTAACCGAGGTCGAAACGTACGTTCTTTCTGTCATACC
GTCAGGCCCCCTCAAAGCCGAGATTGCGCAGAGACTGGAAAGTGTCTTTGCAGGAAAGAACACAGATCTTGA
GGCTCTCATGGAATGGCTAAAGACAAGACCAATCTTGTCACCTCTGACTAAGGGAATTTTAGGATTTGTGTT
CACGCTCACCGTGCCCAGTGAGCGAGGACTGCAGCGTAGACGCTTTGTCCAAAATGCCCTGAATGGGAATGG
GGACCCAAACAACATGGATAGAGCAGTTAAACTATACAAGAAGCTCAAAAGAGAAATAACGTTCCATGGGGC
CAAGGAGGTGTCACTAAGCTATTCAACTGGTGCACTTGCCAGTTGCATGGGCCTCATATACAACAGAATGGG
AACAGTGACCACAGAAGCTGCTTTTGGTCTAGTGTGTGCCACTTGTGAACAGATTGCTGATTCACAGCATCG
GTCTCACAGACAGATGGCCACAACCACCAATCCACTGATCAGGCATGAGAACAGAATGGTGCTGGCTAGCAC
TACGGCAAAGGCTATGGAACAGATGGCTGGATCGAGTGAACAGGCAGCGGAGGCCATGGAGGTTGCTAATCA
GACTAGGCAGATGGTACATGCAATGAGAACTATTGGGACTCATCCTAGCTCCAGTACTGGTCTGAAAGATGA
CCTTCTTGAAAATTTGCAGGCCTACCAGAAGCGAATGGGAGTGCAGATGCAGCGATTCAAGTGATCCTCTCG
CCATTGCAGCAAATATCATTGGGATCTTGCACTTGATATTGTGGATTACTGATCGTCTTTTTTTCAAATGTA
TTTATCGTCGCTTTAAATACGGTTTGAAAAGAGGGCCTTCTACGGAAGGAGTGCCTGAGTCCATGAGGGAAG
AATATCAACAGGAACAGCAGAGTGCTGTGGATGTTGACGATGGTCATTTTGTCAACATAGAGCTAGAGTAA-
-------------------
>A/swine/Michigan/A01259077/2017/1-982
-------------------------ATGAGTCTTCTAACCGAGGTCGAAACGTACGTTCTTTCTATCATACC
GTCAGGCCCCCTCAAAGCCGAGATTGCGCAGAGACTGGAAAGTGTCTTTGCAGGAAAGAACACAGATCTTGA
GGCTCTCATGGAATGGCTAAAGACAAGACCAATCTTGTCTCCTCTGACTAAGGGAATTTTAGGATTTGTGTT
CACGCTCACCGTGCCCAGTGAGCGAGGACTGCAGCGTAGACGCTTTGTCCAAAATGCCTTGAATGGGAATGG
GGACCCAAACAACATGGATAGAGCAGTTAAACTATACAAGAAGCTCAAAAGAGAAATAACGTTCCATGGGGC
CAAGGAAGTGTCACTAAGCTATTCAACTGGTGCACTTGCCAGTTGCATGGGCCTCATATACAACAGGATGGG
AACAGTGACCACAGAAGCTGCTTTTGGTCTAGTGTGCGCCACCTGTGAACAGATTGCTGATTCACAGCATCG
GTCTCACAGACAGATGGCTACAACCACCAATCCACTAATCAGGCATGAGAACAGAATGGTGCTGGCTAGCAC
TACGGCAAAGGCTATGGAACAGATGGCTGGATCGAGTGAACAGGCAGCGGAGGCCATGGAGGTTGCTAATCA
GACTAGGCAGATGGTACATGCAATGAGAACCATTGGGACTCATCCTAGCTCCAGTACTGGTCTGAAAGATGA
CCTTCTTGAAAATTTGCAGGCCTACCAGAAGCGAATGGGAGTGCAGATGCAGCGATTCAAGTGATCCTCTCG
CCATTGCAGCAAATATCATTGGGATCTTGCACCTGATATTGTGGATTGCTGATCGTCTTTTTTTCAAATGTA
TTTATCGTCGCTTTAAATACGGTTTGAAAAGAGGGCCTTCTACGGAAGGAGTGCCTGAGTCCATGAGGGAAG
AATATCAACAGGAACAGCAGAATGCTGTGGATGTTGACGATGGTCATTTTGTCAACATAGAGCTAGAGTAA-
-------------------
>A/swine/Iowa/A01672824/2017/1-982
-------------------------ATGAGTCTTCTAACCGAGGTCGAAACGTACGTTCTTTCTATCATACC
GTCAGGCCCCCTCAAAGCCGAGATTGCGCAGAAACTGGAAAGTGTCTTTGCAGGAAAGAATACAGACCTTGA
GGCTCTCATGGAATGGCTAAAGACAAGACCAATCTTGTCACCTTTGACTAAGGGAATTTTAGGATTTGTGTT
CACGCTCACCGTGCCCAGTGAGCGAGGACTGCAGCGTAGACGCTTTGTCCAAAATGCCCTGAATGGGAATGG
GGACCCAAACAACATGGATAGAGCAGTTAAACTATACAAGAAGCTCAAAAGAGAAATAACGTTCCATGGGGC
CAAGGAGGTATCACTAAGCTATTCAACTGGTGCACTTGCCAGCTGCATGGGCCTCATATACAACAGGATGGG
AACAGTGACCACAGAAGCTGCTTTTGGTCTAGTGTGTGCCACTTGTGAACAGATTGCTGATTCACAGCATCG
GTCTCACAGACAGATGGCTACAACCACCAATCCACTAATCAGGCATGAAAACAGAATGGTGCTGGCTAGCAC
TACGGCAAAGGCTATGGAACAGATGGCTGGATCGAGTGAACAGGCAGCGGAGGCCATGGAGGTTGCTAATCA
GACTAGGCAGATGGTACATGCAATGAGAACTATTGGGACTCATCCTAGTTCCAGTACTGGTCTGAAAGATGA
CCTTCTTGAAAATTTGCAGGCCTACCAGAAGCGAATGGGAGTGCAGATGCAGCGGTTTAAGTGATCCTCTCG
CCATTGCAGCAAATATCATTGGGATCTTGCACCTGATATTGTGGATTACTGATCGTCTTTTTTTCAAATGTA
TTTATCGTCGCTTTAAATACGGTTTGAAAAGAGGGCCTTCTACGGAAGGAGTGCCTGAGTCCATGAGGGAAG
AGTATCAACAGGAACAGCAGAGTGCTGTGGATGTTGACGATGGTCATTTTGTCAACATAGAGCTGGAGTAA-
-------------------
>A/swine/Iowa/A01932417/2017/1-982
-------------------------ATGAGTCTTCTAACCGAGGTCGAAACGTACGTTCTTTCTATCATACC
GTCAGGCCCCCTCAAAGCCGAGATTGCGCAGAGACTGGAAAGTGTTTTTGCAGGAAAGAATACAGACCTTGA
GGCTCTCATGGAATGGCTAAAGACAAGACCAATCTTGTCACCTTTGACTAAGGGAATTTTAGGATTTGTGTT
CACGCTCACCGTGCCCAGTGAGCGAGGACTGCAGCGTAGACGCTTTGTTCAAAATGCCCTGAATGGGAATGG
GGACCCAAACAACATGGATAGAGCAGTTAAACTATACAAGAAGCTCAAAAGAGAAATAACGTTCCATGGGGC
CAAGGAGGTGTCACTAAGCTATTCAACTGGTGCACTTGCTAGTTGCATGGGCCTCATATACAACAGGATGGG
AACAGTGACCACAGAAGCTGCTTTTGGTCTAGTGTGTGCCACTTGTGAACAGATTGCTGACTCACAGCATCG
GTCTCACAGACAGATGGCTACAACCACCAATCCACTAATCAGGCATGAGAACAGAATGGTGCTGGCTAGCAC
TACGGCAAAGGCTATGGAACAGATGGCTGGATCGAGTGAACAGGCAGCGGAGGCCATGGAGGTTGCCAATCA
GACTAGGCAGATGGTACATGCAATGAGAACTATTGGGACTCATCCTAGCTCCAGTACTGGTCTGAAAGATGA
CCTTCTTGAAAATTTGCAGGCCTATCAGAAACGAATGGGAGTGCAGATGCAGCGGTTTAAGTGATCCTCTCG
CCATTGCAGCAAATATCATTGGGATCTTGCACCTGATATTGTGGATTACTGATCGTCTTTTTTTCAAATGTA
TTTATCGTCGCTTTAAATACGGTTTGAAAAGAGGGCCTTCTACGGAAGGAGTGCCTGAGTCCATGAGGGAAG
AATATCAACAGGAACAGCAGAGTGCTGTGGATGTTGACGATGGTCATTTTGTCAACATAGAGCTGGAGTAA-
-------------------
>A/swine/Illinois/A01932036/2017/1-982
-------------------------ATGAGTCTTCTAACCGAGGTCGAAACGTACGTTCTTTCTATCATCCC
GTCAGGCCCCCTCAAAGCCGAGATCGCACAGAGACTGGAAAGTGTCTTTGCAGGAAAGAACACAGATCTTGA
GGCTCTCATGGAATGGCTAAAGACAAGACCAATCTTGTCACCTCTGACTAAGGGAATTTTAGGATTTGTGTT
CACGCTCACCGTGCCCAGTGAGCGAGGACTGCAGCGTAGACGCTTTATCCAAAATGCCCTAAATGGAAATGG
GGACCCGAACAACATGGATAGAGCAGTTAAACTATACAAGAAGCTCAAAAGGGAAATAACGTTCCATGGGGC
CAAGGAGGTGTCACTAAGCTATTCAACTGGTGCACTTGCCAGTTGCATGGGCCTCATATACAACAGGATGGG
AACAGTGACCACAGAAGCTGCTTTTGGTCTAGTTTGTGCCACTTGTGAACAGATTGCTGATTCACAGCATCG
GTCTCACAGACAAATGGCTACTACCACCAATCCACTAATCAGGCATGAAAACAGAATGGTGCTGGCTAGCAC
TACGGCAAAGGCTATGGAACAGGTGGCTGGATCGAGTGAACAGGCAGCAGAGGCCATGGAGGTTGCTAATAA
GACTAGGCAGATGGTACATGCAATGAGAACTATTGGGACTCATCCTAGCTCCAGTGCTGGTCTGAGAGATGA
CCTTCTTGAAAATTTGCAGGCCTACCAGAAGCGAATGGGAGTGCAGATGCAGCGGTTCAAGTGATCCTCTCG
TCATTGCAGCAAACATCATTGGGATCTTGCACCTGATATTGTGGATTACTGATCGTCTTTTTTTCAAATGCA
TTTATCGTCGCTTTAAATACGGTTTGAAAAGAGGGCCTTCTACGGAAGGAGTGCCTGAGTCCATGAGGGAAG
AATATCAACAGGAGCAGCAGAGTGCTGTGGATGTTGACGATGGTCATTTTGTCAACATAGAGCTAGAGTAA-
-------------------
>A/swine/Iowa/A01932578/2017/1-982
-------------------------ATGAGTCTTCTGACCGAGGTCGAAACGTACGTTCTTTCTATCATCCC
GTCAGGCCCCCTCAAAGCCGAGATCGCGCAGAGACTGGAAAGTGTCTTTGCAGGAAAGAACACAGATCTTGA
GGCTCTCATGGAATGGCTAAAGACAAGACCAATCTTGTCACCTTTGACCAAGGGCATTTTGGGATTTGTGTT
CACGCTCACCGTGCCCAGTGAGCGAGGACTGCAGCGTAGACGCTTTGTCCAAAATGCCCTAAATGGGAATGG
GGACCCAAACAACATGGATAGAGCAGTTAAACTATACAAGAAGCTCAAAAGAGAAATAACATTCCATGGGGC
CAAGGAGGTGTCACTAAGCTATTCAACTGGTGCACTTGCCAGTTGCATGGGCCTCATATACAACAGGATGGG
AACAGTAACCACAGAAGCTGCTTTTGGTTTAGTATGTGCCACTTGTGAACAGATAGCTGATTCACAGCATCG
GTCTCACAGACAAATGGCTACTACCACCAATCCACTAATCAGACATGAAAACAGAATGGTGCTGGCTAGCAC
TACGGCAAAGGCCATGGAACAGATGGCTGGATCGAGTGAACAGGCAGCAGAGGCCATGGAGGTTGCTAATCA
GACTAGGCAGATGGTACATGCAATGAGAACTATTGGGACTCATCCTAGCTCCAGTGCTGGTCTGAAAGATGA
CCTTCTTGAAAATTTGCAGGCCTACCAGAAACGAATGGGAGTGCAGATGCAGCGATTCAAGTGATCCTCTCG
TCATCGCAGCAAATATCATTGGGATCTTGCACCTGATATTGTGGATTACAGATCGTCTTTTTTTCAAATGCA
TTTATCGTCGCTTTAGATACGGGTTGAAAAGAGGGCCTTCTACGGAAGGAGTGCCTGAGTCCATGAGGGAAG
AATATCAACAGGAACAGCAGAGTGCGGTGGATGTTGACGATGGTCATTTTGTCAACATAGAGCTAGAGTAA-
-------------------
>A/swine/Indiana/A01932256/2017/1-982
-------------------------ATGAGTCTTCTAACCGAGGTCGAAACGTACGTTCTTTCTATAATACC
GTCAGGCCCCCTCAAAGCCGAGATCGCGCAGAGACTGGAGAGTGTCTTTGCAGGAAAGAACACAGATCTTGA
GGCTCTCATGGAATGGCTAAAGACAAGACCAATCTTGTCACCTCTGACTAAGGGAATTTTAGGATTTGTGTT
CACGCTCACCGTGCCCAGTGAGCGAGGACTGCAGCGTAGACGCTTTGTCCAAAATGCCCTGAATGGGAATGG
GGACCCAAACAACATGGATAGAGCAGTTAAACTATACAAGAAGCTCAAAAGAGAAATAACGTTCCATGGGGC
CAAGGAGGTGTCACTAAGCTATTCAACTGGTGCACTTGCCAGCTGCATGGGCCTCATATATAACAGGATGGG
AACAGTGACCACAGAAGCTGCTTTTGGTCTAGTGTGTGCCACTTGTGAACAGATTGCTGATTCACAGCATCG
GTCTCACAGACAGATGGCTACTACCACCAATCCACTAATCAGGCATGAGAACAGAATGGTGCTGGCTAGCAC
TACGGCAAAGGCTATGGAACAGATGGCTGGATCGAGTGAACAGGCAGCGGAGGCCATGGAGGTTGCTAATCA
GACTAGGCAGATGGTACATGCAATGAGAACTATTGGGACTCATCCTAGCTCCAGTAATGGTCTGAAAGATGA
CCTTCTTGAAAATTTGCAGGCCTACCAGAAGCGAATGGGAGTGCAGATGCAGCGATTCAAGTGATCCTCTCG
CCGTTGCAGCAAACATCATTGGGATCTTGCACTTGATATTGTGGATTACTGATCGTCTTTTTTTCAAATGTA
TTTATCGTCGCTTTAAATACGGTTTGAAAAGAGGGCCTTCAACGGAAGGAGTGCCTGAGTCCATGAGGGAAG
AATATCAACAGGAGCAGCAGAGTGCTGTGGATGTTGACGATGGTCATTTTGTCAACATAGAGCTAGAGTAA-
-------------------
>A/swine/Oklahoma/A01932035/2017/1-982
-------------------------ATGAGTCTTCTGACCGAGGTCGAAACGTACGTTCTTTCTATCATCCC
GTCAGGCCCCCTCAAAGCCGAGATCGCACAGAGACTGGAAAGTGTCTTTGCAGGAAAGAACACAGATCTTGA
GGCCCTCATGGAATGGCTAAAGACAAGACCAATCTTGTCACCTCTGACTAAGGGGATTTTAGGATTTGTGTT
CACGCTCACCGTGCCCAGTGAGCGAGGACTGCAGCGTAGACGCTTTGTCCAAAATGCCCTAAATGGAAATGG
GGACCCGAACAACATGGATAGAGCAGTTAAGCTATACAAGAAGCTCAAAAGAGAAATAACATTCCATGGGGC
CAAGGAGGTGTCACTAAGCTATTCAACTGGTGCACTTGCCAGTTGCATGGGCCTCATATACAACAGGATGGG
AACAGTAACCACAGAAGCTGCTTTTGGTCTAGTGTGTGCCACTTGTGAACAGATTGCTGATTCACAGCATCG
GTCTCACAGACAAATGGCTACTACCACCAATCCACTGATCAGGCATGAAAACAGGATGGTGCTGGCTAGCAC
TACGGCAAAGGCTATGGAACAGATGGCTGGATCGAGTGAGCAGGCAGCAGAGGCCATGGAGGTTGCTAATAA
GACTAGGCAGATGGTACATGCAATGAGAACTATTGGGACTCATCCTAGCTCCAGTGCTGGTCTGAAAGATGA
TCTTCTTGAAAATTTGCAGGCCTACCAGAAGCGAATGGGAGTGCAAATGCAGCGATTCAAATGATCCTCTCG
TCATTGCAGCAAATATCATTGGGATCTTGCACCTGATATTGTGGATTTCTGATCGTCTTTTTTTCAAATGTG
TTTATCGTCACTTTAAATACGGTTTGAAAAGAGGTCCTTCTACAGAAGGAGTGCCTGAGTCCATGAGGGAAG
AATATCAACAGGAACAGCAGAGTTCTGTGGATGTTGACGATGGTCATTTTGTCAACATAGAGCTAGAGTAA-
-------------------
>A/swine/Missouri/A01672819/2017/1-982
-------------------------ATGAGTCTTCTAACCGAGGTCGAAACGTACGTTCTTTCTATCATCCC
GTCAGGCTCCCTCAAAGCCGAGATCGCGCAGAGACTGGAAAGTGTTTTCTCAGGAAAGAGCGCAGATCTTGA
GGCTCTCATGGAATGGCTAAAGACAAGACCAATCTTGTCACCTCTGACTAAGGGGATTTTAGGATTTGTGTT
CACGCTCACCGTGCCCAGTGAGCGAGGACTGCAGCGTAGACGCTTTGTCCAAAATGCCCTAAATGGGAATGG
GGACCCGAACAACATGGATAGAGCAGTTAAACTATACAAGAAGCTCAAAAGAGAAATAACGTTCCATGGGGC
CAAGGAGGTGTCACTAAGCTATTCAACTGGTGCACTTGCCAGTTGCATGGGCCTCATATACAACAGAATGGG
AACAGTGACCACAGAAGCTGCTTTTGGTCTAGTGTGTGCCACTTGTGAACAGATTGCTGATTCACAGCATCG
GTCTCACAGACAAATGGCTACTACCACCAATCCACTAATCAGGCATGAAAACAGAATGGTGCTGGCTAGCAC
TACGGCAAAGGCTATGGAACAGATGGCTGGATCGAGTGAACAGGCAGCAGAGGCCATGGAGGTTGCTAATCA
AACTAGGCAGATGGTACATGCAATGAGAACCATTGGGACTCATCCTAGCTCCAGTGCTGGTCTGAAAGATGA
CCTTCTTGAAAATTTGCAGGCCTACCAGAAGCGAATGGGAGTGCAGATGCAGCGATTCAAATGATCCTCTCG
TCATTGCAGCAAATATCATTGGGATCTTGCACCTGATATTGTGGATTACTGATCGTCTTTTCTTCAAATGTA
TTTATCGTCGCTTTAAATACGGTTTGAAAAGAGGGCCTTCTACGGAAGGAGTGCCTGAGTCCATGAGGGAAG
AATATCAACAGGAACAGCAGAGTGCTGTGGATGTTGACGATGGTCATTTTGTCAACATAGAGCTAGAGTAA-
-------------------
>A/swine/Missouri/A01932424/2017/1-982
-------------------------ATGAGTCTTCTAACCGAGGTCGAAACGTACGTTCTTTCTATCATCCC
GTCAGGCCCCCTCAAAGCCGAGATCGCGCAGAGACTGGAAAGTGTCTTTGCAGGAAAGAACACAGATCTCGA
GGCCCTCATGGAATGGCTAAAGACAAGACCAATCTTGTCACCTTTGACTAAGGGAATTTTAGGATTTGTGTT
CACGCTCACCGTGCCCAGTGAGCGAGGACTGCAGCGTAGACGTTTTGTCCAAAATGCCCTAAATGGGAATGG
GGACCCGAACAACATGGATAGAGCAGTTAAGCTATACAAGAAGCTCAAAAGAGAAATAACGTTCCATGGGGC
CAAGGAGGTGTCACTAAGCTATTCAACTGGTGCACTTGCCAGTTGCATGGGCCTCATATACAACAGGATGGG
AACAGTGACCACAGAATCTGCTTTTGGTATAGTGTGTGCCACTTGTGAACAAATTGCTGATTCACAGCATCG
GTCTCACAGACAAATGGCTACTACCACCAACCCACTAATCAGGCATGAAAACAGAATGGTGCTGGCTAGCAC
TACGGCAAAGGCTATGGAACAAATGGCTGGGTCGAGTGAACAGGCAGCAGAGGCAATGGAGGTTGCTAATCA
GACTAGGCAGATGGTACATGCAATGAGAACTATTGGAACTCATCCTAGCTCCAGTGCTGGTCTGAAAGATGA
CCTTCTTGAAAATTTGCAGGCCTACCAGAAGCGAATGGGAGTGCAGATGCAGCGATTCAAGTGATCCATTCT
TCATTGCAGCAAATATCATTGGGATCTTGCACCTGATATTGTGGATTTCTGATCGTCTTTTTTTCAAATGTA
TTTATCGTCGCTTTAAATACGGTTTGAAAAGAGGACCTTCTACAGAAGGAGTGCCTGAGTCCATGAGGGAAG
AATACCAACAGGAACAGCAGAGTGCTGTGGATGTTGACGATGGTCATTTTGTCAACATAGAGCTAGAGTAA-
-------------------
>A/swine/Iowa/A01932419/2017/1-982
-------------------------ATGAGTCTTCTAACCGAGGTCGAAACGTACGTTCTTTCTATCATACC
GTCAGGCCCCCTCAAAGCCGAGATTGCGCAGAGACTGGAAAGTGTCTTTGCAGGAAAGAATACAGACCTTGA
GGCTCTCATGGAATGGCTAAAGACAAGACCAATCTTGTCACCTTTGACTAAGGGAATTTTAGGATTTGTGTT
CACGCTCACCGTGCCCAGTGAGCGAGGACTGCAGCGTAGACGCTTTGTCCAAAATGCCCTGAATGGGAATGG
GGACCCAAACAACATGGATAGAGCAGTTAAACTATACAAGAAGCTCAAAAGAGAAATAACGTTCCATGGGGC
CAAGGAGGTGTCACTAAGCTATTCAACTGGTGCACTTGCCAGTTGCATGGGCCTCATATACAACAGGATGGG
AACAGTGACCACAGAAGCTGCTTTTGGTCTAGTGTGTGCCACTTGTGAACAGATTGCTGATTCACAGCATCG
GTCTCACAGACAGATGGCTACAACCACCAATCCACTAATCAGGCATGAGAACAGAATGGTGCTGGCTAGCAC
TACGGCAAAGGCTATGGAACAGATGGCTGGATCAAGTGAACAGGCAGCGGAGGCCATGGAGGTTGCTAATCA
GACTAGGCAGATGGTACATGCAATGAGAACTATTGGGACTCATCCTAGTTCCAGTACTGGTCTGAAAGATGA
CCTTCTTGAAAATTTGCAGGCCTATCAGAAACGAATGGGAGTGCAGATGCAGCGGTTTAAGTGATCCACTCG
CCATTGCAGCAAATATCATTGGGATCTTGCACCTGATATTGTGGATTACTGATCGTCTTTTTTTCAAATGTA
TTTATCGTCGCTTTAAATACGGTTTGAAAAGAGGGCCTTCTACGGAAGGAGTGCCTGAGTCCATGAGGGAAG
AATATCAACAGGAACAGCAGAGTGCTGTGGATGTTGACGATGGTCATTTTGTCAACATAGAGCTGGAGTAA-
-------------------
>A/swine/Indiana/A01672825/2017/1-982
-------------------------ATGAGTCTTCTAACCGAGGTCGAAACGTACGTTCTTTCTATCATCCC
GTCAGGCCCCCTCAAAGCCGAGATCGCGCAGAGACTGGAAAGTGTATTTGCAGGAAAGAACACAGACCTTGA
GGCTCTCATGGAATGGCTAAAGACAAGACCAATCTTGTCACCTCTGACTAAGGGAATTTTAGGATTTGTGTT
CACGCTCACCGTGCCCAGTGAGCGAGGACTGCAGCGTAGACGCTTTGTCCAAAATGCCCTAAATGGGAATGG
GGACCCGAACAACATGGATAGAGCAGTTAAACTATACAAGAAGCTCAAAAGAGAAATAACGTTCCATGGGGC
TAAGGAGGTGTCACTAAGCTATTCAACTGGTGCACTTGCCAGTTGCATGGGCCTCATATACAACAGGATGGG
AACAGTGACCACAGAAGCTGCTTTTGGTCTAGTGTGTGCCACTTGTGAACAGATTGCTGATTCACAGCATCG
ATCTCACAGACAAATGGTTACTACCACCAATCCACTAATCAGGCATGAAAACAGAATGGTGCTGGCTAGCAC
TACTGCAAAGGCTATGGAACAGATGGCTGGATCGAGTGAACAGGCAGCAGAGGCCATGGAGGTTGCTAATCA
GACTAGGCAGATGGTACATGCGATGAGGACTATTGGGACTCATCCTAGCTCCAGTGCTGGTCTGAAGGATGA
CCTTCTTGAAAATTTACAGGCCTACCAGAAGCGAATGGGAGTGCAAATGCAGCGATTCAAGTGATCCTCTCG
TCATTGCAGCAAATATCATTGGGATCTTGCACCTGATATTGTGGATTACTGATCGTCTTTTTTTCAAATGTA
TTTATCGTCGCTTTAAATACGGTTTGAAAAGAGGGCCTCCTACAGAAGGAGTGCCTGAGTCCATGAGGGAAG
AATATCAACAGGAACAGCAGAGTGCTGTAGATGTTGACGATGGTCATTTTGTCAACATAGAGCTAGAGTAA-
-------------------
>A/swine/Missouri/A01672702/2017/1-982
-------------------------ATGAGTCTTCTGACCGAGGTCGAAACGTACGTTCTTTCTATCATCCC
GTCAGGCCCCCTCAAAGCCGAGATCGCACAGAGACTGGAAAGTGTCTTTGCAGGAAAGAACACAGATCTTGA
GGCCCTCATGGAATGGCTAAAGACAAGACCAATCTTGTCACCTCTGACTAAGGGGATTTTAGGATTTGTGTT
CACGCTCACCGTGCCCAGTGAGCGAGGACTGCAGCGTAGACGCTTTGTCCAAAATGCCCTAAATGGAAATGG
GGACCCGAACAACATGGATAGAGCAGTTAAGCTATACAAGAAGCTCAAAAGAGAAATAACATTCCATGGGGC
CAAGGAGGTGTCACTAAGCTATTCAACTGGTGCACTTGCCAGTTGCATGGGCCTCATATACAACAGGATGGG
AACAGTAACCACAGAAGCTGCTTTTGGTCTAGTGTGTGCCACTTGTGAACAGATTGCTGATTCACAGCATCG
GTCTCACAGACAAATGGCTACTACCACCAATCCACTGATCAGGCATGAAAACAGGATGGTGCTGGCTAGCAC
TACGGCAAAGGCTATGGAACAGATGGCTGGATCGAGTGAGCAGGCAGCAGAGGCCATGGAGGTTGCTAATAA
AACTAGGCAGATGGTACATGCAATGAGAACTATTGGGACTCATCCTAGCTCCAGTGCTGGTCTGAAAGATGA
TCTTCTTGAAAATTTGCAGGCCTACCAGAAGCGAATGGGAGTGCAAATGCAGCGATTCAAATGATCCTCTCG
TCATTGCAGCAAATATCATTGGGATCTTGCACCTGATATTGTGGATTTCTGATCGTCTTTTTTTCAAATGTG
TTTATCGTCACTTTAAATACGGTTTGAAAAGAGGGCCTTCTACAGAAGGAGTGCCTGAGTCCATGAGGGAAG
AATATCAACAGGAACAGCAGAGTTCTGTGGATGTTGACGATGGTCATTTTGTCAACATAGAGCTAGAGTAA-
-------------------
>A/swine/Iowa/A01932420/2017/1-982
-------------------------ATGAGTCTTCTAACCGAGGTCGAAACGTACGTTCTTTCTATCATCCC
GTCAGGCTCCCTCAAAGCCGAGATCGCGCAGAGACTGGAAAGTGTTTTTTCAGGAAAGAACACAGATCTTGA
GGCTCTCATGGAATGGCTAAAGACAAGACCAATCTTGTCACCTCTGACCAAGGGGATTTTAGGATTTGTGTT
CACGCTCACCGTGCCCAGTGAGCGAGGACTGCAGCGTAGACGCTTTGTCCAAAATGCCCTAAATGGGAATGG
GGACCCGAACAACATGGATAGAGCAGTTAAACTATACAAGAAGCTCAAAAGAGAAATAACGTTCCATGGGGC
CAAGGAGGTGTCACTAAGCTATTCAACTGGTGCACTTGCCAGTTGCATGGGCCTCATATACAACAGGATGGG
AACAGTGACCACAGAAGCTGCTTTTGGTCTAGTGTGTGCCACTTGTGAACAGATTGCTGATTCACAGCATCG
GTCTCACAGACAAATGGCTACTACCACCAATCCACTAATCAGACATGAAAACAGAATGGTGCTAGCTAGCAC
TACGGCAAAGGCTATGGAACAGATGGCTGGATCGAGTGAACAGGCAGCAGAGGCCATGGAGGTTGCTAATCA
AACTAGGCAGATGGTACATGCAATGAGAACTATTGGGACTCATCCTAGCTCCAGTGCTGGTCTGAAAGATGA
CCTTCTTGAAAATTTGCAGGCTTACCAGAAGCGAATGGGAGTGCAGATGCAGCGATTCAAATGACCCTCTCG
TCATTGCAGCAAATATCATTGGGATCTTGCACCTGATATTGTGGATTACTGATCGTCTTTTTTTCAAATGTA
TTTATCGTCGCTTTAAATACGGTTTGAAAAGAGGGCCTTCTACGGAAGGAGTGCCTGAGTCCATGAGGGAAG
AATATCAACAGGAACAGCAGAGTGCTGTGGATGTTGACGATGGTCATTTTGTCAACATAGAGCTAAAGTAA-
-------------------
>A/swine/North_Carolina/A01672751/2017/1-982
-------------------------ATGAGTCTTCTAACCGAGGTCGAAACGTACGTTCTATCTATCATACC
GTCAGGCCCCCTCAAAGCCGAGATCGCGCAGAGACTGGAAAGTGTCTTTGCAGGAAAGAACACAGATCTTGA
AGCTCTCATGGAATGGCTAAAGACAAGACCAATCTTGTCACCTCTGACTAAGGGAATTTTAGGATTTGTGTT
CACGCTCACCGTGCCCAGTGAGCGAGGACTGCAGCGTAGACGCTTTGTCCAAAATGCCCTGAATGGGAATGG
GGACCCAAACAACATGGATAGAGCAGTTAAACTATACAAGAAGCTCAAAAGAGAAATAACATTCCATGGGGC
CAAGGAGGTGTCACTAAGCTATTCAACTGGTGCACTTGCCAGTTGCATGGGCCTCATATACAACAGGATGGG
AACAGTGACCACAGAAGCTGCTTTTGGTCTAGTGTGTGCCACTTGTGAACAGATTGCTGATTCACAGCATCG
GTCTCACAGACAGATGGCTACAACCACCAATCCACTAATCAGGCATGAGAACAGAATGGTGCTGGCTAGCAC
TACGGCAAAGGCTATGGAACAGATGGCTGGATCGAGTGAACAGGCAGCGGAGGCCATGGAGGTTGCTAATCA
GACTAGGCAGATGGTACATGCAATGAGAACTATTGGGACTCACCCTAGCTCCAGTACTGGTCTGAAAGATGA
TCTTCTTGAAAATTTGCAGGCCTACCAGAAGCGAATGGGAGTGCAGATGCAGCGATTCAAGTGATCCTCTCG
CCATTGCAGCAAATATCATTGGGATCTTGCACCTGATATTGTGGATTACTGATCGCCTTTTTTTCAAATGTA
TTTATCGTCGCTTTAAATACGGTTTGAAAAGAGGGCCTTCAACGGAAGGAGTGCCTGAGTCCATGAGGGAAG
AATATCAACAGGAACAGCAGAGTGCTGTGGATGTTGACGATGGTCATTTTGTCAACATAGAGCTAGAGTAA-
-------------------
>A/swine/Wisconsin/A01932590/2017/1-982
-------------------------ATGAGTCTTCTAACCGAGGTCGAAACGTACGTTCTTTCTATCATACC
GTCAGGCCCCCTCAAAGCCGAGATTGCGCAGAGACTGGAAAGTGTCTTTGCAGGAAAGAATACAGACCTTGA
GGCTCTCATGGAATGGCTAAAGACAAGACCAATCTTGTCACCTTTGACTAAGGGAATTTTAGGATTTGTGTT
CACGCTCACCGTGCCCAGTGAGCGAGGACTGCAGCGTAGACGCTTTGTCCAAAATGCCCTGAATGGGAATGG
GGACCCAAACAACATGGATAGAGCAGTTAAACTATACAAGAAGCTCAAAAGAGAAATAACGTTCCATGGGGC
CAAGGAGGTGTCACTAAGCTATTCAACTGGTGCACTTGCCAGTTGCATGGGCCTCATATACAACAGGATGGG
AACAGTGACCACTGAAGCTGCTTTTGGTCTAGTGTGTGCCACTTGTGAACAAATTGCTGATTCACAGCATCG
GTCTCACAGACAGATGGCCACAACCACCAATCCACTAATCAGGCATGAGAACAGAATGGTGCTGGCTAGCAC
TACGGCAAAGGCTATGGAACAGATGGCTGGATCGAGTGAACAGGCAGCGGAGGCCATGGAGGTTGCTAATCA
GACTAGACAGATGGTACATGCAATGAGAACTATCGGGACTCATCCTAGTTCCAGTACTGGTCTGAAAGATGA
CCTTCTTGAAAATTTGCAGGCCTATCAGAAGCGAATGGGAGTGCAGATGCAGCGGTTTAAGTGATCCTCTCG
CCATTGCAGCTAATATCATTGGGATCTTGCACCTGATATTGTGGATTACTGATCGTCTTTTTTTCAAATGTA
TTTATCGTCGCTTTAAATACGGTTTGAAAAGAGGGCCTTCTACGGAAGGAGTGCCTGAGTCCATGAGGGAAG
AATATCAACAGGAACAGCAGAGTGCTGTGGATGTTGACGATGGTCATTTTGTCAACATAGAGCTGGAGTAA-
-------------------
>A/swine/Kansas/A01378028/2017/1-1025
--CAAAAGCAGGTAGATGTTTAAAGATGAGTCTTCTAACAGAGGTCGAAACGTACGTTCTTTCTATCATACC
GTCAGGCCCCCTCAAAGCCGAGATCGCGCAGAGACTGGAAAGTGTCTTTGCAGGAAAGAACACAGATCTTGA
GGCTCTCATGGAATGGCTAAAGACAAGACCAATCTTGTCACCTCTGACTAAGGGAATTTTAGGGTTTGTGTT
CACGCTCACCGTGCCCAGTGAGCGAGGACTGCAGCGTAGACGCTTTGTCCAAAATGCCCTAAATGGGAATGG
GGACCCAAACAACATGGATAGAGCAGTTAAACTATACAAGAAGCTCAAAAGAGAAATAACGTTCCATGGGGC
CAAGGAGGTGTCACTAAGCTATTCAACTGGTGCACTTGCCAGTTGCATGGGCCTCATATACAACAGGATGGG
AACAGTGACCACAGAGGCTGCTTTTGGTCTAGTGTGTGCCACTTGTGAACAGATTGCTGATTCACAGCATCG
GTCTCACAGACAAATGGCTACTACCACCAATCCGCTAATCAGGCATGAAAACAGAATGGTGCTGGCTAGCAC
TACGGCAAAGGCTATGGAACAGATGGCTGGATCGAGTGAACAGGCAGCGGAGGCCATGGAGGTTGCTAATCA
GACTAGGCAGATGGTACATGCAATGAGAACTATTGGGACTCATCCTAGCTCCAGTACTGGTCTGAAAGATGA
CCTTCTTGAAAATTTGCAGGCCTACCAGAAGCGAATGGGAGTGCAGATGCAGCGATTCAAGTGATCCTCTCG
CCATTGCAGCAAATATCATTGGGATATTGCACCTGATATTGTGGATTACTGATCGTCTTTTTTTCAAATGTA
TTTATCGTCGCTTTAAATACGGTTTGAAAAGAGGGCCTTCTACGGAAGGGGTGCCTGAGTCCATGAGGGAAG
AATATCAACAGGAACAGCAGAGTGCTGTGGATGTTGACGATGGTCATTTTGTCAACATAGAGCTAGAGTAAA
AAACTACCTTGTTTCTACT
>A/swine/South_Carolina/A01932046/2017/1-982
-------------------------ATGAGTCTTCTAACCGAGGTCGAAACGTACGTTCTTTCTATCATACC
GTCAGGCCCCCTCAAAGCCGAGATCGCGCAGAGATTTGAAAGTGTTTTTGCGGGAAAGAACACAGACCTTGA
GGCTCTCATGGAATGGCTGAAGACAAGACCTATCTTGTCACCTCTGACTAAGGGAATTCTAGGATTTGTGTT
CACGCTCACCGTGCCCAGTGAGCGAGGACTGCAGCGTAGACGCTTTGTCCAAAATGCCCTAAATGGGAATGG
GGACCCGAACAACATGGATAGAGCAGTTAAACTATACAAGAAGCTCAAAAGAGAAATAACGTTTCATGGGGC
CAAGGAGGTGTCACTAAGCTATTCAACTGGTGCACTTGCCAGTTGCATGGGCCTCATATACAACAGGATGGG
AACAGTGACCACAGAAGCTGCTTTTGGTCTAGTGTGTGCCACTTGTGAACAGATTGCTGATTCACAGCATCG
GTCTCACAGACAGATGGCTACTACCACCAACCCACTAATCAGGCATGAGAACAGAATGGTGCTGGCTAGCAC
TACGGCAAAGGCTATGGAACAAATGGCTGGATCAAGTGAACAGGCAGCGGAGGCCATGGAGGTTGCTAATCA
GACTAGGCAGATGGTACATGCAATGAGAACTATTGGGACTCATCCTAGCTCCAGTGCTGGTCTGAAAGATGA
CCTTCTTGAAAATTTGCAGGCCTACCAGAAGCGAATGGGTGTGCAGATGCAGCGATTCAAGTGATCCTCTCG
TCATTGCAGCAAATATCATTGGGATCTTGCACCTGATATTGTGGATTGCTGATCGTCTTTTTTTCAAATGTA
TTTATCGTCGCTTTAAATACGGTTTGAAAAGAGGGCCCTCTACGGAAGGAGTGCCTAAGTCCATGAGGGAAG
AATATCAACAGGAACAGCAGAATGCTGTGGATGTTGACGATGGTCATTTTGTCAACATAGAGCTAGAGTAA-
-------------------
>A/swine/Ohio/17TOSU1384/2017/1-982
-------------------------ATGAGTCTTCTAACCGAGGTCGAAACGTACGTTCTTTCTATCATCCC
GTCAGGCCCCCTCAAAGCCGAGATCGCGCAGAGACTGGAAAGTGTATTTGCAGGAAAGAACACAGATCTTGA
GGCTCTCATGGAATGGCTAAAGACAAGACCAATCTTGTCACCTCTGACTAAGGGAATTTTAGGATTTGTGTT
CACGCTCACCGTGCCCAGTGAGCGAGGACTGCAGCGTAGACGCTTTGTCCAAAATGCCCTAAATGGGAATGG
GGACCCGAACAACATGGATAGAGCAGTTAAACTATACAAGAAGCTCAAAAGAGAAATAACGTTCCATGGGGC
TAAAGAGGTGTCACTAAGCTATTCAACTGGTGCACTTGCCAGTTGCCTGGGCCTCATATACAACAGGATGGG
AACAGTGACCACAGAAGCTGCTTTTGGTCTAGTGTGTGCCACTTGTGAACAGATTGCTGATTCACAGCATCG
ATCTCACAGACAAATGGTTGCTACCACCAATCCACTAATCAGGCATGAAAACAGAATGGTGCTGGCTAGCAC
TACTGCAAAGGCTATGGAACAGATGGCTGGATCGAGTGAACAGGCAGCAGAGGCCATGGAGGTTGCTAATCA
GACTAGGCAGATGGTACATGCAATGAGGACTATTGGGACTCATCCTAGCTCCAGTGCTGGTCTGAAGGATGA
CCTTCTTGAAAATTTACAGGCCTACCAGAAGCGAATGGGAGTGCAAATGCAGCGATTCAAGTGATCCTCTCG
TCATTGCAGCAAATATCATTGGGATCTTGCACCTGATATTGTGGATTACTGATCGTCTTTTTTTCAAATGTA
TTTATCGTCGCTTTAAATACGGTTTGAAAAGAGGGCCTCCTACAGAAGGAGTGCCTGAGTCCATGAGGGAAG
AATATCAACAGGAACAGCAGAGTGCTGTAGATGTTGACGATGGTCATTTTGTCAACATAGAGCTAGAGTAA-
-------------------
>A/swine/Missouri/A01932047/2017/1-982
-------------------------ATGAGTCTTCTAACCGAGGTCGAAACGTACGTCCTTTCTATCATACC
GTCAGGCCCCCTCAAAGCCGAGATCGCGCAGAGACTGGAAAGTGTCTTTGCAGGAAAGAACACAGATCTTGA
GGCTCTCATGGAATGGCTAAAGACAAGACCAATCTTGTCACCTCTGACTAAAGGAATTTTAGGGTTTGTGTT
CACGCTCACCGTGCCCAGTGAGCGAGGACTGCAGCGTAGACGCTTTGTCCAAAATGCCCTAAATGGGAATGG
GGACCCAAACAACATGGATAGAGCAGTCAAACTATACAAGAAGCTCAAAAGAGAAATAACGTTCCATGGGGC
CAAGGAGGTGTCACTAAGCTATTCAACTGGTGCACTTGCCAGTTGCATGGGCCTCATATACAACAGGATGGG
AACAGTGACCACTGAAGCTGCATTTGGTCTAGTGTGTGCCACTTGTGAACAGATTGCTGATTCTCAGCATCG
GTCTCACAGACAGATGGCTACTACCACCAATCCACTAATCAGGCATGAGAACAGAATGGTGCTAGCTAGCAC
TACGGCAAAGGCTATGGAACAGATGGCTGGATCGAGTGAACAGGCAGCGGAGGCCATGGAGGTTGCTAATCA
GACTAGGCAGATGGTACATGCAATGAGAACTATTGGGACTCATCCTAGCTCTAGCACTGGTCTGAAAGATGA
CCTTCTTGAAAATTTGCAGGCCTACCAGAAGCGAATGGGAGTGCAGATGCAGCGGTTCAAGTGATCCTCTCG
CCATTGCAGCAAATATCATTGGGATCTTGCACCTGATATTGTGGATTACTGATCGTCTTTTTTTCAAATGTA
TTTATCGTCGCTTTAAATACGGTTTGAAAAGAGGGCCTTCTACGGAAGGAGTGCCTGAGTCCATGAGGGAAG
AATATCAACAGGAACAGCAGAATGCTGTGGATGTTGACGATGGTCATTTTGTCAACATAGAGCTAGAGTAA-
-------------------
>A/swine/Oklahoma/A01672680/2017/1-982
-------------------------ATGAGTCTTCTAACCGAGGTCGAAACGTACGTTCTTTCTATCATCCC
GTCAGGCCCCCTCAAAGCCGAGATCGCGCAGAGACTGGAAAGTGTCTTTGCAGGAAAGAACACAGATCTTGA
GGCTCTCATGGAATGGCTAAAGACAAGACCAATCTTGTCACCTCTGACTAAGGGAATTTTAGGATTTGTGTT
CACGCTCACCGTGCCCAGTGAGCGAGGACTGCAGCGTAGACGCTTTGTCCAAAATGCCCTAAATGGGAATGG
GGACCCGAACAACATGGATAGAGCAGTTAAACTATACAAGAAGCTCAAAAGAGAAATAACGTTCCATGGGGC
CAAGGAGGTGTCGCTAAGCTATTCAACTGGTGCACTTGCCAGTTGCATGGGCCTCATATACAACAGGATGGG
AACAGTGACCACAGAAGCTGCTTTTGGCCTAGTGTGTGCCACTTGTGAACAGATTGCTGATTCACAGCATCG
GTCCCACAGACAAATGGCTACTACTACCAATCCATTAATCAGGCATGAAAACAGAATGGTTCTGGCTAGCAC
TACGGCAAAGGCTATGGAACAGATGGCTGGATCGAGTGAACAGGCAGCAGAGGCCATGGAGGTTGCTAATCA
GACTAGGCAGATGGTGCATGCAATGAGAACTATTGGGACTCATCCTAGCTCCAGTGCTGGTCTGAAAGATGA
CCTCCTTGAAAATTTGCAGGCCTACCAGAAGCGAATGGGAGTGCAGATGCAGCGATTCAAGTGATCCTCTCG
TCATTGCAGCAAATATCATTGGGATCTTGCACATGATATTGTGGATTACTGATCGTCTTTTGTTCAAATGCA
TTTATCGTCGCTTTAAATACGGTTTGAAAAGAGGGCCTTCTACGGAAGGAGTGCCTGAGTCCATGAGGGAAG
AATATCAACAGGAACAGCAGAGTGCTGTGGATGTTGACGATGGTCATTTTGTCAACATAGAGCTAGAGTAA-
-------------------
>A/swine/Minnesota/A01932042/2017/1-982
-------------------------ATGAGTCTTCTAACCGAGGTCGAAACGTACGTTCTTTCTATCATACC
GTCAGGCCCCCTCAAAGCCGAGATTGCGCAGAGACTGGAAAGTGTCTTTGCAGGAAAGAATACAGACCTTGA
GGCTCTCATGGAATGGCTAAAGACAAGACCAATCTTGTCACCTTTGACTAAGGGAATTTTAGGATTTGTGTT
CACGCTCACCGTGCCCAGTGAGCGAGGACTGCAGCGTAGACGCTTTGTCCAAAATGCCCTGAATGGGAATGG
GGACCCAAACAACATGGATAGAGCAGTTAAACTATACAAGAAGCTCAAAAGAGAAATAACGTTCCATGGGGC
CAAGGAGGTGTCACTAAGCTATTCAACTGGTGCACTTGCCAGTTGTATGGGCCTCATATACAACAGGATGGG
AACAGTGACCACAGAAGCTGCTTTTGGTCTAGTGTGTGCCACTTGTGAACAGATTGCTGACTCACAGCATCG
GTCTCACAGACAGATGGCTACAACCACCAATCCACTAATCAGGCATGAGAACAGAATGGTGCTGGCTAGCAC
TACGGCAAAGGCTATGGAACAGATGGCTGGATCGAGTGAACAGGCAGCGGAGGCCATGGAGGTTGCCAATCA
GACTAGGCAGATGGTACATGCAATGAGAACTATTGGGACTCATCCTAGTTCCAGTACTGGTCTGAAAGATGA
CCTTCTTGAAAATTTGCAGGCCTATCAGAAACGAATGGGAGTGCAGATGCAGCGGTTTAAGTGATCCTCTCG
CCATTGCAGCAAATATCATTGGGATCTTGCACCTGATATTGTGGATTACTGATCGTCTTTTTTTCAAATGTA
TTTATCGTCGCTTTAAATACGGTTTGAAAAGAGGGCCTTCTACGGAAGGAGTGCCTGAGTCCATGAGGGAAG
AATATCAACAGGAACAGCAGAGTGCTGTGGATGTTGACGATGGTCATTTTGTCAACATAGAGCTGGAGTAA-
-------------------
>A/swine/Illinois/A01932037/2017/1-982
-------------------------ATGAGTCTTCTAACCGAGGTTGAAACGTACGTTCTTTCTATCATCCC
GTCAGGCTCCCTCAAAGCCGAGATCGCGCAGAGACTGGAAAGTGTTTTTTCAGGAAAGAACGCAGATCTTGA
GGCTCTCATGGAATGGCTAAAGACAAGACCAATCTTGTCACCTCTGACTAAGGGGATTTTAGGATTTGTGTT
CACGCTCACCGTGCCCAGTGAGCGAGGACTGCAGCGTAGACGCTTTGTCCAAAATGCCCTAAATGGGAATGG
GGACCCGAACAACATGGATAGAGCAGTTAAACTATACAAGAAGCTCAAAAGAGAAATAACGTTCCATGGGGC
CAAGGAGGTGTCACTAAGCTATTCAACTGGTGCACTTGCCAGTTGCATGGGCCTCATATACAACAGAATGGG
AACAGTGACCACAGAAGCTGCTTTTGGTCTAGTGTGTGCCACTTGTGAACAGATTGCTGATTCACAGCATCG
GTCTCACAGACAAATGGCCACTACCACCAATCCACTAATCAGGCATGAAAACAGAATGGTGCTGGCTAGCAC
TACGGCAAAGGCTATGGAACAGATGGCTGGATCGAGTGAGCAGGCAGCAGAGGCCATGGAGGTTGCTAATCA
AACTAGGCAGATGGTACATGCAATGAGAACCATTGGGACTCATCCTAGCTCCAGTGCTGGTCTGAAAGATGA
CCTTCTTGAAAATTTGCAGGCCTACCAGAAGCGAATGGGAGTGCAGATGCAGCGATTCAAATGATCCTCTCG
TCATTGCAGCAAATATCATTGGGATCTTGCACCTGATATTGTGGATTACTGATCGTCTTTTTTTCAAATGTA
TTTATCGTCGCTTTAAATACGGTTTGAAAAGAGGGCCTTCTACGGAAGGAGTGCCTGAGTCCATGAGGGAAG
AATATCAACAGGAACAGCAGAGTGCTGTGGATGTTGACGATGGTCATTTTGTCAACATAGAGCTAGAGTAA-
-------------------
>A/swine/Wisconsin/A01104099/2017/1-982
-------------------------ATGAGTCTTCTAACCGAGGTCGAAACGTACGTTCTTTCTATCATACC
GTCAGGCCCCCTCAAAGCCGAGATTGCGCAGAGACTGGAAAGTGTCTTTGCAGGAAAGAATACAGACCTTGA
GGCTCTCATGGAATGGCTAAAGACAAGACCAATCTTGTCACCTTTGACTAAGGGAATTTTAGGATTTGTGTT
CACGCTCACCGTGCCCAGTGAGCGAGGACTGCAGCGTAGACGCTTTGTCCAAAATGCCCTGAATGGGAATGG
GGACCCAAACAACATGGATAGAGCAGTTAAACTATACAAGAAGCTCAAAAGAGAAATAACGTTCCATGGGGC
CAAGGAGGTGTCACTAAGCTATTCAACTGGTGCACTTGCCAGTTGCATGGGCCTCATATACAACAGGATGGG
AACAGTGACCACAGAAGCTGCTTTTGGTCTAGTGTGTGCCACTTGTGAACAGATTGCTGATTCACAGCATCG
GTCTCACAGACAGATGGCTACAACCACCAATCCACTAATCAGGCATGAGAACAGAATGGTGCTGGCTAGCAC
TACGGCAAAGGCTATGGAACAGATGGCTGGATCAAGTGAACAGGCAGCGGAGGCCATGGAGATTGCTAATCA
GACTAGGCAGATGGTACATGCAATGAGAACTATTGGGACTCATCCTAGTTCCAGTACTGGTCTGAAAGATGA
CCTTCTTGAAAATTTGCAGGCCTATCAGAAACGAATGGGAGTGCAGATGCAGCGGTTTAAGTGATCCACTCG
CCATTGCAGCAAATATCATCGGGATCTTGCACCTGATATTGTGGATTACTGATCGTCTTTTTTTCAAATGTA
TTTATCGTCGCTTTAAATACGGTTTGAAAAGAGGGCCTTCTACGGAAGGAGTGCCTGAGTCCATGAGGGAAG
AATATCAACAGGAACAGCAGAGTGCTGTGGATGTTGACGATGGTCATTTTGTCAACATAGAGCTGGAGTAA-
-------------------
>A/swine/Iowa/A02214242/2017/1-982
-------------------------ATGAGTCTTCTAACCGAGGTCGAAACGTACGTTCTTTCTATCATCCC
GTCAGGCTCCCTCAAAGCCGAGATCGCGCAGAGACTGGAAAGTGTTTTTTCAGGAAAGAACGCAGATCTTGA
GGCTCTCATGGAATGGCTAAAGACAAGACCAATCTTGTCACCTCTGACTAAGGGGATTTTAGGATTTGTGTT
CACGCTCACCGTGCCCAGTGAGCGAGGACTGCAGCGTAGACGCTTTGTCCAAAATGCCCTAAATGGGAATGG
GGACCCGAACAACATGGATAGAGCAGTTAAACTATACAAGAAGCTCAAAAGAGAAATAACGTTCCATGGGGC
CAAAGAGGTGTCACTAAGCTATTCAACTGGTGCACTTGCCAGTTGCATGGGCCTCATATACAACAGAATGGG
AACAGTGACCACAGAAGCTGCTTTTGGTCTAGTGTGTGCCACTTGTGAACAGATTGCTGATTCACAGCATCG
GTCTCACAGACAAATGGCTACTACCACCAATCCACTAATCAGGCATGAAAACAGAATGGTGCTGGCTAGCAC
TACTGCAAAGGCTATGGAACAGATGGCTGGATCGAGTGAACAGGCAGCAGAGGCCATGGAGGTTGCTAATCA
AACTAGGCAGATGGTACATGCAATGAGAACCATTGGGACTCATCCTAGCTCCAGTGCTGGTCTGAAAGATGA
CCTTCTTGAAAATTTGCAGGCCTACCAGAAGCGAATGGGAGTGCAGATGCAGCGATTCAAATGATCCTCTCG
TCATTGCAGCAAATATCATTGGGATCTTGCACCTGATATTGTGGATTACTGATCGTCTTTTCTTCAAATGTA
TTTATCGTCGCTTTAAATACGGTTTGAAAAGAGGGCCTTCTACGGAAGGAGTGCCTGAGTCCATGAGGGAAG
AATATCAACAGGAACAGCAGAGTGCTGTGGATGTTGACGATGGTCATTTTGTCAACATAGAGCTAGAGTAA-
-------------------
>A/swine/Illinois/A02214663/2017/1-982
-------------------------ATGAGTCTTCTAACCGAGGTCGAAACGTACGTCCTTTCTATCATACC
GTCAGGCCCCCTCAAAGCCGAGATCGCGCAGAGACTGGAAAGTGTCTTTGCAGGAAAGAACACAGATCTTGA
GGCTCTCATGGAATGGCTAAAGACAAGACCAATCTTGTCACCTCTGACTAAAGGAATTTTAGGATTTGTGTT
CACGCTCACCGTGCCCAGTGAGCGAGGACTGCAGCGTAGACGCTTTGTCCAAAATGCCCTAAATGGGAATGG
GGACCCAAACAACATGGATAGAGCAGTCAAACTATACAAGAAGCTCAAAAGAGAAATAACGTTCCATGGGGC
CAAGGAGGTGTCACTAAGCTATTCAACTGGTGCACTTGCCAGTTGCATGGGCCTCATATACAACAGGATGGG
AACAGTGACCACTGAAGCTGCATTTGGTCTAGTGTGTGCCACTTGTGAACAGATTGCTGATTCTCAGCATCG
GTCTCACAGACAGATGGCTACTACCACCAATCCACTAATCAGGCATGAGAACAGAATGGTGCTAGCTAGCAC
TACGGCAAAGGCTATGGAACAGATGGCTGGATCGAGTGAACAGGCAGCGGAGGCCATGGAGGTTGCTAATCA
GACTAGGCAGATGGTACATGCAATGAGAACTATTGGGACTCATCCTAGCTCTAGTACTGGTCTGAAAGATGA
CCTTCTTGAAAATTTGCAGGCCTACCAAAAGCGAATGGGAGTGCAGATGCAGCGGTTCAAGTGATCATCTCG
CCATTGCAGCAAATATCATTGGGATCTTGCACCTGATATTGTGGATTACTGATCGTCTTTTTTTCAAATGTA
TTTATCGTCGCTTTAAATACGGTTTGAAAAGAGGGCCTTCTACGGAAGGAGTGCCTGAGTCAATGAGGGAAG
AATATCAACAGGAACAGCAGAATGCTGTGGATGTTGACGATGGTCATTTTGTCAACATAGAGCTAGAGTAA-
-------------------
>A/swine/Oklahoma/A02218159/2017/1-982
-------------------------ATGAGTCTTCTAACCGAGGTCGAAACGTACGTTCTTTCTATCATACC
GTCAGGCCCCCTCAAAGCCGAGATCGCGCAGAGACTGGAAAGTGTCTTTGCAGGAAAGAATACAGACCTTGA
GGCTCTCATGGAATGGCTAAAGACAAGACCAATCTTGTCACCTTTGACTAAGGGAATTTTAGGATTTGTGTT
CACGCTCACCGTGCCCAGTGAGCGAGGACTGCAGCGTAGACGCTTTGTCCAAAATGCCCTGAATGGGAATGG
GGACCCAAACAACATGGATAGAGCAGTTAAACTATACAAGAAGCTCAAAAGAGAAATAACGTTCCATGGGGC
CAAGGAGGTGTCACTAAGCTATTCAACTGGTGCACTTGCCAGTTGCATGGGCCTCATATACAACAGGATGGG
AACAGTGACCACAGAAGCTGCTTTTGGTCTAGTGTGTGCCACTTGTGAACAGATTGCTGACTCACAGCATCG
GTCTCACAGACAGATGGCTACAACCACCAATCCACTAATCAGGCATGAGAACAGAATGGTGCTGGCTAGCAC
TACGGCAAAGGCTATGGAACAGATGGCTGGATCGAGTGAACAGGCAGCGGAGGCCATGGAGGTTGCCAATCA
GACTAGGCAGATGGTACATGCAATGAGAACTATTGGGACTCATCCTAGTTCCAGTACTGGTCTGAAAGATGA
CCTTCTTGAAAATTTGCAGGCCTATCAGAAACGAATGGGAGTGCAGATGCAGCGGTTTAAGTGATCCTCTCG
CCATTGCAGCAAATATCATTGGGATCTTGCACCTGATATTGTGGATTACTGATCGTCTTTTTTTCAAATGTA
TTTATCGTCGCATTAAATACGGTTTGAAAAGAGGGCCTTCTACGGAAGGAGTGCCTGAGTCCATGAGGGAAG
AATATCAACAGGAACAGCAGAGTGCTGTGGATGTTGACGATGGTCATTTTGTCAACATAGAGCTGGAGTAA-
-------------------
>A/swine/Iowa/A01667087/2017/1-982
-------------------------ATGAGTCTTCTAACCGAGGTCGAAACGTACGTTCTCTCTATCATCCC
GTCAGGCCCCCTCAAAGCCGAGATCGCGCAGAGACTGGAAAGTGTCTTTGCAGGAAAGAACACAGATCTTGA
GGCTCTCATGGAATGGCTAAAGACAAGACCAATCTTGTCACCTCTGACTAAGGGAATTTTAGGATTTGTGTT
CACGCTCACCGTGCCCAGTGAGCGAGGACTGCAGCGTAGACGCTTTGTCCAAAATGCCCTAGATGGGAATGG
GGACCCAAACAACATGGATAGAGCAGTTAAACTGTACAAGAAGCTCAAAAGAGAAATAACATTCCATGGGGC
AAAGGAGGTGTCACTAAGCTATTCAACAGGTGCTCTTGCCAGTTGCATGGGCCTCATATACAACAGGATGGG
AACAGTGACCACAGAAGCTGCTTTTGGTTTAGTGTGTGCCATTTGTGAACAGATTGCTGATTCACAGCATCG
GTCTCACAGACAAATGGCTACTACCACCAATCCACTAATCAGACATGAAAACAGAATGGTGCTGGCTAGCAC
TACGGCAAAGGCTATGGAACAGATGGCTGGATCGAGTGAACAGGCAGCAGAGGCCATGGAGGTTGCTAATCA
GACTAGGCAGATGATACATGCGATGAGAACTATTGGGACTCATCCTAGCTCCAGTGCTGGTCTGAAAGATGA
TCTTCTTGAAAATTTGCAGGCCTACCAGAAGCGAATGGGAGTGCAGATGCAGCGATTCAAGTGATCCTCTCG
TCATTGCAGCAAATATCATTGGGATCTTGCACCTGATATTGTGGATCACTGATCGTCTTTTTTTCAAATTTA
TTTATCGTCGCTTTAAATACGGTTTGAAAAGAGGGCCTTCTACAGAAGGAGTGCCTGAGTCCATGAGGGAAG
AATATCAACAGGAGCAGCAGAGTGCTGTGGATGTTGACGATGGTCATTTTGCCAACATAGAGCTAGAGTAA-
-------------------
>A/swine/North_Carolina/A02214000/2017/1-982
-------------------------ATGAGTCTTCTAACCGAGGTCGAAACGTACGTTCTTTCTATCATCCC
GTCAGGCTCCCTCAAAGCCGAGATCGCGCAGAGACTGGAAAGTGTTTTCTCAGGAAAGAACACAGATCTTGA
GGCTCTCATGGAATGGCTAAAGACAAGACCAATCTTGTCACCTCTGACTAAGGGGATTTTAGGATTTGTGTT
CACGCTCACCGTGCCCAGTGAGCGAGGACTGCAGCGTAGACGCTTTGTCCAAAATGCCCTAAATGGGAATGG
GGACCCGAACAACATGGATAGAGCAGTTAAACTATACAAGAAGCTCAAAAGAGAAATAACGTTCCATGGGGC
CAAGGAGGTGTCACTAAGCTATTCAACTGGTGCACTTGCCAGTTGCATGGGCCTCATATACAACAGGATGGG
AACAGTGACCACAGAAGCTGCCTTTGGTCTGGTGTGTGCCACTTGTGAACAGATTGCTGATTCACAGCATCG
GTCTCACAGACAAATGGCTACTACCACCAATCCACTAATCAGACATGAAAACAGAATGGTGCTGGCTAGCAC
TACGGCAAAGGCTATGGAACAAATGGCTGGATCGAGTGAACAGGCAGCAGAGGCCATGGAGGTTGCTAGTCA
AACTAGGCAGATGGTACATGCAATGAGAACTATTGGGACTCATCCTAGCTCCAGTGCTGGTCTGAAAGATGA
CCTTCTTGAAAATTTGCAGGCCTACCAGAAGCGAATGGGAGTGCAGATGCAGCGATTCAAGTGACCCTCTCG
TCATCGCAGCAAATATCATTGGGATCTTGCACCTGATATTGTGGATTACTGATCGTCTTTTTTTCAAATGTA
TTTATCGTCGCTTTAAATACGGTTTGAAAAGAGGGCCTTCTACGGAAGGAGTGCCTGAGTCCATGAGGGAAG
AATATCAACAGGAACAGCAGAGTGCTGTGGATGTTGACGATGGTCATTTTGTCAACATAGAGCTAGAGTAA-
-------------------
>A/swine/Missouri/A01667102/2017/1-982
-------------------------ATGAGTCTTCTGACCGAGGTCGAAACGTACGTTCTTTCTATCATCCC
GTCCGGCCCCCTCAAAGCCGAGATCGCACAGAGACTGGAAAGTGTCTTTGCAGGAAAGAACACAGATCTTGA
GGCCCTCATGGAATGGCTAAAGACAAGACCAATCTTGTCACCTCTGACTAAGGGGATTTTAGGATTTGTGTT
CACGCTCACCGTGCCCAGTGAGCGAGGACTGCAGCGTAGACGCTTTGTCCAAAATGCCCTAAATGGAAATGG
GGACCCGAACAACATGGATAGAGCAGTTAAGCTATACAAGAAGCTCAAAAGAGAAATAACATTCCATGGGGC
CAAGGAGGTGTCACTAAGCTATTCAACTGGTGCACTTGCCAGTTGCATGGGCCTCATATACAACAGGATGGG
AACAGTAACCACAGAAGCTGCTTTTGGTCTAGTGTGTGCCACTTGTGAACAGATTGCTGATTCACAGCATCG
GTCTCACAGACAAATGGCTACTACCACCAATCCACTGATCAGGCATGAAAACAGGATGGTGCTGGCTAGCAC
TACGGCAAAGGCTATGGAACAGATGGCTGGATCGAGTGAGCAGGCAGCAGAGGCCATGGAGGTTGCTAATAA
AACTAGGCAGATGGTACATGCAATGAGAACTATTGGGACTCATCCTAGCTCCAGTGCTGGTCTGAAAGATGA
TCTTCTTGAAAATTTGCAGGCCTACCAGAAGCGAATGGGAGTGCAAATGCAGCGATTCAAATGATCCTCTCG
TCATTGCAGCAAATATCATTGGGATCTTGCACCTGATATTGTGGATTTCTGATCGTCTTTTTTTCAAATGTG
TTTATCGTCACTTTAAATACGGTTTGAAAAGAGGGCCTTCTACAGAAGGAGTGCCTGAGTCCATGAGGGAAG
AATATCAACAGGAACAGCAGAGTTCTGTGGATGTTGACGATGGTCATTTTGTCAACATAGAGCTAGAGTAA-
-------------------
>A/swine/North_Carolina/A01667104/2017/1-982
-------------------------ATGAGTCTTCTAACCGAGGTTGAAACGTACGTTCTGTCTATCATTCC
GTCAGGCCCCCTCAAAGCCGAGATCGCGCAGAGACTGGAAAGTGTCTTTGCAGGAAAGAACACAGATCTTGA
GGCTCTCATGGAATGGCTAAAGACAAGACCAATCTTGTCACCTCTGACTAAGGGAATTTTAGGATTTGTGTT
CACGCTCACCGTGCCCAGTGAGCGAGGACTGCAGCGTAGACGCTTTGTCCAGAATGCCCTGAATGGAAATGG
GGACCCAAACAACATGGATAGAGCAGTTAAACTATACAAGAAGCTCAAAAGAGAAATAACGTTCCATGGGGC
AAAGGAGGTGTCACTTAGCTATTCAACTGGTGCACTTGCCAGTTGCATGGGCCTCATATACAACAGGATGGG
AACAGTGACCACAGAAGCTGCTTTTGGTCTAGTGTGTGCCACTTGTGAACAGATTGCTGATTCACAGCATCG
GTCTCACAGACAGATGGCTACTACCACCAATCCACTAATTAGGCATGAGAACAGAATGGTGCTGGCTAGCAC
TACAGCAAAGGCTATGGAACAGATGGCTGGATCGAGTGAACAGGCAGCGGAGGCCATGGAGGTTGCTAATCA
GACTAGGCAGATGGTACATGCAATGAGAACTATTGGGACTCATCCTAGCTCCAGTACTGGTCTGAAAGATGA
CCTTCTTGAAAATTTGCAGGCCTACCAGAAGCGAATGGGAGTGCAGATGCAGCGATTCAGGTGATCCTCTCG
CCATTGCAGCAAATATCATTGGGATCTTGCACCTGATATTGTGGATTACGGATCGTCTTTTTTTCAAATGCA
TTTATCGTCGCTTTAAATACGGTTTGAAAAGAGGGCCTTCTACGGAAGGAGTGCCTGAGTCCATGAGGGAAG
AATATCAACAGGAACAGCAGAGTGCTGTGGATGTTGACGATGGTCATTTTGTCAACATAGAGCTAGAGTAA-
-------------------
>A/swine/Illinois/A02214664/2017/1-982
-------------------------ATGAGTCTTCTAACCGAGGTCGAAACGTACGTTCTTTCTATCATACC
GTCAGGCCCCCTCAAAGCCGAGATCGCGCAGAGACTGGAAAGTGTCTTTGCAGGAAAGAATACAGACCTTGA
GGCTCTCATGGAATGGCTAAAGACAAGACCAATCTTGTCACCTTTGACTAAGGGAATTTTGGGATTTGTGTT
CACGCTCACCGTGCCCAGTGAGCGAGGACTGCAGCGTAGACGCTTTGTCCAAAATGCCCTGAATGGGAATGG
GGACCCAAACAACATGGATAGAGCAGTTAAACTATACAAGAAGCTCAAAAGAGAAATAACATTCCATGGGGC
CAAGGAGGTGTCACTAAGCTATTCAACTGGTGCACTTGCCAGTTGCATGGGCCTCATATACAACAGGATGGG
AACAGTGACCACAGAAGCTGCTTTTGGTCTAGTGTGTGCCACTTGTGAACAGATTGCTGATTCACAGCATCG
GTCTCACAGACAGATGGCTACAACCACCAATCCACTAATCAGGCATGAGAACAGAATGGTGCTGGCTAGCAC
TACGGCAAAGGCTATGGAACAGATGGCTGGATCGAGTGAACAGGCAGCGGAGGCCATGGAGGTTGCTAATCA
GACTAGGCAGATGGTACATGCAATGAGAACTATTGGGACTCATCCTAGTTCCAGTACTGGTCTGAAAGATGA
CCTTCTTGAAAATTTGCAGGCCTATCAGAAGCGAATGGGAGTGCAGATGCAGCGGTTTAAGTGATCCTCTCG
CCATTGCAGCAAATATCATTGGGATCTTGCACCTGATATTGTGGATTACTGATCGTCTTTTTTTCAAATGTA
TTTATCGTCGCTTTAAATACGGTTTGAAAAGAGGGCCTTCTACGGAAGGAGTGCCTGAGTCCATGAGGGAAG
AATATCAACAGGAACAGCAGAGTGCTGTGGATGTTGACGATGGTCATTTTGTCAACATAGAGCTGGAGTAA-
-------------------
>A/swine/Minnesota/A02214666/2017/1-982
-------------------------ATGAGTCTTCTAACCGAGGTCGAAACGTACGTTCTTTCTATCATCCC
GTCAGGCCCCCTCAAAGCCGAGATCGCGCAGAGACTGGAAAGTGTATTTGCAGGAAAGAACACAGATCTTGA
GGCTCTCATGGAATGGCTAAAGACAAGACCAATCTTGTCACCTTTGACTAAGGGAATTTTAGGATTTGTGTT
CACGCTCACCGTGCCCAGTGAGCGAGGACTGCAGCGTAGACGATTTGTCCAAAATGCCCTAAATGGAAATGG
GGACCCGAACAACATGGATAGAGCAGTTAAACTATACAAGAAGCTCAAAAGAGAAATAACATTCCATGGGGC
TAAGGAGGTGTCACTAAGCTATTCAACTGGTGCACTTGCCAGTTGCATGGGCCTCATATACAATAGGATGGG
AACAGTGACCACAGAAGCTGCTTTTGGTCTAGTGTGTGCCACTTGTGAACAGATTGCTGATTCACAGCATCG
ATCTCACAGACAAATGGCTACTACCACCAATCCACTAATCAGGCATGAAAACAGAATGGTGTTGGCTAGCAC
TACTGCAAAGGCTATGGAACAGATGGCTGGATCGAGTGAACAGGCAGCAGAGGCCATGGAGGTTGCTAATCA
GACTAGGCAGATGGTACATGCAATGAGAACTATTGGGACTCATCCTAGCTCCAGTGCTGGTCTGAAGGATGA
CCTTCTTGAAAATTTACAGGCCTACCAGAAGCGAATGGGAGTGCAAATGCAGCGATTCAAGTGATCCTCTCG
TCATTGCAGCGAATATCATTGGGATCTTGCACCTGATATTGTGGATTACTGATCGTCTTTTTTTCAAATGTA
TCTATCGTCGCTTTAAATACGGATTGAAAAGAGGGCCTTCTACAGAAGGAGTGCCTGAGTCCATGAGGGAAG
AATATCAACAGGAACAGCAGAGTGCTGTGGATGTTGACGATGGTCATTTTGTCAACATAGAGCTAGAGTAA-
-------------------
>A/swine/Minnesota/A01667100/2017/1-982
-------------------------ATGAGTCTTCTAACCGAGGTCGAAACGTACGTTCTTTCTATCATCCC
ATCAGGCCCCCTCAAAGCCGAGATCGCGCAGAGACTGGAAAGTGTATTTGCAGGAAAGAACACAGATCTTGA
GGCTCTCATGGAATGGCTAAAGACAAGACCAATCTTGTCACCTCTGACTAAAGGAATTTTAGGATTTGTGTT
CACGCTCACCGTGCCCAGTGAGCGAGGACTGCAGCGTAGACGCTTTGTCCAAAATGCCCTAAATGGGAATGG
GGACCCGAACAACATGGATAGAGCAGTTAAACTATACAAGAAGCTCAAAAGAGAAATAACGTTCCATGGGGC
TAAGGAGGTGTCACTAAGCTATTCAACTGGTGCACTTGCCAGTTGCATGGGCCTCATATACAACAGGATGGG
AACAGTGACCACAGAAGCTGCTTTTGGTCTAGTGTGTGCCACTTGTGAACAGATTGCTGATTCACAGCATCG
ATCTCACAGACAAATGGTTGCTACCACCAATCCACTAATCAGGCATGAAAACAGAATGGTGCTGGCTAGCAC
TACTGCAAAGGCTATGGAACAGATGGCTGGATCGAGTGAACAGGCAGCAGAGGCCATGGAGGTTGCTAATCA
GACTAGGCAGATGGTACATGCAATGAGAACTATTGGGACTCATCCTAGCTCCAGTGCTGGTCTGAAGGATGA
CCTTCTTGAAAATTTACAGGCCTACCAGAAGCGAATGGGAGTGCAAATGCAGCGATTCAAGTGATCCTCTCG
TCATTGCAGCAAATATCATTGGGATCTTGCACCTGATATTGTGGATTACTGATCGTCTTTTTTTCAAATGTA
TTTATCGTCGCTTTAAATACGGTTTGAAAAGAGGGCCTCCTACAGAAGGAGTGCCTGAGTCCATGAGGGAAG
AATATCAACAGGAACAGCAGAGTGCTGTGGATGTTGACGATGGTCATTTTGTCAACATAGAGCTAGAGTAA-
-------------------
>A/swine/Ohio/A02214229/2017/1-982
-------------------------ATGAGTCTTCTAACCGAGGTCGAAACGTACGTTCTTTCTATCGTCCC
GTCAGGCCCCCTCAAAGCCGAGATCGCGCAGAGACTGGAAAGTGTCTTTGCAGGAAAGAACACAGATCTTGA
GGCTCTAATGGAATGGCTAAAGACAAGACCAATCTTGTCACCTCTGACTAAGGGAATTTTAGGGTTTGTGTT
CACGCTCACCGTGCCCAGTGAGCGAGGACTGCAGCGTAGACGCTTTGTCCAAAATGCCCTAAATGGGAATGG
GGACCCAAACAACATGGATAGAGCAGTTAAACTATACAAGAAGCTCAAAAGAGAAATAACGTTCCATGGGGC
CAAGGAGGTGTCGCTAAGCTATTCAACTGGTGCACTTGCCAGTTGCATGGGCCTCATATACAACAGGATGGG
AACAGTGACCACAGAAGCTGCTTTTGGCCTAGTGTGTGCCACTTGTGAACAGATTGCTGATTCACAGCATCG
GTCACACAGACAAATGGCTACTACTACCAATCCATTAATCAGGCATGAAAACAGAATGGTTCTGGCTAGCAC
TACGGCAAAGGCGATGGAACAGATGGCTGGATCGAGTGAACAGGCAGCAGAGGCCATGGAGATTGCTAATCA
GACTAGGCAGATGGTGCATGCAATGAGAACTATTGGGACTCATCCTAGTTCCAGTGCTGGTCTGAAAGATGA
CCTCCTTGAAAATTTGCAGGCCTACCAGAAGCGGATGGGAGTGCAGATGCAGCGATTCAAGTGATCCTCTCG
TCATTGCAGCAAGTATCATTGGGATCTTGCACCTGATATTGTGGATTACTGATCGTCTTTTTTTCAAATGCA
TTTATCGTCGCTTTAAATACGGTTTGAAAAGAGGGCCTTCTACGGAAGGAGTGCCTGAGTCCATGAGGGAAG
AATATCAACAGGAACAGCAGAGTGCTGTGGATGTTGACGATGGTCATTTTGTCAACATAGAGCTAGAGTAA-
-------------------
>A/swine/Pennsylvania/A01933903/2017/1-982
-------------------------ATGAGTCTTCTAACCGAGGTCGAAACGTACGTTCTGTCTATCATCCC
GTCAGGCCCCCTCAAAGCCGAGATCGCGCAGAGACTGGAAAGTGTCTTTGCAGGGAAGAACACAGATCTTGA
GGCCCTCATGGAATGGCTAAAGACAAGACCAATCTTGTCACCTCTGACTAAGGGAATTTTAGGATTTGTGTT
CACGCTCACCGTGCCCAGTGAGCGAGGACTGCAGCGTAGACGCTTTGTCCAAAATGCCCTGAATGGAAATGG
GGACCCAAACAACATGGATAGAGCAGTTAAACTATACAAGAAGCTCAAAAGAGAAATAACGTTCCATGGGGC
AAAGGAGGTGTCACTTAGCTATTCAACTGGTGCACTTGCCAGTTGCATGGGCCTCATATACAACAGGATGGG
AACAGTGACCACAGAAGCTGCTTTTGGTCTAGTGTGTGCCACTTGTGAACAGATTGCTGATTCACAGCATCG
GTCTCACAGACAGATGGCTATTACCACCAATCCACTAATTAGGCATGAGAACAGAATGGTGCTGGCTAGCAC
TACAGCAAAGGCTATGGAACAGATGGCTGGATCGAGTGAACAGGCAGCGGAGGCCATGGAGGTTGCTAATCA
GACTAGGCAGATGGTACATGCAATGAGAACTATTGGGACTCATCCTAGCTCCAGTACTGGTCTGAAAGATGA
CCTTCTTGAAAATTTGCAGGCCTACCAGAAGCGAATGGGAGTGCAGATGCAGCGATTCAAGTGATCCTCTCG
CCATTGCAGCCAATATCATTGGGATCTTGCACCTGATATTGTGGATTACTGATCGTCTTTTTTTCAAATGCA
TTTATCGTCGCTTTAAATACGGTTTGAAAAGAGGGCCTTCTACGGAAGGAGTGCCTGAGTCCATGAGGGAAG
AATATCAACAGGAACAGCAGAGTGCTGTGGATGTTGACGATGGTCATTTTGTCAACATAGAGCTAGAGTAA-
-------------------
>A/swine/Iowa/A01667091/2017/1-982
-------------------------ATGAGTCTTCTAACCGAGGTCGAAACGTACGTTCTTTCTATCATCCC
GTCAGGCTCCCTCAAAGCCGAGATCGCACAGAGACTGGAAAGTGTTTTTTCAGGAAAGAACACAGATCTTGA
GGCTCTCATGGAATGGCTAAAGACAAGACCAATCTTGTCGCCTCTGACTAAGGGGATTTTAGGATTTGTGTT
CACGCTCACCGTGCCCAGCGAGCGAGGACTGCAGCGTAGACGCTTTGTCCAAAATGCCCTAAATGGGAATGG
GGATCCGAACAACATGGATAGAGCAGTTAAACTATACAAGAAGCTCAAAAGAGAGATAACGTTCCATGGGGC
CAAGGAGGTGTCACTAAGCTATTCAACTGGTGCACTTGCCAGTTGCATGGGCCTCATATACAACAGGATGGG
AACAGTGACCACAGAAGCTGCTTTTGGGCTGGTGTGTGCCACTTGTGAACAGATTGCTGATTCACAGCATCG
GTCTCACAGACAAATGGCTACTACCACCAATCCACTAATCAGGCATGAAAACAGAATGGTGCTGGCTAGCAC
TACGGCAAAGGCTATGGAACAGATGGCTGGATCGAGTGAACAGGCAGCAGAGGCCATGGAGGTTGCTAATCA
AACTAGGCAGATGGTACATGCAATGAGAACTATTGGGACTCATCCTAGCTCCAGTGCTGGTCTTAAAGATGA
CCTTCTTGAAAATTTGCAGGCCTACCAGAAGCGAATGGGGGTGCAGATGCAGCGATTCAAGTGATCCTCTCG
TCATTGCAGCAAATATCATTGGGATTTTGCACCTGATATTGTGGATTACTGATCGTCTTTTCTTCAAATGTA
TTTATCGTCGCTTTAAATACGGTTTGAAAAGAGGGCCTTCTACGGAAGGAGTGCCTGAGTCCATGAGGGAAG
AATATCAACAGGAACAGCAGAATGCTGTGGATGTTGACGATGGTCATTTTGTCAACATAGAGCTAGAGTAA-
-------------------
>A/swine/South_Carolina/A02214849/2017/1-982
-------------------------ATGAGTCTTCTAACCGAGGTCGAAACGTACGTTCTTTCTATCATACC
GTCAGGCCCCCTCAAAGCCGAGATCGCGCAGAGATTTGAAAGTGTTTTTGCGGGAAAGAACACAGACCTTGA
GGCTCTCATGGAATGGCTGAAGACAAGACCTATCTTGTCACCTCTGACTAAGGGAATTCTAGGATTTGTGTT
CACGCTCACCGTGCCCAGTGAGCGAGGACTGCAGCGTAGACGCTTTGTCCAAAATGCCCTAAATGGGAATGG
GGACCCGAACAACATGGATAGAGCAGTTAAACTATACAAGAAGCTCAAAAGAGAAATAACGTTTCATGGGGC
CAAGGAGGTGTCACTAAGCTATTCAACTGGTGCACTTGCCAGTTGCATGGGCCTCATATACAACAGGATGGG
AACAGTGACCACAGAAGCTGCTTTGGGTCTAGTGTGTGCCACTTGTGAACAGATTGCTGATTCACAGCATCG
GTCTCACAGACAGATGGCTACTACCACCAACCCACTAATCAGGCATGAGAACAGAATGGTGCTGGCTAGCAC
TACGGCAAAGGCTATGGAACAAATGGCTGGATCAAGTGAACAGGCAGCGGAGGCCATGGAGGTTGCTAATCA
TACTAGGCAGATGGTACATGCAATGAGAACTATTGGGACTCATCCTAGCTCCAGTGCTGGTCTGAAAGATGA
CCTTCTTGAAAATTTGCAGGCCTACCAGAAGCGAATGGGTGTGCAGATGCAGCGATTCAAGTGATCCTCTCG
TCATTGCAGCAAATATCATTGGGATCTTGCACCTGATATTGTGGATTGCTGATCGTCTTTTTTTCAAATGTA
TTTATCGTCGCTTTAAATACGGTTTGAAAAGAGGGCCCTCTACGGAAGGAGTGCCTAAGTCCATGAGGGAAG
AATATCAACAGGAACAGCAGAATGCTGTGGATGTTGACGATGGTCATTTTGTCAACATAGAGCTAGAGTAA-
-------------------
>A/swine/Iowa/A01667088/2017/1-982
-------------------------ATGAGTCTTCTAACCGAGGTCGAAACGTACGTTCTTTCTATCATCCC
GTCAGGCCCCCTCAAAGCCGAGATCGCGCAGAGACTGGAAAGTGTATTTGCAGGAAAGAACACAGATCTTGA
GGCTCTCATGGAATGGCTAAAGACAAGACCAATCTTGTCACCTCTGACTAAGGGAATTTTAGGATTTGTGTT
CACGCTCACCGTGCCCAGTGAGCGAGGACTGCAGCGTAGACGCTTTGTCCAAAATGCCCTAAATGGGAATGG
GGACCCGAACAACATGGATAGAGCAGTTAAACTATACAAGAAGCTCAAAAGAGAAATAACGTTCCATGGGGC
TAAGGAGGTGTCACTAAGCTATTCAACTGGTGCACTTGCCAGTTGCATGGGCCTCATATACAACAGGATGGG
AACAGTGACCACAGAAGCTGCTTTTGGTCTAGTGTGTGCCACCTGTGAACAGATTGCTGATTCACAGCATCG
ATCTCACAGACAAATGGTTACTACCACCAATCCACTAATCAGGCATGAAAACAGAATGGTGCTGGCTAGCAC
TACTGCAAAGGCTATGGAACAGATGGCTGGATCGAGTGAACAGGCAGCAGAGGCCATGGAGGTTGCTAATCA
GACTAGGCAGATGGTACATGCAATGAGAACTATTGGGACTCATCCTAGCTCCAGTGCTGGTCTGAAGGATGA
CCTTCTTGAAAATTTACAGGCCTACCAGAAGCGAATGGGAGTGCAAATGCAGCGATTCAAGTGATCCTCTCG
TCATTGCAGCAAATATCATTGGGATCTTGCACCTGATATTGTGGATTACTGATCGTCTTTTTTTCAAATGTA
TTTATCGTCGCTTTAAATACGGTTTGAAAAGAGGGCCTCCTACAGAAGGAGTGCCTGAGTCCATGAGGGAAG
AATATCAACAGGAACAGCAGAGTGCTGTGGATGTTGACGATGGTCATTTTGTCAACATAGAGCTAGAGTAA-
-------------------
>A/swine/Oklahoma/A02218157/2017/1-982
-------------------------ATGAGTCTTCTAACCGAGGTCGAAACGTACGTTCTTTCTATCATACC
GTCAGGCCCCCTCAAAGCCGAGATCGCGCAGAGACTGGAAAGTGTCTTTGCAGGAAAGAATACAGACCTTGA
GGCTCTCATGGAATGGCTAAAGACAAGACCAATCTTGTCACCTTTGACTAAGGGAATTTTAGGATTTGTGTT
CACGCTCACCGTGCCCAGTGAGCGAGGACTGCAGCGTAGACGCTTTGTCCAAAATGCCCTGAATGGGAATGG
GGACCCAAACAACATGGATAGAGCAGTTAAACTATACAAGAAGCTCAAAAGAGAAATAACGTTCCATGGGGC
CAAGGAGGTGTCACTAAGCTATTCAACTGGTGCACTTGCCAGTTGCATGGGCCTCATATACAACAGGATGGG
AACAGTGACCACAGAAGCTGCTTTTGGTCTAGTGTGTGCCACTTGTGAACAGATTGCTGACTCACAGCATCG
GTCTCACAGACAGATGGCTACAACCACCAATCCACTAATCAGGCATGAGAACAGAATGGTGCTGGCTAGCAC
TACGGCAAAGGCTATGGAACAGATGGCTGGATCGAGTGAACAGGCAGCGGAGGCCATGGAGGTTGCCAATCA
GACTAGGCAGATGGTACATGCAATGAGAACTATTGGGACTCATCCTAGTTCCAGTACTGGTCTGAAAGATGA
CCTTCTTGAAAATTTGCAGGCCTACCAGAAACGAATGGGAGTGCAGATGCAGCGGTTTAAGTGATCCTCTCG
CCATTGCAGCAAATATCATTGGGATCTTGCACCTGATATTGTGGATTACTGATCGTCTTTTTTTCAAATGTA
TTTATCGTCGCATTAAATACGGTTTGAAAAGAGGGCCTTCTACGGAAGGAGTGCCTGAGTCCATGAGGGAAG
AATATCAACAGGAACAGCAGAGTGCTGTGGATGTTGACGATGGTCATTTTGTCAACATAGAGCTGGAGTAA-
-------------------
>A/swine/Iowa/A01667086/2017/1-982
-------------------------ATGAGTCTCCTTACCGAGGTCGAAACGTACGTTCTTTCTATCATACC
GTCAGGCCCCCTCAAAGCCGAGATCGCGCAGAGACTGGAAAGTGTCTTTGCAGGAAAGAACACAGATCTTGA
GGCTCTCATGGAATGGCTAAAGACAAGACCAATCTTGTCACCTCTGACTAAGGGAATTTTGGGATTTGTGTT
CACGCTCACCGTGCCCAGTGAGCGAGGACTGCAGCGTAGACGCTTTGTCCAAAATGCCCTGAATGGGAATGG
GGACCCAAACAACATGGATAGAGCAGTTAAACTATACAAGAAGCTCAAAAGAGAAATAACATTCCATGGAGC
CAAGGAAGTGTCACTGAGCTATTCAACTGGTGCACTTGCCAGTTGCATGGGCCTCATATACAACAGGATGGG
AACAGTGACCACAGAAGCTGCTTTTGGTCTAGTGTGTGCCACTTGTGAACAGATTGCTGATTCACAGCATCG
GTCTCACAGACAAATGGCTACTACCACCAACCCACTAATAAGGCATGAGAACAGAATGGTGCTGGCTAGCAC
TACGGCAAAGGCTATGGAACAGATGGCTGGATCGAGTGAACAGGCAGCGGAGGCCATGGAGGTTGCTAATCA
GACTAGGCAGATGGTACATGCAATGAGAACTATTGGGACTCATCCTAGTTCCAGCACTGGTCTGAAAGATGA
TCTTCTTGAAAATTTGCAGGCCTACCAGAAGCGAATGGGAGTGCAAATGCAGCGTTTCAAGTGATCCTCTCG
CCATTGCAGCAAATATCATTGGGATCTTGCACCTGGTATTGTGGATTACTGATCGTCTTTTTTTCAAATGTA
TTTATCGTCGCTTTAGATACGGTTTGAAAAGAGGGCCTTCTACGGAAGGAGTGCCTGAGTCCATGAGGGAAG
AATATCAACAGGAACAGCAGAGTGCTGTGGATGTTGACGATGGTCATTTTGTCAACATAGAGCTAGAGTAA-
-------------------
>A/swine/Iowa/A01667095/2017/1-982
-------------------------ATGAGTCTTCTAACCGAGGTCGAAACGTACGTTCTTTCTATCATCCC
ATCAGGCTCCCTCAAAGCCGAGATCGCGCAGAGACTGGAAAGTGTTTTTTCAGGAAAGAACACAGATCTTGA
GGTTCTCATGGAATGGCTAAAGACAAGACCAATCTTGTCACCTCTGACTAAGGGGATTTTAGGATTTGTGTT
CACGCTCACCGTGCCCAGTGAGCGAGGACTGCAGCGTAGACGCTTTGTCCAAAATGCCCTAAATGGGAATGG
GGACCCGAACAACATGGATAGAGCAGTTAAACTATACAAGAAGCTCAAAAGAGAAATAACGTTCCATGGGGC
CAAGGAGGTGTCACTAAGCTATTCAACTGGTGCACTTGCCAGTTGCATGGGCCTCATATACAACAGGATGGG
AACAGTGACCACAGAAGCTGCTTTTGGTCTAGTGTGTGCCACTTGTGAACAGATTGCTGACTCACAGCATCG
GTCTCACAGGCAAATGGCTACTACCACCAATCCACTAATCAGGCATGAAAACAGAATGGTGCTGGCTAGCAC
TACGGCAAAGGCTATGGAACAGATGGCTGGATCGAGTGAACAGGCAGCAGAGGCCATGGAGGTTGCTAATCA
AACTAGGCAGATGGTACATGCAATGAGAACTATTGGGACTCATCCTAGCTCCAGTGCTGGTCTGAAAGATGA
CCTTCTTGAAAATTTGCAGGCCTACCAGAAGCGAATGGGAGTGCAGATGCAGCGATTCAAATGATCCTCTCG
TCATTGCAGCAAATATCATTGGGATCTTGCACCTGATATTGTGGATTACTGATCGTCTTTTTTTCAAATGTA
TTTATCGTCGCTTTAAATACGGTTTGAAAAGAGGGCCTTCTACGGAAGGAGTGCCTGAGTCCATGAGGGAAG
AATATCAACAGGAACAGCAGAGTGCTGTGGATGTTGACGATGGTCATTTTGTCAACATAGAGCTAGAGTAA-
-------------------
>A/swine/Nebraska/A01933901/2017/1-982
-------------------------ATGAGTCTTCTAACCGAGGTCGAAACGTACGTTCTTTCTATCATCCC
GTCAGGCTCCCTCAAAGCCGAGATCGCGCAGAGACTGGAAAGTGTTTTTTCAGGAAAGAACACAGATCTTGA
GGCTCTCATGGAATGGCTAAAGACAAGACCAATCTTGTCACCTCTGACTAAGGGGATTTTAGGATTTGTGTT
CACGCTCACCGTGCCCAGTGAGCGAGGACTGCAGCGTAGACGCTTTGTCCAAAATGCCCTAAATGGGAATGG
GGATCCGAACAACATGGATAGAGCAGTTAAACTATACAAGAAGCTCAAAAGAGAAATAACGTTCCATGGGGC
CAAGGAGGTGTCACTAAGCTATTCAACTGGTGCACTTGCCAGTTGCATGGGCCTCATATACAACAGGATGGG
AACAGTGACCACAGAAGCTGCTCTTGGTCTAGTGTGTGCCACTTGTGAACAGATTGCTGATTCACAGCATCG
GTCTCACAGACAGATGGCTACTACCACCAATCCACTAATCAGGCATGAAAACAGAATGGTGCTGGCTAGCAC
TACGGCAAAGGCTATGGAACAAATGGCTGGATCGAATGAACAGGCAGCAGAGGCCATGGAGGTTGCTAATCA
AACTAGGCAGATGGTACATGCAATGAGAACTATTGGGACTCACCCTAGCTCCAGTGCTGGTCTGAAAGATGA
CCTTCTTGAAAATTTGCAGGCCTACCAGAAGCGGATGGGAGTGCAGATGCAGCGATTCAAATGATCCTCTCG
TCATTGCAGCAAATATCATTGGGATCTTGCACCTGATATTGTGGATTACTGATCGTCTTTTTTTCAAATGTA
TTTATCGTCGCTTTAAATACGGTTTGAAAAGAGGGCCTTCTACGGAAGGAGTGCCTGAGTCCATGAGGGAAG
AATATCAACAGGAACGGCAGAGTGCTGTGGATGTTGACGATGGTCATTTTGTCAACATAGAGCTGGAGTAA-
-------------------
>A/swine/Ohio/A02214230/2017/1-982
-------------------------ATGAGTCTTCTGACCGAGGTCGAAACGTACGTTCTTTCTATCATCCC
GTCCGGCCCCCTCAAAGCCGAGATCGCACAGAGACTGGAAAGTGTCTTTGCAGGAAAGAACACAGATCTTGA
GGCCCTCATGGAATGGCTAAAGACAAGACCAATCTTGTCACCTCTGACTAAGGGGATTTTAGGATTTGTGTT
CACGCTCACCGTGCCCAGTGAGCGAGGACTGCAGCGTAGACGCTTTGTCCAAAATGCACTAAATGGAAATGG
GGACCCGAACAACATGGATAGAGCAGTCAAGCTATACAAGAAGCTCAAAAGAGAAATAACATTCCATGGGGC
CAAGGAGGTGTCACTAAGCTATTCAACTGGTGCACTTGCCAGTTGCATGGGCCTCATATACAACAGGATGGG
AACAGTAACCACAGAAGCTGCTTTTGGTCTAGTGTGTGCCACTTGTGAACAGATTGCTGATTCACAGCATCG
GTCTCACAGACAAATGGCTACTACCACCAATCCACTGATCAGGCATGAAAACAGGATGGTGCTGGCTAGCAC
TACGGCAAAGGCTATGGAACAGATGGCTGGATCGAGTGAGCAGGCAGCAGAGGCCATGGAGGTTGCTAATAA
GACTAGGCAGATGGTACATGCAATGAGAACTATTGGGACTCATCCTAGCTCCAGTGCTGGTCTGAAAGATGA
TCTTCTTGAAAATTTGCAGGCCTACCAGAAGCGAATGGGAGTGCAAATGCAGCGATTCAAATGATCCTCTCG
TCATTGCAGCAAATATCATTGGGATCTTGCACCTGATATTGTGGATTTCTGATCGTCTTTTTTTCAAATGTG
TTTATCGTCACTTTAAATACGGTTTGAAAAGAGGGCCTTCTACAGAAGGAGTGCCTGAGTCCATGAGGGAAG
AATATCAACAGGAACAGCAGAGTTCTGTGGATGTTGACGATGGTCATTTTGTCAACATAGAGCTAGAGTAA-
-------------------
>A/swine/North_Carolina/A02214438/2017/1-982
-------------------------ATGAGTCTTCTAACCGAGGTCGAAACGTACGTTCTTTCTATCATACC
GTCAGGCCCCCTCAAAGCCGAGATAGCGCAGAGACTGGAAAGTGTCTTCGCAGGAAAGAACACAGACCTTGA
GGCTCTCATGGAATGGCTAAAGACAAGACCAATCTTGTCACCTCTGACTAAGGGAATTTTAGGATTTGTGTT
CACGCTCACCGTGCCCAGTGAGCGAGGACTGCAGCGTAGACGCTTTGTCCAAAATGCCCTGAATGGGAATGG
GGACCCAAACAACATGGATAGAGCAGTTAAACTATACAAGAAGCTCAAAAGAGAAATAACGTTCCATGGGGC
CAAGGAGGTGTCACTAAGCTATTCAACTGGTGCACTTGCCAGTTGCATGGGCCTCATATACAACAGGATGGG
AACAGTGACCACAGAAGCTGCTTTTGGCCTAGTGTGTGCCACTTGTGAACAGATTGCTGATTCACAGCATCG
GTCTCACAGACAAATGGCCACAACCACCAATCCACTAATCAGGCATGAGAACAGAATGGTGCTGGCTAGCAC
TACGGCAAAGGCTATGGAACAGATGGCTGGATCGAGTGAACAGGCAGCGGAGGCCATGGAGGTTGCTAATCA
GACTAGGCAGATGGTACATGCCATGAGAACTATTGGGACTCATCCTAGCTCCAGTACTGGTCTGAAAGATGA
CCTTCTTGAAAATTTGCAGGCCTACCAGAAGCGAATGGGAGTGCAGATGCAGCGATTCAAGTGATCCTCTAG
CCATTACAGCAAATATCATCGGGATCTTGCACCTGACATTGTGGATTACTGATCGTCTTTTTTTCAAATGTA
TTTATCGTCGCTTTAAATACGGTTTGAAAAGAGGGCCTTCTACGGAAGGAGTGCCTGAGTCCATGAGGGAAG
AATATCAACAGGAACAGCAGAGTGCTGTGGATGTTGACGATGGTCATTTTGTCAACATAGAGCTAGAGTAA-
-------------------
>A/swine/Oklahoma/A02214419/2017/1-982
-------------------------ATGAGTCTTCTAACCGAGGTCGAAACGTACGTTCTTTCTATCATCCC
GTCAGGCTCCCTCAAAGCCGAGATCGCACAGAGACTGGAAAGTGTTTTTTCAGGAAAGAACACAGATCTTGA
GGCTCTCATGGAATGGCTAAAGACAAGACCAATCTTGTCACCTCTGACTAAGGGGATTTTAGGATTTGTGTT
CACGCTCACCGTGCCCAGCGAGCGAGGACTGCAGCGTAGACGCTTTGTCCAAAATGCCCTAAATGGGAATGG
GGATCCGAACAACATGGATAGAGCAGTTAAACTATACAAGAAGCTCAAAAGAGAGATAACGTTCCATGGGGC
CAAGGAGGTGTCACTAAGCTATTCAACTGGTGCACTTGCCAGTTGCATGGGCCTCATATACAACAGGATGGG
AACAGTGACCACAGAAGCTGCTTTTGGGCTGGTGTGTGCCACTTGTGAACAGATTGCTGATTCACAGCATCG
GTCTCACAGACAAATGGCTACTACCACCAATCCACTAATCAGGCATGAAAACAGAATGGTGCTGGCTAGCAC
TACGGCAAAGGCTATGGAACAGATGGCTGGATCGAGTGAACAGGCAGCAGAGGCCATGGAGGTTGCTAATCA
AACTAGGCAGATGGTACATGCAATGAGAACTATTGGGACTCATCCTAGCTCCAGTGCTGGTCTTAAAGATGA
CCTTCTTGAAAATTTGCAGGCCTACCAGAAGCGAATGGGGGTGCAGATGCAGCGATTCAAGTGATCCTCTCG
TCATTGCAGCAAATATCATTGGGATTTTGCACCTGATATTGTGGATTACTGATCGTCTTTTCTTCAAATGTA
TTTATCGTCGCTTTAAATACGGTTTGAAAAGAGGGCCTTCTACGGAAGGAGTGCCTGAGTCCATGAGGGAAG
AATATCAACAGGAACAGCAGAATGCTGTGGATGTTGACGATGGTCATTTTGTCAACATAGAGCTAGAGTAA-
-------------------
>A/swine/Iowa/A02214835/2017/1-982
-------------------------ATGAGTCTTCTAACCGAGGTCGAAACGTACGTTCTTTCTATCATCCC
GTCAGGCCCCCTCAAAGCCGAGATCGCACAGAGACTGGAAAGTGTCTTTGCAGGAAAGAACACAGATCTTGA
GGCTCTCATGGAATGGCTAAAGACAAGACCAATCTTGTCACCTCTGACTAAGGGAATTTTAGGATTTGTGTT
CACGCTCACCGTGCCCAGTGAGCGAGGACTGCAGCGTAGACGCTTTATCCAAAATGCCCTAAATGGAAATGG
GGATCCGAACAACATGGATAGAGCAGTTAAACTATACAAGAAGCTCAAAAGAGAAATAACGTTCCATGGGGC
CAAGGAGGTGTCACTAAGCTATTCAACTGGTGCACTTGCCAGTTGCATGGGTCTCATATACAACAGGATGGG
AACAGTGACCACAGAAGCTGCTTTTGGTCTAGTTTGTGCCACTTGTGAACAGATTGCTGATTCACAGCATCG
GTCTCACAGACAAATGGCTACTACCACCAATCCACTAATCAGGCATGAAAACAGAATGGTGCTGGCTAGCAC
TACGGCAAAGGCTATGGAACAGGTGGCTGGATCGAGTGAACAGGCAGCAGAGGCCATGGAGGTTGCTAATAA
GACTAGGCAGATGATACATGCAATGAGAACTATTGGGACTCATCCTAGTTCCAGTGCTGGTCTGAGAGATGA
CCTTCTTGAAAATTTGCAGGCCTACCAGAAGCGAATGGGAGTGCAGATGCAGCGGTTCAAGTGATCCTCTCG
TCATTGCAGCAAACATCATTGGGATCTTGCACCTGATATTGTGGATTACTGATCGTCTTTTTTTCAAATGCA
TTTATCGTCGCTTTAAATACGGTTTGAAAAGAGGGCCTTCTACGGAAGGAGTGCCTGAGTCCATGAGGGAAG
AATATCAACAGGAGCAGCAGAGTGCTGTGGATGTTGACGATGGTCATTTTGTCAACATAGAGCTAGAGTAA-
-------------------
>A/swine/Pennsylvania/A02214908/2017/1-982
-------------------------ATGAGTCTTCTAACCGAGGTCGAAACGTACGTTCTTTCTATCATACC
GTCAGGCCCCCTCAAAGCCGAGATCGCGCAGAGACTGGAAAGTGTCTTTGCAGGAAAGAACACGGATCTTGA
GGTTCTCATGGAATGGCTAAAGACAAGACCAATCTTGTCACCTCTGACTAAGGGAATTTTAGGATTTGTGTT
CACGCTCACCGTGCCCAGTGAGCGAGGACTGCAGCGTAGACGCTTTGTCCAAAATGCCCTGAATGGGAATGG
GGACCCAAACAACATGGATAGAGCAGTTAAACTATACAAGAAGCTCAAAAGAGAAATAACGTTCCATGGGGC
CAAGGAGGTGTCACTAAGCTATTCAACTGGTGCACTTGCCAGTTGCATGGGCCTCATATACAACAGGATGGG
AACAGTGACCACAGAAGCTGCTTTTGGTCTAGTGTGTGCCACTTGTGAACAGATTGCTGATTCACAGCATCG
GTCTCACAGACAAATGGCTACAACCACCAATCCACTAATCAGGCATGAGAACAGAATGGTTCTGGCTAGCAC
TACGGCAAAGGCTATGGAACAGATGGCTGGATCGAGTGAACAGGCAGCGGAGGCCATGGAGGTTGCTAATCA
GACTAGGCAGATGGTACATGCAATGAGAACTATTGGAACTCACCCTAGTTCCAGTACTGGTCTGAAAGATGA
CCTTCTTGAAAATTTGCAGGCCTACCAGAAGCGAATGGGAGTGCAGATGCAGCGATTCAAGTGATCCTCTCG
CCATTGCAGCAAATATCATTGGGATCTTGCACCTGACATTGTGGATTACTGATCGTCTTTTTTTCAAATGTA
TTTATCGTCGTTTTAAATACGGTTTGAAAAGAGGGCCTTCTACGGAAGGAGTGCCTGAGTCCATGAGGGAAG
AATATCAACAGGAACAGCAGAGTGCTGTGGATGTTGACGATGGTCATTTTGTCAACATAGAGCTAGAGTAA-
-------------------
>A/swine/Iowa/A02214497/2017/1-982
-------------------------ATGAGTCTTCTGACCGAGGTCGAAACGTACGTTCTTTCTATCATCCC
GTCAGGCCCCCTCAAAGCCGAGATCGCACAGAGACTGGAAAGTGTCTTTGCAGGAAAGAACACAGATCTTGA
GGCCCTCATGGAATGGCTAAAGACAAGACCAATCTTGTCACCTCTGACTAAGGGGATTTTAGGATTTGTGTT
CACGCTCACCGTGCCCAGTGAGCGAGGACTGCAGCGTAGACGCTTTGTCCAAAATGCCCTAAATGGAAATGG
GGACCCGAACAACATGGATAGAGCAGTTAAGCTATACAAGAAGCTCAAAAGAGAAATAACATTCCATGGGGC
CAAGGAGGTGTCACTAAGCTATTCAACTGGTGCACTTGCCAGTTGCATGGGCCTCATATACAACAGGATGGG
AACAGTAACCACAGAAGCTGCTTTTGGTCTAGTGTGTGCCACTTGTGAACAGATTGCTGATTCACAGCATCG
GTCTCACAGACAAATGGCTACTACCACCAATCCACTGATCAGGCATGAAAACAGGATGGTGCTGGCTAGCAC
TACAGCAAAGGCTATGGAACAGATGGCTGGATCGAGTGAGCAGGCAGCAGAGGCCATGGAGGTTGCTAATAA
GACTAGGCAGATGGTACATGCAATGAGAACTATTGGGACTCATCCTAGCTCCAGTGCTGGTCTGAAAGATGA
TCTTCTTGAAAATTTGCAGGCCTACCAGAAGCGAATGGGAGTGCAAATGCAGCGATTCAAATGATCCTCTCG
TCATTGCAGCAAATATCATTGGGATCTTGCACCTGATATTGTGGATTTCTGATCGTCTTTTTTTCAAATGTG
TTTATCGTCACTTTAAATACGGTTTGAAAAGAGGGCCTTCTACAGAAGGAGTGCCTGAGTCCATGAGGGAAG
AATATCAACAGGAACAGCAGAGTTCTGTGGATGTTGACGATGGTCATTTTGTCAACATAGAGCTAGAGTAA-
-------------------
>A/swine/Indiana/A02214844/2017/1-982
-------------------------ATGAGTCTTCTAACCGAGGTCGAAACGTACGTTCTTTCTATCATACC
GTCAGGCCCCCTCAAAGCCGAGATCGCACAGAGACTGGAAAGTGTCTTTGCAGGAAAGAACACAGATCTTGA
GGCTCTCATGGAATGGCTAAAGACAAGACCAATCTTGTCACCTCTGACTAAGGGAATTTTAGGATTTGTGTT
CACGCTCACCGTGCCCAGTGAGCGAGGACTGCAGCGTAGACGCTTTGTCCAAAATGCCCTAAATGGGAATGG
GGACCCAAACAACATGGATAGAGCAGTTAAACTATACAAGAAGCTCAAAAGAGAAATAACGTTCCATGGGGC
CAAGGAGGTGTCACTAAGCTATTCAACTGGTGCACTTGCCAGTTGCATGGGCCTCATATACAACAGGATGGG
AACAGTGACCACAGAGGCTGCTTTTGGTCTAGTGTGTGCCACCTGTGAACAGATTGCTGATTCACAGCATCG
GTCTCACAGACAAATGGCTACTACCACCAATCCACTAATCAGGCATGAGAACAGAATGGTGCTGGCTAGCAC
TACGGCAAAGGCTATGGAACAGATGGCTGGATCGAGTGAACAGGCAGCGGAGGCCATGGAGGTTGCTAATCA
GACTAGGCAGATGGTACATGCAATGAGAACTATTGGGACTCATCCTAGCTCCAGTACTGGTCTGAAAGATGA
CCTTCTTGAAAATTTACAGGCCTACCAGAAGCGAATGGGAGTGCAGATGCAGCGATTCAAGTGATCATCTCG
CCATTGCAGCAAATATCATTGGGATCTTGCACCTGATATTGTGGATTACTGATCGTCTTTTTTTCAAATGTA
TTTATCGTCGCTTTAAATACGGTTTGAAAAGAGGGCCTTCTACGGAAGGGGTGCCTGAGTCCATGAGGGAAG
AATATCAACAGGAACAGCAGAGTGCTGTGGATGTTGACGATGGTCATTTTGTCAACATAGAGCTAGAGTAA-
-------------------
>A/swine/Iowa/A02214623/2017/1-982
-------------------------ATGAGTCTTCTAACCGAGGTCGAAACGTACGTTCTTTCTATCATACC
GTCAGGCCCCCTCAAAGCCGAGATCGCGCAGAGACTGGAAAGTGTCTTTGCAGGAAAGAATACAGACCTTGA
GGCTCTCATGGAATGGCTAAAGACAAGACCAATCTTGTCACCTTTGACTAAGGGAATTTTAGGATTTGTGTT
CACGCTCACCGTGCCCAGTGAGCGAGGACTGCAGCGTAGACGCTTTGTCCAAAATGCCCTGAATGGGAATGG
GGACCCAAACAACATGGATAGAGCAGTTAAACTATACAAGAAGCTCAAAAGAGAAATAACGTTCCATGGGGC
CAAGGAGGTGTCACTAAGCTATTCAACTGGTGCACTTGCCAGTTGCATGGGCCTCATATACAACAGGATGGG
AACAGTGACCACAGAAGCTGCTTTTGGTCTAGTGTGTGCCACTTGTGAACAGATTGCTGATTCACAGCATCG
GTCTCACAGACAGATGGCTACAACCACCAATCCACTAATCAGGCATGAGAACAGAATGGTGCTGGCTAGCAC
TACGGCAAAGGCTATGGAACAGATGGCTGGATCAAGTGAACAGGCAGCGGAGGCCATGGAGGTTGCCAATCA
GACTAGGCAGATGGTACATGCAATGAGAACTATTGGGACTCATCCTAGTTCTAGTACTGGTCTGAAAGATGA
CCTTCTTGAAAATTTGCAGGCCTATCAGAAACGAATGGGAGTGCAGATGCAGCGGTTCAAGTGATCCTCTCG
CCATTGCAGCAAATATCATTGGGATCTTGCACCTGATATTGTGGATTACTGATCGTCTTTTTTTCAAATGTA
TTTATCGTCGCTTTAAATACGGTTTGAAAAGAGGGCCTTCTACGGAAGGAGTACCTGAGTCCATGAGGGAAG
AATATCAACAGGAACAGCAGAGTGCTGTGGATGTTGACGATGGTCATTTTGTCAACATAGAGCTGGAGTAA-
-------------------
>A/swine/Iowa/A02215201/2017/1-982
-------------------------ATGAGTCTTCTAACCGAGGTCGAAACGTACGTTCTTTCTATCATACC
GTCAGGCCCCCTCAAAGCCGAGATTGCGCAGAGACTGGAAAGTGTCTTCGCAGGAAAGAATACAGACCTTGA
GGCTCTCATGGAATGGCTAAAGACAAGACCAATCTTGTCACCTTTGACTAAAGGAATTTTAGGATTTGTGTT
CACGCTCACCGTGCCCAGTGAGCGAGGACTGCAGCGTAGACGCTTTGTCCAAAATGCCCTGAATGGGAATGG
GGACCCAAACAACATGGATAGAGCAGTTAAACTATACAAGAAGCTCAAAAGAGAAATAACGTTCCATGGGGC
CAAGGAGGTGTCACTAAGCTATTCAACTGGTGCACTTGCCAGTTGCATGGGCCTCATATACAACAGGATGGG
AACAGTGACCACAGAAGCTGCTTTTGGTCTAGTGTGTGCCACTTGTGAACAGATTGCTGATTCACAGCATCG
GTCTCACAGACAGATGGCTACAACCACCAATCCACTAATCAGGCATGAGAACAGAATGGTGCTGGCTAGCAC
TACGGCAAAGGCTATGGAACAGATGGCTGGATCGAGTGAACAGGCAGCGGAGGCCATGGAGGTTGCTAATCA
GACTAGGCAGATGGTACATGCAATGAGAACTATTGGGACTCATCCTAGTTCCAGTACTGGTCTGAAAGATGA
CCTTCTTGAAAATTTGCAGGCCTATCAGAAGCGAATGGGAGTGCAGATGCAGCGGTTCAAGTGATCCTCTCG
CCTTTGCAGCAAATATCATTGGGATCTTGCACCTGATATTGTGGATTACTGATCGTCTTTTTTTCAAATGTA
TTTACCGTCGCTTTAAATACGGTTTGAAAAGAGGGCCTTCTACGGAAGGAGTGCCTGAGTCCATGAGGGAAG
AATATCAACAGGAACAGCAGAGTGCTGTGGATGTTGACGATGGTCATTTTGTCAACATAGAGCTGGAGTAA-
-------------------
>A/swine/Minnesota/A02214846/2017/1-982
-------------------------ATGAGTCTTCTAACCGAGGTCGAAACGTACGTTCTTTCTATCATCCC
ATCAGGCCCCCTCAAAGCCGAGATCGCGCAGAGACTGGAAAGTGTATTTGCAGGAAAGAACACAGATCTTGA
GGCTCTCATGGAATGGCTAAAGACAAGACCAATCTTGTCACCTCTGACTAAGGGAATTTTAGGATTTGTGTT
CACGCTCACCGTGCCCAGTGAGCGAGGACTGCAGCGTAGACGCTTTGTCCAAAATGCCCTAAATGGAAATGG
GGACCCGAACAACATGGATAGAGCAGTTAAACTATACAAGAAGCTCAAAAGAGAAATAACGTTCCATGGGGC
TAAGGAGGTGTCACTAAGCTATTCAACTGGTGCACTTGCCAGTTGCATGGGCCTCATATACAACAGGATGGG
AACAGTGACCACAGAAGCTGCTTTTGGTCTAGTGTGTGCCACCTGTGAACAGATTGCTGATTCACAGCATCG
ATCTCACAGACAAATGGTTGCTACCACCAATCCACTAATCAGGCATGAAAACAGAATGGTGCTGGCTAGCAC
TACTGCAAAGGCTATGGAACAGATGGCTGGATCGAGTGAACAGGCAGCAGAGGCCATGGAGGTTGCTAATCA
GACTAGGCAGATGGTACATGCAATGAGAACTATTGGGACTCATCCTAGCTCCAGTGCTGGTCTGAAGGATGA
CCTTCTTGAAAATTTACAGGCCTACCAGAAGCGAATGGGAGTGCAAATGCAGCGATTCAAGTGATCCTCTCG
TCATTGCAGCAAATATCATTGGGATCTTGCACCTGATATTGTGGATTACTGATCGTCTTTTTTTCAAATGTG
TTTATCGTCGCTTTAAATACGGTTTGAAAAGAGGGCCTCCTACAGAAGGAGTGCCTGAGTCCATGAGGGAAG
AATATCAACAGGAACAGCAGAGTGCTGTGGATGTTGACGATGGTCATTTTGTCAACATAGAGCTAGAGTAA-
-------------------
>A/swine/Indiana/A02214845/2017/1-982
-------------------------ATGAGTCTTCTAACCGAGGTCGAAACGTACGTTCTTTCTATCATCCC
GTCAGGCCCCCTCAAAGCCGAGATCGCGCAGAGACTGGAAAGTGTATTTGCAGGAAAGAACACAGATCTTGA
GGCTCTCATGGAATGGCTAAAGACAAGACCAATCTTGTCACCTCTGACTAAGGGAATTTTAGGATTTGTGTT
CACGCTCACCGTGCCCAGTGAGCGAGGACTGCAGCGTAGACGTTTTGTCCAAAATGCCCTAAATGGGAATGG
GGACCCGAACAACATGGATAGAGCAGTTAAACTATACAAGAAGCTCAAAAGAGAAATAACGTTCCATGGGGC
TAAGGAGGTGTCACTAAGCTATTCAACTGGTGCACTTGCCAGTTGCATGGGCCTCATATACAACAGGATGGG
AACAGTGACCACAGAAGCTGCTTTTGGTCTAGTGTGTGCCACTTGTGAACAGATTGCTGATTCACAGCATCG
ATCTCACAGACAAATGGTTACTACCACCAATCCACTAATCAGGCATGAAAACAGAATGGTGCTGGCTAGCAC
TACTGCAAAGGCTATGGAACAGATGGCTGGATCGAGTGAACAGGCAGCAGAGGCCATGGAGGTTGCTAATCA
GACTAGGCAGATGGTACATGCAATGAGGACTATTGGGACTCATCCTAGCTCCAGTGCTGGTCTGAAGGATGA
CCTTCTTGAAAATTTACAGGCCTACCAGAAGCGAATGGGAGTGCAAATGCAGCGATTCAAGTGATCCTCTCG
TCATTGCAGCAAATATCATTGGGATCCTGCACCTGATATTGTGGATTACTGATCGTCTTTTTTTCAAATGTA
TTTATCGTCGCTTTAAATACGGTTTGAAAAGAGGGCCTCCTACAGAAGGAGTGCCTGAGTCCATGAGGGAAG
AATATCAACAGGAACAGCAGAGTGCTGTAGATGTTGACGATGGTCATTTTGTCAACATAGAGCTAGAGTAA-
-------------------
>A/swine/Illinois/A02215044/2017/1-982
-------------------------ATGAGTCTTCTAACCGAGGTCGAAACGTACGTTCTTTCTATCATCCC
GTCAGGCCCCCTCAAAGCCGAGATCGCGCAGAGACTGGAAAGTGTATTTGCAGGAAAGAACACAGACCTTGA
GGCTCTCATGGAATGGTTAAAGACAAGACCAATCTTGTCACCTCTGACTAAGGGAATTTTAGGATTTGTGTT
CACGCTCACCGTGCCCAGTGAGCGAGGACTGCAGCGTAGACGCTTTGTCCAAAATGCCCTAAATGGGAATGG
GGACCCGAACAACATGGATAGAGCAGTTAAACTATACAAGAAGCTCAAAAGAGAAATAACGTTCCATGGGGC
TAAGGAGGTGTCACTGAGCTATTCAACTGGTGCACTTGCCAGTTGCATGGGCCTCATATACAACAGGATGGG
AACAGTGACCACAGAAGCTGCTTTTGGTCTAGTGTGTGCCACTTGTGAGCAGATTGCTGATTCACAGCATCG
ATCTCACAGACAAATGGCTACTACCACCAATCCACTAATCAGGCATGAAAATAGAATGGTGCTGGCTAGCAC
TACTGCAAAGGCTATGGAACAGATGGCTGGATCGAGTGAACAGGCAGCAGAGGCCATGGAGGTTGCTAATCA
GACTAGGCAGATGGTACATGCAATGAGAACTATTGGGACTCATCCTAGCTCCAGTGCTGGTCTGAAGGATGA
CCTTCTTGAAAATTTACAGGCCTACCAGAAGCGAATGGGAGTGCAAATGCAGCGATTCAAGTGATCCTCTCG
TCATTGCAGCAAATATCATTGGGATCTTGCACCTGATATTGTGGATTACTGATCGTCTTTTTTTCAAATGTA
TTTATCGTCGCTTTAAATACGGTTTGAAAAGAGGGCCTTCTACAGAAGGAGTGCCTGAGTCCATGAGGGAAG
AATATCAACAGGAACAGCAGAGTGCTGTGGATGTTGACGATGGTCATTTTGTCAACATAGAGCTAGAGTAA-
-------------------
>A/swine/North_Carolina/A02214775/2017/1-982
-------------------------ATGAGTCTTCTAACCGAGGTCGAAACGTACGTTCTTTCTATCATACC
GTCAGGCCCCCTCAAAGCCGAGATCGCGCAGAGACTGGAAAGTGTCTTTGCAGGAAAGAATACAGATCTTGA
AGCTCTCATGGAATGGCTAAAGACAAGACCAATCTTGTCACCTCTGACTAAGGGAATTTTAGGATTTGTATT
CACGCTCACCGTGCCCAGTGAGCGAGGACTGCAGCGTAGACGCTTTGTCCAAAATGCCCTGAATGGGAATGG
GGACCCAAACAACATGGATAGAGCAGTTAAATTATACAAGAAGCTCAAAAGAGAAATAACATTCCATGGGGC
CAAGGAGGTGTCACTAAGCTATTCAACTGGTGCACTTGCCAGTTGCATGGGCCTCATATACAACAGGATGGG
AACAGTGACCACAGAAGCTGCTTTTGGTCTAGTGTGTGCCACTTGTGAACAGATTGCTGATTCACAGCATCG
GTCTCACAGACAGATGGCTACAACCACCAATCCACTAATCAGGCATGAGAACAGAATGGTGCTGGCTAGCAC
TACGGCAAAGGCTATGGAACAGATGGCTGGATCGAGTGAGCAGGCAGCAGAGGCCATGGAGGTTGCTAATCA
GACTAGGCAGATGGTACATGCAATGAGAACTATTGGGACTCATCCTAGTTCCAGTACTGGTCTGAAAGATGA
CCTTCTTGAAAATTTGCAGGCCTACCAGAAGCGAATGGGAGTGCAGATGCAGCGATTCAAGTGATCCTCTCG
CCATTGCAGCAAATATCATTGGGATCTTGCACCTGATATTGTGGATTGCTGATCGTCTTTTTTTCAAATGTA
TTTATCGTCGCTTTAAATACGGTTTGAAAAGAGGGCCTTCAACGGAAGGAGTGCCTGAGTCCATGAGGGAAG
AATACCAACAGGAACAGCAGAGTGCTGTGGATGTTGACGATGGTCATTTTGTCAACATAGAGCTAGAGTAA-
-------------------
>A/swine/North_Carolina/A02214821/2017/1-982
-------------------------ATGAGTCTTCTAACCGAGGTCGAAACGTACGTTTTGTCTATCATTCC
GTCAGGCCCCCTCAAAGCCGAGATCGCGCAGAGAATGGAAAGTGTCTTTGCAGGAAAGAACACAGATCTTGA
GGCTCTCATGGAATGGCTAAAGACAAGACCAATCTTGTCACCTCTGACTAAGGGAATTTTAGGATTTGTGTT
CACGCTCACCGTGCCCAGTGAGCGAGGACTGCAGCGTAGACGCTTTGTCCAAAATGCCCTGAATGGAAATGG
GGACCCAAACAACATGGATAGAGCAGTTAAACTATACAAGAAGCTCAAAAGAGAAATAACGTTCCATGGGGC
AAAGGAGGTGTCACTTAGCTATTCAACTGGTGCACTTGCCAGTTGCATGGGCCTCATATACAACAGGATGGG
AACAGTGACCACAGAAGCTGCTTTTGGTCTAGTGTGTGCCACTTGTGAACAGATTGCTGATTCACAGCATCG
GTCTCACAGACAGATGGTTACTACCACCAATCCACTAATCAGGCATGAGAACAGAATGGTGCTGGCTAGCAC
TACAGCAAAGGCCATGGAACAGATGGCTGGATCGAGTGAACAGGCAGCGGAGGCCATGGAGGTTGCTAATCA
GACTAGGCAGATGGTACATGCAATGAGAACTATTGGGACTCATCCTAGCTCCAGTACTGGTCTGAAAGATGA
CCTTCTTGAAAATTTGCAGGCCTACCAGAAGCGAATGGGAGTGCAGATGCAGCGATTCAAGTGATCCTCTCG
CCATTGCAGCCAATATCATTGGGATCTTGCACCTGATATTGTGGATTACTGATCGTCTTTTTTTCAAATGCA
TTTATCGTCGCTTTAAATACGGTTTGAAAAGAGGGCCTTCTACGGAAGGAGTGCCTGAGTCCATGAGGGAAG
AATATCAACAGGAACAGCAGAGTGCTGTGGATGTTGACGATGGTCATTTTGTCAACATAGAGCTAGAGTAA-
-------------------
>A/swine/Illinois/A02214842/2017/1-982
-------------------------ATGAGTCTTCTAACAGAGGTCGAAACGTACGTTCTCTCTATCATACC
GTCAGGCCCCCTCAAAGCCGAGATCGCGCAGAGACTGGAGAGTGTCTTTGCAGGAAAGAACACAGATCTTGA
GGCTCTCATGGAATGGCTAAAGACAAGACCAATCTTGTCACCTCTGACTAAGGGAATTTTAGGATTTGTGTT
CACGCTCACCGTGCCCAGTGAGCGAGGACTGCAGCGTAGACGCTTTGTCCAAAATGCCCTGAATGGGAATGG
GGACCCAAACAACATGGATAGAGCAGTTAAACTATACAAGAAGCTCAAAAGAGAAATAACGTTCCATGGGGC
CAAAGAGGTGTCACTAAGCTATTCAACTGGTGCACTTGCCAGTTGCATGGGCCTCATATACAACAGGATGGG
AACAGTGACCACAGAAGCTGCTTTTGGTCTAGTGTGTGCCACTTGTGAACAGATTGCTGATTCACAGCATCG
GTCTCACAGACAGATGGCTACTACGACCAATCCACTAATCAGGCATGAGAACAGAATGGTGCTGGCTAGCAC
TACGGCAAAGGCTATGGAACAGATGGCTGGATCGAGTGAACAGGCAGCGGAGGCCATGGAGGTTGCTAATCA
GACTAGGCAGATGGTACATGCAATGAGAACTATTGGGACTCATCCTAGCTCCAGTACTGGTCTGAAAGATGA
CCTTCTCGAAAATTTGCAGGCCTACCAGAAGCGAATGGGAGTGCAGATGCAGCGATTCAAGTGACCCTCTCG
CCATTGCAGCAAACATCATTGGGATCTTGCACCTGATATTGTGGATTACTGATCGTCTTTTTTTCAAATGTA
TTTATCGTCGCTTTAAATACGGTTTGAAAAGAGGGCCTTCAACGGAAGGAGTGCCTGAGTCCATGAGGGAAG
AATATCAACAGGAGCGGCAGAGTGCTGTGGATGTTGACGATGGTCATTTTGTCAACATAGAGCTAGAGTAA-
-------------------
>A/swine/Ohio/A02214848/2017/1-982
-------------------------ATGAGTCTTCTAACAGAGGTCGAAACGTACGTTCTTTCTATCATCCC
GTCAGGCCCCCTCAAAGCCGAGATCGCGCAGAGACTGGAAAGTGTATTTGCAGGAAAGAACACAGATCTTGA
GGCTCTCATGGAATGGCTAAAGACAAGACCAATCTTGTCACCTCTGACTAAGGGAATTTTAGGATTTGTGTT
CACGCTCACCGTGCCCAGTGAGCGAGGACTGCAGCGTAGACGCTTTGTCCAAAATGCCCTAAATGGGAACGG
GGACCCGAACAACATGGATAGAGCAGTTAAACTATACAAGAAGCTCAAAAGAGAAATAACGTTCCATGGGGC
TAAGGAGGTGTCACTAAGCTATTCAACTGGTGCACTTGCCAGTTGCATGGGCCTCATATACAACAGGATGGG
AACAGTGACCACAGAAGCTGCTTTTGGTCTAGTGTGTGCCACTTGTGAACAGATTGCTGATTCACAGCATCG
ATCTCACAGACAAATGGTTACTACCACCAATCCACTAATCAGGCATGAAAACAGAATGGTGCTGGCTAGCAC
TACTGCAAAGGCTATGGAACAGATGGCTGGATCGAGTGAACAGGCAGCAGAGGCCATGGAGGTTGCTAATCA
GACTAGGCAGATGGTACATGCAATGAGGACTATTGGGACTCATCCTAGCTCCAGTGCTGGTCTGAAGGATGA
CCTTCTTGAAAATTTACAGGCCTACCAGAAGCGAATGGGAGTGCAAATGCAGCGATTCAAGTGATCCTCTCG
TCATTGCAGCAAATATCATTGGGATCTTGCACCTGATATTGTGGATTACTGATCGTCTTTTTTTCAAATGTA
TTTATCGTCGCTTTAAATACGGTTTGAAAAGAGGGCCTCCTACAGAAGGAGTGCCTGGGTCCATGAGGGAAG
AATATCAACAGGAACAGCAGAGTGCTGTAGATGTTGACGATGGTCATTTTGTCAACATAGAGCTAGAGTAA-
-------------------
>A/swine/Illinois/0TM102/2017/1-1003
-----------GTAGATGTTTAAAGATGAGTCTTCTGACCGAGGTCGAAACGTACGTTCTTTCTATCATCCC
GTCAGGCCCCCTCAAAGCCGAGATCGCACAGAGACTGGAAAGTGTCTTTGCAGGAAAGAACACAGATCTTGA
GGCCCTCATGGAATGGCTAAAGACAAGACCAATCTTGTCACCTCTGACTAAGGGGATTTTAGGATTTGTGTT
CACGCTCACCGTGCCCAGTGAGCGAGGACTGCAGCGTAGACGCTTTGTCCAAAATGCCCTAAATGGAAATGG
GGACCCGAACAACATGGATAGAGCAGTTAAGCTATACAAGAAGCTCAAAAGAGAAATAACATTCCATGGGGC
CAAGGAGGTGTCACTAAGCTATTCAACTGGTGCACTTGCCAGTTGCATGGGCCTCATATACAACAGGATGGG
AACAGTAACCACAGAAGCTGCTTTTGGTCTAGTGTGTGCCACTTGTGAACAGATTGCTGATTCACAGCATCG
GTCTCACAGACAAATGGCTACTACCACCAATCCACTGATCAGGCATGAAAACAGGATGGTGCTGGCTAGCAC
TACGGCAAAGGCTATGGAACAGATGGCTGGATCGAGTGAGCAGGCAGCAGAGGCCATGGAGGTTGCTAATAA
GACTAGGCAGATGGTACATGCAATGAGAACTATTGGGACTCATCCTAGCTCCAGTGCTGGTCTGAAAGATGA
TCTTCTTGAAAATTTGCAGGCCTACCAGAAGCGAATGGGAGTGCAAATGCAGCGATTCAAATGATCCTCTCG
TCATTGCAGCAAATATCATTGGGATCTTGCACCTGATATTGTGGATTTCTGATCGTCTTTTTTTCAAATGTG
TTTATCGTCACTTTAAATACGGTTTGAAAAGAGGGCCTTCTACAGAAGGAGTGCCTGAGTCCATGAGGGAAG
AATATCAACAGGAACAGCAGAGTTCTGTGGATGTTGACGATGGTCATTTTGTCAACATAGAGCTAGAGTAAA
AAACTA-------------
>A/swine/Ohio/A01354316/2017/1-982
-------------------------ATGAGTCTTCTAACCGAGGTCGAAACGTACGTTCTTTCTATCATACC
GTCAGGCCCCCTCAAAGCCGAGATCGCGCAGAGACTGGAAAGTGTCTTTGCAGGAAAAAACACAGATCTTGA
AGCTCTCATGGAATGGCTAAAGACAAGACCAATCTTGTCACCTCTGACTAAGGGAATTTTAGGATTTGTGTT
CACGCTCACCGTGCCCAGTGAGCGAGGACTGCAGCGTAGACGCTTTGTCCAAAATGCCCTGAATGGGAATGG
GGACCCAAACAACATGGATAGAGCAGTTAAACTATACAAGAAGCTCAAAAGAGAAATAACATTCCATGGGGC
CAAGGAGGTGTCACTAAGCTATTCAACTGGTGCACTTGCCAGTTGCATGGGCCTCATATACAACAGGATGGG
AACAGTGACCACAGAAGCTGCTTTTGGTCTAGTGTGTGCCACTTGTGAACAGATTGCTGATTCACAGCATCG
GTCTCACAGACAAATGGCTACAACCACCAATCCACTAATCAGGCATGAAAACAGAATGGTGCTGGCTAGCAC
TACGGCAAAGGCTATGGAACAGATGGCTGGATCGAGTGAACAGGCAGTGGAGGCCATGGAGGTTGCTAATCA
GACTAGGCAGATGGTACATGCAATGAGAACTATTGGGACTCATCCTAGCTCCAGTACTGGTCTGAAAGATGA
CCTTCTTGAAAATTTGCAGGCCTACCAGAAGCGAATGGGAGTGCAGATGCAGCGATTCAAATGATCCTCTCG
CCATTGCAGCAAATATCATTGGGATCTTGCACCTGATATTGTGGATTGCTGATCGTCTTTTTTTCAAATGTA
TTTATCGTCGCTTTAAATACGGTTTGAAAAGAGGGCCTTCAACGGAAGGAGTGCCTGAGTCCATGAGGGAAG
AATACCAACAGGAACAGCAGAGTGCTGTGGATGTTGACGATGGTCATTTTGTCAACATAGAGCTAGAGTAA-
-------------------
>A/swine/Iowa/A02215197/2017/1-982
-------------------------ATGAGTCTTCTAACCGAGGTCGAAACGTACGTTCTTTCTATCATCCC
GTCAGGCCCCCTCAAAGCCGAGATCGCGCAGAGACTGGAAAGTGTATTTGCAGGAAAGAACACAGATCTTGA
GGCTCTCATGGAATGGCTAAAGACAAGACCAATCTTGTCACCTCTGACTAAGGGAATTTTAGGATTTGTGTT
CACGCTCACCGTGCCCAGTGAGCGAGGACTGCAGCGTAGACGCTTTGTCCAAAATGCCCTAAATGGGAATGG
GGACCCGAACAACATGGATAGAGCAGTTAAACTATACAAGAAGCTCAAAAGAGAAATAACGTTCCATGGGGC
TAAGGAGGTGTCACTAAGCTATTCAACTGGTGCACTTGCCAGTTGCATGGGCCTCATATACAACAGGATGGG
AACAGTGACCACAGAAGCTGCTTTTGGTCTAGTGTGCGCCACTTGTGAACAGATTGCTGATTCACAGCATCG
ATCTCACAGACAAATGGCTACTACCACCAATCCACTAATCAGGCATGAAAACAGAATGGTGCTGGCTAGCAC
TACTGCAAAGGCTATGGAACAGATGGCTGGGTCGAGTGAACAGGCAGCAGAGGCCATGGAGGTTGCTAATCA
GACTAGGCAGATGGTACATGCAATGAGGACTATTGGGACTCATCCTAGCTCCAGTGCTGGTCTGAAGGATGA
CCTTCTTGAAAATTTACAGGCCTACCAGAAGCGAATGGGAGTGCAAATGCAGCGATTCAAGTGATCCTCTCG
TCATTGCAGCAAATATCATTGGGATCTTGCACCTGATATTGTGGATTACTGATCGTCTTTTTTTCAAATGTA
TCTATCGTCGCTTTAAATACGGTTTGAAAAGAGGGCCTTCTACAGAAGGAGTGCCTGAGTCCATGAGGGAAG
AATATCAACAGGAACAGCAGAGTGCTGTGGATGTTGACGATGGTCATTTTGTCAACATAGAGCTAGAGTAA-
-------------------
>A/swine/Iowa/A02215202/2017/1-982
-------------------------ATGAGTCTTCTAACCGAGGTCGAAACGTACGTTCTTTCTATCATCCC
GTCAGGCCCCCTCAAAGCCGAGATCGCGCAGAGACTGGAGAGTGTCTTTGCAGGAAAAAACACAGATCTTGA
AGCTCTCATGGAATGGCTAAAGACAAGACCAATCTTGTCACCTTTGACTAAGGGAATTTTAGGATTTGTGTT
CACGCTCACCGTGCCCAGTGAGCGAGGACTGCAGCGTAGACGCTTTGTCCAAAATGCCCTAAATGGGAATGG
GGACCCAAACAACATGGATAGAGCAGTCAAACTATACAAGAAGCTCAAAAGAGAAATAACGTTCCATGGGGC
CAAGGAGGTGTCACTAAGCTATTCAACTGGTGCACTTGCCAGTTGCATGGGCCTCATATATAACAGGATGGG
GACAGTAACCACAGAAGCTGCTTTTGGTCTAGTATGTGCCACCTGTGAACAGATTGCTGATTCACAGCATCG
GTCTCACAGACAAATGGCTACCACCACCAATCCACTAATCAGGCATGAAAACAGAATGGTGCTGGCTAGCAC
TACGGCAAAGGCTATGGAACAGATGGCTGGATCGAGTGAACAGGCAGCAGAGGCCATGGAGGTTGCTAATCA
GACTAGGCAGATGGTACATGCAATGAGGACTATTGGGACTCATCCTAGCTCCAGTGCTGGTCTGAAAGATGA
CCTTCTTGAAAACTTGCAGGCCTACCAGAAACGAATGGGAGTGCAGATGCAGCGATTCAAGTGATCCTCTCG
TCATTGCAGCAAATATCATTGGGATCTTGCACCTGATATTGTGGATTACAGATCGTCTTTTTTTCAAATGCA
TTTATCGTCGCTTTAAATACGGGTTGAAAAGAGGGCCTTCTACGGAAGGAGTGCCTGAGTCCATGAGGGAAG
AATATCAACAGGAACAGCAGAGTGCGGTGGATGTTGACGATGGTCATTTTGTCAACATAGAGCTAGAGTAA-
-------------------
>A/swine/Nebraska/A01785261/2017/1-982
-------------------------ATGAGTCTTCTAACCGAGGTCGAAACGTACGTTCTTTCTATCGTCCC
GTCAGGCCCCCTCAAAGCCGAGATCGCGCAGAGACTGGAAAGTGTCTTTGCAGGAAAGAACACAGATCTTGA
GGCTCTAATGGAATGGCTAAAGACAAGACCAATCTTGTCACCTCTGACTAAGGGAATTTTAGGGTTTGTGTT
CACGCTCACCGTGCCCAGTGAGCGAGGACTGCAGCGTAGACGCTTTGTCCAAAATGCCCTAAATGGGAATGG
GGACCCGAACAACATGGATAGAGCAGTTAAACTATACAAGAAGCTCAAAAGAGAAATAACGTTCCATGGGGC
CAAGGAGGTGTCGCTAAGCTATTCAACTGGTGCACTTGCCAGTTGCATGGGCCTCATATACAACAGGATGGG
AACAGTGACCACAGAAGCTGCTTTTGGCCTAGTGTGTGCCACTTGTGAACAGATTGCTGATTCACAGCATCG
GTCCCACAGACAAATGGTTACTACTACCAATCCATTAATCAGGCATGAAAACAGAATGGTCCTGGCTAGCAC
TACGGCAAAGGCTATGGAACAGATGGCTGGATCGAGTGAACAGGCAGCAGAGGCCATGGAGGTTGCTAATCA
GACTAGGCAGATGGTACATGCAATGAGAACTATTGGTACTCATCCTAGCTCCAGTGCTGGTCTGAAAGATGA
CCTCCTTGAAAATTTGCAGGCCTACCAGAAGCGAATGGGAGTGCAGATGCAGCGATTCAAGTGATACTCTCG
CCATTGCAGCAAATATCATTGGGATCTTGCACCTGATATTGTGGATTACTGATCGTCTTTTTTTCAAATGCA
TTTATCGTCGATTTAAATACGGTTTGAAAAGAGGGCCTTCTACGGAAGGAGTGCCTGAGTCCATGAGGGAAG
AATATCAACAGGAACAGCAGAGTGCTGTGGATGTTGACGATGGTCATTTTGTCAACATAGAGCTAGAGTAA-
-------------------
>A/swine/Missouri/A02216048/2017/1-982
-------------------------ATGAGTCTTCTAACCGAGGTCGAAACGTACGTCCTTTCTATCATACC
GTCAGGCCCCCTCAAAGCCGAGATCGCGCAGAGACTGGAAAGTGTCTTTGCAGGAAAGAACACAGATCTTGA
GGCTCTCATGGAATGGCTAAAGACAAGACCAATCTTGTCACCTCTGACTAAAGGAATTTTAGGATTTGTGTT
CACGCTCACCGTGCCCAGTGAGCGAGGACTGCAGCGTAGACGCTTTGTCCAAAATGCCCTAAATGGGAATGG
GGACCCAAACAACATGGATAGAGCAGTCAAACTATACAAGAAGCTCAAAAGAGAAATAACGTTCCATGGGGC
CAAGGAGGTGTCACTAAGCTATTCAACTGGTGCACTTGCCAGTTGCATGGGCCTCATATACAACAGGATGGG
AACAGTGACCACTGAAGCTGCATTTGGTCTAGTGTGTGCCACTTGTGAACAGATTGCTGATTCTCAGCATCG
ATCTCACAGACAGATGGCTACTACCACCAATCCACTAATCAGGCATGAGAACAGAATGGTGCTAGCTAGCAC
TACGGCAAAGGCTATGGAACAGATGGCTGGATCGAGTGAACAGGCAGCGGAGGCCATGGAGGTTGCTAATCA
GACTAGGCAGATGGTACATGCAATGAGAACTATTGGGACTCATCCTAGTTCTAGTACTGGTCTGAAAGATGA
CCTTCTTGAAAATTTGCAGGCCTACCAGAAGCGAATGGGAGTGCAGATGCAGCGGTTCAAGTGATCCTCTCG
CCATTGCAGCAAATATCATTGGGATCTTGCACCTGATATTGTGGATTACTGATCGTCTTTTTTTCAAATGTA
TTTATCGTCGCTTTAAATACGGTTTGAAAAGAGGGCCTTCTACGGAAGGAGTGCCTGAGTCAATGAGGGAAG
AATATCAACAGGAACAGCAGAATGCTGTGGATGTTGACGATGGTCATTTTGTCAACATAGAGCTAGAGTAA-
-------------------
>A/swine/Iowa/A02216046/2017/1-982
-------------------------ATGAGTCTTCTAACCGAGGTCGAAACGTACGTTCTTTCTATCATCCC
GTCAGGCCCCCTCAAAGCCGAGATCGCGCAGAGACTGGAAAGTGTATTTGCAGGAAAGAACACAGATCTTGA
GGCTCTCATGGAATGGCTAAAGACAAGACCAATCTTGTCACCTCTGACTAAGGGAATTTTAGGATTTGTGTT
CACGCTCACCGTGCCCAGTGAGCGAGGACTGCAGCGTAGACGCTTTGTCCAAAATGCCCTAAATGGGAATGG
GGACCCGAACAACATGGATAGAGCAGTTAAACTATACAAGAAGCTCAAAAGAGAAATAACGTTCCATGGGGC
TAAGGAGGTGTCACTAAGCTATTCAACTGGTGCACTTGCCAGTTGCATGGGCCTCATATACAACAGGATGGG
AACAGTGACCACAGAAGCTGCTTTTGGTCTGGTGTGTGCCACCTGTGAACAGATTGCTGATTCACAGCATCG
ATCTCACAGACAAATGGTTACTACCACCAATCCACTAATCAGGCATGAAAACAGAATGGTGCTGGCTAGCAC
TACTGCAAAGGCTATGGAACAGATGGCTGGATCGAGTGAACAGGCAGCAGAGGCCATGGAGGTTGCTAATCA
GACTAGGCAGATGGTACATGCAATGAGAACTATTGGGACTCATCCTAGCTCCAGTGCTGGTCTGAAGGATGA
CCTTCTTGAAAATTTACAGGCCTACCAGAAGCGAATGGGAGTGCAAATGCAGCGATTCAAGTGATCCTCTCG
TCATTGCAGCAAATATCATTGGGATCTTGCACCTGATATTGTGGATTACTGATCGTCTTTTTTTCAAATGTA
TTTATCGTCGCTTTAAATACGGTTTGAAAAGAGGGCCTCCTACAGAAGGAGTGCCTGAGTCCATGAGGGAAG
AATATCAACAGGAACAGCAGAGTGCTGTGGATGTTGACGATGGTCATTTTGTCAACATAGAGCTAGAGTAA-
-------------------
>A/swine/Iowa/A02215038/2017/1-982
-------------------------ATGAGTCTTCTAACCGAGGTCGAAACGTACGTTCTTTCTATCATCCC
GTCAGGCCCCCTCAAAGCCGAGATCGCGCAGAGACTGGAAAGTGTCTTTGCAGGAAAGAACACAGATCTTGA
GGCTCTCATGGAATGGCTAAAGACAAGACCAATCTTGTCACCTTTGACTAAGGGTATTTTAGGATTTGTGTT
CACGCTCACCGTGCCCAGTGAGCGAGGACTGCAGCGTAGACGCTTTGTCCAAAATGCCCTAAATGGGAATGG
GGACCCAAACAACATGGATAGAGCAGTTAAACTATACAAGAAGCTCAAAAGAGAAATAACGTTCCATGGGGC
CAAGGAGGTGTCACTAAGCTATTCAACTGGCGCACTTGCCAGTTGCATGGGCCTTATATACAACAGGATGGG
AACAGTAACCACAGAAGCTGCTTTTGGTCTAGTATGTGCCACTTGTGAACAGATCGCTGATTCACAGCATCG
GTCTCACAGACAAATGGCTACTACCACCAATCCACTAATCAGGCATGAAAACAGAATGGTGCTGGCTAGCAC
TACGGCAAAGGCTATGGAACAGATGGCTGGATCGAGTGAACAGGCAGCAGAGGCCATGGAGGTTGCTAACCA
GACTAGGCAAATGGTACATGCAATGAGAACTATTGGTACTCATCCTAGCTCCAGTGCTGGTCTGAAAGATGA
CCTTCTTGAAAATTTGCAGGCCTACCAGAAACGAATGGGAGTGCAGATGCAGCGATTCAAGTGATCCTCTCG
TCATTGCAGCAAATATCATTGGGATCTTGCACCTGATATTGTGGATTACAGATCGTCTTTTTTTCAAATGCA
TTTATCGTCGCTTTAAATACGGGTTGAAAAGAGGGCCCTCTACGGAAGGAGTGCCTGAGTCCATGAGGGAAG
AATATCAACAGGAACAGCAGAGTGCTGTGGATGTTGACGATGGTCATTTTGTCAACATAGAGCTAGAGTAA-
-------------------
>A/swine/Indiana/A02216464/2017/1-982
-------------------------ATGAGTCTTCTAACCGAGGTCGAAACGTACGTTCTTTCTATCATACC
GTCAGGCCCCCTCAAAGCCGAGATTGCGCAGAGACTGGAAAGTGTCTTTGCAGGAAAGAATACAGACCTTGA
GGCTCTCATGGAATGGCTAAAGACAAGACCAATCTTGTCACCTTTGACTAAGGGAATTTTAGGATTTGTGTT
CACGCTCACCGTGCCCAGTGAGCGAGGACTGCAGCGTAGACGCTTCGTCCAAAATGCCCTGAATGGGAATGG
GGACCCAAACAACATGGATAGAGCAGTTAAACTATACAAGAAGCTCAAAAGAGAAATAACGTTCCATGGGGC
CAAGGAGGTGTCACTAAGCTATTCAACTGGTGCACTTGCCAGTTGCATGGGCCTCATATACAACAGGATGGG
AACAGTGACCACAGAAGCTGCTTTTGGTCTAGTGTGTGCCACTTGTGAACAGATTGCTGATTCACAGCATCG
GTCTCACAGACAGATGGCTACAACCACCAATCCACTAATCAGGCATGAGAACAGAATGGTGCTGGCTAGCAC
TACGGCAAAGGCTATGGAACAGATGGCTGGATCGAGTGAACAGGCAGCGGAGGCCATGGAGGTTGCTAATCA
GACTAGGCAGATGGTACATGCAATGAGAACTATTGGGACTCATCCTAGTTCCAGTACTGGTCTGAAAGATGA
CCTTCTTGAAAATTTGCAGGCCTATCAGAAGCGAATGGGAGTGCAGATGCAGCGGTTTAAGTGATCCTCTCG
CCATTGCAGCAAATATCATTGGGATCTTGCACCTGATATTGTGGATTACTGATCGTCTTTTTTTCAAATGTA
TTTATCGTCGCTTTAAATACGGTTTGAAAAGAGGGCCTTCTACGGAAGGAGTGCCTGAGTCCATGAGGGAAG
AATATCAACAGGAACAGCAGAGTGCTGTGGATGTTGACGATGGTCATTTTGTCAACATAGAGCTGGAGTAA-
-------------------
>A/swine/Iowa/A02215363/2017/1-982
-------------------------ATGAGTCTTCTAACCGAGGTCGAAACGTACGTTCTTTCTATCATACC
GTCAGGCCCCCTCAAAGCCGAGATCGCGCAGAGACTGGAAAGTGTCTTTGCAGGAAAGAATACAGACCTTGA
GGCTCTCATGGAATGGCTAAAGACAAGACCAATCTTGTCACCTTTGACTAAGGGAATTTTGGGATTTGTGTT
CACGCTCACCGTGCCCAGTGAGCGAGGACTGCAGCGTAGACGCTTTGTCCAAAATGCCCTGAATGGGAATGG
GGACCCAAACAACATGGATAGAGCAGTCAAACTATACAAGAAGCTCAAAAGAGAAATAACATTTCATGGGGC
CAAGGAGGTGTCACTAAGCTATTCAACTGGTGCACTTGCCAGTTGCATGGGCCTCATATACAACAGGATGGG
AACAGTGACCACAGAAGCTGCTTTTGGTCTAGTGTGTGCCACTTGTGAACAGATTGCTGATTCACAGCATCG
GTCTCACAGACAGATGGCTACAACCACCAATCCACTAATCAGGCATGAGAACAGAATGGTGCTGGCTAGCAC
TACGGCAAAGGCTATGGAACAGATGGCTGGATCGAGTGAACAGGCAGCGGAGGCCATGGAGGTTGCTAATCA
GACTAGGCAGATGGTACATGCAATGAGAACTATTGGGACTCATCCTAGTTCCAGTACTGGTCTGAAAGATGA
CCTTCTTGAAAATTTGCAGGCCTATCAGAAGCGAATGGGAGTGCAGATGCAGCGGTTTAAGTGACCCTCTCG
CCATTGCAGCAAATATCATTGGGATCTTGCACCTGATATTGTGGATTACTGATCGTCTTTTTTTCAAATGTA
TTTATCGTCGCTTTAAATACGGTTTGAAAAGAGGGCCTTCTACGGAAGGAGTGCCTGAGTCCATGAGGGAAG
AATATCAACAGGAACAGCAGAGTGCTGTGGATGTTGACGATGGTCATTTTGTCAACATAGAGCTGGAGTAA-
-------------------
>A/swine/Minnesota/A02216466/2017/1-982
-------------------------ATGAGTCTTCTAACCGAGGTCGAAACGTACGTTCTTTCTGTCATACC
GTCAGGCCCCCTCAAAGCCGAGATTGCGCAGAGACTGGAAAGTGTCTTTGCAGGAAAGAACACAGACCTTGA
GGCTCTCATGGAATGGCTAAAGACAAGACCAATCTTGTCACCTTTGACTAAGGGAATTTTAGGATTTGTATT
CACGCTCACCGTGCCCAGTGAGCGAGGACTGCAGCGTAGACGCTTTGTCCAAAATGCCCTGAATGGGAATGG
GGACCCAAACAATATGGATAGAGCAGTCAAACTATACAAGAAGCTCAAAAGAGAAATAACGTTCCATGGGGC
CAAGGAGGTGTCACTAAGCTATTCAACTGGTGCACTTGCCAGTTGCATGGGCCTCATATACAACAGGATGGG
AACAGTGACCACAGAAGCTGCTTTTGGTCTAGTATGTGCCACTTGTGAACAGATTGCTGATTCACAGCATCG
GTCTCACAGACAGATGGCTACAACCACCAATCCACTAATCAGGCATGAGAACAGAATGGTGCTGGCTAGCAC
TACGGCAAAAGCTATGGAACAGATGGCTGGATCGAGTGAACAGGCAGCGGAGGCCATGGAGGTTGCTAATCA
GACTAGGCAGATGGTACATGCAATGAGAACTATTGGGACTCATCCTAGTTCCAGTACTGGTCTGAAAGATGA
CCTTCTTGAAAATTTGCAGGCCTACCAGAAGCGAATGGGAGTGCAGATGCAGCGATTCAAGTGATCCTCTCG
CCATTGCAGCAAATATCATTGGGATCTTGCACCTGATATTGTGGATTACTGATCGTCTTTTTTTCAAATGTA
TTTATCGTCGCTTTAAATACGGTTTGAAAAGAGGGCCTTCTACGGAAGGTGTGCCTGAGTCCATGAGGGAAG
AATATCAACAGGAACAGCAGAGTGCTGTGGATGTTGACGATGGTCATTTTGTCAACATAGAGCTAGAGTAA-
-------------------
>A/swine/Illinois/A02216460/2017/1-982
-------------------------ATGAGTCTTCTAACCGAGGTCGAAACGTACGTTCTTTCTATCATCCC
GTCAGGCCCCCTCAAAGCCGAGATCGCGCAGAGACTGGAAAGTGTCTTTGCAGGAAAGAACACAGATCTTGA
GGCTCTCATGGAATGGCTAAAGACAAGACCGATCTTGTCACCTTTGACTAAGGGAATTTTAGGATTTGTGTT
CACGCTCACCGTGCCCAGTGAGCGAGGACTGCAGCGTAGACGCTTTGTCCAAAATGCCCTAAATGGGAATGG
GGACCCAAACAACATGGATAGAGCAGTTAAACTATACAAGAAGCTCAAAAGAGAAATAACGTTCCATGGGGC
CAAGGAGGTGGCACTAAGCTATTCAACTGGTGCACTTGCCAGTTGCATGGGCCTCATATACAACAGGATGGG
AACAGTAACCACAGAAGCTGCTTTTGGTCTAGTATGTGCCACTTGTGAACAGATTGCTGATTCACAGCATCG
GTCTCACAGACAAATGGCTACTACCACCAATCCACTAATCAGGCATGAAAACAGAATGGTGCTGGCTAGCAC
TACGGCAAAGGCTATGGAACAGATGGCTGGATCGAGTGAACAGGCAGCAGAGGCCATGGAGGTTGCTAATCA
GACTAGGCAGATGGTACATGCAATGAGAACTATTGGGACTCATCCTAGCTCCAGTGCTGGTCTGAAAGATGA
CCTTCTTGAAAATTTGCAGGCCTACCAGAAACGAATGGGAGTGCAGATGCAGCGATTCAAGTGATCCTCTCG
TCATTGCAGCTAATATCATTGGGATCTTGCACTTGATATTGTGGATTACAGATCGTCTTTTCTTCAAATGCA
TTTATCGTCGCTTTAAATACGGGCTGAAAAGAGGGCCTTCTACGGAAGGAGTGCCTGAGTCCATGAGGGAAG
AATATCAACAGGAACAGCAGAGTGTGGTGGATGTTGACAATGGTCATTTTGTCAACATAGAGCTAGAGTAA-
-------------------
>A/swine/Iowa/A02216044/2017/1-982
-------------------------ATGAGTCTTCTAACCGAGGTCGAAACGTACGTTCTTTCTATCATCCC
GTCAGGCTCCCTCAAAGCCGAGATCGCGCAGAGACTGGAAAGTGTTTTTTCAGGAAAGAACACAGATCTTGA
GGCTCTCATGGAATGGCTAAAGACAAGACCAATCTTGTCACCTCTGACCAAGGGGATTTTAGGATTTGTGTT
CACGCTCACCGTGCCCAGTGAGCGAGGACTGCAGCGTAGACGCTTTGTCCAAAATGCCCTAAATGGGAATGG
GGACCCGAACAACATGGATAGAGCAGTTAAACTATACAAGAAGCTCAAAAGGGAAATAACGTTCCATGGGGC
CAAGGAGGTGTCACTAAGCTATTCAACTGGTGCACTTGCCAGTTGCATGGGCCTCATATACAACAGGATGGG
AACAGTGACCACAGAAGCTGCTTTTGGTCTAGTGTGTGCCACTTGTGAACAGATTGCTGATTCACAGCATCG
GTCTCACAGACAAATGGCTACTACCACCAATCCACTAATCAGACATGAAAACAGAATGGTGCTAGCTAGCAC
TACGGCAAAGGCTATGGAACAGATGGCTGGATCGAGTGAACAGGCAGCAGAGGCCATGGAGGTTGCTAATCA
AACTAGGCAGATGGTACATGCAATGAGAACTATTGGGACTCATCCTAGCTCCAGTGCTGGTCTGAAAGATGA
CCTTCTTGAAAATTTGCAGGCTTACCAGAAGCGAATGGGAGTGCAGATGCAGCGATTCAAATGACCCTCTCG
TCATTGCAGCAAATATCATTGGGATCTTGCACCTGATATTGTGGATTACTGATCGTCTTTTTTTCAAATGTA
TTTATCGTCGCTTTAAATACGGTTTGAAAAGAGGGCCTTCTACGGAAGGAGTGCCTGAGTCCATGAGGGAAG
AATATCAACAGGAACAGCAGAGTGCTGTGGATGTTGACGATATTCATTTTGTCAACATAGAGCTAAAGTAA-
-------------------
>A/swine/Michigan/A02216465/2017/1-982
-------------------------ATGAGTCTTCTAACCGAGGTCGAAACGTACGTTCTTTCTATCATCCC
GTCAGGCCCCCTCAAAGCCGAGATCGCGCAGAGACTGGAAAGTGTCTTTGCAGGAAAGAACACAGATCTTGA
GGCTCTCATGGAATGGCTAAAGACAAGACCAATCTTGTCATCTTTGACTAAGGGAATTTTAGGATTTGTGTT
CACGCTCACCGTGCCCAGTGAGCGAGGACTGCAGCGTAGACGCTTTGTCCAAAATGCCTTAAATGGGAATGG
GGACCCAAACAACATGGATAGAGCAGTTAAACTATACAAGAAGCTCAAAAGAGAAATAACGTTCCATGGGGC
CAAGGAGGTGTCACTAAGCTATTCAACTGGTGCACTTGCCAGTTGCATGGGCCTCATATACAACAGGATGGG
AACAGTAACCACAGAAGCTGCTTTTGGTCTAGTGTGTGCCACTTGCGAGCAGATTGCTGATTCACAGCATCG
GTCTCACAGACAAATGGCTACTACCACCAATCCACTAATCAGGCATGAAAACAGAATGGTGCTGGCTAGCAC
TACAGCAAAGGCTATGGAACAGATGGCTGGATCGAGTGAACAGGCAGCAGAGGCCATGGAGGTTGCCAATCA
GACTAGGCAGATGGTACATGCAATGAGAACTATTGGGACTCATCCTAGCTCCAGTGCTGGTCTGAGAGATGA
CCTTCTTGAAAATTTGCAGGCCTACCAGAAACGAATGGGAGTGCAGATGCAGCGATTCAAGTGACCCCCTCG
TCATTGCAGCAAATATCATTGGGATCTTGCACCTGATATTGTGGATCACAGATCGTCTTTTTTTCAAATGCA
TTTATCGTCGCTTTAAATACGGGTTGAAAAGAGGGCCTTCTACGGAAGGAGTGCCTGAGTCCATGAGGGAAG
AATATCAACAGGAACAGCAGAGTGCGGTGGATGTTGACGATGGTCATTTTGTCAACATAGAGCTAGAGTAA-
-------------------
>A/swine/Iowa/A02216456/2017/1-982
-------------------------ATGAGTCTTCTAACCGAGGTCGAAACGTACGTCCTTTCTATCATACC
GTCAGGCCCCCTCAAAGCCGAGATCGCGCAGAGACTGGAAAGTGTCTTTGCAGGAAAGAACACAGATCTCGA
GGCTCTCATGGAATGGCTAAAGACAAGACCAATCTTGTCACCTCTGACTAAAGGAATTTTAGGATTTGTGTT
CACGCTCACCGTGCCCAGTGAGCGAGGACTGCAGCGTAGACGCTTTGTCCAAAATGCCCTAAATGGGAATGG
GGACCCAAACAACATGGATAGAGCAGTTAAACTATACAAGAAGCTCAAAAGAGAAATAACGTTCCATGGGGC
CAAGGAGGTGTCAATAAGCTATTCAACTGGTGCACTTGCCAGTTGCATGGGCCTCATATACAACAGGATGGG
AACAGTGACCACTGAAGCTGCTTTTGGTCTAGTGTGTGCCACTTGTGAACAGATTGCTGATTCTCAGCATCG
GTCTCACAGACAGATGGCTACTACCACCAATCCACTAATCAGGCATGAGAACAGAATGGTGCTAGCTAGCAC
TACGGCAAAGGCTATGGAGCAGATGGCTGGATCGAGTGAACAGGCAGCGGAGGCCATGGAGGTTGCTAATCA
GACTAGACAGATGGTACATGCAATGAGAACTATTGGGACTCATCCTAGCTCTAGTACTGGTCTGAAAGATGA
CCTTCTTGAAAATTTGCAGGCCTACCAGAAGCGAATGGGAGTGCAGATGCAGCGGTTCAAGTGATCCTCTCG
CCATTGCAGCAAATATCATTGGGATCTTGCACCTGATATTGTGGATTACTGATCGTCTTTTTTTCAAATGTA
TTTATCGTCGCTTTAAATACGGTTTGAAAAGAGGGCCTTCTACGGAAGGAGTGCCTGAGTCCATGAGGGAAG
AATATCAACAGGAACAGCAGAGTGCTGTGGATGTTGACGATGGTCATTTTGTCAACATAGAGCTAGAGTAA-
-------------------
>A/swine/Iowa/A02215361/2017/1-982
-------------------------ATGAGTCTTCTAACCGAGGTCGAAACGTACGTTCTTTCTATCATACC
TTCAGGCCCCCTCAAAGCCGAGATCGCGCAGAGACTGGAAAATGTCTTTGCAGGAAAGAACACAGATCTTGA
GGCTCTCATGGAATGGCTAAAGACAAGACCAATCTTGTCACCTCTGACTAAGGGGATTTTAGGATTTGTGTT
CACGCTCACCGTGCCCAGTGAGCGAGGACTGCAGCGTAGACGCTTTGTCCAAAATGCCCTAAATGGGAATGG
GGACCCAAATAACATGGATAGAGCAGTTAAACTATACAAGAAGCTCAAGAGAGAAATAACGTTCCATGGGGC
CAAGGAGGTGTCACTAAGCTATTCAACTGGTGCACTTGCCAGTTGCATGGGCCTCATATACAACAGGATGGG
AACAGTGACCACAGAAGCTGCTTTTGGTCTAGTGTGTGCCACCTGTGAACAGATTGCTGATTCACAGCATCG
GTCTCACAGACAAATGGCTACTACCACCAATCCACTAATCAGGCATGAGAACAGAATGGTGCTGGCTAGCAC
TACTGCAAAGGCTATGGAACAGATGGCTGGATCGAGTGAACAGGCAGCGGAGGCCATGGAGGTTGCTAATCA
GACTAGGCAGATGGTACATGCAATGAGAACTATTGGGACTCATCCTAGCTCCAGTACTGGTCTGAAAGATGA
CCTTCTTGAAAATTTACAGGCCTACCAGAAGCGAATGGGAGTGCAGATGCAGCGATTCAAATGATCCTCTCG
CCATTGCAGCAAATATCATTGGGATCTTGCACCTGATATTGTGGATTACTGATCGTCTTTTTTTCAAATGTA
TTTATCGTTGCTTTAAATACGGTTTGAAAAGAGGGCCTTCTACGGAAGGGGTGCCTGAGTCCATGAGGGAAG
AATATCAACAGGAACAGCAGAGTGCTGTGGATGTTGACGATGGTCATTTTGTCAACATAGAGCTAGAGTAA-
-------------------
>A/swine/Iowa/A02215041/2017/1-982
-------------------------ATGAGTCTTCTAACCGAGGTCGAAACGTACGTTCTTTCTATCATACC
GTCAGGCCCCCTCAAAGCCGAGATTGCGCAGAGACTGGAAAGTGTCTTTGCAGGAAAGAATACAGACCTTGA
GGCTCTCATGGAATGGCTAAAGACAAGACCAATCTTGTCACCTTTGACTAAGGGAATTTTAGGATTTGTGTT
CACGCTCACCGTGCCCAGTGAGCGAGGACTGCAGCGTAGACGCTTTGTCCAAAATGCCCTGAATGGGAATGG
GGACCCAAACAACATGGATAGAGCAGTTAAACTATACAAGAAGCTCAAAAGAGAAATAACGTTCCATGGGGC
CAAGGAGGTGTCACTAAGCTATTCAACTGGTGCACTTGCCAGTTGCATGGGCCTCATATACAACAGGATGGG
AACAGTGACCACAGAAGCTGCCTTTGGTCTAGTGTGTGCCACTTGTGAACAGATTGCTGATTCACAGCATCG
GTCTCACAGACAGATGGCTACAACCACCAATCCACTAATCAGGCATGAGAACAGAATGGTGCTGGCTAGCAC
TACGGCAAAGGCTATGGAACAGATGGCTGGATCAAGTGAACAGGCAGCGGAGGCCATGGAGGTTGCTAATCA
GACTAGGCAGATGGTACATGCAATGAGAACTATTGGGACTCATCCTAGTTCCAGTACTGGTCTGAAAGATGA
CCTTCTTGAAAATTTGCAGGCCTACCAGAAACGAATGGGAGTGCAGATGCAGCGGTTTAAGTGATCCTCTCG
CCATTGCAGCAAATATCATTGGGATCTTGCACCTGATATTGTGGATTACTGATCGTCTTTTTTTCAAATGTA
TTTATCGTCGCTTTAAATACGGTTTGAAAAGAGGGCCTTCTACGGAAGGAGTGCCTGAGTCCATGAGGGAAG
AATATCAACAGGAACAGCAGAGTGCTGTGGATGTTGACGATGGTCATTTTGTCAACATAGAGCTGGAGTAA-
-------------------
>A/swine/North_Carolina/A02216061/2017/1-982
-------------------------ATGAGTCTTCTGACCGAGGTCGAAACGTACGTTCTTTCTATCATCCC
GTCAGGCCCCCTCAAAGCCGAGATCGCGCAGAGACTGGAAAGTGTCTTTGCAGGAAAGAACACAGATCTTGA
GGCTCTCATGGAATGGCTAAAGACAAGACCAATCTTGTCACCTTTGACCAAGGGCATTTTGGGATTTGTGTT
CACGCTCACCGTGCCCAGTGAGCGAGGACTGCAGCGTAGACGCTTTGTCCAAAATGCCCTAAATGGGAATGG
GGACCCAAACAACATGGATAGAGCAGTTAAACTATACAAGAAGCTCAAAAGAGAAATAACGTTCCATGGGGC
CAAGGAGGTGTCATTAAGCTATTCAACTGGTGCACTTGCCAGTTGCATGGGCCTCATATACAACAGGATGGG
AACAGTAACCACAGAAGCTGCTTTTGGTTTAGTATGTGCCACTTGTGAACAGATAGCTGATTCACAGCATCG
GTCTCACAGACAAATGGCTACTACCACCAATCCACTAATCAGACATGAAAACAGAATGGTGCTGGCTAGCAC
TACGGCAAAGGCCATGGAACAAATGGCTGGATCGAGTGAACAGGCAGCAGAGGCCATGGAGGTTGCTAATCA
GACTAGGCAGATGGTACATGCAATGAGAACTATTGGGACTCATCCTAGCTCCAGTGCTGGTCTGAAAGATGA
CCTTATTGAAAATTTGCAGGCATACCAGAAACGAATGGGAGTGCAGATGCAGCGATTCAAGTGATCCTCTCG
TTATCGCAGCAAATATCATTGGGATCTTGCACCTGATATTGTGGATTACAGATCGTCTTTTTTTCAAATGCA
TTTATCGTCGCTTTAGATACGGGTTGAAAAGAGGGCCTTCTACGGAAGGAGTGCCTGAGTCCATGAGGGAAG
AATATCAACAGGAACAGCAGAGTGCGGTGGATGTTGACGATGGTCATTTTGTCAACATAGAGCTAGAGTAA-
-------------------
>A/swine/USA/A01812270/2017/1-982
-------------------------ATGAGTCTTCTAACCGAGGTCGAAACGTACGTCCTTTCTATCATACC
ATCAGGCCCCCTCAAAGCCGAGATCGCGCAGAGACTGGAAAGTGTATTTGCAGGAAAGAACACAGATCTTGA
GGCTCTCATGGAATGGCTAAAGACAAGACCAATCTTGTCACCTCTGACTAAAGGGATTTTAGGATTTGTGTT
CACGCTCACCGTGCCCAGTGAGCGAGGACTGCAGCGTAGACGCTTTGTCCAAAATGCCCTAAATGGAAATGG
GGACCCAAACAACATGGATAGAGCAGTTAAACTGTACAAGAAGCTCAAAAGAGAAATAACGTTCCATGGGGC
CAAGGAGGTGTCACTAAGCTATTCAACTGGTGCACTTGCCAGTTGCATGGGCCTCATATACAACAGGATGGG
AACAGTGACCACAGAAGCTGCTTTTGGTCTAGTGTGTGCCACTTGTGAACAGATCGCTGATTCTCAGCATCG
GTCTCACAGACAGATGGCTACTACCACCAATCCACTAATCAGGCATGAGAACAGAATGGTGCTAGCTAGCAC
TACGGCAAAGGCTATGGAACAGATGGCTGGATCGAGTGAACAGGCAGCGGAGGCCATGGAGGTTGCTAATCA
GACTAGGCAGATGGTACATGCAATGAGAACTATTGGGACTCATCCTAGCTCCAGTACTGGTCTGAAAGATGA
CCTTCTTGAAAATTTGCAGGCCTACCAGAAGCGGATGGGAGTGCAGATGCAGCGGTTCAAGTGACCCTCTCG
CCATTGCAGCAAATATCATTGGGATCTTGCACCTGATATTGTGGATTACTGATCGTCTTTTTTTCAAATGTA
TTTATCGTCGCTTTAAATACGGTTTGAAAAGAGGGCCTTCTACGGAAGGAGTGCCTGAGTCCATGAGGGAAG
AGTATCAACAGGAACAGCAGAGTGCTGTGGATGTTGACGATGGTCATTTTGTCAACATAGAGCTAGAGTAA-
-------------------
>A/swine/USA/A01812271/2017/1-982
-------------------------ATGAGTCTTCTAACCGAGGTCGAAACGTACGTTCTTTCTATCATACC
GTCAGGCCCCCTCAAAGCCGAGATCGCGCAGAGACTGGAAAGTGTCTTTGCAGGAAAGAATACAGACCTTGA
GGCTCTCATGGAATGGCTAAAGACAAGACCAATCTTGTCACCTTTAACTAAGGGAATTTTAGGATTTGTGTT
CACGCTCACCGTGCCCAGTGAGCGAGGACTGCAGCGTAGACGCTTTGTCCAAAATGCCCTGAATGGGAATGG
GGACCCAAACAACATGGATAGAGCAGTTAAACTATACAAGAAGCTCAAAAGAGAAATAACGTTCCATGGGGC
CAAGGAGGTGTCACTAAGCTATTCAACTGGTGCACTTGCCAGTTGCATGGGCCTCATATACAACAGGATGGG
AACAGTGACCACAGAAGCTGCTTTTGGTCTAGTGTGTGCCACTTGTGAACAGATTGCTGATTCGCAGCATCG
GTCTCACAGACAGATGGCTACAACCACCAATCCACTAATCAGGCATGAGAACAGAATGGTGCTGGCTAGCAC
TACGGCAAAGGCTATGGAACAGATGGCTGGATCGAGTGAACAGGCAGCGGAGGCCATGGAGGTTGCTAATCA
GACTAGGCAGATGGTACATGCAATGAGAACTATTGGGACTCATCCTAGTTCCAGTACTGGTCTGAAAGATGA
CCTTCTTGAAAATTTGCAGGCCTATCAGAAGCGAATGGGAGTGCAGATGCAGCGGTTTAAGTGATCCTCTCG
CCATTGCAGCAAATATCATTGGGATCTTGCACCTGATATTGTGGATTACTGATCGTCTTTTTTTCAAATGTA
TTTATCGTCGCTTTAAATACGGTTTGAAAAGAGGGCCTTCTACGGAAGGAGTGCCTGAGTCCATGAGGGAAG
AATATCAACAGGAACAGCAGAGTGCTGTGGATGTTGACGATGGTCATTTTGTCAACATAGAGCTGGAGTAA-
-------------------
>A/swine/USA/A01812269/2017/1-982
-------------------------ATGAGTCTTCTAACCGAGGTCGAAACGTACGTTCTTTCTATCATCCC
GTCAGGCCCCCTCAAAGCCGAGATCGCGCAGAGACTGGAGAGTGTCTTTGCAGGAAAGAACACAGATCTTGA
GGCTCTCATGGAATGGCTAAAGACAAGACCAATCTTGTCACCTTTGACTAAGGGAATTTTAGGATTTGTGTT
CACGCTCACCGTGCCCAGTGAGCGAGGACTGCAGCGTAGACGCTTTGTCCAAAATGCCCTAAATGGGAATGG
GGACCCAAACAACATGGATAGAGCAGTCAAACTATACAAGAAGCTCAAAAGAGAAATAACGTTCCATGGGGC
CAAAGAGGTGTCACTAAGCTATTCAACTGGTGCACTTGCCAGTTGCATGGGCCTCATATATAACAGGATGGG
AACAGTAACCACAGAAGCTGCTTTTGGTCTAGTATGTGCCACTTGTGAACAGATTGCTGATTCACAGCATCG
GTCTCACAGACAAATGGTCACTACCACCAATCCACTAATCAGGCATGAAAACAGAATGGTGCTGGCTAGCAC
TACGGCAAAGGCTATGGAACAGATGGCTGGATCGAGTGAACAGGCAGCAGAGGCCATGGAGGTTGCTAATCA
GACTAGGCAGATGGTACATGCAATGAGGACTATTGGGACTCATCCTAGCTCCAGTGCTGGTCTGAAAGATGA
CCTTCTTGAAAATTTGCAGGCCTACCAGAAACGAATGGGAGTGCAGATGCAGCGATTCAAGTGATCCTCTCG
TCATTGCAGCAAATATCATTGGAATCTTGCACCTGATATTGTGGATTACAGATCGTCTTTTTTTCAAATGCA
TTTATCGTCGCTTTAAATACGGGTTGAAAAGAGGGCCTTCTACGGAAGGAGTGCCTGAGTCCATGAGGGAAG
AATATCAACAGGAACAGCAGAGTGCGGTGGATGTTGACGATGGTCATTTTGTCAACATAGAGCTAGAGTAA-
-------------------
>A/swine/North_Carolina/A02218550/2017/1-982
-------------------------ATGAGTCTTCTAACCGAGGTCGAAACGTACGTTCTTTCTATCATCCC
GTCAGGCTCCCTCAAAGCCGAGATCGCGCAGAGACTGGAAAGTGTTTTTTCAGGAAAGAACACAGATCTTGA
GGCTCTCATGGAATGGCTAAAGACAAGACCAATCTTGTCACCTCTGACTAAGGGGATTTTAGGATTTGTGTT
CACGCTCACCGTGCCCAGCGAGCGAGGACTGCAGCGTAGACGCTTTGTCCAAAATGCCCTAAATGGGAATGG
GGACCCTAACAACATGGATAGAGCAGTTAAACTATACAAGAAGCTCAAAAGAGAAATAACGTTTCATGGGGC
CAAGGAGGTGTCACTAAGCTATTCAACTGGTGCACTTGCCAGTTGCATGGGCCTCATATACAACAGGATGGG
AACAGTGACCACAGAAGCTGCCTTTGGTCTGGTGTGTGCCACTTGTGAACAGATTGCTGATTCACAGCATCG
GTCTCACAGACAAATGGCTACTACCACCAATCCACTAATCAGACATGAAAACAGAATGGTGCTGGCTAGCAC
TACGGCAAAGGCTATGGAACAAATGGCTGGATCGAGTGAACAGGCAGCAGAGGCCATGGAGGTTGCTAATCA
AACTAGGCAGATGGTACATGCAATGAGAACTATTGGGACTCATCCTAGCTCCAGTGCTGGTCTGAAAGATGA
CCTTCTTGAAAATTTGCAGGCCTACCAGAAGCGAATGGGAGTGCAGATGCAGCGATTCAAATGACCCTCTCG
TCATCGCAGCAAATATCATTGGGATCTTGCACCTGATATTGTGGATTACTGATCGTCTTTTTTTCAAATGTA
TTTATCGTCGCTTTAAATACGGTTTGAAAAGAGGGCCTTCTACGGAAGGAGTGCCTGAGTCCATGAGGGAAG
AATATCAACAGGAACAGCAGAGTGCTGTGGATGTTGACGATGGTCATTTTGTCAACATAGAGCTAGAGTAA-
-------------------
>A/swine/Oklahoma/A01785279/2017/1-982
-------------------------ATGAGTCTTCTAACCGAGGTCGAAACGTACGTTCTTTCTATCATCCC
GTCAGGCTCCCTCAAAGCCGAGATCGCGCAGAGACTGGAAAGTGTTTTTTCAGGGAAAAATACAGATCTTGA
GGCTCTCATGGAATGGCTAAAGACAAGGCCAATCTTGTCACCTCTGACTAAGGGGATTTTAGGATTTGTGTT
CACGCTCACCGTGCCCAGTGAGCGAGGACTGCAGCGTAGACGCTTTGTCCAAAATGCCCTAAATGGGAATGG
GGACCCGAACAACATGGATAGAGCAGTTAAACTATACAAGAAGCTCAAAAGAGAAATAACGTTCCATGGGGC
CAAGGAGGTGTCACTAAGCTATTCAACTGGTGCACTTGCCAGTTGCATGGGCCTCATATACAACAGGATGGG
AACAGTGACCACAGAAGCTGCTTTTGGTCTGGTGTGTGCCACTTGTGAACAGATTGCTGATTCACAGCATCG
GTCTCACAGACAAATGGCTACTACCACCAATCCACTAATCAGGCATGAAAACAGAATGGTGCTGGCTAGCAC
TACGGCAAAGGCTATGGAACAGATGGCTGGATCGAGTGAACAGGCAGCAGAGGCCATGGAGGTTGCTAATCA
AACTAGGCAGATGGTACATGCAATGAGAACTATTGGGACTCATCCTAGCTCCAGTGCTGGTCTGAAAGATGA
CCTTCTTGAAAATTTACAGGCCTACCAGAAGCGAATGGGAGTGCAGATGCAGCGATTCAAGTGATCCTCTCG
TCATTGCAGCAAATATCATTGGGATCTTGCACCTGATATTGTGGATTACTGATCGTCTTTTTTTCAAATGTA
TTTATCGTCGCTTTAAATACGGTTTGAAAAGAGGGCCTTCTACGGAAGGAGTGCCTGAGTCCATGAGGGAAG
AATATCAACAGGAACAGCAGAGTGCTGTGGATGTTGACGATGGTCATTTTGTCAACATAGAGCTAGAGTAA-
-------------------
>A/swine/Illinois/A02218189/2017/1-982
-------------------------ATGAGTCTTCTAACCGAGGTCGAAACGTACGTTCTTTCTATCATACC
GTCAGGCCCCCTCAAAGCCGAGATAGCGCAGAGACTGGAAAGTGTCTTTGCAGGAAAGAATACAGACCTTGA
GGCTCTCATGGAATGGCTAAAGACAAGACCAATCTTGTCACCTTTGACTAAGGGAATTTTAGGATTTGTGTT
CACGCTCACCGTGCCCAGTGAGCGAGGACTGCAGCGTAGACGCTTTGTCCAAAATGCCCTGAATGGGAATGG
GGACCCAAACAACATGGATAGAGCAGTTAAACTATACAAGAAACTCAAAAGAGAAATAACGTTCCATGGGGC
CAAGGAGGTGTCACTAAGCTATTCAACTGGTGCACTTGCCAGTTGCATGGGCCTCATATACAACAGGATGGG
AACAGTGACCACAGAAGCTGCTTTTGGTCTAGTGTGTGCCACTTGTGAACAGATTGCTGATTCACAGCATCG
GTCTCACAGACAGATGGCTACAACCACCAATCCACTAATCAGGCATGAGAACAGAATGGTGCTGGCTAGCAC
TACGGCAAAGGCTATGGAACAGATGGCTGGATCAAGTGAACAGGCAGCGGAGGCCATGGAGGTTGCTAATCA
GACTAGGCAGATGGTACATGCAATGAGAACTATTGGGACTCATCCTAGTTCCAGTACTGGTCTGAAAGATGA
CCTTCTTGAAAATTTGCAGGCCTATCAGAAACGAATGGGAGTGCAGATGCAGCGGTTTAAGTGATCCTCTCG
CCATTGCAGCAAATATCATTGGGATCTTGCACCTGATATTGTGGATTACTGATCGTCTTTTTTTCAAATGTA
TTTATCGTCGCTTTAAATACGGTTTGAAAAGAGGGCCTTCTACGGAAGGAGTGCCTGAGTCCATGAGGGAAG
AATATCAACAGGAACAGCAGAGTGCTGTGGATGTTGACGATGGTCATTTTGTCAACATAGAGCTGGAGTAA-
-------------------
>A/swine/Illinois/A02218757/2017/1-982
-------------------------ATGAGTCTTCTAACCGAGGTCGAAACGTACGTTCTTTCTATCATACC
GTCAGGCCCCCTCAAAGCCGAGATTGCGCAGAGACTGGAAAGTGTCTTTGCAGGGAAGAACACAGATCTTGA
GGCTCTCATGGAATGGCTAAAGACAAGACCAATCTTGTCACCTCTGACTAAGGGAATTTTAGGATTTGTGTT
CACGCTCACCGTGCCCAGTGAGCGAGGACTGCAGCGTAGACGCTTCGTCCAAAATGCCCTGAATGGGAATGG
GGACCCAAACAACATGGATAGAGCAGTTAAACTATACAAGAAGCTCAAAAGAGAAATAACGTTCCATGGGGC
CAAGGAGGTGTCACTAAGCTATTCAACTGGTGCACTTGCCAGTTGCATGGGCCTCATATACAACAGAATGGG
AACAGTGACCACAGAAGCCGCTTTTGGTCTAGTGTGTGCCACTTGTGAACAGATTGCTGATTCACAGCATCG
GTCTCACAGACAGATGGCTACAACCACCAATCCACTAATCAGGCATGAGAACAGAATGGTGCTGGCTAGCAC
TACGGCAAAGGCTATGGAACAGATGGCTGGATCGAGTGAACAGGCAGCGGAGGCCATGGAGGTTGCTAATCA
GACTAGGCAGATGGTACATGCAATGAGAACTATTGGGACTCACCCTAGCTCCAGTACTGGTCTGAAAGATGA
CCTTCTTGAAAATTTGCAGGCCTACCAGAAGCGAATGGGAGTGCAGATGCAGCGATTCAAGTGATCCTCTCG
TCATTGCAGCAAATATCATTGGGATTTTGCACCTGATATTGTGGATTACTGATCGTCTTTTTTTCAAATGTA
TTTATCGTCGCTTTAAATACGGTTTGAAAAGAGGGCCTTCTACGGAAGGAGTGCCTGAGTCCATGAGGGAAG
AATATCAACAGGAACAGCAGAGTGCTGTGGATGTTGACGATGGTCATTTTGTCAACATAGAGCTAGAGTAA-
-------------------
>A/swine/Iowa/A02218429/2017/1-982
-------------------------ATGAGTCTTCTAACCGAGGTCGAAACGTACGTTCTTTCTATCATCCC
GTCAGGCCCCCTCAAAGCCGAGATCGCGCAGAGACTGGAAAGTGTATTTGCAGGAAAGAACACAGATCTTGA
GGCTCTCATGGAATGGCTAAAGACAAGACCAATCTTGTCACCTTTGACTAAGGGAATTTTAGGATTTGTGTT
CACGCTCACCGTGCCCAGTGAGCGAGGACTGCAGCGTAGACGCTTTATCCAAAATGCCCTAAATGGGAATGG
GGACCCAAACAACATGGATAGAGCAGTCAAACTATACAAGAAGCTCAAAAGAGAAATAACGTTCCATGGGGC
CAAGGAGGTGTCACTAAGCTATTCAACTGGTGCACTTGCCAGCTGCATGGGCCTCATATATAACAGGATGGG
AACAGTAACCACAGAAGCTGCTTTTGGTCTAGTATGTGCCACTTGTGAACAGATTGCTGATTCACAGCATCG
GTCTCACAGACAAATGGCCACTACCACCAATCCACTAATCAGGCATGAAAACAGAATGGTGCTGGCTAGCAC
TACGGCAAAGGCTATGGAACAGATGGCTGGATCGAGTGAACAGGCAGCAGAAGCCATGGAGGTTGCTAATCA
GACTAGGCAGATGGTACATGCAATGAGAACTATTGGGACTCATCCTAGCTCCAGTGCTGGTCTGAAAGATGA
CCTTCTTGAAAATTTGCAGGCCTACCAGAAACGAATGGGAGTGCAGATGCAGCGATTCAAGTGATCCTCTCG
TCATTGCAGCAAATATCATTGGGATCTTGCACCTGATATTGTGGATTACAGATCGTCTTTTTTTCAAATGCA
TTTATCGTCGCTTTAAATACGGGTTGAAAAGAGGGCCTTCTACGGAAGGAGTGCCTGAGTCCATGAGGGAAG
AATATCAACAGGAGCAGCAGAGTGCGGTGGATGTTGACGATGGTCATTTTGTCAACATAGGGCTAGAGTAA-
-------------------
>A/swine/North_Carolina/A02218135/2017/1-982
-------------------------ATGAGTCTTCTAACCGAGGTCGAAACGTACGTTCTTTCTATCATACC
GTCAGGCCCCCTCAAAGCCGAGATCGCGCAGAGACTGGAAAGTGTCTTTGCAGGAAAGAACACAGATCTTGA
GGTTCTCATGGAATGGCTAAAGACAAGACCAATCTTGTCACCTCTGACTAAGGGAATTTTAGGATTTGTGTT
CACGCTCACCGTGCCCAGTGAGCGAGGACTGCAGCGTAGACGCTTTGTCCAAAATGCCCTGAATGGGAATGG
GGACCCAAACAACATGGATAGAGCAGTTAAACTATACAAGAAGCTCAAAAGAGAAATAACGTTCCATGGGGC
CAAGGAGGTGTCATTAAGCTATTCAACTGGTGCACTTGCCAGTTGCATGGGCCTCATATACAACAGGATGGG
AACAGTGACCACAGAAGCTGCTTTTGGTCTAGTGTGTGCCACTTGTGAACAGATTGCTGATTCACAGCATCG
GTCTCACAGACAAATGGCTACAACCACCAATCCACTAATCAGGCATGAGAACAGAATGGTGCTGGCTAGCAC
TACGGCAAAGGCTATGGAACAGATGGCTGGATCGAGCGAACAGGCAGCGGAGGCCATAGAGGTTGCTAATCA
GACTAGACAGATGGTACATGCAATGCGAACTATTGGGACTCATCCTAGCTCCAGTACTGGTCTGAAAGATGA
CCTTCTTGAAAATTTGCAGGCCTACCAGAAGCGAATGGGAGTGCAAATGCAGCGATTCAAGTGATCCTCTCG
CCATTGCAGCAAACATCATTGGGATCTTGCACCTGACATTGTGGATTACTGATCGTCTTTTTTTCAAATGTA
TTTATCGTCGCTTTAAATACGGTTTGAAAAGAGGGCCTTCTACGGAAGGAGTGCCTGAGTCCATGAGGGAAG
AATATCAACAGGAACAGCAGAGTGCTGTGGATGTTGACGATGGTCATTTTGTCAACATAGAGCTAAAGTAA-
-------------------
>A/swine/Iowa/A02218750/2017/1-982
-------------------------ATGAGTCTTCTAACCGAGGTCGAAACGTACGTTCTTTCTGTCATACC
GTCAGGCCCCCTCAAAGCCGAGATTGCGCAGAGACTGGAAAGTGTCTTTGCAGGAAAGAACACAGATCTTGA
GGCTCTCATGGAATGGCTAAAGACAAGACCAATCTTGTCACCTCTGACTAAGGGAATTTTAGGATTTGTGTT
CACGCTCACCGTGCCCAGTGAGCGAGGACTGCAGCGTAGACGCTTTATTCAAAATGCCCTGAATGGGAATGG
GGACCCAAACAATATGGATAGAGCAGTTAAACTATACAAGAAGCTCAAAAGAGAAATAACATTCCATGGGGC
CAAGGAGGTGTCACTAAGCTATTCAACTGGTGCACTTGCCAGTTGCATGGGCCTCATATACAACAGGATGGG
AACAGTGACCACAGAAGCTGCTTTTGGTCTAGTGTGTGCCACTTGTGAACAGATTGCTGATTCACAGCATCG
GTCTCACAGACAGATGGCTACAACCACCAATCCACTAATCAGGCATGAGAACAGAATGGTGCTGGCTAGCAC
TACGGCAAAGGCTATGGAACAGATGGCTGGATCGAGTGAACAGGCAGCGGAGGCCATGGAGGTTGCTAATCA
AACTAGGCAGATGGTACATGCAATGAGAACTATTGGGACTCATCCTAGCTCCAGTACTGGTCTGAAAGATGA
CCTTCTTGAAAATTTGCAGGCCTACCAGAAGCGAATGGGAGTGCAGATGCAGCGATTCAAGTGATCCTCTCG
CCATTGCAGCAAATATCATTGGGATCTTGCACTTGATATTGTGGATTACTGATCGTCTTTTTTTCAAATGTA
TTTATCGTCGCTTTAAATACGGTTTGAAAAGAGGGCCTTCTACGGAAGGAGTGCCTGAGTCCATGAGGGAAG
AATATCAACAGGAACAGCAGAGTGCTGTGGATGTTGACGATGGTCATTTTGTCAACATAGAGCTAGAGTAA-
-------------------
>A/swine/Iowa/A02218752/2017/1-982
-------------------------ATGAGTCTTCTAACCGAGGTCGAAACGTACGTTCTTTCTATCATACC
GTCAGGCCCCCTCAAAGCCGAGATTGCGCAGAGACTGGAAAGTGTCTTTGCAGGAAAGAATACAGACCTTGA
GGCTCTCATGGAATGGCTAAAGACAAGACCAATCTTGTCACCTTTGACTAAGGGAATTTTAGGATTTGTGTT
CACGCTCACCGTGCCCAGTGAGCGAGGACTGCAGCGTAGACGCTTTGTCCAAAATGCCCTGAATGGGAATGG
GGACCCAAACAACATGGATAGAGCAGTTAAACTATACAAGAAGCTCAAAAGAGAAATAACGTTCCATGGGGC
CAAGGAGGTGTCACTAAGCTATTCAACTGGTGCACTTGCCAGTTGCATGGGCCTCATATACAACAGGATGGG
AACAGTGACCACAGAAGCTGCTTTTGGTCTAGTGTGTGCCACTTGTGAACAGATTGCTGACTCACAGCATCG
GTCTCACAGACAGATGGCTACAACCACCAATCCATTAATCAGGCATGAGAACAGAATGGTGCTGGCTAGCAC
TACGGCAAAGGCTATGGAACAGATGGCTGGATCGAGTGAACAGGCAGCGGAGGCCATGGAGGTTGCCAATCA
GACTAGGCAGATGGTACATGCAATGAGAACTATTGGGACTCATCCTAGTTCCAGTACTGGTCTGAAAGATGA
CCTTCTTGAAAATTTGCAGGCCTATCAGAAACGAATGGGAGTGCAGATGCAGCGGTTTAAGTGATCCTCTCG
CCATTGCAGCAAATATCATTGGGATATTGCACCTGATATTGTGGATTACTGATCGTCTTTTTTTCAAATGTA
TTTATCGTCGCTTTAAATACGGTTTGAAAAGAGGGCCTTCTACGGAAGGAGTGCCTGAGTCCATGAGGGAAG
AATATCAACAGGAACAGCAGAGTGCTGTGGATGTTGACGATGGTCATTTTGTCAACATAGAGCTGGAGTAA-
-------------------
>A/swine/Arkansas/A02218161/2017/1-982
-------------------------ATGAGTCTTCTGACCGAGGTCGAAACGTACGTTCTTTCTATCATCCC
GTCAGGCTCCCTCAAAGCCGAGATCGCGCAGAGACTGGAAAGTGTTTTTTCAGGAAAGAACACAGATCTTGA
GGCTCTCATGGAATGGCTAAAGACAAGACCAATCTTGTCACCTCTGACCAAGGGGATTTTAGGATTTGTGTT
CACGCTCACCGTGCCCAGTGAGCGAGGACTGCAGCGTAGACGCTTTGTCCAAAATGCCCTAAATGGGAATGG
GGACCCGAACAACATGGATAGAGCAGTTAAACTATACAAGAAGCTCAAAAGAGAAATAACGTTCCATGGGGC
CAAGGAGGTGTCACTAAGCTATTCAACTGGTGCACTTGCCAGTTGCATGGGCCTCATATACAACAGGATGGG
AACAGTGACCACAGAAGCTGCTTTTGGTCTAGTGTGTGCCACTTGTGAGCAGATTGCTGATTCACAGCATCG
GTCTCACAGACAAATGGCTACTACCACCAATCCACTAATCAGACATGAAAACAGAATGGTGCTAGCTAGCAC
TACGGCAAAGGCTATGGAACAGATGGCTGGATCGAGTGAACAGGCAGCAGAGGCCATGGAGGTTGCTAATCA
AACTAGGCAGATGGTACATGCAATGAGAACTATTGGGACTCATCCTAGCTCCAGTGCTGGTCTGAAAGATGA
CCTTCTTGAAAATTTGCAGGCTTACCAGAAGCGAATGGGAGTGCAGATGCAGCGATTCAAATGACCCTCTCG
TCATTGCAGCAAATATCATTGGGATCTTGCACCTGATATTGTGGATTACTGATCGTCTTTTTTTCAAATGTA
TTTATCGTCGCTTTAAATACGGTTTGAAAAGAGGGCCTTCTACGGAAGGAGTGCCTGAGTCCATGAGGGAAG
AATATCAACAGGAACAGCAGAGTGCTGTGGATGTTGACGATAGTCATTTTGTCAACATAGAGCTAGAGTAA-
-------------------
>A/swine/Iowa/A02218753/2017/1-982
-------------------------ATGAGTCTTCTGACCGAGGTCGAAACGTACGTTCTTTCTATCATCCC
GTCAGGCCCCCTCAAAGCCGAGATCGCGCAGAGACTGGAAAGTGTCTTTGCAGGAAAGAACACAGATCTTGA
GGCTCTCATGGAATGGCTAAAGACAAGACCAATCTTGTCACCTTTGACCAAAGGCATTTTGGGATTTGTGTT
CACGCTCACCGTGCCCAGTGAGCGAGGACTGCAGCGTAGACGCTTTGTCCAAAATGCCCTAAATGGGAATGG
GGACCCAAACAACATGGATAGAGCAGTTAAACTATACAAGAAGCTCAAAAGAGAAATAACGTTCCATGGGGC
CAAGGAGGTGTCACTAAGCTATTCAACTGGTGCACTTGCCAGTTGCATGGGCCTCATATACAACAGGATGGG
AACAGTAACCACAGAAGCTGCTTTTGGTTTAGTATGTGCCACTTGTGAACAGATAGCTGATTCACAGCATCG
GTCTCACAGACAAATGGCTACTACCACCAATCCACTAATCAGACATGAAAACAGAATGGTGCTGGCTAGCAC
TACGGCAAAGGCCATGGAACAGATGGCTGGATCGAGTGAACAGGCAGCAGAGGCCATGGAGGTTGCTAATCA
GACTAGGCAGATGGTACATGCAATGAGAACTGTTGGGACTCATCCTAGCTCCAGTGCTGGTCTGAAAGATGA
CCTTCTTGAAAATTTGCAGGCCTACCAGAAACGAATGGGAGTGCAGATGCAGCGATTCAAGTGATCCTCTCG
TCATCGCAGCAAATATCATTGGGATCTTGCACCTGATATTGTGGATTACAGATCGTCTTTTTTTCAAATGCA
TTTATCGTCGCTTTAGATACGGGTTGAAAAGAGGGCCTTCTACGGAAGGAGTGCCTGAGTCCATGAGGGAAG
AATATCAACAGGAACAGCAGAGTGCGGTGGATGTTGACGATGGTCATTTTGTCAACATAGAGCTAGAGTAA-
-------------------
>A/swine/Iowa/A02218171/2017/1-982
-------------------------ATGAGTCTTCTAACCGAGGTCGAAACGTACGTTCTTTCTATCATCCC
GTCAGGCTCCCTCAAAGCCGAGATCGCGCAGAGACTGGAAAGTGTTTTTTCAGGAAAGAACACAGATCTTGA
GGCCCTCATGGAATGGCTAAAGACAAGACCAATCTTGTCACCTCTGACCAAGGGGATTTTAGGATTTGTGTT
CACGCTCACCGTGCCCAGTGAGCGAGGACTGCAGCGTAGACGCTTTGTCCAAAATGCCCTAAATGGGAATGG
GGACCCGAACAACATGGATAGAGCAGTTAAACTATACAAGAAGCTCAAAAGGGAAATAACGTTCCATGGGGC
CAAGGAGGTGTCACTAAGCTATTCAACTGGTGCACTTGCCAGTTGCATGGGCCTCATATACAACAGGATGGG
AACAGTGACCACAGAAGCTGCTTTTGGTCTAGTGTGTGCCACTTGTGAACAGATTGCTGATTCACAGCATCG
GTCTCACAGACAAATGGCTACTACCACCAATCCACTAATCAGACATGAAAACAGAATGGTGCTAGCTAGCAC
TACGGCAAAGGCTATGGAACAGATGGCTGGATCGAGTGAACAGGCAGCAGAGGCCATGGAGGTTGCTAATCA
AACTAGGCAGATGGTACATGCAATGAGAACTATTGGGACTCATCCTAGCTCCAGTGCTGGTCTGAAAGATGA
CCTTCTTGAAAATTTGCAGGCTTACCAGAAGCGAATGGGAGTGCAGATGCAGCGATTCAAATGACCCTCTCG
TCATTGCAGCAAATATCATTGGGATCTTGCACCTGATATTGTGGATTACTGATCGTCTTTTTTTCAAATGTA
TTTATCGTCGCTTTAAATACGGTTTGAAAAGAGGGCCTTCTACGGAAGGAGTGCCTGAGTCCATGAGGGAAG
AATATCAACAGGAACAGCAGAGTGCTGTGGATGTTGACGATATTCATTTTGTCAACATAGAGCTAAAGTAA-
-------------------
>A/swine/Iowa/A02218428/2017/1-982
-------------------------ATGAGTCTTCTAACCGAGGTCGAAACGTACGTTCTTTCTATCATCCC
GTCAGGCTCCCTCAAAGCCGAGATCGCGCAGAGACTGGAAAGTGTTTTTTCAGGAAAGAACACAGATCTTGA
GGCTCTCATGGAATGGCTAAAGACAAGACCAATCTTGTCACCTCTGACCAAGGGGATTTTAGGATTTGTGTT
CACGCTCACCGTGCCCAGTGAGCGAGGACTGCAGCGTAGACGCTTTGTCCAAAATGCCCTAAATGGGAATGG
GGACCCGAACAACATGGATAGAGCAGTTAAACTATACAAGAAGCTCAAAAGAGAAATAACGTTCCATGGGGC
CAAGGAGGTGTCACTAAGCTATTCAACTGGTGCACTTGCCAGTTGCATGGGCCTCATATACAACAGGATGGG
AACAGTGACCACAGAAGCTGCTTTTGGTCTAGTGTGTGCCACTTGTGAGCAGATTGCTGATTCACAGCATCG
GTCTCACAGACAAATGGCTACTACCACCAATCCACTAATCAGACATGAAAACAGAATGGTGCTAGCTAGCAC
TACGGCAAAGGCTATGGAACAGATGGCTGGATCGAGTGAACAGGCAGCAGAGGCCATGGAGGTTGCTAGTCA
AACTAGGCAGATGGTACATGCAATGAGAACTATTGGGACTCATCCTAGCTCCAGTGCTGGTCTGAAAGATGA
CCTTCTTGAAAATTTGCAGGCTTACCAGAAGCGAATGGGAGTGCAGATGCAGCGATTCAAATGACCCTCTCG
TCATTGCAGCAAATATCATTGGGATCTTGCACCTGATATTGTGGATTACTGATCGTCTTTTTTTTAAATGTA
TTTATCGTCGCTTTAAATACGGTTTGAAAAGAGGGCCTTCTACGGAAGGAGTGCCTGAGTCCATGAGGGAAG
AATATCAACAGGAACAGCAGAGTGCTGTGGATGTTGACGATAGTCATTTTGTCAACATAGAGCTAAAGTAA-
-------------------
>A/swine/Iowa/A02218755/2017/1-982
-------------------------ATGAGTCTTCTAACCGAGGTCGAAACGTACGTTCTTTCTATCATCCC
GTCAGGCCCCCTCAAAGCCGAGATCGCGCAGAGACTGGAAAGTGTATTTGCAGGAAAGAACACAGATCTTGA
GGCTCTCATGGAATGGCTAAAGACAAGACCAATCTTGTCACCTCTGACTAAGGGAATTTTAGGATTTGTGTT
CACGCTCACCGTGCCCAGTGAGCGAGGACTGCAGCGTAGACGCTTTGTCCAAAATGCCCTAAATGGGAATGG
GGACCCGAACAACATGGATAGAGCAGTTAAACTATACAAGAAGCTCAAAAGAGAAATAACGTTCCATGGGGC
TAAGGAGGTGTCACTAAGCTATTCAACTGGTGCACTTGCCAGTTGCATGGGCCTCATATACAACAGAATGGG
AACAGTAACCACAGAGGCTGCTTTTGGTCTAGTGTGTGCCACTTGTGAACAGATTGCTGATTCACAGCATCG
ATCTCACAGACAAATGGCTACTACCACCAATCCACTAATCAGGCATGAAAACAGAATGGTGCTGGCTAGCAC
TACTGCAAAGGCTATGGAACAGATGGCTGGATCGAGTGAACAGGCAGCAGAGGCCATGGAGGTTGCTAATCA
GACTAGGCAGATGGTACATGCAATGAGAACTATTGGGACTCATCCTAGCTCCAGTGCTGGTCTGAAGGATGA
CCTTCTTGAAAATTTACAGGCCTACCAGAAGCGAATGGGAGTGCAAATGCAGCGATTCAAGTGATCCTCTCG
TCATTGCAGCAAATATCATTGGGATCTTGCACCTGATATTGTGGATTACTGATCGTCTTTTTTTCAAATGTA
TTTATCGTCGCTTTAAATACGGTTTGAAAAGAGGGCCTTCTACGGAAGGAGTGCCTGAGTCCATGAGGGAAG
AATATCAACAGGAACAGCAGAGTGCTGTGGATGTTGACGATGGTCATTTTGTCAACATAGAGCTAGAGTAA-
-------------------
>A/swine/Iowa/A02218427/2017/1-982
-------------------------ATGAGTCTTCTGACCGAGGTCGAAACGTACGTTCTTTCTATCATCCC
GTCAGGCCCCCTCAAAGCCGAGATCGCGCAGAGACTGGAAAGTGTCTTTGCAGGAAAGAACACAGATCTTGA
GGCTCTCATGGAATGGCTAAAGACAAGACCAATCTTGTCACCTTTGACCAAGGGCATTTTGGGATTTGTGTT
CACGCTCACCGTGCCCAGTGAGCGAGGACTGCAGCGTAGACGCTTTGTCCAAAATGCCCTAAATGGGAATGG
GGACCCAAACAACATGGATAGAGCAGTTAAACTATACAAGAAGCTCAAAAGAGAAATAACGTTCCATGGGGC
CAAGGAGGTGTCACTAAGCTATTCAACTGGTGCACTTGCCAGTTGCATGGGCCTCATATACAACAGGATGGG
AACAGTAACCACAGAAGCTGCTTTTGGTTTAGTATGTGCCACTTGTGAACAGATAGCTGATTCACAGCATCG
GTCTCACAGACAAATGGCTACTACCACCAATCCACTAATCAGACATGAAAACAGAATGGTGCTGGCTAGCAC
TACGGCAAAGGCCATGGAACAGATGGCTGGATCGAGTGAACAGGCAGCAGAGGCCATGGAGGTTGCTAATCA
GACTAGGCAGATGGTACATGCAATGAGAACTATTGGGACTCATCCTAGCTCCAGTGCTGGTCTGAAAGATGA
CCTTCTTGAAAATTTGCAGGCCTACCAGAAACGAATGGGAGTGCAGATGCAGCGATTCAAGTGATCCTCTCG
TCATCGCAGCAAATATCATTGGGATCTTGCACCTGATATTGTGGATTACAGATCGTCTTTTTTTCAAATGCA
TTTATCGTCGCTTTAGATACGGGTTGAAAAGAGGGCCTTCTACGGAAGGAGTGCCTGAGTCCATGAGGGAAG
AATATCAACAGGAACAGCAGAGTGCGGTGGATGTTGACGATGGTCATTTTGTCAACATAGAGCTAGAGTAA-
-------------------
>A/swine/Nebraska/A02218433/2017/1-982
-------------------------ATGAGTCTTCTAACCGAGGTCGAAACGTACGTTCTTTCTATCATCCC
GTCAGGCTCCCTCAAAGCCGAGATCGCACAGAGACTGGAAAGTGTTTTTTCAGGAAAGAACACAGATCTTGA
GGCTCTCATGGAATGGCTAAAGACAAGACCAATCTTGTCACCTCTGACTAAGGGGATTTTAGGATTTGTGTT
CACGCTCACCGTGCCCAGTGAGCGAGGACTGCAGCGTAGACGCTTTGTTCAAAATGCCCTAAATGGGAATGG
GGACCCGAACAACATGGATAGGGCAGTTAAACTATACAAGAAGCTCAAAAGAGAAATAACGTTCCATGGGGC
CAAGGAGGTGTCACTAAGCTATTCAACTGGTGCACTTGCCAGTTGCATGGGCCTCATATACAACAGGATGGG
AACAGTGACCACAGAAGCTGCTTTTGGTCTAGTGTGTGCCACTTGTGAACAGATTGCTGATTCACAGCATCG
GTCTCACAGACAAATGGCTACTACCACCAACCCACTAATCAGGCATGAAAACAGAATGGTGCTGGCTAGCAC
TACGGCAAAGGCTATGGAACAGATGGCTGGATCGAGTGAACAGGCAGCAGAGGCCATTGAGGTTGCTAATCA
AACTAGGCAGATGGTGCATGCAATGAGAACTATTGGGACTCATCCTAGCTCCAGCGCTGGTCTGAAAGATGA
CCTTCTTGAAAATTTACAGGCCTACCAGAAGCGAATGGGAGTGCAGATGCAGCGATTCAAATGATCCTCTCG
TCATTGCAGCAAATATCATTGGGATCTTGCACCTGATATTGTGGATTACTGATCGTCTTTTTTTCAAATGTC
TTTATCGTCGCTTTAAATACGGTTTGAAAAGAGGGCCTTCTACGGAAGGAGTGCCTGAGTCCATGAGGGAAG
AATACCAACAAGAACAGCAGAGTGCTGTGGATGTTGACGATGGTCATTTTGTCAACATAGAGCTAGAGTAA-
-------------------
>A/swine/North_Carolina/A01785281/2017/1-982
-------------------------ATGAGTCTTCTAACCGAGGTCGAAACGTACGTTCTATCTATCATACC
GTCAGGCCCCCTCAAAGCCGAGATCGCGCAGAGACTGGAAAGTGTCTTTGCAGGAAAGAACACAGATCTTGA
AGCTCTCATGGAATGGCTAAAGACAAGACCAATCTTGTCACCTCTGACTAAGGGAATTTTAGGATTTGTGTT
CACGCTCACCGTGCCCAGTGAGCGAGGACTGCAGCGTAGACGCTTTGTCCAAAATGCCCTGAATGGGAACGG
GGACCCAAACAACATGGATAGAGCAGTTAAACTATACAAGAAGCTCAAAAGAGAAATAACATTCCATGGGGC
CAAGGAGGTGTCACTAAGCTATTCAACTGGTGCACTTGCCAGTTGCATGGGCCTCATATACAACAGGATGGG
AACAGTGACCACAGAAGCTGCTTTTGGTCTAGTGTGTGCCACTTGTGAACAGATTGCTGATTCACAGCATCG
GTCTCACAGACAGATGGCTACAACCACCAATCCACTAATCAGGCATGAGAACAGAATGGTGCTGGCTAGCAC
TACGGCAAAGGCTATGGAACAGATGGCTGGATCGAGTGAACAGGCAGCGGAGGCCATGGAGGTTGCTAATCA
GACTAGGCAGATGGTACATGCAATGAGAACTATTGGGACTCACCCTAGCTCCAGTACTGGTCTGAAAGATGA
CCTTCTTGAAAATTTGCAGGCCTACCAGAAGCGAATGGGAGTGCAGATGCAGCGATTCAAGTGATCCTCTCG
CCATTGCAGCAAATATCATTGGGATCTTGCACCTGATATTGTGGATTACTGATCGTCTTTTCTTCAAATGTA
TTTATCGTCGCTTTAAATACGGTTTGAAAAGAGGGCCTTCAACGGAAGGAGTGCCTGAGTCCATGAGGGAAG
AATATCAACAGGAACAGCAGAGTGCTGTGGATGTTGACGATGGTCATTTTGTCAACATAGAGCTAGAGTAA-
-------------------
>A/swine/Pennsylvania/A02218034/2017/1-982
-------------------------ATGAGTCTTCTAACCGAGGTCGAAACGTACGTTCTTTCTATCATACC
GTCAGGCCCCCTCAAAGCCGAGATTGCGCAGAGACTGGAAAGTGTCTTTGCAGGAAAGAACACAGATCTTGA
GGCTCTCATGGAATGGCTAAAGACAAGACCAATCTTGTCACCTCTGACTAAGGGAATTTTAGGATTTGTGTT
CACGCTCACCGTGCCCAGTGAGCGAGGACTGCAGCGTAGACGCTTTGTCCAAAATGCCCTGAATGGGAATGG
GGACCCAAACAACATGGATAGAGCAGTTAAACTATACAAGAAGCTCAAAAGAGAAATAACGTTCCATGGGGC
CAAGGAGGTGTCACTAAGCTATTCAACTGGTGCACTTGCCAGTTGCATGGGCCTCATATACAACAGGATGGG
AACAGTGACCACAGAAGCTGCTTTTGGTCTAGTGTGTGCCATTTGTGAACAGATTGCTGATTCACAGCATCG
GTCTCACAGACAGATGGCTACAACCACCAATCCACTAATCAGGCATGAGAACAGAATGGTGCTGGCTAGCAC
TACGGCAAAGGCTATGGAACAGATGGCTGGATCGAGTGAACAGGCAGCGGAGGCCATGGAGGTTGCTAATCA
GACTAGGCAAATGGTACATGCAATGAGAACTATTGGGACTCATCCTAGCTCCAGTACTGGTCTGAAAGATGA
CCTTCTTGAAAATTTGCAGGCCTACCAGAAGCGAATGGGAGTGCAGATGCAGCGATTCAAGTGATCCTCTCT
CCATTGCAGCAAATATCATTGGGATCTTGCACCTGATATTGTGGATTACTGATCGTCTTTTTTTCAAATGTA
TTTATCGTCGCTTTAAATACGGTTTGAAAAGAGGGCCTTCTACGGAAGGAGTGCCTGAGTCTATGAGGGAAG
AATATCAACAGGAACAGCAGAGTGCTGTGGATGTTGACGATGGTCATTTTGTCAACATAGAGCTAGAGTAA-
-------------------
>A/swine/Nebraska/A02218434/2017/1-982
-------------------------ATGAGTCTTCTAACCGAGGTCGAAACGTACGTTCTTTCTATCATCCC
GTCAGGCCCCCTCAAAGCCGAGATCGCGCAGAGACTGGAAAGTGTCTTTGCAGGAAAGAACACAGATCTTGA
GGCTCTCATGGAATGGCTAAAGACAAGACCAATCTTGTCACCTTTGACTAAGGGTATTTTAGGATTTGTGTT
CACGCTCACCGTGCCCAGTGAGCGAGGACTGCAGCGTAGACGCTTTGTCCAAAATGCCCTAAATGGGAATGG
GGACCCAAACAACATGGATAGAGCAGTTAAACTATACAAGAAGCTCAAAAGAGAAATAACGTTCCATGGGGC
CAAGGAGGTGTCACTAAGCTATTCAACTGGTGCACTTGCCAGTTGCATGGGCCTTATATACAACAGGATGGG
AACAGTAACCACAGAAGCTGCTTTTGGTCTAGTATGTGCCACTTGTGAACAGATCGCTGATTCACAGCATCG
GTCTCACAGACAAATGGCTACTACCACCAATCCACTAATCAGGCATGAAAACAGAATGGTGCTGGCTAGCAC
TACGGCGAAGGCTATGGAACAGATGGCTGGATCGAGTGAACAGGCAGCAGAGGCCATGGAGGTTGCTAATCA
GACTAGGCAAATGGTACATGCAATGAGAACTATTGGTACTCATCCTAGCTCCAGTGCTGGTCTGAAAGATGA
CCTTCTTGAAAATTTGCAGGCCTACCAGAAACGAATGGGAGTGCAGATCCAGCGATTCAAGTGATCCTCTCG
TCATTGCAGCAAATATCATTGGAATCTTGCACCTGATATTGTGGATTACAGATCGTCTTTTTTTCAAATGCA
TTTATCGTCGCTTTAAATACGGGTTGAAAAGAGGGCCTTCTACGGAAGGAGTGCCTGAGTCCATGAGGGAAG
AATACCAACAGGAACAGCGGAGTGCTGTGGATGTTGACGATGGTCATTTTGTCAACATAGAGCTAGAGTAA-
-------------------
>A/swine/Missouri/A02218334/2017/1-982
-------------------------ATGAGTCTTCTAACCGAGGTCGAAACGTACGTTCTTTCTATCATACC
GTCAGGCCCCCTCAAAGCCGAGATCGCGCAGAGACTGGAAAGTGTCTTTGCAGGAAAAAACACAGATCTTGA
AGCTCTCATGGAATGGCTAAAGACAAGACCAATCTTGTCACCTCTGACTAAGGGAATTTTAGGATTTGTGTT
CACGCTCACCGTGCCCAGTGAGCGAGGACTGCAGCGTAGACGCTTTGTCCAAAATGCCCTGAATGGGAATGG
GGACCCAAACAACATGGATAGAGCAGTTAAACTATACAAGAAGCTCAAAAGAGAAATAACATTCCATGGGGC
CAAGGAGGTGTCACTAAGCTATTCAACTGGTGCACTTGCCAGTTGCATGGGCCTCATATACAACAGGATGGG
AACAGTGACCACAGAAGCTGCTTTTGGTCTAGTGTGTGCCACTTGTGAACAGATTGCTGATTCACAGCATCG
GTCTCACAGACAGATGGCTACAACCACCAATCCACTAATCAGGCATGAGAACAGAATGGTGCTGGCTAGCAC
TACGGCAAAGGCTATGGAACAGATGGCTGGATCGAGTGAACAGGCAGCGGAGGCCATGGAGGTTGCTAATCA
GACTAGGCAGATGGTACATGCAATGAGAACTATTGGGACTCATCCTAGCTCCAGTACTGGTCTGAAAGATGA
CCTTCTTGAAAATTTGCAGGCCTACCAGAAGCGAATGGGAGTGCAGATGCAGCGATTCAAGTGATCCTCTCG
CCATTGCAGCAAATATCATTGGGATCTTGCACCTGATATTGTGGATTGCTGATCGTCTTTTTTTCAAATGTA
TTTATCGTCGCTTTAAATACGGTTTGAAAAGAGGGCCTTCAACGGAAGGAGTGCCTGAGTCCATGAGGGAAG
AATACCAACAGGAACAGCAGAGTGCTGTGGATGTTGACGATGGTCATTTTGTCAACATAGAGCTAGAGTAA-
-------------------
>A/swine/Missouri/A02218506/2017/1-982
-------------------------ATGAGTCTTCTAACCGAGGTCGAAACGTACGTTCTTTCTATCATACC
GTCAGGCCCCCTCAAAGCCGAGATTGCGCAGAGACTGGAAAGTGTCTTTGCAGGAAAGAATACAGACCTTGA
GGCTCTCATGGAATGGCTAAAGACAAGACCAATCTTGTCACCTTTGACTAAGGGAATTTTAGGATTTGTGTT
CACGCTCACCGTGCCCAGTGAGCGAGGACTGCAGCGTAGACGCTTTGTCCAAAATGCCTTGAATGGGAATGG
GGACCCAAACAACATGGATAGGGCAGTTAAACTATACAAGAAGCTCAAAAGAGAAATAACGTTCCATGGGGC
CAAGGAGGTGTCATTAAGCTATTCAACTGGTGCACTTGCTAGTTGCATGGGCCTCATATACAACAGGATGGG
AACAGTGACCACAGAAGCTGCTTTTGGTCTAGTGTGTGCCACTTGTGAACAGATTGCTGATTCACAGCATCG
GTCTCACAGACAGATGGCTACAACCACCAATCCACTAATCAGGCATGAAAACAGAATGGTGCTGGCTAGCAC
TACGGCAAAGGCTATGGAACAGATGGCTGGATCGAGTGAACAGGCAGCGGAAGCCATGGAGGTTGCTAATCA
GACTAGGCAGATGGTACATGCAATGAGAGCTATTGGGACTCATCCTAGTTCCAGTACTGGTCTGAAAGATGA
CCTTCTTGAAAATTTGCAGGCCTATCAGAAGCGAATGGGAGTGCAGATGCAGCGGTTTAAGTGATCCTATCG
CCATTGCAGCAAATATCATTGGGATCTTGCACCTGATATTGTGGATTACTGATCGTCTTTTTTTCAAATGTA
TTTATCGTCGCTTTAAATACGGTTTGAAAAGAGGGCCTTCTACGGAAGGAGTGCCTGAGTCCATGAGGGAAG
AATATCAACAGGAACAGCAGAGTGCTGTGGATGTTGACGATGGTCATTTTGTCAACATAGAGCTGGAGTAA-
-------------------
>A/swine/Iowa/A02217289/2017/1-982
-------------------------ATGAGTCTTCTAACCGAGGTCGAAACGTACGTTCTTTCTGTCATACC
GTCAGGCCCCCTCAAAGCCGAGATTGCGCAGAGACTGGAAAGTGTCTTTGCAGGAAAGAATACAGACCTTGA
GGCTCTCATGGAATGGCTAAAGACAAGACCAATCTTGTCACCTCTGACTAAGGGAATTTTAGGATTTGTGTT
CACGCTCACCGTGCCCAGTGAGCGAGGACTGCAGCGTAGACGCTTTGTCCAAAATGCCCTGAATGGGAATGG
GGACCCAAACAACATGGATAGAGCAGTTAAACTATACAAGAAGCTCAAAAGAGAAATAACGTTCCATGGGGC
CAAGGAGGTGTCACTAAGCTATTCAACTGGTGCACTTGCCAGTTGCATGGGCCTCATATACAACAGGATGGG
AACAGTGACCACAGAAGCTGCTTTTGGTCTAGTGTGTGCCACTTGTGAACAGATTGCTGATTCACAGCATCG
GTCTCACAGACAGATGGCTACAACCACCAATCCACTAATCAGGCATGAGAACAGAATGGTGCTGGCTAGCAC
TACGGCAAAGGCTATGGAACAGATGGCTGGATCGAGTGAACAGGCAGCGGAGGCCATGGAGGTTGCCAATCA
GACTAGGCAGATGGTACATGCAATGAGAACTATTGGGACTCATCCTAGCTCCAGTACTGGTCTGAAAGATGA
CCTTCTTGAAAATTTGCAGGCCTACCAGAAGCGAATGGGAGTGCAGATGCAGCGATTCAAGTGATCTTCTCG
CCATTGCAGCAAATATCATTGGGATCTTGCACTTGATATTGTGGATTACTGATCGTCTTTTTTTCAAATGTA
TTTATCGTCGCTTTAAATACGGTTTGAAAAGAGGGCCTTCTACGGAAGGAGTGCCTGAGTCCATGAGGGAAG
AATATCAACAGGAACAGCAGAGTGCTGTGGATGTTGACGATGGTCATTTTGTCAACATAGAGCTAGAGTAA-
-------------------
>A/swine/Indiana/A02218180/2017/1-982
-------------------------ATGAGTCTTCTAACCGAGGTCGAAACGTACGTTCTTTCTATCATCCC
GTCAGGCCCCCTCAAAGCCGAGATCGCGCAGAGACTGGAAAGTGTATTTGCAGGAAAGAACACAGATCTTGA
GGCTCTCATGGAATGGCTAAAGACAAGACCAATCTTGTCACCTCTGACTAAGGGAATTTTAGGATTTGTGTT
CACGCTCACCGTGCCCAGTGAGCGAGGACTGCAGCGTAGACGCTTTGTCCAAAATGCCCTAAATGGGAATGG
GGACCCGAACAACATGGATAGAGCAGTTAAACTATACAAGAAGCTCAAAAGAGAAATAACGTTCCATGGGGC
TAAAGAGGTGTCACTAAGCTATTCAACTGGTGCACTTGCCAGTTGCCTGGGCCTCATATACAACAGGATGGG
AACAGTGACCACAGAAGCTGCTTTTGGTCTAGTGTGTGCCACTTGTGAACAGATTGCTGATTCACAGCATCG
ATCTCACAGACAAATGGTCGCTACCACCAATCCACTAATCAGGCATGAAAACAGAATGGTGCTGGCTAGCAC
TACTGCAAAGGCTATGGAACAGATGGCTGGATCGAGTGAACAGGCAGCAGAGGCCATGGAGGTTGCTAATCA
GACTAGGCAGATGGTACATGCAATGAGGACTATTGGGACTCATCCTAGCTCCAGTGCTGGTCTGAAGGATGA
CCTTCTTGAAAATTTACAGGCCTACCAGAAGCGAATGGGAGTGCAAATGCAGCGATTCAAGTGATCCTCTCG
TCATTGCAGCAAATATCATTGGGATCTTGCACCTGATATTGTGGATTACTGATCGTCTTTTTTTCAAATGTA
TTTATCGTCGCTTTAAATACGGTTTGAAAAGAGGGCCTCCTACAGAAGGAGTGCCTGAGTCCATGAGGGAAG
AATATCAACAGGAACAGCAGAGTGCTGTAGATGTTGACGATGGTCATTTTGTCAACATAGAGCTAGAGTAA-
-------------------
>A/swine/Iowa/A01104104/2017/1-982
-------------------------ATGAGTCTTCTAACCGAGGTCGAAACGTACGTTCTTTCTATCATCCC
GTCAGGCCCCCTCAAAGCCGAGATCGCGCAGAGACTGGAGAGTGTCTTTGCAGGAAAGAACACAGATCTTGA
AGCTCTCATGGAATGGCTAAAGACAAGACCAATCTTGTCACCTTTGACTAAGGGAATTTTAGGATTTGTGTT
CACGCTCACCGTGCCCAGTGAGCGAGGACTGCAGCGTAGACGCTTTGTCCAAAATGCCCTAAATGGGAATGG
GGACCCAAACAACATGGATAGAGCAGTCAAACTATACAAGAAGCTCAAAAGAGAAATAACGTTCCATGGGGC
CAAAGAGGTGTCACTAAGCTATTCAACTGGTGCACTTGCCAGTTGCATGGGCCTCATATATAACAGGATGGG
GACAGTAACCACAGAAGCTGCTTTTGGTCTAGTATGTGCCACCTGTGAACAGATTGCTGATTCACAGCATCG
GTCTCACAGACAAATGGCTACCACCACCAATCCACTAATCAGGCATGAAAACAGAATGGTGCTGGCTAGCAC
TACGGCAAAGGCTATGGAACAGATGGCTGGATCGAGTGAACAGGCAGCAGAGGCCATGGAGGTTGCTAATCA
GACTAGGCAGATGGTACATGCAATGAGGACTATTGGGACTCATCCTAGCTCCAGTGCTGGTCTGAAAGATGA
CCTTCTTGAAAACTTGCAGGCCTACCAGAAACGAATGGGAGTGCAGATGCAGCGATTCAAGTGATCCTCTCG
TCATTGCAGCAAATATCATTGGGATCTTGCACCTGATATTGTGGATTACAGATCGTCTTTTTTTCAAATGCA
TTTATCGTCGCTTTAAATACGGGTTGAAAAGAGGGCCTTCTACGGAAGGAGTGCCTGAGTCCATGAGGGAAG
AATATCAACAGGAACAGCAGAGTGCGGTGGATGTTGACGATGGTCATTTTGTCAACATAGAGCTAGAGTAA-
-------------------
>A/swine/Illinois/A02218178/2017/1-982
-------------------------ATGAGTCTTCTAACCGAGGTCGAAACGTACGTTCTTTCTATCATCCC
GTCAGGCCCCCTCAAAGCCGAGATCGCGCAGAGACTGGAAAGTGTATTTGCAGGAAAGAACACAGATCTTGA
GGCTCTCATGGAATGGCTAAAGACAAGACCAATCTTGTCACCTCTGACTAAGGGAATTTTAGGATTTGTGTT
CACGCTCACCGTGCCCAGTGAGCGAGGACTGCAGCGTAGACGCTTTGTCCAAAATGCCCTAAATGGGAATGG
GGACCCGAACAACATGGATAGAGCAGTTAAACTATACAAGAAGCTCAAAAGAGAAATAACGTTCCATGGGGC
TAAGGAGGTGTCACTAAGCTATTCAACTGGTGCACTTGCCAGTTGCATGGGCCTCATATACAACAGGATGGG
AACAGTGACCACAGAAGCTGCTTTTGGTCTAGTGTGTGCCACCTGTGAACAGATTGCTGATTCACAGCATCG
ATCTCACAGACAAATGATTACTACCACCAATCCACTAATCAGGCATGAAAACAGAATGGTGCTGGCTAGCAC
TACTGCAAAGGCTATGGAACAGATGGCTGGATCGAGTGAACAGGCAGCAGAGGCCATGGAGGTTGCTAATCA
GACTAGGCAGATGGTACATGCAATGAGAACTATTGGGACTCATCCTAGCTCCAGTGCTGGTCTGAAGGATGA
CCTTCTTGAAAATTTACAGGCCTACCAGAAGCGAATGGGAGTGCAAATGCAGCGATTCAAGTGATCCTCTCG
TCATTGCAGCAAATATCATTGGGATCTTGCACCTGATATTGTGGATTACTGATCGTCTTTTTTTCAAATGTA
TTTATCGTCGCTTTAAATACGGTTTGAAAAGAGGGCCTCCTACAGAAGGAGTGCCTGAGTCCATGAGGGAAG
AATATCAACAGGAACAGCAGAGTGCTGTGGATGTTGACGATGGTCATTTTGTCAACATAGAGCTAGAGTAA-
-------------------
>A/swine/Iowa/A02217313/2017/1-982
-------------------------ATGAGTCTTCTAACCGAGGTCGAAACGTACGTTCTTTCTATCATCCC
ATCAGGCCCCCTCAAAGCCGAGATCGCGCAGAGACTGGAAAGTGTATTTGCAGGAAAGAACACAGATCTTGA
GGCTCTCATGGAATGGCTAAAGACAAGACCAATCTTGTCACCTCTGACTAAGGGAATTTTAGGATTTGTGTT
CACGCTCACCGTGCCCAGTGAGCGAGGACTGCAGCGTAGACGCTTTGTCCAAAATGCCCTAAATGGGAATGG
GGACCCGAACAACATGGATAGAGCAGTTAAACTATACAAGAAGCTCAAAAGAGAAATAACGTTCCATGGGGC
TAAGGAGGTGTCACTAAGCTATTCAACTGGTGCACTTGCCAGTTGCATGGGCCTCATATACAACAGGATGGG
AACAGTGACCACAGAAGCTGCTTTTGGTCTAGTGTGTGCCACTAGTGAACAGATTGCTGATTCACAGCATCG
ATCTCACAGACAAATGGTTGCTACCACCAATCCACTAATCAGGCATGAAAATAGAATGGTGCTGGCTAGCAC
TACTGCAAAGGCTATGGAACAGATGGCTGGATCGAGTGAACAGGCAGCAGAGGCCATGGAGGTTGCTAATCA
GACTAGGCAGATGGTACATGCAATGAGAACTATTGGGACTCATCCTAGCTCCAGTGCTGGTCTGAAGGATGA
CCTTCTTGAAAATTTACAGGCCTACCAGAAGCGAATGGGAGTGCAAATGCAGCGATTCAAGTGATCCTCTCG
TCATTGCAGCAAATATCATTGGGATCTTGCACCTGATATTGTGGATTACTGATCGTCTTTTTTTCAAATGTA
TTTATCGTCGCTTTAAATACGGTTTGAAAAGAGGGCCTCCTACAGAAGGAGTGCCTGAGTCCATGAGGGAAG
AATATCAACAGGAACAGCAGAGTGCTGTGGATGTTGACGATGGTCATTTTGTCAACATAGAGCTAGAGTAA-
-------------------
>A/swine/Indiana/A02216462/2017/1-982
-------------------------ATGAGTCTTCTAACCGAGGTCGAAACGTACGTTCTTTCTATCATCCC
GTCAGGCTCCCTCAAAGCCGAGATCGCGCAGAGACTGGAAAGTGTTTTTTCAGGAAAGAACACAGATCTTGA
GGCTCTCATGGAATGGCTAAAGACAAGACCAATCTTGTCACCTCTGACTAAGGGGATTTTAGGATTTGTGTT
CACGCTCACCGTGCCCAGTGAGCGAGGACTGCAGCGTAGACGCTTTGTCCAAAATGCCCTAAATGGGAATGG
GGACCCGAACAACATGGATAGAGCAGTTAAACTATACAAGAAGCTCAAAAGAGAAATAACGTTCCATGGGGC
CAAGGAGGTGTCACTAAGCTATTCAACTGGTGCACTTGCCAGTTGCATGGGCCTCATATACAACAGGATGGG
AACAGTGACCACAGAAGCTGCCTTTGGTCTGGTGTGTGCCACTTGTGAACAGATTGCTGATTCACAGCATCG
GTCTCACAGACAAATGGCTACTACCACCAATCCACTAATCAGACATGAAAACAGAATGGTGCTGGCTAGCAC
TACGGCAAAGGCTATGGAACAAATGGCTGGATCGAGTGAACAGGCAGCAGAGGCCATGGAGGTTGCTAATCA
AACTAGGCAGATGGTACATGCAATGAGAACTATTGGGACTCATCCTAGCTCCAGTGCTGGTCTGAAAGATGA
CCTTCTTGAAAATTTGCAGGCCTACCAGAAGCGAATGGGAGTGCAGATGCAGCGATTCAAGTGACCCTCTCG
TCATCGCAGCAAATATCATTGGGATCTTGCACCTGATATTGTGGATTACTGATCGTCTTTTTTTCAAATGTA
TTTATCGTCGCTTTAAATACGGTTTGAAAAGAGGGCCTTCTACGGAAGGAGTGCCTGAGTCCATGAGGGAAG
AATATCAACAGGAACAGCAGAGTGCTGTGGATGTTGACGATGGTCATTTTGTCAACATAGAGCTAGAGTAA-
-------------------
>A/swine/Indiana/A02217290/2017/1-982
-------------------------ATGAGTCTTCTAACCGAGGTCGAAACGTACGTTCTTTCTATCATACC
GTCAGGCCCCCTCAAAGCCGAGATTGCGCAGAGACTGGAAAGTGTCTTTGCAGGAAAGAATACAGACCTTGA
GGCTCTCATGGAATGGCTAAAGACAAGACCAATCTTGTCACCTTTGACTAAGGGAATTTTAGGATTTGTGTT
CACGCTCACCGTGCCCAGTGAGCGAGGACTGCAGCGTAGACGCTTTGTCCAAAATGCCCTGAATGGAAATGG
GGACCCAAACAACATGGATAGAGCAGTTAAACTATACAAGAAGCTCAAAAGAGAAATAACGTTCCATGGGGC
CAAGGAGGTGTCACTAAGCTATTCAACTGGTGCACTTGCCAGTTGCATGGGCCTCATATACAACAGGATGGG
AACAGTGACCACAGAAGCTGCTTTTGGTCTAGTGTGTGCCACTTGTGAACAGATTGCTGATTCACAGCATCG
GTCTCACAGACAGATGGCTACAACCACCAATCCACTAATCAGGCATGAGAACAGAATGGTGCTGGCTAGCAC
TACGGCAAAGGCTATGGAACAGATGGCTGGATCGAGTGAACAGGCAGCGGAGGCCATGGAGGTTGCTAATCA
GACTAGGCAGATGGTACATGCAATGAGAACTATTGGGACTCATCCTAGTTCCAGTACTGGTCTGAAAGATGA
CCTTCTTGAAAATTTGCAGGCCTATCAGAAGCGAATGGGAGTGCAGATGCAGCGGTTTAAATGATCCTCTCG
CCATTGCAGCAAATATCATTGGGATCTTGCACCTGATATTGTGGATTACTGATCGTCTTTTTTTCAAATGTA
TTTATCGTCGCTTTAAATACGGTTTGAAAAGAGGGCCTTCTACGGAAGGAGTGCCTGAGTCCATGAGGGAAG
AATATCAACAGGAACAGCAGAGTGCTGTGGATGTTGACGATGGTCATTTTGTCAACATAGAGCTGGAGTAA-
-------------------
>A/swine/Nebraska/A02216645/2017/1-982
-------------------------ATGAGTCTTCTAACCGAGGTCGAAACGTACGTTCTTTCTATCATCCC
GTCAGGCCCCCTCAAAGCCGAGATCGCGCAGAGACTGGAGAGTGTCTTTGCAGGAAAGAACACAGATCTTGA
AGCTCTCATGGAATGGCTAAAGACAAGACCAATCTTGTCACCTTTGACTAAGGGAATTTTAGGATTTGTGTT
CACGCTCACCGTGCCCAGTGAGCGAGGACTGCAGCGTAGACGCTTTGTCCAAAATGCCCTAAATGGGAATGG
GGACCCAAACAACATGGATAGAGCAGTCAAACTATACAAGAAGCTCAAAAGAGAAATAACGTTCCATGGGGC
CAAGGAGGTCTCACTAAGCTATTCAACTGGTGCACTTGCCAGTTGCATGGGCCTCATATATAACAGGATGGG
GACAGTAACCACAGAAGCTGCTTTTGGTCTAGTATGTGCCACCTGTGAACAGATTGCTGATTCACAGCATCG
GTCTCACAGACAAATGGCTACCACCACCAATCCACTAATCAGGCATGAAAACAGAATGGTGCTGGCTAGCAC
TACGGCAAAGGCTATGGAACAGATGGCTGGATCGAGTGAACAGGCAGCAGAGGCCATGGAGGTTGCTAATCA
GACTAGGCAGATGGTACATGCAATGAGGACTATTGGGACTCATCCTAGCTCCAGTGCTGGTCTGAAAGATGA
CCTTCTTGAAAACTTGCAGGCCTACCAGAAACGAATGGGAGTGCAGATGCAGCGATTCAAGTGATCCTCTCG
TCATTGCAGCAAATATCATTGGGATCTTGCACCTGATATTGTGGATTACAGATCGTCTTTTTTTCAAATGCA
TTTATCGTCGCTTTAAATACGGGTTGAAAAGAGGGCCTTCTACGGAAGGAGTGCCTGAGTCCATGAGGGAAG
AATATCAACAGGAACAGCAGAGTGCGGTGGATGTTGACGATGGTCATTTTGTCAACATAGAGCTAGAGTAA-
-------------------
>A/swine/Nebraska/A02216637/2017/1-982
-------------------------ATGAGTCTTCTAACCGAGGTCGAAACGTACGTTCTTTCTATCATACC
GTCAGGCCCCCTCAAAGCCGAGATCGCACAGAGACTGGAAAGTGTTTTTGCAGGAAAGAACACAGATCTTGA
GGCTCTCATGGAATGGCTAAAGACAAGACCAATCTTGTCACCTCTGACTAAGGGAATTTTAGGGTTTGTGTT
CACGCTCACCGTGCCCAGTGAGCGAGGACTGCAGCGTAGACGCTTTGTCCAAAATGCCCTGAATGGGAATGG
GGACCCAAACAACATGGATAGAGCAGTTAAACTATACAAGAAGCTCAAAAGAGAAATAACGTTCCACGGGGC
CAAAGAGGTGTCACTAAGCTATTCAACTGGTGCACTTGCCAGTTGCATGGGCCTCATATACAACAGGATGGG
AACTGTGACTACAGAAGCTGCTTTTGGTCTAGTGTGTGCCACTTGTGAACAGATTGCTGATTCACAGCATCG
GTCTCACAGACAGATGGCTACAACCACCAATCCACTAATCAGGCATGAGAACAGAATGGTGCTGGCTAGCAC
CACGGCAAAGGCTATGGAACAGATGGCTGGATCGAGTGAACAGGCAGCGGAGGCCATGGAGGTTGCTAATCA
GACTAGGCAGATGGTACATGCAATGAGAACTATTGGGACTCACCCTAGCTCCAGTACAGGTCTGAAAGATGA
CCTTCTTGAAAATTTGCAGGCCTACCAGAAGCGAATGGGAGTGCAGATGCAGCGATTCAAGTGATCCTCTCG
CCATTGCAGCAAATATCATTGGGATCTTGCACCTGATATTGTGGATTGCTGATCGTCTTTTTTTCAAATGTA
TTTATCGTCGCTTTAAATACGGTTTGAAAAGAGGGCCTTCTACGGAAGGAGTGCCTGAGTCCATGAGGGAAG
AATATCAGCAGGAACAGCAGAGTGCTGTGGATGTTGACGATGGTCATTTTGTCAACATAGAGCTAGAGTAA-
-------------------
>A/swine/Ohio/A02216472/2017/1-982
-------------------------ATGAGTCTTCTAACCGAGGTCGAAACGTACGTTCTTTCTATCATCCC
GTCAGGCCCCCTCAAAGCCGAGATCGCGCAGAGACTGGAAAGTGTATTTGCAGGAAAGAACACAGATCTTGA
GGCTCTCATGGAATGGCTAAAGACAAGACCAATCTTGTCACCTCTGACTAAGGGAATTTTAGGATTTGTGTT
CACGCTCACCGTGCCCAGTGAGCGAGGACTGCAGCGTAGACGCTTTGTCCAAAATGCCCTGAATGGGAATGG
GGACCCGAACAACATGGATAGAGCAGTTAAACTATACAAGAAGCTCAAAAGAGAAATAACGTTCCATGGGGC
TAAGGAGGTGTCACTAAGCTATTCAACTGGTGCACTTGCCAGTTGCATGGGCCTCATATACAACAGGATGGG
AACAGTGACCACAGAAACTGCTTTTGGTCTAGTGTGTGCCACTTGTGAACAGATTGCTGATTCACAGCATCG
ATCTCACAGACAAATGGTTACTACCACCAATCCACTAATCAGGCATGAAAACAGAATGGTGCTGGCTAGCAC
TACTGCAAAGGCTATGGAACAGATGGCTGGATCGAGTGAACAGGCAGCAGAGGCCATGGAGGTTGCTAATCA
GACTAGGCAGATGGTACATGCAATGAGGACTATTGGGACTCATCCTAGCTCCAGTGCTGGTCTGAAGGATGA
CCTTCTTGAAAATTTACAGGCCTACCAGAAGCGAATGGGAGTGCAAATGCAGCGATTCAAGTGATCCTCTCG
TCATTGCAGCAAATATCATTGGGATCTTGCACCTGATATTGTGGATTACTGATCGTCTTTTTTTCAAATGTA
TTTATCGTCGCTTTAAATACGGTTTGAAAAGAGGGCCTCCTACAGAAGGAGTGCCTGAGTCCATGAGGGAAG
AATATCAACAGGAACAGCAGAGTGCTGTAGATGTTGACGATGGTCATTTTGTCAACATAGAGCTAGAGTAA-
-------------------
>A/swine/Iowa/A02217282/2017/1-982
-------------------------ATGAGTCTTCTAACCGAGGTCGAAACGTACGTTCTTTCTATCATCCC
GTCAGGCCCCCTCAAAGCCGAGATCGCGCAGAGACTGGAAAGTGTCTTTGCAGGAAAGAACACAGATCTTGA
GGCTCTCATGGAATGGCTAAAGACAAGACCAATCTTGTCACCTCTGACTAAGGGAATTTTAGGATTTGTGTT
CACGCTCACCGTGCCCAGTGAGCGAGGACTGCAGCGTAGACGCTTTGTCCAAAATGCCCTAAATGGGAATGG
GGACCCCAACAACATGGATAGAGCAGTTAAACTATACAAGAAGCTCAAAAGAGAAATAACGTTCCATGGGGC
TAAGGAGGTGTCACTAAGCTATTCAACTGGTGCACTTGCCAGTTGCATGGGCCTCATATACAACAGGATGGG
AACAGTGACCACAGAAGCTGCTTTTGGTCTAGTGTGTGCCACCTGTGAACAGATTGCTGATTCACAGCATCG
GTCTCACAGACAAATGGCTACAACCACCAATCCACTAATCAGGCATGAAAATAGAATGGTGCTGGCTAGCAC
TACTGCAAAGGCTATGGAACAGATGGCTGGATCGAGTGAACAGGCAGCAGAGGCCATGGAGGTTGCTAATCA
GACTAGGCAGATGGTACATGCAATGAGAACTATTGGGACTCATCCTAGCTCCAGTGCTGGTCTGAAAGATGA
CCTTCTTGAAAATTTACAGGCCTATCAGAAGCGAATGGGAGTGCAAATGCAGCGATTCAAGTGATCCTCTCG
TCATTGCAGCAAATATCATTGGGATCTTGCACTTGATATTGTGGATTACTGATCGTCTTTTTTTCAAATATA
TTTACCGTCGCTTTAAATACGGTTTGAAAAGAGGGCCTTCTACAGAAGGAGTGCCTGAGTCCATGAGGGAAG
AATATCAACAGGAACAGCAGAGTGCTGTGGATGTTGACGATGGTCATTTTGTCAACATAGAGCTAGAGTAA-
-------------------
>A/swine/Iowa/A02218163/2017/1-982
-------------------------ATGAGTCTTCTAACCGAGGTCGAAACGTACGTTCTTTCTATCATACC
GTCAGGCCCCCTCAAAGCCGAGATTGCGCAGAGACTGGAAAGTGTCTTTGCAGGAAAGAATACAGACCTTGA
GGCTCTCATGGAATGGCTAAAGACAAGACCAATCTTGTCACCTTTGACTAAGGGAATTTTAGGATTTGTGTT
CACGCTCACCGTGCCCAGTGAGCGAGGACTGCAGCGTAGACGCTTTGTCCAAAATGCCCTGAATGGGAATGG
GGACCCAAACAACATGGATAGAGCAGTTAAACTATACAAGAAGCTCAAAAGAGAAATAACGTTCCATGGGGC
CAAGGAGGTGTCACTAAGCTATTCAACTGGTGCACTTGCCAGTTGCATGGGCCTCATATACAACAGGATGGG
AACAGTGACCACTGAAGCTGCTTTTGGTCTAGTGTGTGCCACTTGTGAACAGATTGCTGATTCACAGCATCG
GTCTCACAGACAGATGGCTACAACCACCAATCCACTAATCAGGCATGAGAACAGAATGGTGCTGGCTAGCAC
TACGGCAAAGGCTATGGAACAGATGGCTGGATCAAGTGAACAGGCAGCGGAGGCCATGGAGGTTGCTAATCA
GACTAGGCAGATGGTACATGCAATGAGAACTATTGGGACTCATCCTAGTTCCAGTACTGGTCTGAAAGATGA
CCTTCTTGAAAATTTGCAGGCCTATCAGAAACGAATGGGAGTGCAGATGCAGCGGTTTAAGTGATCCACTCG
CCATTGCAGCAAATATCATTGGGATCTTGCACCTGATATTGTGGATTACTGATCGTCTTTTTTTCAAATGTA
TTTATCGTCGCTTTAAATACGGTTTGAAAAGAGGGCCTTCTACGGAAGGGGTGCCTGAGTCCATGAGGGAAG
AATATCAACAGGAACAGCAGAGTGCTGTGGATGTTGACGATGGTCATTTTGTCAACATAGAGCTGGAGTAA-
-------------------
>A/swine/North_Carolina/A02216470/2017/1-982
-------------------------ATGAGTCTTCTAACCGAGGTCGAAACGTACGTTCTTTCTATCATCCC
GTCAGGCTCCCTCAAAGCCGAGATCGCGCAGAGACTGGAAAGTGTTTTTTCAGGAAAGAACACAGATCTTGA
GGCTCTCATGGAATGGCTAAAGACAAGACCAATCTTGTCACCTCTGACTAAGGGGATTTTAGGATTTGTGTT
CACGCTCACCGTGCCCAGTGAGCGAGGACTGCAGCGTAGACGCTTTGTCCAAAATGCCCTAAATGGGAATGG
GGACCCGAACAACATGGATAGAGCAGTTAAACTATACAAGAAGCTCAAAAGAGAAATAACGTTCCATGGGGC
CAAGGAGGTGTCACTAAGCTATTCAACTGGTGCACTTGCCAGTTGCATGGGCCTCATATACAACAGGATGGG
AACAGTGACCACAGAAGCTGCCTTTGGTCTGGTGTGTGCCACTTGTGAACAAATTGCTGATTCACAGCATCG
GTCTCACAGACAAATGGCTACTACCACCAATCCACTAATCAGACATGAAAACAGAATGGTGCTGGCTAGCAC
TACGGCAAAGGCTATGGAACAAATGGCTGGATCGAGTGAACAGGCAGCAGAGGCCATGGAGGTTGCTAGTCA
AACTAGGCAGATGGTACATGCAATGAGAACTATTGGGACTCATCCTAGCTCCAGTGCTGGTCTGAAAGATGA
CCTTCTTGAAAATTTGCAGGCCTACCAGAAGCGAATGGGAGTGCAGATGCAGCGATTCAAGTGACCCTCTCG
TCATCGCAGCAAATATCATTGGGATCTTGCACCTGATATTGTGGATTACTGATCGTCTTTTTTTCAAATGTA
TTTATCGTCGCTTTAAATACGGTTTGAAAAGAGGGCCTTCTACGGAAGGAGTGCCTGAGTCCATGAGGGAAG
AATATCAACAGGAACAGCAGAGTGCTGTGGATGTTGACGATGGTCATTTTGTCAACATAGAGCTAGAGTAA-
-------------------
>A/swine/Minnesota/A01785267/2017/1-982
-------------------------ATGAGTCTTCTGACCGAGGTCGAAACGTACGTTCTTTCTATCATCCC
GTCAGGCCCCCTCAAAGCCGAGATCGCGCAGAGACTGGAAAGTGTCTTTGCAGGAAAGAACACAGATCTTGA
GGCTCTCATGGAATGGCTAAAGACAAGACCAATCTTGTCACCTTTGACCAAGGGCATTTTGGGATTTGTATT
CACGCTCACCGTGCCCAGTGAGCGAGGACTGCAGCGTAGACGCTTTGTCCAAAATGCCCTAAATGGGAATGG
GGACCCAAACAACATGGATAGAGCAGTTAAACTATACAAGAAGCTCAAAAGAGAAATAACGTTCCATGGGGC
CAAGGAGGTGTCACTAAGCTATTCAACTGGTGCACTTGCCAGTTGCATGGGCCTCATATACAACAGGATGGG
AACAGTAACCACAGAAGCTGCTTTTGGTTTAGTATGTGCCACTTGTGAACAGATAGCTGATTCACAGCATCG
GTCTCACAGACAAATGGCTACTACCACCAATCCACTAATCAGACATGAAAACAGAATGGTGCTGGCTAGCAC
TACGGCAAAGGCCATGGAACAGATGGCTGGATCGAGTGAACAGGCAGCAGAGGCCATGGAGGTTGCTAATCA
GACTAGGCAGATGGTACATGCAATGAGAACTATTGGGACTCATCCTAGCTCCAGTGCTGGTCTGAAAGATGA
CCTTCTTGAAAATTTGCAGGCATACCAGAAACGAATGGGAGTGCAGATGCAGCGATTCAAGTGATCCTCTCG
TTATCGCAGCAAATATCATTGGGATCTTGCACCTGATATTGTGGATTACAGATCGTCTTTTTTTCAAATGCA
TTTATCGTCGCTTTAGATACGGGTTGAAAAGAGGGCCTTCTACGGAAGGAGTGCCTGAGTCCATGAGGGAAG
AATATCAACAGGAACAGCAGAGTGCGGTGGATGTTGACGATGGTCATTTTGTCAACATAGAGCTAGAGTAA-
-------------------
>A/swine/Iowa/A02217286/2017/1-982
-------------------------ATGAGTCTTCTAACCGAGGTCGAAACGTACGTTCTTTCTATCATCCC
GTCAGGCCCCCTCAAAGCCGAGATCGCGCAGAGACTGGAAAGTGTCTTTGCAGGAAAGAACACAGATCTTGA
GGCTCTCATGGAATGGTTAAAGACAAGACCAATCTTGTCACCTCTGACTAAGGGAATTTTAGGATTTGTGTT
CACGCTCACCGTGCCCAGTGAGCGAGGACTGCAGCGTAGACGCTTTGTCCAAAATGCCCTAAATGGGAATGG
GGACCCGAACAACATGGATAGAGCAGTTAAATTATACAAGAAGCTCAAAAGAGAAATAACGTTCCATGGGGC
CAAGGAAGTGTCACTAAGCTATTCAACTGGTGCACTTGCCAGTTGCATGGGCCTCATATACAACAGGATGGG
AACAGTGACCACAGAAGCTGCTTTTGGTCTAGTGTGTGCCACTTGTGAACAGATTGCTGATTCACAGCATCG
GTCTCACAGACAAATGGCTACTACCACCAATCCACTAATCAGGCATGAAAACAGAATGGTGCTGGCTAGCAC
TACTGCAAAGGCTATGGAACAGATGGCTGGATCGAGTGAACAGGCAGCAGAGGCCATGGAGGTTGCTAATCA
GACTAGACAGATGGTACATGCAATGAGAACTATTGGGACTCATCCTAGCTCCAGTGCTGGTCTGAAAGATGA
CCTTCTTGAAAATTTACAGGCCTACCAGAAGCGAATGGGAGTGCAGATGCAGCGATTCAAGTGATCTTCTCG
TCATTGCCGCAAACATCATTGGGATCTTGCACCTGATATTGTGGATTACTGATCGTCTTTTTTTCAAATGTA
TTTATCGTCGCTTTAAATACGGTTTGAAAAGAGGGCCTTCTACAGAAGGAGTGCCTGAGTCCATGAGGGAAG
AATATCAACAGGAACAGCAGAGTGCTGTGGATGTTGACGATGGTCATTTTGTCAACATAGAGCTAGAGTAA-
-------------------
>A/swine/Nebraska/A02217400/2017/1-982
-------------------------ATGAGTCTTCTAACCGAGGTCGAAACGTACGTTCTTTCTATCATACC
GTCAGGCCCCCTCAAAGCCGAGATCGCGCAGAGACTGGAAAGTGTCTTTGCAGGAAAGAACACAGATCTTGA
GGCTCTCATGGAATGGCTAAAGACAAGACCAATCTTGTCACCTCTGACTAAGGGGATTTTAGGATTTGTGTT
CACGCTCACCGTGCCCAGTGAGCGAGGACTGCAGCGTAGACGCTTTGTCCAAAACGCCCTGAATGGGAATGG
GGACCCAAACAACATGGATAAAGCAGTTAAATTATACAAGAAGCTCAAAAGAGAAATAACGTTCCATGGGGC
CAAGGAGGTGTCACTAAGCTATTCAACTGGTGCACTTGCCAGTTGCATGGGCCTTATATACAACAGGATGGG
AACAGTGACCACAGAAGCTGCTTTTGGTCTAGTGTGTGCCACTTGTGAACAGATTGCTGATTCACAGCATCG
GTCTCACAGACAGATGGCTACAACCACCAATCCACTAATCAGGCATGAGAACAGAATGGTGCTGGCTAGCAC
TACGGCAAAGGCTATGGAGCAGATGGCTGGATCGAGTGAACAGGCAGCGGAGGCCATGGAGGTTGCTAATCA
GACTAGGCAGATGGTACATGCAATGAGAACTATTGGGACTCATCCTAGCTCCAGTACTGGTCTTAAAGATGA
CCTTCTTGAAAATTTGCAGGCCTACCAGAAGCGAATGGGAGTGCAGATGCAGCGATTCAAGTGATCCTCTCG
CCATTGCAGCAAATATCATTGGGATCTTGCACCTGATATTGTGGATTACTGATCGTCTTTTTTTCAAATGTA
TCTATCGTCTCTTTAAATACGGTTTGAAAAGAGGGCCTTCTACGGAAGGAGTGCCTGAGTCCATGAGGGAAG
AATATCAGCAGGAACAGCAGAGTGCTGTGGATGTTGACGATGGTCATTTTGTCAACATAGAGCTAGAGTAA-
-------------------
>A/swine/Iowa/A02216716/2017/1-982
-------------------------ATGAGTCTTCTAACCGAGGTCGAAACGTACGTTCTTTCTATCATACC
GTCAGGCCCCCTCAAAGCCGAGATCGCGCAGAGACTGGAAAGTGTCTTTGCAGGAAAGAATACAGACCTTGA
GGCTCTCATGGAATGGCTAAAGACAAGACCAATCTTGTCACCTTTGACTAAGGGAATTTTGGGATTTGTGTT
CACGCTCACCGTGCCCAGTGAGCGAGGACTGCAGCGTAGACGTTTTGTCCAAAATGCCCTGAATGGGAATGG
GGACCCAAACAACATGGATAGAGCAGTTAAACTATACAAGAAGCTCAAAAGAGAAATAACATTCCATGGGGC
CAAGGAGGTGTCACTAAGCTATTCAACTGGTGCACTTGCCAGTTGCATGGGCCTCATATACAACAGGATGGG
AACAGTGACCACAGAAGCGGCTTTTGGTCTAGTGTGTGCCACTTGTGAACAGATTGCTGATTCACAGCATCG
GTCTCACAGACAGATGGCTACAACCACCAATCCACTAATCAGGCATGAGAACAGAATGGTGCTGGCTAGCAC
TACGGCAAAGGCTATGGAACAGATGGCTGGATCGAGTGAACAGGCAGCGGAGGCCATGGAGGTTGCTAATCA
GACTAGGCAGATGGTACATGCAATGAGAACTATTGGGACTCATCCTAGTTCCAGTACTGGTCTGAAAGATGA
CCTTCTTGAAAATTTGCAGGCCTATCAGAAGCGAATGGGAGTGCAGATGCAGCGGTTTAAGTGATCCTCTCG
CCATTGCAGCAAATATCATTGGGATCTTGCACCTGATATTGTGGATTACTGATCGTCTTTTTTTCAAATGTA
TTTATCGTCGCTTTAAATACGGTTTGAAAAGAGGGCCTTCTACGGAAGGAGTGCCTGAGTCCATGAGGGAAG
AATATCAACAGGAACAGCAGAGTGCTGTGGATGTTGACGATGGTCATTTTGTCAACATAGAGCTGGAGTAA-
-------------------
>A/swine/Pennsylvania/A02218184/2017/1-982
-------------------------ATGAGTCTTCTAACCGAGGTCGAAACGTACGTTCTTTCTATCATCCC
GTCAGGCCCCCTCAAAGCCGAGATCGCGCAGAGACTGGAGAGTGTCTTTGCAGGAAAGAACACAGATCTTGA
GGCCCTAATGGAATGGCTAAAGACAAGACCAATCTTGTCACCTTTGACTAAGGGAATTTTAGGATTTGTGTT
CACGCTCACCGTGCCCAGTGAGCGAGGACTGCAGCGTAGACGCTTTGTCCAAAATGCCCTAAATGGGAATGG
GGACCCAAACAACATGGATAGAGCAGTCAAACTATACAAGAAGCTCAAAAGAGAAATAACGTTCCATGGGGC
CAAAGAGGTGTCACTAAGCTATTCAACTGGTGCACTTGCCAGTTGCATGGGCCTCATATATAACAGGATGGG
AACAGTAACCACAGAAGCTGCTTTTGGTCTAGTATGTGCCACCTGTGAACAGATTGCTGATTCACAGCATCG
GTCTCACAGACAAATGGTTACTACCACCAATCCACTAATCAGGCATGAAAACAGAATGGTGCTGGCTAGCAC
TACGGCAAAGGCTATGGAACAGATGGCTGGATCGAGTGAACAGGCAGCAGAGGCCATGGAGGTTGCTAATCA
GACTAGGCAGATGGTACATGCAATGAGGACTATTGGGACTCATCCTAGCTCCAGTGCTGGTCTGAAAGATGA
CCTTCTTGAAAATTTGCAGGCCTACCAGAAACGAATGGGAGTGCAGATGCAGCGATTCAAGTGATCCTCTCG
TCATTGCAGCAAATATCATTGGAATCTTGCACCTGATATTGTGGACTACAGATCGTCTTTTTTTCAAATGCA
TTTATCGTCGCTTTAAATACGGGTTGAAAAGAGGGCCTTCTACGGAAGGAGTGCCTGAGTCCATGAGGGAAG
AATATCAACAGGAACAGCAGAGTGCGGTGGATGTTGACGATGGTCATTTTGTCAACATAGAGCTAGAGTAA-
-------------------
>A/swine/Minnesota/A01678514/2017/1-982
-------------------------ATGAGTCTTCTGACCGAGGTCGAAACGTACGTTCTTTCTATCATCCC
GTCAGGCCCCCTCAAAGCCGAGATCGCACAGAGACTGGAAAGTGTCTTTGCAGGAAAGAACACAGATCTTGA
GGCCCTCATGGAATGGCTAAAGACAAGACCAATCTTGTCACCTCTGACTAAGGGGATTTTAGGATTTGTGTT
CACGCTCACCGTGCCCAGTGAGCGAGGACTGCAGCGTAGACGCTTTGTCCAAAATGCCCTAAATGGAAATGG
GGACCCGAACAACATGGATAGAGCAGTTAAGCTATACAAGAAGCTCAAAAGAGAAATAACATTCCATGGGGC
CAAGGAGGTGTCACTAAGCTATTCAACTGGTGCACTTGCCAGTTGCATGGGCCTCATATACAACAGGATGGG
AACAGTAACCACAGAAGCTGCTTTTGGTCTAGTGTGTGCCACTTGTGAGCAGATTGCTGATTCACAGCATCG
GTCTCACAGACAAATGGCTACTACCACCAATCCACTGATCAGGCATGAAAACAGGATGGTGCTGGCTAGCAC
TACGGCAAAGGCTATGGAACAGATGGCTGGATCGAGTGAGCAGGCAGCAGAGGCCATGGAGGTTGCTAATAA
CACTAGGCAGATGGTACATGCAATGAGAACTATTGGGACTCATCCTAGCTCCAGTGCTGGTCTGAAAGATGA
CCTTCTTGAAAATTTGCAGGCCTACCAGAAGCGAATGGGAGTGCAAATGCAGCGATTCAAATGATCCTCTCG
TCATTGCAGCAAATATCATTGGGATCTTGCACCTGATATTGTGGATTTCTGATCGTCTTTTTTTCAAATGTG
TTTATCGTCACTTTAAATACGGTTTGAAAAGAGGGCCTTCTACAGAAGGAGTGCCTGAGTCCATGAGGGAAG
AATATCAACAGGAACAGCAGAGTGCTGTGGATGTTGACGATGGTCATTTTGTCAACATAGAGCTTGAGTAA-
-------------------
>A/swine/North_Carolina/A02218894/2017/1-982
-------------------------ATGAGTCTTCTAACCGAGGTCGAAACGTACGTTCTTTCTATCATACC
GTCAGGCCCCCTCAAAGCCGAGATCGCGCAGAGACTGGAAAGTGTCTTTGCAGGAAAGAACACAGATCTTGA
GGCTCTCATGGAATGGCTAAAGACAAGACCAATCTTGTCACCTCTGACTAAGGGAATTTTAGGATTTGTGTT
CACGCTCACCGTGCCCAGTGAGCGAGGACTGCAGCGTAGACGCTTTGTCCAAAATGCCCTGAATGGGAATGG
GGACCCAAACAACATGGATAGAGCAGTTAAACTATACAAGAAGCTCAAAAGAGAAATAACGTTCCATGGGGC
CAAGGAGGTGTCACTAAGCTATTCAACTGGTGCACTTGCCAGTTGCATGGGCCTCATATACAACAGGATGGG
AACAGTGACCACAGAAGCTGCTTTTGGCCTAGTGTGTGCCACTTGTGAACAGATTGCTGATTCACAGCATCG
GTCCCACAGGCAAATGGCCACAACCACCAATCCACTAATCAGGCATGAGAACAGAATGGTGCTGGCTAGCAC
TACGGCAAAGGCTATGGAACAGATGGCTGGATCGAGTGAACAGGCAGCGGAGGCCATGGAGGTTGCTAATCA
GACTAGGCAGATGGTACATGCAATGAGAACTATTGGGACTCATCCTAGCTCCAGTACTGGTCTGAAAGATGA
CCTTCTTGAAAATTTGCAGGCCTACCAGAAGCGAATGGGAGTGCAGATGCAGCGATTCAAATGATCCTCTAG
CCATTACAGCAAATATCATCGGGATCTTGCACCTGACATTGTGGATTACTGATCGTCTTTTTTTCAAATGTA
TTTATCGTCGCTTTAAATACGGTTTGAAAAGAGGGCCTTCTACGGAAGGAGTGCCTGAGTCCATGAGGGAAG
AATATCAACAGGAACAGCAGAGTGCTGTGGATGTTGACGATGGTCATTTTGTCAACATAGAGCTAGAGTAA-
-------------------
>A/swine/Nebraska/A02219793/2017/1-982
-------------------------ATGAGTCTTCTAACCGAGGTCGAAACGTACGTTCTTTCTATCATCCC
GTCAGGCCCCCTCAAAGCCGAGATCGCGCAGAGACTGGAAAGTGTCTTTGCAGGAAAGAACACAGATCTTGA
GGCTCTCATGGAATGGCTAAAGACAAGACCAATCTTGTCACCTCTGACTAAGGGAATTTTAGGATTTGTGTT
CACGCTCACCGTGCCCAGTGAGCGAGGACTGCAGCTTAGACGCTTTGTCCAAAATGCCCTAAATGGGAATGG
GGACCCGAACAACATGGATAGAGCAATTAAACTATACAAGAAGCTAAAAAGAGAAATAACGTTCCATGGGGC
CAAGGAGGTGTCACTAAGCTATTCAACTGGTGCACTTGCCAGTTGTATGGGCCTCATATACAACAGAATGGG
AACAGTGACCACAGAAGCTGCTTTTGGTCTAGTGTGTGCCACCTGTGAGCAGATTGCTGATTCACAGCATCG
GTCTCACAGACAAATGGCCACCACCACCAATCCACTAATCAGGCATGAAAACAGAATGGTGCTGGCTAGCAC
TACGGCAAAGGCTATGGAACAGATGGCTGGATCGAGTGAACAGGCAGCAGAGGCCATGGAGGTTGCTAATCA
GACTAGGCAGATGGTGCATGCAATGAGAACTATTGGGACCCATCCCAGCTCCAGTGCTGGTCTGAAAGATGA
CCTTCTTGAAAATTTGCAGGCCTACCAGAAGCGAATGGGAGTGCAGATGCAGCGATTCAAGTGATCCTCTCG
TCATTGCAGCAAATATCATTGGGATCTTGCACCTGATATTGTGGATTACTGATCGTCTTTTTTTCAAATGTA
TTTATCGTCGCTTTAAATACGGTTTGAAAAGAGGGCCTTCTACAGAAGGAGTGCCTGAGTCCATGAGGGAAG
AATATCAACAGGAACAGCAGAGTGCTGTGGATGTTGACGATGGTCATTTTGTCAACATAGAGCTAGAGTAA-
-------------------
>A/swine/Nebraska/A02221499/2017/1-982
-------------------------ATGAGTCTTCTAACCGAGGTCGAAACGTACGTTCTTTCTATCATCCC
GTCAGGCCCCCTCAAAGCCGAGATCGCGCAGAGACTGGAGAGTGTCTTTGCGGGAAAGAACACAGATCTTGA
AGCTCTAATGGAATGGCTAAAGACAAGACCAATCTTGTCACCTCTGACTAAGGGAATCTTAGGATTTGTGTT
CACGCTCACCGTGCCCAGTGAGCGAGGACTGCAGCGTAGACGCTTTGTCCAAAATGCCCTAAATGGGAATGG
GGACCCGAACAACATGGATAGAGCAGTTAAACTATATAAGAAGCTCAAAAGAGAAATAACGTTCCATGGGGC
CAAGGAAGTGTCGCTAAGCTATTCAACTGGTGCACTTGCCAGTTGCATGGGCCTTATATACAACAGGATGGG
AACAGTGACCACAGAAGCTGCTTTTGGCCTAGTGTGTGCCACTTGTGAACAGATAGCTGATTCACAGCATAG
GTCCCACAGACAAATGGCTACTACTACCAATCCATTAATCAGGCATGAAAACAGAATGGTTCTGGCTAGCAC
TACGGCAAAGGCTATGGAACAGATGGCTGGATCGAGTGAACAGGCAGCAGAGGCCATGGAGGTTGCTAACCA
GACTAGGCAGATGGTGCATGCAATGAGAACCATTGGGACTCATCCTAGCTCCAGTGCTGGTCTGAAAGATGA
CCTCCTTGAAAATTTGCAGGCCTACCAGAAGCGAATGGGAGTGCAGATGCAGCGATTCAAGTGATCCTCTCG
TCATTGCAGCAAATATCATTGGGATCTTGCACCTGATATTGTGGATTACTGATCGTCTTTTTTTCAAATGCA
TTTATCGTCGCTTTAAATACGGTTTGAAAAGAGGGCCTTCTACGGAAGGAGTGCCTGAGTCCATGAGGGAAG
AATATCAACAGGAACAGCAGAGTGCTGTGGATGTTGACGATGGTCATTTTGTCAACATAGAGCTAGAGTAA-
-------------------
>A/swine/Iowa/A02221508/2017/1-982
-------------------------ATGAGTCTTCTAACCGAGGTCGAAACGTACGTTCTTTCTATCATCCC
GTCAGGCTCCCTCAAAGCCGAGATCGCGCAGAGACTGGAAAGTGTTTTTTCAGGAAAGAACACAGATCTTGA
GGCTCTCATGGAATGGCTAAAGACAAGACCAATCTTGTCACCTCTGACCAAGGGGATTTTAGGATTTGTGTT
CACGCTCACCGTGCCCAGTGAGCGAGGACTGCAGCGTAGACGCTTTGTCCAAAATGCCCTAAATGGGAATGG
GGACCCGAACAACATGGATAGAGCAGTTAAACTATACAAGAAGCTCAAAAGAGAAATAACGTTCCATGGGGC
CAAGGAGGTGTCACTAAGCTATTCAACTGGTGCACTTGCCAGTTGCATGGGCCTCATATACAACAGGATGGG
AACAGTGACCACAGAAGCTGCTTTTGGTCTAGTGTGTGCCACTTGTGAACAGATTGCTGATTCACAGCATCG
GTCTCACAGACAAATGGCTACTACCACCAATCCACTAATCAGACATGAAAACAGAATGGTGCTAGCTAGCAC
TACGGCAAAGGCTATGGAACAGATGGCTGGATCGAGTGAACAGGCAGCAGAGGCCATGGAGGTTGCTAATCA
AACTAGGCAGATGGTACATGCAATGAGAACTATTGGGACTCATCCTAGCTCCAGTGCTGGTCTAAAGGATGA
CCTTCTTGAAAATTTGCAGGCTTACCAGAAGCGAATGGGAGTGCAGATGCAGCGATTCAAATGACCCTCTCA
TCATTGCAGCAAATATCATTGGGATCTTGCACCTGATATTGTGGATTACTGATCGTCTTTTTTTCAAATGTA
TTTATCGTCGCTTTAAATACGGTTTGAAAAGAGGGCCTTCTACGGAAGGAGTGCCTAAGTCCATGAGGGAAG
AATATCAACAGGAACAGCAGAGTGCTGTGGATGTTGACGATAGTCATTTTGTCAACATAGAGCTAAAGTAA-
-------------------
>A/swine/Iowa/A02221506/2017/1-982
-------------------------ATGAGTCTTCTAACCGAGGTCGAAACGTACGTTCTTTCTATCATCCC
GTCAGGCCCCCTCAAAGCCGAGATCGCGCAGAGACTGGAAAGTGTATTTGCAGGAAAGAACACAGATCTTGA
GGCTCTCATGGAATGGCTAAAGACAAGACCAATCTTGTCACCTCTGACTAAGGGAATTTTAGGATTTGTGTT
CACGCTCACCGTGCCCAGTGAGCGAGGACTGCAGCGTAGACGCTTTGTCCAAAATGCCCTAAATGGGAATGG
GGACCCGAACAACATGGATAGAGCAGTTAAACTATACAAGAAGCTCAAAAGAGAAATAACGTTCCATGGGGC
TAAGGAGGTGTCACTAAGCTATTCAACTGGTGCACTTGCCAGTTGCATGGGCCTCATATACAACAGGATGGG
AACAGTGACCACAGAAGCTGCTTTTGGTCTAGTGTGTGCCACCTGTGAACAGATTGCTGATTCACAGCATCG
ATCTCACAGACAAATGGTTACTACCACCAATCCACTAATCAGGCATGAAAACAGAATGGTGCTGGCTAGCAC
TACTGCAAAGGCTATGGAACAGATGGCTGGATCGAGTGAACAGGCAGCAGAGGCCATGGAGGTTGCTAATCA
GACTAGGCAGATGGTACATGCAATGAGAACTATTGGGACTCATCCTAGCTCCAGTGCTGGTCTGAAGGATGA
CCTTCTTGAAAATTTACAGGCCTACCAGAAGCGAATGGGAGTGCAAATGCAGCGATTCAAGTGATCCTCTCG
TCATTGCAGCAAATATCATTGGGATCTTGCACTTGATATTGTGGATTACTGATCGTCTTTTTTTCAAATGTA
TTTATCGTCGCTTTAAATACGGTTTGAAAAGAGGGCCTCCTACAGAAGGAGTGCCTGAGTCCATGAGGGAAG
AATATCAACAGGAACAGCAGAGTGCTGTGGATGTTGACGATGGTCATTTTGTCAACATAGAGCTAGAGTAA-
-------------------
>A/swine/Minnesota/A02221495/2017/1-982
-------------------------ATGAGTCTTCTGACCGAGGTCGAAACGTACGTTCTTTCTATCATCCC
GTCAGGCCCCCTCAAAGCCGAGATCGCACAGAGACTGGAAAGTGTCTTTGCAGGAAAGAACACAGATCTTGA
GGCCCTCATGGAATGGCTAAAGACAAGACCAATCTTGTCACCTCTGACTAAGGGGATTTTAGGATTTGTGTT
CACGCTCACCGTGCCCAGTGAGCGAGGACTGCAGCGTAGACGCTTTGTCCAAAATGCCCTAAATGGAAATGG
GGACCCGAACAACATGGATAGAGCAGTTAAGCTATACAAGAAGCTCAAAAGAGAAATAACATTCCATGGGGC
CAAGGAGGTGTCACTAAGCTATTCAACTGGTGCACTTGCCAGTTGTATGGGCCTCATATACAACAGGATGGG
AACAGTAACCACAGAAGCTGCTTTTGGTCTAGTGTGTGCCACTTGTGAACAGATTGCTGATTCACAGCATCG
GTCTCACAGACAAATGGCTACTACCACCAATCCACTGATCAGGCATGAAAACAGGATGGTGCTGGCTAGCAC
TACGGCAAAGGCTATGGAACAGATGGCTGGATCGAGTGAGCAGGCAGCAGAGGCCATGGAGGTTGCTAATAA
GACTAGGCAGATGGTACATGCAATGAGAACTATTGGGACTCATCCTAGCTCCAGTGCTGGTCTGAAAGATGA
TCTTCTTGAAAATTTGCAGGCCTACCAGAAGCGAATGGGAGTGCAAATGCAGCGATTCAAATGATCCTCTCG
TCATTGCAGCAAATATCATTGGGATCTTGCACCTGATATTGTGGATTTCTGATCGTCTTTTTTTCAAATGTG
TTTACCGTCACTTTAAATACGGTTTGAAAAGAGGGCCTTCTACAGAAGGAGTGCCTGAGTCCATGAGGGAAG
AATATCAACAGGAACAGCAGAGTTCTGTGGATGTTGACGATGGTCATTTTGTCAACATAGAGCTAGAGTAA-
-------------------
>A/swine/Indiana/A02218760/2017/1-982
-------------------------ATGAGTCTTCTAACCGAGGTTGAAACGTACGTTCTTTCTATCATACC
GTCAGGCCCCCTCAAAGCCGAGATCGCGCAGAGACTGGAAAGTGTCTTTGCAGGAAAAAACACAGATCTTGA
AGCTCTCATGGAATGGCTAAAGACAAGACCAATCTTGTCACCTCTGACTAAGGGAATTTTAGGATTTGTGTT
CACGCTCACCGTGCCCAGTGAGCGAGGACTGCAGCGTAGACGCTTTGTCCAAAATGCCCTGAATGGGAATGG
GGACCCAAACAACATGGATAGAGCAGTTAAACTATACAAGAAGCTCAAAAGAGAAATAACATTCCATGGGGC
CAAGGAGGTGTCACTAAGCTATTCAACTGGTGCACTTGCCAGTTGCATGGGCCTCATATACAACAGGATGGG
AACAGTAACCACAGAAGCTGCTTTTGGTCTAGTGTGTGCCACTTGTGAACAGATTGCTGATTCACAGCATCG
GTCTCACAGACAGATGGCTACAACCACCAATCCACTAATCAGGCATGAGAACAGAATGGTGCTGGCTAGCAC
TACGGCAAAGGCTATGGAACAGATGGCTGGATCGAGTGAACAGGCAGCGGAGGCCATGGAGGTTGCTAATCA
GACTAGGCAGATGGTACATGCAATGAGAACCATTGGGACTCATCCTAGCTCCAGTACTGGTCTGAAAGATGA
CCTTCTTGAAAATTTGCAGGCCTACCAGAAGCGAATGGGAGTGCAGATGCAGCGATTCAAGTGACCCTCTCG
CCATTGCAGCAAATATCATTGGGATCTTGCACCTGATATTGTGGATTGCTGATCGTCTTTTTTTCAAATGTA
TTTATCGTCGCTTTAAATACGGTTTGAAAAGAGGGCCTTCAACGGAAGGAGTGCCTGAGTCCATGAGGGAAG
AATACCAACAGGAACAGCAGAGTGCTGTGGATGTTGACGATGGTCATTTTGTCAACATAGAGCTGGAGTAA-
-------------------
>A/swine/Illinois/A02219794/2017/1-982
-------------------------ATGAGTCTCCTAACCGAGGTCGAAACGTACGTTCTTTCTATCATACC
GTCAGGCCCCCTCAAAGCCGAGATCGCGCAGAGACTGGAAAGTGTCTTTGCAGGAAAGAATACAGACCTTGA
GGCTCTCATGGAATGGCTAAAGACAAGACCAATCTTGTCACCTTTGACTAAGGGAATTTTAGGATTTGTGTT
CACGCTCACCGTGCCCAGTGAGCGAGGACTGCAGCGTAGACGCTTTGTCCAAAATGCCCTGAATGGGAATGG
GGACCCAAACAACATGGATAGGGCAGTTAAACTATACAAGAAGCTCAAAAGAGAAATAACGTTCCATGGGGC
CAAGGAGGTGTCACTAAGCTATTCAACTGGTGCACTTGCCAGTTGCATGGGCCTCATATACAACAGGATGGG
AACAGTGACCACAGAAGCTGCTTTTGGTCTAGTGTGTGCCACTTGTGAACAGATTGCTGATTCACAGCATCG
GTCTCACAGACAGATGGCTACAACCACCAATCCACTAATCAGGCATGAGAACAGAATGGTGCTGGCTAGCAC
TACGGCAAAGGCTATGGAACAGATGGCTGGATCGAGTGAACAGGCAGCGGAAGCCATGGAGGTTGCTAATCA
GACTAGGCAGATGGTACATGCAATGAGAACTATTGGGACTCATCCTAGTTCCAGTACTGGTCTGAAAGATGA
CCTTCTTGAAAATTTGCAGGCCTATCAGAAGCGAATGGGAGTGCAGATGCAGCGGTTTAAGTGATCCTCTCG
CAATTGCAGCAAATATCATTGGGATCTTGCACCTGATATTGTGGATTATTGATCGTCTTTTTTTCAAATGTA
TTTATCGTCGCTTTAAATACGGTTTGAAAAGAGGGCCTTCTACGGAAGGAGTGCCTGAGTCCATGAGGGAAG
AATATCAACAGGAACAGCAGAGTGCTGTGGATGTTGACGATGGTCATTTTGTCAACATAGAGCTGGAGTAA-
-------------------
>A/swine/Ohio/A02219547/2017/1-982
-------------------------ATGAGTCTTCTAACCGAGGTCGAAACGTACGTTCTTTCTATCATCCC
GTCAGGCCCCCTCAAAGCCGAGATCGCGCAGAGACTGGAAAGTGTATTTGCAGGAAAGAACACAGACCTTGA
GGCTCTCATGGAATGGTTAAAGACAAGACCAATCTTGTCACCTCTGACTAAGGGAATTTTAGGATTTGTGTT
CACGCTCACCGTGCCCAGTGAGCGAGGACTGCAGCGTAGACGCTTTGTCCAAAATGCCCTAAATGGGAATGG
GGACCCGAACAACATGGATAGAGCAGTTAAACTATACAAGAAGCTCAAAAGAGAAATAACGTTCCATGGGGC
TAAGGAGGTGTCACTGAGCTATTCAACTGGTGCACTTGCCAGTTGCATGGGCCTCATATACAACAGGATGGG
AACAGTGACCACAGAAGCTGCTTTTGGTCTAGTGTGTGCCACTTGTGAACAGATTGCTGATTCACAGCATCG
ATCTCACAGACAAATGGCTACTACCACCAATCCACTAATCAGGCATGAAAATAGAATGGTGCTGGCTAGCAC
TACTGCAAAGGCTATGGAACAGATGGCTGGATCGAGTGAACAGGCAGCAGAGGCCATGGAGGTTGCTAATCA
GACTAGGCAGATGGTACATGCAATGAGAACTATTGGGACTCATCCTAGCTCCAGTGCTGGTCTGAAAGATGA
CCTTCTTGAAAATTTACAGGCCTACCAGAAGCGAATGGGAGTGCAAATGCAGCGATTCAAGTGATCCTCTCG
TCATTGCAGCAAATATCATTGGGATCTTGCACCTGATATTGTGGATTATTGATCGTCTTTTTTTCAAATGTA
TTTATCGTCGCTTTAAATACGGTTTGAAAAGAGGGCCTTCTACAGAAGGAGTGCCTGAGTCCATGAGGGAAG
AATATCAACAGGAACAGCAGAGTGCTGTGGATGTTGACGATGGTCATTTTGTCAACATAGAGCTAGAGTAA-
-------------------
>A/swine/North_Carolina/A02219753/2017/1-982
-------------------------ATGAGTCTTCTAACCGAGGTCGAAACGTACGTTCTTTCTATCATACC
GTCAGGCCCCCTCAAAGCCGAGATCGCGCAGAGACTGGAAAGTGTCTTTGCAGGAAAGAACACAGATCTTGA
AGCTCTCATGGAATGGCTAAAGACAAGACCAATCTTGTCACCTCTGACTAAGGGAATTTTAGGATTTGTATT
CACGCTCACCGTGCCCAGTGAGCGAGGACTGCAGCGTAGACGCTTTGTCCAAAATGCCCTGAATGGGAATGG
GGACCCAAACAACATGGATAGAGCAGTTAAACTATACAAGAAGCTCAAAAGAGAAATAACATTCCATGGGGC
CAAGGAGGTGTCACTGAGCTATTCAACTGGTGCACTTGCCAGTTGCATGGGCCTCATATACAACAGGATGGG
AACAGTGACCACAGAAGCTGCTTTTGGTCTAGTGTGTGCCACTTGTGAACAGATTGCTGATTCACAGCATCG
GTCTCACAGACAGATGGCTACAACCACCAATCCACTAATTAGGCATGAGAACAGAATGGTGCTGGCTAGCAC
TACGGCAAAGGCTATGGAACAGATGGCTGGATCGAGTGAACAGGCAGCGGAGGCCATGGAGGTTGCTAATCA
GACTAGGCAGATGGTACATGCAATGAGAACTATTGGGACTCATCCTAGCTCCAGTACTGGTCTGAAAGATGA
CCTTCTTGAAAATTTGCAGGCCTACCAGAAGCGAATGGGAGTGCAGATTCAGCGATTCAAGTGATCCTCTCG
CCATTGCAGCAAATATCATTGGGATCTTGCACCTGATATTGTGGATTGCTGATCGTCTTTTTTTCAAATGTA
TTTATCGTCGCTTTAAATACGGTTTGAAAAGAGGGCCTTCAACGGAAGGAGTGCCTGAGTCCATGAGGGAAG
AATACCAACAGGAACAGCAGAGTGCTGTGGATGTTGACGATGGTCATTTTGTCAACATAGAGCTAGAGTAA-
-------------------
>A/swine/North_Carolina/A01785282/2017/1-982
-------------------------ATGAGTCTTCTAACCGAGGTCGAAACGTACGTTCTTTCTATCATCCC
GTCAGGCTCCCTCAAAGCCGAGATCGCGCAGAGACTGGAAAGTGTTTTTTCAGGAAAGAACACAGATCTTGA
GGCTCTCATGGAATGGCTAAAGACAAGACCAATCTTGTCACCTCTGACTAAGGGGATTTTAGGATTTGTGTT
CACGCTCACCGTGCCCAGCGAGCGAGGACTGCAGCGTAGACGCTTTGTCCAAAATGCCCTAAATGGGAATGG
GGACCCGAACAACATGGATAGAGCAGTTAAACTATACAAGAAGCTCAAAAGAGAAATAACGTTCCATGGGGC
CAAGGAGGTGTCACTAAGCTATTCAACTGGTGCACTTGCCAGTTGCATGGGCCTCATATACAACAGGATGGG
AACAGTGACCACAGAAGCTGCCTTTGGTCTGGTGTGTGCCACTTGTGAACAGATTGCTGATTCACAGCATAG
GTCTCACAGACAAATGGCTACTACCACCAATCCACTAATCAGACATGAAAACAGAATGGTGCTGGCTAGCAC
TACGGCAAAGGCTATGGAACAAATGGCTGGATCGAGTGAACAGGCAGCAGAGGCCATGGAGGTTGCTAATCA
AACTAGGCAGATGGTACATGCAATGAGAACTATTGGGACTCATCCTAGCTCCAGTGCTGGTCTGAAAGATGA
CCTTCTTGAAAATTTGCAGGCCTACCAGAAGCGAATGGGAGTGCAGATGCAGCGATTCAAGTGACCCTCTCG
TCATCGCAGCAAATATCATTGGGATCTTGCACCTGATATTGTGGATTACTGATCGTCTTTTTTTCAAATGTA
TTTATCGTCGCTTTAAATACGGTTTGAAAAGAGGGCCTTCTACGGAAGGAGTGCCTGAGTCCATGAGGGAAG
AATATCAACAGGAACAGCAGAGTGCTGTGGATGTTGACGATGGTCATTTTGTCAACATAGAGCTAGAGTAA-
-------------------
>A/swine/Oklahoma/A02219505/2017/1-982
-------------------------ATGAGTCTTCTAACCGAGGTCGAAACGTACGTTCTTTCTATCATACC
GTCAGGCCCCCTCAAAGCCGAGATCGCGCAGAGACTGGAAAGTGTCTTTGCAGGAAAGAACACAGATCTTGA
GGCTCTCATGGAATGGCTAAAGACAAGACCAATCTTGTCACCTCTGACTAAGGGGATTTTAGGATTTGTGTT
CACGCTCACCGTGCCCAGTGAGCGAGGACTGCAGCGTAGACGCTTTGTCCAAAACGCCCTGAATGGGAATGG
GGACCCAAACAACATGGATAAAGCAGTTAAATTATACAAGAAGCTCAAAAGAGAAATAACGTTCCATGGGGC
CAAGGAGGTGTCACTAAGCTATTCAACTGGTGCACTTGCCAGTTGCATGGGCCTCATATACAACAGGATGGG
AACAGTGACCACAGAAGCTGCTTTTGGTCTAGTGTGTGCCACTTGTGAACAGATTGCTGATTCACAGCATCG
GTCTCACAGACAGATGGCTACAACCACCAATCCACTAATCAGGCATGAGAACAGAATGGTGCTGGCTAGCAC
TACGGCAAAGGCTATGGAGCAGATGGCTGGATCGAGTGAACAGGCAGCGGAGGCCATGGAGGTTGCTAATCA
GACTAGGCAGATGGTACATGCAATGAGAACTATTGGGACTCATCCTAGCTCCAGTACTGGTCTGAAAGATGA
CCTTCTTGAAAATTTGCAGGCCTACCAGAAGCGAATGGGAGTGCAGATGCAGCGATTCAAGTGATCCTCTCG
CCATTGCAGCAAATATCATTGGGATCTTGCACCTGATATTGTGGATTACTGATCGTCTTTTTTTCAAATGTA
TCTATCGTCTCTTTAAATACGGTTTGAAAAGAGGGCCTTCTACGGAAGGAGTGCCTGAGTCCATGAGGGAAG
AATATCAGCAGGAACAGCAGAGTGCTGTGGATGTTGACGATGGTCATTTTGTCAACATAGAGCTAGAGTAA-
-------------------
>A/swine/Iowa/A02219544/2017/1-982
-------------------------ATGAGTCTTCTGACCGAGGTCGAAACGTACGTTCTTTCTATCATCCC
GTCGGGCCCCCTCAAAGCCGAGATCGCACAGAGACTGGAAAGTGTCTTTGCAGGAAAGAACACAGATCTTGA
GGCCCTCATGGAATGGCTAAAGACAAGACCAATCTTGTCACCTCTGACTAAGGGGATTTTAGGATTTGTGTT
CACGCTCACCGTGCCCAGTGAGCGAGGACTGCAGCGTAGACGCTTTGTCCAAAATGCCCTAAATGGAAATGG
GGACCCGAACAACATGGATAGAGCAGTTAAGCTATACAAGAAGCTCAAAAGAGAAATAACATTCCATGGGGC
CAAGGAGGTGTCACTAAGCTATTCAACTGGTGCACTTGCCAGTTGCATGGGCCTCATATACAACAGGATGGG
AACAGTAACCACAGAAGCTGCTTTTGGTCTAGTGTGTGCCACTTGTGAACAGATTGCTGATTCACAGCATCG
GTCTCACAGACAAATGGCTACTACCACCAATCCACTGATCAGGCATGAAAACAGGATGGTGCTGGCTAGCAC
TACGGCAAAGGCTATGGAACAGATGGCTGGATCGAGTGAGCAGGCAGCAGAGGCCATGGAGGTTGCTAATAA
GACTAGGCAGATGGTACATGCAATGAGAACTATTGGGACTCATCCTAGCTCCAGTGCTGGTCTGAAAGATGA
TCTTCTTGAAAATTTGCAGGCCTACCAGAAGCGAATGGGAGTGCAAATGCAGCGATTCAAATGATCCTCTCG
TCATTGCAGCAAATATCATTGGGATCTTGCACCTGATATTGTGGATTTCTGATCGTCTTTTTTTCAAATGTG
TTTATCGTCACTTTAAATACGGTTTGAAAAGAGGGCCTTCTACAGAAGGAGTGCCTGAGTCCATGAGGGAGG
AATATCAACAGGAACAGCAGAGTCCTGTGGATGTTGACGATGGTCATTTTGTCAACATAGAGCTAGAGTAA-
-------------------
>A/swine/Illinois/A02219783/2017/1-982
-------------------------ATGAGTCTTCTAACCGAGGTCGAAACGTACGTTCTTTCTATCATCCC
GTCAGGCCCCCTCAAAGCCGAGATCGCGCAGAGACTGGAAAGTGTATTTGCAGGAAAGAACACAGATCTTGA
GGCTCTCATGGAATGGCTAAAGACAAGACCAATCTTGTCACCTCTGACTAAGGGAATTTTAGGATTTGTGTT
CACGCTCACCGTGCCCAGTGAGCGAGGACTGCAGCGTAGACGTTTTGTCCAAAATGCCCTAAATGGGAATGG
GGACCCGAACAACATGGATAGAGCAGTTAAACTATACAAGAAGCTCAAAAGAGAAATAACGTTCCATGGGGC
TAAGGAGGTGTCACTAAGCTATTCAACTGGTGCACTTGCCAGTTGCATGGGCCTCATATACAACAGGATGGG
AACAGTGACCACAGAAGCTGCTTTTGGTCTAGTGTGTGCCACTTGTGAACAGATTGCTGATTCACAGCATCG
ATCTCACAGACAAATGGCCACTACCACCAATCCACTAATCAGGCATGAAAACAGAATGGTGCTGGCTAGCAC
TACTGCAAAGGCTATGGAACAGATGGCTGGATCGAGTGAACAGGCAGCAGAGGCCATGGAGGTTGCTAATCA
GACTAGGCAGATGGTACATGCAATGAGGACTATTGGGACTCATCCTAGCTCCAGTGCTGGTCTGAAGGATGA
CCTTCTTGAAAATTTACAGGCCTACCAGAAGCGAATGGGAGTGCAAATGCAGCGATTCAAGTGATCCTCTCG
TCATTGCAGCAAATATCATTGGGATCTTGCACCTGATATTGTGGATTACTGATCGTCTTTTTTTCAAATGTA
TTTATCGTCGCTTTAAATACGGTTTGAAAAGAGGGCCTCCTACAGAAGGAGTGCCTGAGTCCATGAGGGAAG
AATATCAACAGGAACAGCAGAGTGCTGTAGATGTTGACGATGGTCATTTTGTCAACATAGAGCTAGAGTAA-
-------------------
>A/swine/Iowa/A02219790/2017/1-982
-------------------------ATGAGTCTTCTAACCGAGGTCGAAACGTACGTTCTTTCTATCATACC
GTCAGGCCCCCTCAAAGCCGAGATCGCGCAGAGACTGGAAAGTGTCTTTGCAGGAAAGAACACGGATCTTGA
GGTTCTCATGGAATGGCTAAAGACAAGACCAATCTTGTCACCTCTGACTAAGGGAATTTTAGGATTTGTGTT
CACGCTCACCGTGCCCAGTGAGCGAGGACTGCAGCGTAGACGCTTTGTCCAAAATGCCCTGAATGGGAATGG
GGACCCAAACAACATGGATAGAGCAGTTAAACTATACAAGAAGCTCAAAAGAGAAATAACGTTCCATGGGGC
CAAGGAGGTGTCACTAAGCTATTCAACTGGTGCACTTGCCAGTTGCATGGGCCTCATATACAACAGGATGGG
AACAGTGACCACAGAAGCTGCTTTTGGTCTAGTGTGCGCCACTTGTGAACAGATTGCTGATTCACAGCATCG
GTCTCACAGACAAATGGCTACAACCACCAATCCACTAATTAGGCATGAGAACAGAATGGTTCTGGCTAGCAC
TACGGCAAAGGCTATGGAACAGATGGCTGGGTCGAGTGAACAGGCAGCGGAGGCCATGGAGGTTGCTAATCA
GACTAGGCAGATGGTACATGCAATGAGAACTATTGGAACTCATCCTAGCTCCAGTACTGGTCTGAAAGATGA
CCTTCTTGAAAATTTGCAGGCCTACCAGAAGCGAATGGGAGTGCAGATGCAGCGATTCAAGTGATCCTCTCG
CCATTGCAGCAAATATCATTGGGATCTTGCACCTGACATTGTGGATTACTGATCGTCTTTTTTTCAAATGTA
TTTATCGTCGCTTTAAATACGGTTTGAAAAGAGGGCCTTCTACGGAAGGGGTGCCTGAATCCATGAGGGAAG
AATATCAACAGGAACAGCAGAGTGCTGTGGATGTTGACGATGGTCATTTTGTCAACATAGAGCTAGAGTAA-
-------------------
>A/swine/North_Carolina/A02218906/2017/1-982
-------------------------ATGAGTCTTCTAACCGAGGTCGAAACGTACGTTCTTTCTATCATACC
ATCAGGCCCCCTCAAAGCCGAGATCGCGCAGAGACTGGAAAGTGTCTTTGCAGGAAAGAACACAGATCTTGA
GGCTCTAATGGAATGGCTAAAGACAAGACCAATCTTGTCACCTCTGACTAAGGGAATTTTAGGGTTTGTGTT
CACGCTCACCGTGCCCAGTGAGCGAGGACTGCAGCGTAGACGCTTTGTCCAAAATGCCCTGAATGGAAATGG
GGACCCAAACAACATGGATAGAGCAGTTAAACTATACAAGAAGCTCAAAAGAGAAATAACGTTCCATGGGGC
AAAGGAGGTTTCACTAAGCTATTCAACTGGTGCACTTGCCAGTTGCATGGGCCTCATATACAACAGGATGGG
AACAGTAACCACAGAAGCTGCTTTTGGTCTAGTGTGTGCCACTTGTGAACAGATTGCTGATTCACAGCATCG
GTCTCACAGACAGATGGCTACTACCACCAACCCACTAATCAGGCATGAAAACAGAATGGTGCTAGCTAGCAC
TACAGCAAAGGCTATGGAACAGATGGCTGGATCGAGTGAACAGGCAGCGGAGGCCATGGAGGTTGCTAATCA
GACTAGGCAGATGGTACATGCAATGAGAACTATTGGGACTCATCCTAGCTCCAGTACTGGTCTGAAAGATGA
CCTTCTTGAAAATTTGCAGGCCTACCAGAAGCGAATGGGAGTGCAGATGCAGCGATTCAAGTGATCCTCTCG
CCATTGCAGCAAATATCATTGGGATCTTGCACCTGATATTGTGGATTACTGATCGTCTTTTTTTCAAATGCA
TTTATCGTCGCTTTAGATACGGTTTGAAAAGAGGGCCTTCTACGGAAGGAGTGCCTGAGTCCATGAGGGAAG
AATATCAACAGGAACAGCAGAGTGCTGTGGATGTTGACGATGGTCATTTTGTCAACATAGAGCTAGAGTAA-
-------------------
>A/swine/Iowa/A02219785/2017/1-982
-------------------------ATGAGTCTTCTAACCGAGGTCGAAACGTACGTTCTTTCTATCGTCCC
GTCAGGCCCCCTCAAAGCCGAGATCGCGCAGAGACTGGAAAATGTCTTTGCAGGAAAGAACACAGATCTTGA
GGCTCTAATGGAATGGCTAAAGACAAGACCAATCTTGTCACCTCTGACTAAGGGAATTTTAGGGTTTGTGTT
CACGCTCACCGTGCCCAGTGAGCGAGGACTGCAGCGTAGACGCTTTATCCAAAATGCCCTAAATGGGAATGG
GGACCCGAACAACATGGATAGAGCAGTTAAACTATACAAGAAGCTCAAAAGAGAAATAACGTTCCATGGGGC
CAAGGAGGTGTCGCTAAGCTATTCAACTGGTGCACTTGCCAGTTGCATGGGCCTCATATACAACAGGATGGG
AACAGTGACCACAGAAGCTGCTTTTGGCCTAGTGTGTGCCACTTGTGAACAGATTGCTGATTCACAGCATCG
GTCCCACAGACAAATGGCTACTACTACCAATCCATTAATCAGGCATGAAAACAGAATGGTTCTGGCTAGCAC
TACGGCAAAGGCGATGGAACAGATGGCTGGATCGAGTGAACAGGCAGCAGAGGCCATGGAGGTTGCTAATCA
GACTAGGCAGATGGTGCATGCAATGAGAACTATTGGGACTCATCCTAGTTCCAGTGCTGGTCTGAAAGATGA
CCTCCTTGAAAATTTGCAGGCCTACCAGAAGCGAATGGGAGTGCAGATGCAGCGATTCAAGTGATCCTCTCG
TCATTGCAGCAAATATCATTGGGATCTTGCACCTGATATTGTGGATTACTGATCGTCTTTTTTTCAAATGCA
TTTATCGTCGCTTTAAATACGGTTTGAAAAGAGGGCCTTCTACGGAAGGAGTGCCTGAGTCCATGAGGGAAG
AATATCAACAGGAACAGCAGAGTGCTGTGGATGTTGACGATGGTCATTTTGTCAACATAGAGCTAGAGTAA-
-------------------
>A/swine/South_Dakota/A01678503/2017/1-982
-------------------------ATGAGTCTTCTAACCGAGGTCGAAACGTACGTTCTTTCTATCATCCC
GTCAGGCCCCCTCAAAGCCGAGATCGCGCAGAGACTGGAAAGTGTTTTTTCAGGAAAGAACACAGATCTTGA
GGCGCTCATGGAATGGCTAAAGACAAGACCAATCTTGTCACCTCTGACTAAGGGGATTTTAGGATTTGTGTT
CACGCTCACCGTGCCCAGTGAGCGAGGACTGCAGCGTAGACGCTTTGTTCAAAATGCCTTAAATGGGAATGG
GGACCCGAACAACATGGATAGAGCAGTTAAACTATACAAGAAGCTCAAAAGAGAAATAACGTTCCATGGGGC
CAAGGAGGTGTCACTAAGCTATTCAACTGGTGCACTTGCCAGTTGCATGGGCCTCATATACAACAGGATGGG
AACAGTGACCACAGAAGCTGCTTTGGGTCTAGTGTGTGCCACTTGTGAACAGATTGCTGATTCACAGCATCG
GTCTCACAGACAAATGGCTACTACCACCAATCCACTAATAAGGCATGAAAACAGAATGGTGCTGGCTAGCAC
TACGGCAAAGGCTATGGAACAGATGGCTGGATCGAGTGAACAGGCAGCAGAGGCCATTGAGGTTGCTAATCA
AACTAGGCAGATGGTACATGCAATGAGAACTATTGGGACTCATCCTAGCTCCAGCGCTGGTCTGAAAGATGA
CCTTCTTGAAAATTTGCAGGCATACCAGAAGCGAATGGGAGTGCAGATGCAGCGATTCAAATGATCCTCTCG
TCATTGCAGCAAATATCATTGGGATCTTGCACCTGATATTGTGGATTACTGATCGTCTTTTTTTCAAATGTA
TTTATCGTCGCTTTAAATACGGTTTGAAAAGAGGGCCTTCTACGGAAGGAGTGCCTGAGTCCATGAGGGAAG
AATATCAACAAGAACAGCAGAGTGCTGTGGATGTTGACGATGGTCATTTTGTCAACATAGAGCTAGAGTAA-
-------------------
>A/swine/USA/A01812272/2017/1-982
-------------------------ATGAGTCTTCTAACCGAGGTCGAAACGTACGTTCTTTCTATCATCCC
GTCAGGCCCCCTCAAAGCCGAGATCGCGCAGAGACTGGAGAGTGTCTTTGCAGGAAAGAACACAGATCTTGA
GGCTCTCATGGAATGGCTAAAGACAAGACCAATCTTGTCACCTTTGACTAAGGGAATTTTAGGATTTGTGTT
CACGCTCACCGTGCCCAGTGAGCGAGGACTGCAGCGTAGACGCTTTGTCCAAAATGCCCTAAATGGGAATGG
GGACCCAAACAACATGGATAGGGCAGTCAAACTATACAAGAAGCTCAAAAGAGAAATAACGTTCCATGGGGC
CAAAGAGGTGTCACTAAGCTATTCAACTGGTGCACTTGCCAGTTGCATGGGCCTCATATATAACAGGATGGG
AACAGTAACCACAGAAGCTGCTTTTGGTCTAGTATGTGCCACTTGTGAACAGATTGCTGATTCACAGCATCG
GTCTCACAGACAAATGGTCACTACCACCAATCCACTAATCAGGCATGAAAACAGAATGGTGCTGGCTAGCAC
TACGGCAAAGGCTATGGAACAGATGGCTGGATCGAGTGAACAGGCAGCAGAGGCCATGGAGGTTGCTAATCA
GACTAGGCAGATGGTACATGCAATGAGGACTATTGGGACTCATCCTAGCTCCAGTGCTGGTCTGAAAGATGA
CCTTCTTGAAAATTTGCAGGCCTACCAGAAACGAATGGGAGTGCAGATGCAGCGATTCAAGTGATCCTCTCG
TCATTGCAGCAAATATCATTGGAATCTTGCACCTGATATTGTGGATTACAGATCGTCTTTTTTTCAAATGCA
TTTATCGTCGCTTTAAATACGGGTTGAAAAGAGGGCCTTCTACGGAAGGAGTGCCTGAGTCCATGAGGGAAG
AATATCAACAGGAACAGCAGAGTGCGGTGGATGTTGACGATGGTCATTTTGTCAACATAGAGCTAGAGTAA-
-------------------
>A/swine/Kansas/A01378037/2017/1-1025
--CAAAAGCAGGTAGATATTTAAAGATGAGTCTTCTAACCGAGGTCGAAACGTACGTTCTTTCTATCATCCC
GTCAGGCCCCCTCAAAGCCGAGATCGCGCAGAGACTGGAAAGTGTCTTTGCAGGAAAGAACACAGATCTTGA
GGCTCTCATGGAATGGCTAAAGACAAGACCAATCTTGTCACCCCTGACTAAGGGAATTTTAGGATTTGTGTT
CACGCTCACCGTGCCCAGTGAGCGAGGACTGCAGCGTAGACGCTTTGTCCAAAATGCCCTAAATGGGAATGG
GGACCCCAACAACATGGATAGAGCAGTTAAACTATACAAGAAGCTCAAAAGAGAAATAACGTTCCATGGGGC
TAAGGAGGTGTCACTAAGCTATTCAACTGGTGCACTTGCCAGTTGCATGGGCCTCATATACAACAGGATGGG
AACAGTGACCACAGAAGCTGCTTTTGGTCTAGTGTGTGCCACCTGTGAACAGATTGCTGATTCACAGCATCG
GTCTCACAGACAAATGGCTACAACCACCAATCCACTAATCAGGCATGAAAATAGAATGGTGCTGGCTAGCAC
TACTGCAAAGGCTATGGAACAGATGGCTGGATCGAGTGAGCAGGCGGCAGAGGCCATGGAGGTTGCTAATCA
GACTAGGCAGATGGTACATGCAATGAGAACTATTGGGACTCATCCTAGCTCCAGTGCTGGTCTGAAAGATGA
CCTTCTTGAAAATTTACAGGCCTATCAGAAGCGAATGGGAGTGCAAATGCAGCGATTCAAGTGATCCTCTCG
TCGTTGCAGCAAATATCATTGGGATCTTGCACTTGATATTGTGGATTACTGATCGTCTTTTTTTCAAATATA
TTTACCGTCGCTTTAAATACGGTTTGAAAAGAGGGCCTTCTACAGAAGGAGTGCCTGAGTCCATGAGGGAAG
AATATCAACAGGAACAGCAGAGTGCTGTGGATGTTGACGATGGTCATTTTGTCAACATAGAGCTAGAGTAAA
AAACTACCTTGTTTCTACT
>A/swine/Iowa/A02223241/2017/1-982
-------------------------ATGAGTCTTCTAACCGAGGTCGAAACGTACGTTCTTTCTATCATCCC
GTCAGGCTCCCTCAAAGCCGAGATCGCGCAGAGACTGGAAAGTGTTTTTTCAGGAAAGAACACAGATCTTGA
GGCTCTCATGGAATGGCTAAAGACAAGACCAATCTTGTCACCTCTGACCAAGGGGATTTTAGGATTTGTGTT
CACGCTCACCGTGCCCAGTGAGCGAGGACTGCAGCGTAGACGCTTTGTCCAAAATGCCCTAAATGGGAATGG
GGACCCGAACAACATGGATAGAGCAGTTAAACTATACAAGAAGCTCAAAAGAGAAATAACGTTCCATGGGGC
CAAGGAGGTGTCACTAAGCTATTCAACTGGTGCACTTGCCAGTTGCATGGGCCTCATATACAACAGGATGGG
AACAGTGACCACAGAAGCTGCTTTTGGTCTAGTGTGTGCCACTTGTGAGCAGATTGCTGATTCACAGCATCG
GTCTCACAGACAAATGGCTACTACCACCAATCCACTAATCAGACATGAAAACAGAATGGTGCTAGCTAGCAC
TACGGCAAAGGCTATGGAACAGATGGCTGGATCGAGTGAACAGGCAGCAGAGGCCATGGAGGTTGCTAATCA
AACTAGGCAGATGGTACATGCAATGAGAACTATTGGGACTCATCCTAGTTCCAGTGCTGGTCTGAAAGATGA
CCTTCTTGAAAATTTGCAGGCTTACCAGAAGCGGATGGGAGTGCAGATGCAGCGATTCAAATGACCCTCTCG
TCATTGCAGCAAATATCATTGGGATCTTGCACCTGATATTGTGGATTACTGATCGTCTTTTTTTCAAATGTA
TTTATCGTCGCTTTAAATACGGTTTGAAAAGAGGGCCTTCTACGGAAGGAGTGCCTGAGTCCATGAGGGAAG
AATATCAACAGGAACAGCAGAGTGCTGTGGATGTTGACGATAGTCATTTTGTCAACATAGAGCTAAAGTAA-
-------------------
>A/swine/North_Carolina/A02223469/2017/1-982
-------------------------ATGAGTCTTCTAACCGAGGTCGAAACGTACGTTCTTTCTATCATCCC
GTCAGGCTCCCTCAAAGCCGAGATCGCGCAGAGACTGGAAAATGTTTTTTCAGGAAAGAACACAGATCTTGA
GGCTCTCATGGAATGGCTAAAGACAAGACCAATCTTGTCACCTCTGACTAAGGGGATTTTAGGATTTGTGTT
CACGCTCACCGTGCCCAGTGAGCGAGGACTGCAGCGTAGACGCTTTGTCCAAAATGCCCTAAATGGGAATGG
GGACCCGAACAACATGGATAGAGCAGTTAAACTATACAAGAAGCTCAAAAGAGAAATAACGTTCCATGGGGC
CAAGGAGGTGTCACTAAGCTATTCAACTGGTGCACTTGCCAGTTGCATGGGCCTCATATACAACAGGATGGG
AACAGTGACCACAGAAGCTGCCTTTGGTCTGGTGTGCGCCACTTGTGAGCAGATTGCTGATTCACAGCATCG
GTCTCACAGACAAATGGCTACTACCACCAATCCACTAATCAGACATGAAAACAGAATGGTGCTGGCTAGCAC
TACGGCAAAGGCTATGGAACAAATGGCTGGATCGAGTGAACAGGCAGCAGAGGCCATGGAGGTTGCTAGCCA
AACTAGGCAGATGGTACATGCAATGAGAACTATTGGGACTCATCCTAGCTCCAGTGCTGGTCTGAAAGATGA
CCTTCTTGAAAATTTGCAGGCCTACCAGAAGCGAATGGGAGTGCAGATGCAGCGATTCAAGTGACCCTCTCG
TCATCGCAGCAAATATCATTGGGATCTTGCACCTGATATTGTGGATTACTGATCGTCTTTTTTTCAAATGTA
TTTATCGTCGCTTTAAATACGGTTTGAAAAGAGGGCCTTCTACGGAAGGAGTGCCTGAGTCCATGAGGGAAG
AATATCAACAGGAACAGCAGAGTGCTGTGGATGTTGACGATGGTCATTTTGTCAACATAGAGCTAGAGTAA-
-------------------
>A/swine/Iowa/A02223471/2017/1-982
-------------------------ATGAGTCTTCTAACCGAGGTCGAAACGTACGTTCTTTCTATCATACC
GTCAGGCCCCCTCAAAGCCGAGATCGCGCAGAGACTGGAAAGTGTCTTTGCAGGAAAGAACACGGATCTTGA
GGTTCTCATGGAATGGCTAAAGACAAGACCAATCTTGTCACCTCTGACTAAGGGAATTTTAGGATTTGTGTT
CACGCTCACCGTGCCCAGTGAGCGAGGACTGCAGCGTAGACGCTTTGTCCAAAATGCCCTGAATGGGAATGG
GGACCCAAACAACATGGATAGAGCAGTTAAACTATACAAGAAGCTCAAAAGAGAAATAACGTTCCATGGGGC
CAAGGAGGTGTCACTAAGCTATTCAACTGGTGCACTTGCCAGTTGCATGGGCCTCATATACAACAGGATGGG
AACAGTGACCACAGAAGCTGCTTTTGGTCTAGTGTGTGCCACTTGTGAACAGATTGCTGATTCACAGCATCG
GTCTCACAGACAAATGGCTACAACCACCAATCCACTAATCAGGCATGAGAACAGAATGGTTCTGGCTAGCAC
TACGGCAAAGGCTATGGAACAGATGGCTGGGTCGAGTGAACAGGCAGCGGAGGCCATGGAGGTTGCTAATCA
GACTAGGCAGATGGTACATGCAATGAGAACTATTGGAACTCATCCTAGCTCCAGTACTGGTCTGAAAGATGA
CCTTCTTGAAAATTTGCAGGCCTACCAGAAGCGAATGGGAGTGCAGATGCAGCGATTCAAGTGATCCTCTCG
CCATTGCAGCAAATATCATTGGGATCTTGCACCTGACATTGTGGATTACTGATCGTCTTTTTTTCAAATGTA
TTTATCGTCGCTTTAAATACGGTTTGAAAAGAGGGCCTTCTACGGAAGGAGTGCCTGAGTCCATGAGGGAAG
AATATCAACAGGAACAGCAGAGTGCTGTGGATGTTGACGATGGTCATTTTGTCAACATAGAGCTAGAGTAA-
-------------------
>A/swine/Pennsylvania/A02223370/2017/1-982
-------------------------ATGAGTCTTCTAACCGAGGTCGAAACGTACGTTCTGTCTATCATCCC
GTCAGGCCCCCTCAAAGCCGAGATTGCGCAGAGACTGGAAAGTGTCTTTGCAGGGAAGAACACAGATCTTGA
GGCCCTCATGGAATGGCTAAAGACAAGACCAATCTTGTCACCTCTGACTAAGGGAATTTTAGGATTTGTGTT
CACGCTCACCGTGCCCAGTGAGCGAGGACTGCAGCGTAGACGCTTTGTCCAAAATGCCCTGAATGGAAATGG
GGACCCAAACAACATGGATAGAGCAGTTAAACTATACAAGAAGCTCAAAAGAGAAATAACGTTCCATGGGGC
AAAGGAGGTGTCACTTAGCTATTCAACTGGTGCACTTGCCAGTTGCATGGGCCTCATATACAACAGGATGGG
AACAGTGACCACAGAAGCTGCTTTTGGTCTAGTGTGTGCCACTTGTGAACAGATTGCTGATTCACAGCATCG
GTCTCACAGACAGATGGCTACTACCACCAATCCACTAATTAGGCATGAGAACAGAATGGTGCTGGCTAGCAC
TACAGCAAAGGCTATGGAACAGATGGCTGGATCGAGTGAACAGGCAGCGGAGGCCATGGAGGTTGCTAATCA
GACTAGGCAGATGGTACATGCAATGAGAACTATTGGGACTCATCCTAGCTCCAGTACTGGTCTGAAAGATGA
CCTTCTTGAAAATTTGCAGGCCTACCAGAAGCGAATGGGAGTGCAGATGCAGCGATTCAAGTGATCCTCTCG
CCATTGCAGCCAATATCATTGGGATCTTGCACCTGATATTGTGGATTACTGATCGTCTTTTTTTCAAATGCA
TTTATCGTCGCTTTAAATACGGTTTGAAAAGAGGGCCTTCTACGGAAGGAGTGCCTGAGTCCATGAGGGAAG
AATATCAACAGGAACAGCAGAGTGCTGTGGATGTTGACGATGGTCATTTTGTCAACATAGAGCTAGAGTAA-
-------------------
>A/swine/Ohio/A02134225/2017/1-982
-------------------------ATGAGTCTTCTAACCGAGGTCGAAACGTACGTTCTTTCTATCATACC
GTCAGGCCCCCTCAAAGCCGAGATCGCACAGAGACTGGAAAGTGTCTTTGCAGGAAAAAACACAGATCTTGA
GGCTCTCATGGAGTGGCTAAAGACAAGACCAATCTTGTCACCTCTGACTAAGGGAATTTTAGGATTTGTGTT
CACGCTCACCGTGCCCAGTGAGCGAGGACTGCAGCGTAGACGCTTTGTCCAAAATGCCCTAAATGGGAATGG
GGACCCAAACAACATGGATAGAGCAGTTAAACTATACAAGAAGCTCAAAAGAGAAATAACGTTCCATGGGGC
CAAGGAGGTGTCACTAAGCTATTCAACTGGTGCACTTGCCAGTTGCATGGGCCTCATATACAACAGGATGGG
AACAGTGACCACAGAGGCTGCTTTTGGTCTAGTGTGTGCCACCTGTGAGCAGATTGCTGATTCACAGCATCG
GTCTCACAGACAAATGGCTACTACCACCAATCCACTAATCAGGCATGAGAACAGAATGGTGCTGGCTAGCAC
TACGGCAAAGGCTATGGAACAGATGGCTGGATCGAGTGAACAAGCAGCGGAGGCCATGGAGGTTGCTAATCA
GACTAGGCAGATGGTACATGCAATGAGAACTATTGGGACTCATCCTAGCTCCAGTACTGGTCTGAAAGATGA
CCTTCTTGAAAATTTACAGGCCTACCAGAAGCGAATGGGAGTGCAGATGCAGCGATTCAAGTGATCCTCTCG
CCATTGCAGCAAATATCATTGGGATCTTGCACCTGATATTGTGGATTACTGATCGTCTTTTTTTCAAATGTA
TTTATCGTCGCTTTAAATACGGTTTGAAAAGAGGGCCTTCTACGGAAGGGGTGCCTGAGTCCATGAGGGAAG
AATATCAACAGGAACAGCAGAGTGCTGTGGATGTTGACGATGGTCATTTTGTCAACATAGAGCTAGAGTAA-
-------------------
>A/swine/Indiana/A02134241/2017/1-982
-------------------------ATGAGTCTTCTAACCGAGGTCGAAACGTACGTTCTTTCTATCATCCC
GTCAGGCCCCCTCAAAGCCGAGATCGCGCAGAGACTGGAAAGTGTATTTGCAGGAAAGAACACAGATCTTGA
GGCTCTCATGGAATGGCTAAAGACAAGACCAATCTTGTCACCTCTGACTAAGGGAATTTTAGGATTTGTGTT
CACGCTCACCGTGCCCAGTGAGCGAGGACTGCAGCGTAGACGCTTTGTCCAAAATGCCCTGAATGGGAATGG
GGACCCGAACAACATGGATAGAGCAGTTAAACTATACAAGAAGCTCAAAAGAGAAATAACGTTCCATGGGGC
TAAGGAGGTGTCACTAAGCTATTCAACTGGTGCACTTGCCAGTTGCATGGGCCTCATATACAACAGGATGGG
AACAGTGACCACAGAAGCTGCTTTTGGTCTAGTGTGTGCCACTTGTGAGCAGATTGCTGATTCACAGCATCG
ATCTCACAGACAAATGGTTACTACCACCAATCCACTAATCAGGCATGAAAACAGAATGGTGCTGGCTAGCAC
TACTGCAAAGGCTATGGAACAGATGGCTGGATCGAGTGAACAGGCAGCAGAGGCCATGGAGGTTGCTAATCA
GACTAGGCAGATGGTACATGCAATGAGGACTATTGGGACTCATCCTAGCTCCAGTGCTGGTCTGAAGGATGA
CCTTCTTGAAAATTTACAGGCCTACCAGAAGCGAATGGGAGTGCAAATGCAGCGATTCAAGTGATCCTCTCG
TCATTGCAGCAAATATCATTGGGATCTTGCACCTGATATTGTGGATTACTGATCGTCTTTTTTTCAAATGTA
TTTATCGTCGCTTTAAATACGGTTTGAAAAGAGGGCCTCCTACAGAAGGAGTGCCTGAGTCCATGAGGGAAG
AATATCAACAGGAACAGCAGAGTGCTGTAGATGTTGACGATGGTCATTTTGTCAACATAGAGCTAGAGTAA-
-------------------
>A/swine/Iowa/A02134236/2017/1-982
-------------------------ATGAGTCTTCTAACCGAGGTCGAAACGTACGTTCTTTCTATCATCCC
GTCAGGCCCCCTCAAAGCCGAGATCGCGCAGAGACTGGAAAGTGTTTTTGCAGGAAAGAACACAGATCTTGA
GGCTCTCATGGAATGGCTAAAGACAAGACCAATCTTGTCACCTCTGACTAAGGGAATTTTAGGATTTGTGTT
CACGCTCACCGTGCCCAGTGAGCGAGGACTGCAGCGTAGACGCTTTGTTCAAAATGCCCTAAATGGGAATGG
GGACCCGAACAACATGGATAGAGCAGTTAAACTATACAAGAAGCTCAAAAGAGAAATAACGTTCCATGGGGC
AAAGGAGGTGTCACTAAGCTATTCGACTGGTGCACTTGCCAGTTGCATGGGCCTCATATATAACAGGATGGG
AACAGTGACCACAGAAGCTGCTTTTGGTCTAGTGTGTGCTACTTGTGAACAGATTGCTGACTCACAGCATAG
GTCTCACAGACAAATGGCTACTACCACCAATCCACTAATCAGGCATGAAAACAGAATGGTGCTGGCTAGCAC
TACTGCGAAGGCGATGGAACAGATGGCTGGATCGAGTGAACAGGCAGCAGAGGCCATGGAGGTTGCTAATCA
GACTAGGCAGATGGTACATGCAATGAGAACTATTGGGACTCATCCTAGCTCCAGTGCTGGTCTGAAAGATGA
TCTTCTTGAAAATTTACAGGCCTACCAGAAGCGAATGGGAGTGCAGATGCAGCGATTCAAGTGATCCTCTCG
TCATTGCAGCAAATATCATTGGGATCTTGCACCTGATATTGTGGATTGCTGATCGTCTTTTTTTCAAATGTA
TTTATCGTCGCTTTAAATACGGTTTGAAAAGAGGGCCTTCTACAGAAGGAGTGCCTGAGTCCATGAGGGAAG
AATACCAACAGGAACAGCAGAGTGCTGTGGATGTTGACGATGGTCATTTTGTCAACATAGAGCTAGAGTAA-
-------------------
>A/swine/Minnesota/A02223472/2017/1-982
-------------------------ATGAGTCTTCTAACCGAGGTCGAAACGTACGTTCTTTCTATCATCCC
ATCAGGCCCCCTCAAAGCCGAGATCGCGCAGAGACTGGAAAGTGTATTTGCAGGAAAGAACACAGATCTTGA
GGCTCTCATGGAATGGCTAAAGACAAGACCAATCTTGTCACCTCTGACTAAGGGAATTTTAGGATTTGTGTT
CACGCTCACCGTGCCCAGTGAGCGAGGACTGCAGCGTAGACGCTTTGTCCAAAATGCCCTAAATGGGAATGG
GGACCCGAACAACATGGATAGAGCAGTTAAACTATACAAGAAGCTCAAAAGAGAAATAACGTTCCATGGGGC
TAAGGAGGTGTCACTAAGCTATTCAACTGGTGCACTTGCCAGTTGCATGGGCCTCATATACAACAGGATGGG
AACAGTGACCACAGAAGCTGCTTTTGGTCTAGTGTGTGCCACTTGTGAACAGATTGCTGATTCACAGCATCG
ATCTCACAGACAAATGGTTGCTACCACCAATCCACTAATCAGGCATGAAAACAGAATGGTGCTGGCTAGCAC
TACTGCAAAGGCAATGGAACAGATGGCTGGATCGAGTGAACAGGCAGCAGAGGCCATGGAGGTTGCTAATCA
GACTAGGCAGATGGTACATGCAATGAGAACTATTGGGACTCATCCTAGCTCCAGTGCTGGTCTGAAGGATGA
CCTTCTTGAAAATTTACAGGCCTACCAGAAGCGAATGGGAGTGCAAATGCAGCGATTCAAGTGATCCTCTCG
TCATTGCAGCAAATATCATTGGAATCTTGCACCTGATATTGTGGATTACTGATCGTCTTTTTTTCAAATGTA
TTTATCGTCGCTTTAAATACGGTTTGAAAAGAGGGCCTCCTACAGAAGGAGTGCCTGAGTCCATGAGGGAAG
AATATCAACAGGAACAGCAGAGTGCTGTGGATGTTGACGATGGTCATTTTGTCAACATAGAGCTAGAGTAA-
-------------------
>A/swine/Iowa/A01678511/2017/1-982
-------------------------ATGAGTCTTCTAACCGAGGTCGAAACGTACGTTCTTTCTATCATCCC
GTCAGGCCCCCTCAAAGCCGAGATCGCGCAGAGACTGGAAAGTGTATTTGCAGGAAAGAACACAGATCTTGA
GGCTCTCATGGAATGGCTAAAGACAAGACCAATCTTGTCACCTCTGACTAAGGGAATTTTAGGATTTGTGTT
CACGCTCACCGTGCCCAGTGAGCGAGGACTGCAGCGTAGACGCTTTGTCCAAAATGCCCTAAATGGGAATGG
GGACCCGAACAACATGGATAGAGCAGTTAAACTATACAAGAAGCTCAAAAGAGAAATAACGTTCCATGGGGC
TAAGGAGGTGTCACTAAGCTATTCAACTGGTGCACTTGCCAGTTGCATGGGCCTCATATACAACAGGATGGG
AACAGTGACCACAGAAGCTGCTTTTGGTCTAGTGTGTGCCACCTGTGAACAGATTGCTGATTCACAGCATCG
ATCTCACAGACAAATGGTCACTACCACCAATCCACTAATCAGGCATGAAAACAGAATGGTGCTGGCTAGCAC
TACTGCAAAGGCTATGGAACAGATGGCTGGATCGAGTGAACAGGCAGCAGAGGCCATGGAGGTTGCTAATCA
GACTAGGCAGATGGTACATGCAATGAGAACTATTGGGACTCATCCTAGCTCCAGTGCTGGTCTGAAGGATGA
CCTTCTTGAAAATTTACAGGCCTACCAGAAGCGAATGGGAGTGCAAATGCAGCGATTCAAGTGATCCTCTCG
TCATTGCAGCAAATATCATTGGGATCTTGCACCTGATATTGTGGATTACTGATCGTCTTTTTTTCAAATGTA
TTTATCGTCGCTTTAAATACGGTTTGAAAAGAGGGCCTCCTACAGAAGGAGTGCCTGAGTCCATGAGGGAAG
AATATCAACAGGAACAGCAGAGTGCTGTGGATGTTGACGATGGTCATTTTGTCAACATAGAGCTAGAGTAA-
-------------------
>A/swine/Illinois/A02223243/2017/1-982
-------------------------ATGAGTCTTCTAACCGAGGTCGAAACGTACGTTCTTTCTATCATCCC
GTCAGGCCCCCTCAAAGCCGAGATCGCGCAGAGACTGGAAAGTGTATTTGCAGGAAAGAACACAGACCTTGA
GGCTCTCATGGAATGGTTAAAGACAAGACCAATCTTGTCACCTCTGACTAAGGGAATTTTAGGATTTGTGTT
CACGCTCACCGTGCCCAGTGAGCGAGGACTGCAGCGTAGACGCTTTGTCCAAAATGCCCTAAATGGGAATGG
GGACCCGAACAACATGGATAGAGCAGTTAAACTATACAAGAAGCTCAAAAGAGAAATAACGTTCCATGGGGC
TAAGGAGGTGTCACTGAGCTATTCAACTGGTGCACTTGCCAGTTGCATGGGCCTCATATACAACAGAATGGG
AACAGTGACCACAGAAGCTGCTTTTGGTCTAGTGTGTGCCACTTGTGAACAGATTGCTGATTCACAGCATCG
ATCTCACAGACAAATGGCTACTACCACCAATCCACTAATCAGGCATGAAAATAGAATGGTGCTGGCTAGCAC
TACTGCAAAGGCTATGGAACAGATGGCTGGATCGAGTGAACAGGCAGCAGAGGCCATGGAGGTTGCTAATCA
GACTAGGCAGATGGTACATGCAATGAGAACTATTGGGACTCATCCTAGCTCCAGTGCTGGTCTGAAGGATGA
CCTTCTTGAAAATTTACAGGCCTACCAGAAGCGAATGGGAGTGCAAATGCAGCGATTCAAGTGATCCTCTCG
TCATTGCAGCAAATATCATTGGGATCTTGCACCTGATATTGTGGATTACTGATCGTCTTTTTTTCAAATGTA
TTTATCGTCGCTTTAAATACGGTTTGAAAAGAGGGCCTTCTACAGAAGGAGTGCCTGAGTCCATGAGGGAAG
AATATCAACAGGAACAGCAGAATGCTGTGGATGTTGACGATGGTCATTTTGTCAACATAGAGCTAGAGTAA-
-------------------
>A/swine/South_Dakota/A01678510/2017/1-982
-------------------------ATGAGTCTTCTAACCGAGGTCGAAACGTACGTTCTTTCCATCATCCC
GTCAGGCCCCCTCAAAGCCGAGATCGCGCAGAGACTGGAGAGTGTCTTTGCAGGAAAGAACACAGATCTTGA
GGCTCTCATGGAATGGCTAAAGACAAGACCAATCTTGTCACCTTTGACTAAGGGAATTTTAGGGTTTGTGTT
CACGCTCACCGTGCCCAGTGAGCGAGGACTGCAACGTAGACGCTTTGTCCAAAATGCCCTAAATGGGAATGG
GGACCCAAACAACATGGATAGAGCAGTCAAACTATACAAGAAGCTCAAAAGAGAAATAACGTTCCATGGGGC
CAAAGAGGTGTCACTAAGCTATTCAACTGGTGCACTTGCCAGTTGCATGGGCCTCATATATAACAGGATGGG
AACAGTAACCACAGAAGCTGCTTTTGGTCTAGTATGTGCCACTTGTGAACAGATTGCTGATTCACAGCATCG
GTCTCACAGACAAATGGTTACTACCACCAATCCACTAATCAGGCATGAAAACAGAATGGTGCTGGCTAGCAC
TACGGCAAAGGCTATGGAACAGATGGCTGGATCGAGTGAACAGGCAGCAGAGGCCATGGAGGTTGCTAATCA
GACTAGGCAGATGGTACATGCAATGAGGACTATTGGGACTCATCCTAGCTCCAGTGCTGGTCTGAAAGATGA
CCTTCTTGAAAATTTGCAGGCCTACCAGAAACGAATGGGAGTGCAGATGCAGCGATTCAAGTGATCCTCTCG
TCATTGCAGCAAATATCATTGGGATCTTGCACCTGATATTGTGGATTACAGATCGTCTTTTTTTCAAATGCA
TTTATCGTCGCTTTAAATACGGGTTGAAAAGAGGGCCTTCTACGGAAGGAGTGCCTGAGTCCATGAGGGAAG
AATATCAACAGGAACAGCAGAGTGCGGTGGATGTTGACGATGGTCATTTTGTCAACATAGAGCTAGAGTAA-
-------------------
>A/swine/North_Carolina/A02223226/2017/1-982
-------------------------ATGAGTCTTCTAACCGAGGTCGAAACGTACGTTCTTTCTATCATCCC
GTCAGGCTCCCTCAAAGCCGAGATCGCGCAGAGACTGGAAAGTGTTTTTTCAGGAAAGAACACAGATCTTGA
GGCTCTCATGGAATGGCTAAAGACAAGACCAATCTTGTCACCTCTGACTAAGGGGATTTTAGGATTTGTGTT
CACGCTCACCGTGCCCAGCGAGCGAGGACTGCAGCGTAGACGCTTTGTCCAAAATGCCCTAAATGGGAATGG
GGACCCGAACAACATGGATAGAGCAGTTAAACTATACAAGAAGCTCAAAAGAGAAATAACGTTCCATGGGGC
CAAGGAGGTGTCACTAAGCTATTCAACTGGTGCACTTGCCAGTTGCATGGGCCTCATATACAACAGGATGGG
AACAGTGACCACAGAAGCTGCCTTTGGTCTGGTGTGTGCCACTTGTGAACAGATTGCTGATTCACAGCATCG
GTCTCACAGACAAATGGCTACTACCACCAACCCACTAATCAGACATGAAAACAGAATGGTGCTGGCTAGCAC
TACGGCAAAGGCTATGGAACAAATGGCTGGATCGAGTGAACAGGCAGCAGAGGCCATGGAGGTTGCTAATCA
AACTAGGCAGATGGTACATGCAATGAGAACTATTGGGACTCACCCTAGCTCCAGTGCTGGTCTGAAAGATGA
CCTTCTTGAAAATTTGCAGGCCTACCAGAAGCGAATGGGAGTGCAGATGCAGCGATTCAAGTGACCCTCTCG
TCATCGCAGCAAATATCATTGGGATCTTGCACCTGATATTGTGGATTACTGATCGTCTTTTTTTCAAATGTA
TTTATCGTCGCTTTAAATACGGTTTGAAAAGAGGGCCTTCTACGGAAGGAGTGCCTGAGTCCATGAGGGAAG
AATATCAACAGGAACAGCAGAGTGCTGTGGATGTTGACGATGGTCATTTTGTCAACATAGAGCTAGAGTAA-
-------------------
>A/swine/Iowa/A02135000/2017/1-982
-------------------------ATGAGTCTTCTAACCGAGGTCGAAACGTACGTTCTTTCTATCATACC
GTCAGGCCCCCTCAAAGCCGAGATTGCGCAGAGACTGGAAAGTGTCTTTGCAGGAAAGAATACAGACCTTGA
GGCTCTCATGGAATGGCTAAAGACAAGACCAATCTTGTCACCTTTGACTAAGGGAATTTTAGGATTTGTGTT
CACGCTCACCGTGCCCAGTGAGCGAGGACTGCAGCGTAGACGCTTTGTCCAAAATGCCCTGAATGGGAATGG
GGACCCAAACAACATGGACAGAGCAGTTAAACTATACAAGAAGCTCAAAAGAGAAATAACGTTCCATGGGGC
CAAGGAGGTGTCACTAAGCTATTCAACTGGTGCACTTGCCAGTTGCATGGGCCTCATATACAACAGGATGGG
AACAGTGACCACAGAAGCTGCTTTTGGTCTAGTGTGTGCCACTTGTGAACAGATTGCTGATTCACAGCATCG
GTCTCACAGACAGATGGCTACCACCACCAATCCACTAATCAGGCATGAGAACAGAATGGTGCTGGCTAGCAC
TACGGCAAAGGCTATGGAACAGATGGCTGGATCGAGTGAACAGGCAGCGGAGGCCATGGAGGTTGCTAATCA
GACTAGGCAGATGGTGCATGCAATGAGAACTATTGGGACTCATCCTAGTTCCAGTACTGGTCTGAAAGATGA
CCTTCTTGAAAATTTGCAGGCCTATCAGAAGCGAATGGGAGTGCAGATGCAGCGGTTTAAGTGATCCTCTCG
CCATTGCAGCAAATATCATTGGGATCTTGCACCTGATATTGTGGATTACTGATCGTCTTTTTTTCAAATGTA
TTTATCGTCGCTTTAAATACGGTTTGAAAAGAGGGCCTTCTACGGAAGGAGTGCCTGAGTCCATGAGGGAAG
AATATCAACAGGAACAGCAGAGTGCTGTGGATGTTGACGATGGTCATTTTGTCAACATAGAGCTGGAGTAA-
-------------------
>A/swine/Iowa/A02134994/2017/1-982
-------------------------ATGAGTCTTCTAACCGAGGTCGAAACGTACGTTCTTTCTATCATACC
GTCAGGCCCCCTCAAAGCCGAGATTGCGCAGAGACTGGAAAGTGTCTTTGCAGGAAAGAATACAGACCTTGA
GGCTCTCATGGAATGGCTAAAGACAAGACCAATCTTGTCACCTTTGACTAAGGGAATTTTAGGATTTGTGTT
CACGCTCACCGTGCCCAGTGAGCGAGGACTGCAGCGTAGACGCTTTGTCCAAAATGCCCTGAATGGGAATGG
GGACCCAAACAACATGGATAGAGCAGTTAAACTATACAAGAAGCTCAAAAGAGAAATAACGTTCCATGGGGC
CAAGGAGGTGTCACTAAGCTATTCAACTGGTGCACTTGCCAGTTGCATGGGCCTCATATACAACAGGATGGG
AACAGTGACCACAGAAGCTGCTTTTGGTCTAGTGTGTGCCACTTGTGAACAGATTGCTGATTCACAGCATCG
GTCTCACAGACAGATGGCTACAACCACCAATCCACTAATCAGGCATGAGAACAGAATGGTGCTGGCTAGCAC
TACGGCAAAGGCTATGGAACAGATGGCTGGATCAAGTGAACAGGCAGCGGAGGCCATGGAGATTGCTAATCA
GACTAGGCAGATGGTACATGCAATGAGAACTATTGGGACTCATCCTAGTTCCAGTACTGGTCTGAAAGATGA
CCTTCTTGAAAATTTGCAGGCCTATCAGAAACGAATGGGAGTGCAGATGCAGCGGTTTAAGTGATCCACTCG
CCATTGCAGCAAATATCATCGGGATCTTGCACCTGATACTGTGGATTACTGATCGTCTTTTTTTCAAATGTA
TTTATCGTCGCTTTAAATACGGTTTGAAAAGAGGGCCTTCTACGGAAGGAGTGCCTGAGTCCATGAGGGAGG
AATATCAACAGGAACAGCAGAGTGCTGTGGATGTTGACGATGGTCATTTTGTCAACATAGAGCTGGAGTAA-
-------------------
>A/swine/Colorado/A01785307/2017/1-982
-------------------------ATGAGTCTTCTAACCGAGGTCGAAACGTACGTTCTTTCTATCGTCCC
GTCAGGCCCCCTCAAAGCCGAGATCGCGCAGAGACTGGAAAGTGTCTTTGCAGGAAAGAACACAGATCTTGA
GGCTCTAATGGAATGGCTAAAGACAAGACCAATCTTGTCACCTCTGACTAAGGGAATTTTAGGGTTTGTGTT
CACGCTCACCGTGCCCAGTGAGCGAGGACTGCAGCGTAGACGCTTTGTCCAAAATGCCCTAAATGGGAATGG
GGACCCAAACAACATGGATAGAGCAGTTAAACTATACAAGAAGCTCAAAAGAGAAATAACGTTCCATGGGGC
CAAGGAGGTGTCGCTAAGCTATTCAACTGGTGCACTTGCCAGTTGCATGGGCCTCATATACAACAGGATGGG
AACAGTGACCACAGAGGCTGCTTTTGGCCTAGTGTGTGCCACTTGTGAACAGATTGCTGATTCACAGCATCG
GTCCCACAGACAAATGGCTACTACTACCAATCCATTAATCAGGCATGAAAACAGAATGGTTCTGGCTAGCAC
TACGGCAAAGGCGATGGAACAGATGGCTGGATCGAGTGAACAGGCAGCAGAGGCCATGGAGGTTGCTAATCA
GACTAGGCAGATGGTGCATGCAATGAGAACTATTGGGACTCATCCTAGTTCCAGTGCTGGTCTGAAGGATGA
CCTCCTTGAAAATTTGCAGGCCTACCAGAAGCGAATGGGAGTGCAGATGCAGCGATTCAAGTGATCCTCTCG
TCATTGCAGCAAATATCATTGGGATCTTGCACCTGATATTGTGGATTACTGATCGTCTTTTTTTCAAATGCA
TTTATCGTCGCTTTAAATACGGTTTGAAAAGAGGGCCTTCTACGGAAGGAGTGCCTGAGTCCATGAGGGAAG
AATATCAACAGGAACAGCAGAGTGCTGTGGATGTTGACGATGGTCATTTTGTCAACATAGAGCTAGAGTAA-
-------------------
>A/swine/North_Carolina/A02223299/2017/1-982
-------------------------ATGAGTCTTCTAACCGAGGTCGAAACGTACGTTCTTTCTATCATACC
GTCAGGCCCCCTCAAAGCCGAGATCGCGCAGAGACTGGAAAGTGTCTTTGCAGGAAAGAACACAGATCTTGA
AGCTCTCATGGAATGGCTAAAGACAAGACCAATCTTGTCACCTCTGACTAAGGGAATTTTAGGATTTGTATT
CACGCTCACCGTGCCCAGTGAGCGAGGACTGCAGCGTAGACGCTTTGTCCAAAATGCCCTGAATGGGAATGG
GGACCCAAACAACATGGATAGAGCAGTTAAACTATACAAGAAGCTCAAAAGAGAAATAACATTCCATGGGGC
CAAGGAGGTGTCACTAAGCTATTCAACTGGTGCACTTGCCAGTTGCATGGGCCTCATATACAACAGGATGGG
AACAGTGACCACAGAAGCTGCTTTTGGTCTAGTGTGTGCCACTTGTGAACAGATTGCTGATTCACAGCATCG
GTCTCACAGACAGATGGCTACAACCACCAATCCACTAATTAGGCATGAGAACAGAATGGTGCTGGCTAGCAC
CACGGCAAAGGCTATGGAACAGATGGCTGGATCGAGTGAACAGGCAGCGGAGGCCATGGAGGTTGCTAATCA
GACTAGGCAGATGGTACATGCAATGAGAACTATTGGGACTCACCCTAGCTCCAGTACTGGTCTGAAAGATGA
CCTTCTTGAAAATTTGCAGGCCTACCAGAAGCGAATGGGAGTGCAGATTCAGCGATTCAAGTGATCCTCTCG
CCATTGCAGCAAATATCATTGGGATCTTGCACCTGATATTGTGGATTGCTGATCGTCTTTTTTTCAAATGTA
TTTATCGTCGCTTTAAATACGGTTTGAAAAGAGGGCCTTCAACGGAAGGAGTGCCTGAGTCCATGAGGGAAG
AATACCAACAGGAACAGCAGAGTGCTGTGGATGTTGACGATGGTCATTTTGTCAACATAGAGCTAGAGTAA-
-------------------
>A/swine/Iowa/A02134229/2017/1-982
-------------------------ATGAGTCTTCTAACCGAGGTCGAAACGTACGTTCTTTCTATCATCCC
GTCAGGCTCCCTCAAAGCCGAGATCGCGCAGAGACTGGAAAGTGTTTTTTCAGGAAAGAACGCAGATCTTGA
GGCTCTCATGGAATGGCTAAAGACAAGACCAATCTTGTCACCTCTGACTAAGGGGATTTTAGGATTTGTGTT
CACGCTCACCGTGCCCAGTGAGCGAGGACTGCAGCGTAGACGCTTTGTCCAAAATGCCTTAAATGGGAATGG
GGACCCGAACAACATGGATAGAGCAGTTAAACTATACAAGAAGCTCAAAAGAGAAATAACGTTCCATGGGGC
CAAAGAGGTGTCACTAAGCTATTCAACTGGTGCACTTGCCAGTTGCATGGGCCTCATATACAACAGAATGGG
AACAGTGACCACAGAAGCTGCTTTTGGTCTAGTGTGTGCCACTTGTGAACAGATTGCTGATTCACAGCATCG
GTCTCACAGACAAATGGCTACTACCACCAATCCACTAATCAGGCATGAAAACAGAATGGTGCTGGCTAGCAC
TACTGCAAAGGCTATGGAACAGATGGCTGGATCGAGTGAACAGGCAGCAGAAGCCATGGAGGTTGCTAATCA
AACTAGGCAGATGGTACATGCAATGAGAACCATTGGGACTCATCCTAGCTCCAGTGCTGGTCTGAAAGATGA
CCTTCTTGAAAATTTGCAGGCCTACCAGAAGCGAATGGGAGTGCAGATGCAGCGATTCAAATGATCCTCTCG
TCATTGCAGCAAATATCATTGGGATCTTGCACCTGATATTGTGGATTACTGATCGTCTTTTCTTCAAATGTA
TTTATCGTCGCTTTAAATACGGTTTGAAAAGAGGGCCTTCTACGGAAGGAGTGCCTGAGTCCATGAGGGAAG
AATATCAACAGGAACAGCAGAGTGCTGTGGATGTTGACGATGGTCATTTTGTCAACATAGAGCTAGAGTAA-
-------------------
>A/swine/North_Carolina/A02223210/2017/1-982
-------------------------ATGAGTCTTCTGACCGAGGTCGAAACGTACGTTCTTTCTATCATCCC
GTCAGGCCCCCTCAAAGCCGAGATCGCGCAGAGACTGGAAAGTGTCTTTGCAGGAAAGAACACAGATCTTGA
GGCTCTCATGGAATGGCTAAAGACAAGACCAATCTTGTCACCTTTGACCAAGGGCATTTTGGGATTTGTGTT
CACGCTCACCGTGCCCAGTGAGCGAGGACTGCAGCGTAGACGCTTTGTCCAAAATGCCCTAAATGGGAATGG
GGACCCAAACAACATGGATAGAGCAGTTAAACTATACAAGAAGCTCAAAAGAGAAATAACGTTCCATGGGGC
CAAGGAGGTGTCATTAAGCTATTCAACTGGTGCACTTGCCAGTTGCATGGGCCTCATATACAACAGGATGGG
AACAGTAACCACAGAAGCTGCTTTTGGTTTAGTATGTGCCACTTGTGAACAGATAGCTGATTCACAGCATCG
GTCTCACAGACAAATGGCTACTACCACCAATCCACTAATCAGACATGAAAACAGAATGGTGCTGGCTAGCAC
TACGGCAAAGGCCATGGAACAAATGGCTGGATCGAGTGAACAGGCAGCAGAGGCCATGGAGGTTGCTAATCA
GACTAGGCAGATGGTACATGCAATGAGAACTATTGGGACTCATCCTAGCTCCAGTGCTGGTCTGAAAGATGA
CCTTCTTGAAAATTTGCAGGCATACCAGAAACGAATGGGAGTGCAAATGCAGCGATTCAAGTGATCCTCTCG
TTATCGCAGCAAATATCATTGGGATCTTGCACCTGATATTGTGGATTACAGATCGTCTTTTTTTCAAATGCA
TTTATCGTCGCTTTAGATACGGGTTGAAAAGAGGGCCTTCTACGGAAGGAGTGCCTGAGTCCATGAGGGAAG
AATATCAACAGGAACAGCAGAGTGCGGTGGATGTTGACGATGGTCATTTTGTCAACATAGAGCTAGAGTAA-
-------------------
>A/swine/South_Dakota/A02134997/2017/1-982
-------------------------ATGAGTCTTCTAACCGAGGTTGAAACGTACGTTCTTTCTATCATCCC
GTCAGGCCCCCTCAAAGCCGAGATCGCACAGAGACTGGAAAGTGTCTTTGCAGGAAAGAACACAGATCTTGA
GGCTCTCATGGAATGGCTAAAGACAAGACCAATCTTGTCACCTCTGACTAAGGGAATTTTAGGATTTGTGTT
CACGCTCACCGTGCCCAGTGAGCGAGGACTGCAGCGTAGACGCTTTATCCAAAATGCCCTAAATGGAAATGG
GGACCCGAACAACATGGATAGAGCAGTTAAACTATACAAGAAGCTCAAAAGAGAAATAACGTTCCACGGGGC
CAAGGAGGTGTCACTAAGCTATTCAACTGGTGCACTTGCCAGTTGCATGGGCCTCATATACAACAGGATGGG
AACAGTGACCACAGAAGCTGCTTTTGGTCTAGTTTGTGCCACTTGTGAACAGATTGCTGATTCACAGCATCG
GTCTCACAGACAAATGGCTACTACCACCAATCCACTAATCAGGCATGAAAACAGAATGGTGCTGGCTAGCAC
TACGGCAAAGGCTATGGAACAGGTGGCTGGATCGAGTGAACAGGCAGCAGAGGCCATGGAGGTTGCTAATAA
GACTAGGCAGATGGTACATGCAATGAGAACTATTGGGACTCATCCTAGCTCCAGTGCTGGTCTGAGAGATGA
CCTTCTTGAAAATTTGCAGGCCTACCAGAAGCGAATGGGAGTGCAGATGCAGCGGTTCAAGTGATCCTCTCG
TCATTGCAGCAAACATCATTGGGATCTTGCACCTGATATTGTGGATTACTGATCGTCTTTTTTTCAAATGCA
TTTATCGTCGCTTTAAATACGGTTTGAAAAGAGGGCCTTCTACGGAAGGAGTGCCTGAGTCCATGAGGGAAG
AATATCAACAGGAGCAGCAGAGTGCTGTGGATGTTGACGATGGTCATTTTGTCAACATAGAGCTAGAGTAA-
-------------------
>A/swine/Iowa/A02221488/2017/1-982
-------------------------ATGAGTCTTCTAACCGAGGTCGAAACGTACGTTCTTTCTATCATCCC
GTCAGGCCCCCTCAAAGCCGAGATCGCGCAGAGACTGGAAAGTGTCTTTGCAGGAAAGAACACAGATCTTGA
GGCTCTCATGGAATGGTTAAAGACAAGACCAATCTTGTCACCTCTGACTAAGGGAATTTTAGGATTTGTGTT
CACGCTCACCGTGCCCAGTGAGCGAGGACTGCAGCGTAGACGCTTTGTCCAAAATGCCCTAAATGGGAATGG
GGACCCGAACAACATGGATAGAGCAGTTAAATTATACAAGAAGCTCAAAAGAGAAATAACGTTCCATGGGGC
TAAGGAAGTGTCACTAAGCTATTCAACTGGTGCACTTGCCAGTTGCATGGGCCTCATATACAACAGGATGGG
AACAGTGACCACAGAAGCTGCTTTTGGTCTAGTGTGTGCCACTTGTGAACAGATTGCTGATTCACAGCATCG
GTCTCACAGACAAATGGCTACTACCACCAATCCACTAATTAGGCATGAAAACAGAATGGTGCTGGCTAGCAC
TACTGCAAAGGCTATGGAACAGATGGCTGGATCGAGTGAACAGGCAGCAGAGGCCATGGAGGTTGCTAATCA
GACTAGACAGATGGTACATGCAATGAGAACTATTGGGACTCATCCTAGCTCCAGTGCTGGTCTGAAAGATGA
CCTTCTTGAAAATTTACAGGCCTATCAGAAGCGAATGGGAGTGCAGATGCAGCGATTCAAGTGATCCTCTCG
CCATTGCCGCAAACATCATTGGGATCTTGCACCTGATATTGTGGATTACTGATCGTCTTTTTTTCAAATGTA
TTTATCGTCGCTTTAAATACGGTTTGAAAAGAGGGCCTTCTACAGAAGGAGTGCCTGAGTCCATGAGGGAAG
AATATCAGCAGGAACAGCAGAGTGCTGTGGATGTTGACGATGGTCATTTTGTCAACATAGAGCTAGAGTAA-
-------------------
>A/swine/Iowa/A02221865/2017/1-982
-------------------------ATGAGTCTTCTAACCGAGGTCGAAACGTACGTTCTTTCTATCATCCC
GTCAGGCTCCCTCAAAGCCGAGATCGCGCAGAGACTGGAAAGTGTTTTTTCAGGAAAGAACACAGATCTTGA
GGCTCTCATGGAATGGCTGAAGACAAGACCAATCTTGTCACCTCTGACTAAGGGGATTTTAGGATTTGTGTT
CACGCTCACCGTGCCCAGTGAGCGAGGACTGCAGCGTAGACGCTTTGTCCAAAATGCCCTAAATGGGAATGG
GGACCCGAACAACATGGATAGAGCAGTTAAACTATACAAGAAGCTCAAAAGAGAAATAACGTTCCATGGGGC
TAAAGAGGTGTCATTAAGCTATTCAACTGGTGCACTTGCCAGTTGTATGGGCCTCATATACAACAGGATGGG
AACAGTTACCACAGAAGCTGCTTTTGGTCTAGTGTGTGCCACTTGTGAACAGATTGCTGATTCACAGCATCG
GTCTCACAGACAGATGGCTACTACCACCAATCCACTAATAAGGCATGAAAACAGAATGGTGCTGGCTAGCAC
TACGGCAAAGGCTATGGAACAGATGGCTGGATCGAGTGAACAGGCAGCAGAGGCCATGGAGGTTGCTAACCA
AACTAGGCAGATGGTACATGCAATGAGAACTATTGGGACTCATCCTAGCTCCAGTGCTGGTCTGAAAGATGA
CCTTCTTGAAAATTTGCAGGCCTACCAGAAGCGGATGGGAGTGCAGATGCAGCGATTCAAATGATCCTTTCG
TCGTTGCAGCAAATATCATTGGGATCTTGCACCTGATATTGTGGATTGCTGATCGTCTTTTTTTCAAATGTA
TTTATCGTCGCTTTAAATACGGTTTGAAAAGAGGGCCTTCTACGGAAGGAGTGCCTGAGTCCATGAGGGAAG
AATATCAACAGGAACAGCAGAGTGCTGTGGATGTTGACGATGGTCATTTTGTCAACATAGAGCTAGAGTAA-
-------------------
>A/swine/Iowa/A02221872/2017/1-982
-------------------------ATGAGTCTTCTAACCGAGGTCGAAACGTACGTTCTTTCTATCATACC
GTCAGGCCCCCTCAAAGCCGAGATTGCGCAGAGACTGGAAAGTGTCTTTGCAGGAAAGAATACAGACCTTGA
GGCTCTCATGGAATGGCTAAAGACAAGACCAATCTTGTCACCTTTGACTAAGGGAATTTTAGGATTTGTGTT
CACGCTCACCGTGCCCAGTGAGCGAGGACTGCAGCGTAGACGCTTTGTCCAAAATGCCCTGAATGGGAATGG
GGACCCAAACAACATGGATAGAGCAGTTAAACTATACAAGAAGCTCAAAAGAGAAATAACGTTCCATGGGGC
CAAGGAGGTGTCACTAAGCTATTCAACTGGTGCACTTGCCAGTTGCATGGGCCTCATATACAACAGGATGGG
AACAGTGACCACAGAGGCTGCTTTTGGTCTAGTGTGTGCCACTTGTGAACAGATTGCTGATTCACAGCATCG
GTCTCACAGACAGATGGCTACAACCACCAATCCACTAATCAGGCATGAGAACAGAATGGTGCTGGCTAGCAC
TACGGCAAAGGCTATGGAACAGATGGCTGGATCAAGTGAACAGGCAGCGGAGGCCATGGAGGTTGCTAATCA
GACTAGGCAGATGGTACATGCAATGAGAACTATTGGGACTCATCCTAGTTCCAGTACTGGTCTGAAAGATGA
CCTTCTTGAAAATTTGCAGGCCTATCAGAAACGAATGGGAGTGCAGATGCAGCGGTTTAAGTGATCCACTCG
CCATTGCAGCAAATATCATTGGGATCTTGCACCTGATATTGTGGATTACTGATCGTCTTTTTTTCAAATGTA
TTTATCGTCGCTTTAAATACGGTTTGAAAAGAGGGCCTTCTACGGAAGGAGTGCCTGAGTCCATGAGGGAAG
AATATCAACAGGAACAGCAGAGTGCTGTGGATGTTGACGATGGTCATTTTGTCAACATAGAGCTGGAGTAA-
-------------------
>A/swine/Iowa/A02221870/2017/1-982
-------------------------ATGAGTCTTCTAACCGAGGTCGAAACGTACGTTCTTTCTATCATACC
GTCAGGCCCCCTCAAAGCCGAGATTGCGCAGAGACTGGAAAGTGTCTTTGCAGGAAAGAATACAGACCTTGA
GGCTCTCATGGAATGGCTAAAGACAAGACCAATCTTGTCACCTTTGACTAAGGGAATTTTAGGATTTGTGTT
CACGCTCACCGTGCCCAGTGAGCGAGGACTGCAGCGTAGACGCTTTGTCCAAAATGCCCTGAATGGGAATGG
GGACCCAAACAACATGGATAGAGCAGTTAAACTATACAAGAAGCTCAAAAGAGAAATAACGTTCCATGGGGC
CAAGGAGGTGTCACTAAGCTATTCAACTGGTGCACTTGCCAGTTGCATGGGCCTCATATACAACAGGATGGG
AACAGTGACCACAGAAGCTGCTTTTGGTCTAGTGTGTGCCACTTGTGAACAGATTGCTGATTCACAGCATCG
GTCTCACAGACAGATGGCTACAACCACCAATCCACTAATCAGGCATGAGAACAGAATGGTGCTGGCTAGCAC
TACGGCAAAGGCTATGGAACAGATGGCTGGATCAAGTGAACAGGCAGCGGAGGCCATGGAGATTGCTAATCA
GACTAGGCAGATGGTACATGCAATGAGAACTATTGGGACTCATCCTAGTTCCAGTACTGGTCTGAAAGATGA
CCTTCTTGAAAATTTGCAGGCCTATCAGAAACGAATGGGAGTGCAGATGCAGCGGTTTAAGTGATCCAATCG
CCATTGCAGCAAATATCATCGGGATCTTGCACCTGATATTGTGGATTACTGATCGTCTTTTTTTCAAATGTA
TTTATCGTCGCTTTAAATACGGTTTGAAAAGAGGGCCTTCTACGGAAGGAGTGCCTGAGTCCATGAGGGAAG
AATATCAACAGGAACAGCAGAGTGCTGTGGATGTTGACGATGGTCATTTTGTCAACATAGAGCTGGAGTAA-
-------------------
>A/swine/NorthCarolina/A02221365/2017/1-982
-------------------------ATGAGTCTTCTAACCGAGGTCGAAACGTACGTTCTTTCTATCATCCC
GTCAGGCTCCCTCAAAGCCGAGATCGCGCAGAGACTGGAAAGTGTTTTTTCAGGAAAGAACACAGATCTTGA
GGCTCTCATGGAATGGCTAAAGACAAGACCAATCTTGTCACCTCTGACTAAGGGGATTTTAGGATTTGTGTT
CACGCTCACCGTGCCCAGTGAGCGAGGACTGCAGCGTAGACGCTTTGTCCAAAATGCCCTAAATGGGAATGG
GGACCCGAACAACATGGATAGAGCAGTTAAACTATACAAGAAGCTCAAAAGAGAAATAACGTTCCATGGGGC
CAAGGAGGTGTCACTAAGCTATTCAACTGGTGCACTTGCCAGTTGCATGGGCCTCATATACAACAGGATGGG
AACAGTGACCACAGAAGCTGCCTTTGGTCTGGTGTGTGCCACTTGTGAACAGATTGCTGATTCACAGCATCG
GTCTCACAGACAAATGGCTACTACCACCAATCCACTAATCAGGCATGAAAACAGAATGGTGCTGGCTAGCAC
TACGGCAAAGGCTATGGAACAAATGGCTGGATCGAGTGAACAGGCAGCAGAGGCCATGGAGGTTGCTAATCA
AACTAGGCAGATGGTACATGCAATGAGAACTATTGGGACTCATCCTAGCTCCAGTGCTGGTCTGAAAGATGA
CCTTCTTGAAAATTTGCAGGCCTACCAGAAGCGAATGGGAGTGCAGATGCAGCGATTCAAGTGACCCTCTCG
TCATCGCAGCAAATATCATTGGGATCTTGCACCTGATATTGTGGATTACTGATCGTCTTTTTTTCAAATGTA
TTTATCGTCGCTTTAAATACGGTTTGAAAAGAGGGCCTTCTACGGAAGGAGTGCCTGAGTCCATGAGGGAAG
AATACCAACAGGAACAGCAGAATGCTGTGGATGTTGACGATGGTCATTTTGTCAACATAGAGCTAGAGTAA-
-------------------
>A/swine/NorthCarolina/A02221556/2017/1-982
-------------------------ATGAGTCTTCTAACCGAGGTCGAAACGTACGTTCTTTCTATCATACC
GTCAGGCCCCCTCAAAGCCGAGATTGCGCAGAGACTGGAAAGTGTCTTTGCAGGAAAGAACACAGATCTTGA
GGTTCTCATGGAATGGCTAAAGACAAGACCAATCTTGTCACCTCTGACTAAGGGAATTTTAGGATTTGTGTT
CACGCTCACCGTGCCCAGTGAGCGAGGACTGCAGCGTAGACGCTTTGTCCAAAATGCCCTGAATGGGAATGG
GGACCCAAACAACATGGATAGAGCAGTTAAACTATACAAGAAGCTCAAAAGAGAAATAACGTTCCATGGGGC
CAAGGAGGTGTCATTAAGCTATTCAACTGGTGCACTTGCCAGTTGCATGGGCCTCATATACAACAGGATGGG
AACAGTGACCACAGAAGCTGCTTTTGGTCTAGTGTGTGCCACTTGTGAACAGATTGCTGATTCACAGCATCG
GTCTCACAGACAAATGGCTACAACCACCAATCCACTAATCAGGCATGAGAACAGAATGGTGCTGGCTAGCAC
TACGGCAAAGGCTATGGAACAGATGGCTGGATCGAGCGAACAGGCAGCGGAGGCCATAGAGGTTGCCAATCA
GACTAGACAGATGGTACATGCAATGAGAACTATTGGGACTCATCCTAGCTCCAGTACTGGTCTGAAAGATGA
CCTTCTTGAAAATTTGCAGGCCTACCAGAAGCGAATGGGAGTGCAAATGCAGCGATTCAAGTGATCCTCTCG
CCATTGCAGCAAACATCATTGGGATCTTGCACCTGACATTGTGGATTACTGATCGTCTTTTTTTCAAATGTA
TTTATCGTCGCTTTAAATACGGTTTGAAAAGAGGGCCTTCTACGGAAGGAGTGCCTGAGTCCATGAGGGAAG
AATATCAACAGGAACAGCAGAGTGCTGTGGATGTTGACGATGGTCATTTTGTCAACATAGAGCTAAAGTAA-
-------------------
>A/swine/Oklahoma/A02221360/2017/1-982
-------------------------ATGAGTCTTCTAACCGAGGTCGAAACGTACGTTCTTTCTATCATACC
GTCAGGCCCCCTCAAAGCCGAGATTGCGCAGAGACTGGAAAGTGTCTTTGCAGGAAAGAATACAGACCTTGA
GGCTCTCATGGAATGGCTAAAGACAAGACCAATCTTGTCACCTTTGACTAAGGGAATTTTAGGATTTGTGTT
TACGCTCACCGTGCCCAGTGAGCGAGGACTGCAGCGTAGACGCTTTGTCCAAAATGCCCTGAATGGGAATGG
GGACCCAAACAACATGGATAGAGCAGTTAAACTATACAAGAAGCTCAAAAGAGAAATAACGTTCCATGGGGC
CAAGGAGGTGTCACTAAGCTATTCAACTGGTGCACTTGCCAGTTGCATGGGCCTCATATACAACAGGATGGG
AACAGTGACCACTGAAGCTGCTTTTGGTCTAGTGTGTGCCACTTGTGAACAAATTGCTGATTCACAGCATCG
GTCTCACAGACAGATGGCCACAACCACCAATCCACTAATCAGGCATGAGAACAGAATGGTGCTGGCTAGCAC
TACGGCAAAGGCTATGGAACAGATGGCTGGATCGAGTGAACAGGCAGCGGAGGCCATGGAGGTTGCTAATCA
GACTAGACAGATGGTACATGCAATGAGAACTATCGGGACTCATCCTAGTTCCAGTACTGGTCTGAAAGATGA
CCTTCTTGAAAATTTGCAGGCCTATCAGAAGCGAATGGGAGTGCAGATGCAGCGGTTTAAGTGATCCTCTCG
CCATTGCAGCTAATATCATTGGGATCTTGCACCTGATATTGTGGATTACTGATCGTCTTTTTTTCAAATGTA
TTTATCGTCGCTTTAAATACGGTTTGAAAAGAGGGCCTTCTACGGAAGGAGTGCCTGAGTCCATGAGGGAAG
AATATCAACAGGAACAGCAGAGTGCTGTGGATGTTGACGATGGTCATTTTGTCAACATAGAGCTGGAGTAA-
-------------------
>A/swine/Iowa/A02223025/2017/1-982
-------------------------ATGAGTCTTCTAACCGAGGTCGAAACGTACGTTCTCTCTATCATACC
GTCAGGCCCCCTCAAAGCCGAGATTGCGCAGAGACTGGAAAGTGTCTTTGCAGGAAAGAATACAGACCTTGA
GGCTCTCATGGAATGGCTAAAGACAAGACCAATCTTGTCACCTTTGACTAAGGGAATTTTAGGATTTGTGTT
CACGCTCACCGTGCCCAGTGAGCGAGGACTGCAGCGTAGACGCTTTGTCCAAAATGCCCTGAATGGGAATGG
GGACCCAAACAACATGGACAGAGCAGTCAAACTATACAAGAAGCTCAAAAGAGAAATAACGTTCCATGGGGC
CAAGGAGGTGTCACTAAGCTATTCAACTGGTGCACTTGCCAGTTGCATGGGCCTCATATACAACAGGATGGG
AACAGTGACCACAGAAGCTGCTTTTGGTCTAGTGTGTGCCACTTGTGAACAGATTGCTGATTCACAGCATCG
GTCTCACAGACAGATGGCTACCACCACCAATCCACTAATCAGGCATGAGAACAGAATGGTGCTGGCTAGCAC
TACGGCAAAGGCTATGGAACAGATGGCTGGATCGAGTGAACAGGCAGCGGAGGCCATGGAGGTTGCTAATCA
GACTAGGCAGATGGTGCATGCAATGAGAACTATTGGGACTCATCCTAGTTCCAGTACTGGTCTGAAAGATGA
CCTTCTTGAAAATTTGCAGGCCTATCAGAAGCGAATGGGAGTGCAGATGCAGCGGTTTAAGTGATCCTCTCG
CCATTGCAGCAAATATCATTGGGATCTTGCACCTGATATTGTGGATTACTGATCGTCTTTTTTTCAAATGTA
TTTATCGTCGCTTTAAATACGGTTTGAAAAGAGGGCCTTCTACGGAAGGAGTGCCTGAGTCCATGAGGGAAG
AATATCAACAGGAACAGCAGAGTGCTGTGGATGTTGACGATGGTCATTTTGTCAACATAGAGCTGGAGTAA-
-------------------
>A/swine/Iowa/A02221491/2017/1-982
-------------------------ATGAGTCTTCTAACCGAGGTCGAAACGTACGTTCTTTCTATCATACC
GTCAGGCCCCCTCAAAGCCGAGATCGCGCAGAGACTGGAAAGTGTCTTTGCAGGAAAGAATACAGACCTTGA
GGCTCTCATGGAATGGCTAAAGACAAGACCAATCTTGTCACCTTTGACTAAGGGAATTTTGGGATTTGTGTT
CACGCTCACCGTGCCCAGTGAGCGAGGACTGCAGCGTAGACGCTTTGTCCAAAATGCCCTGAATGGGAATGG
GGACCCAAACAACATGGATAGAGCAGTCAAACTATACAAGAAGCTCAAAAGAGAAATAACATTTCATGGGGC
CAAGGAGGTGTCACTAAGCTATTCAACTGGTGCACTTGCCAGTTGCATGGGCCTCATATACAACAGGATGGG
AACAGTGACCACAGAAGCTGCTTTTGGTCTAGTGTGTGCCACTTGTGAACAGATTGCTGATTCACAGCATCG
GTCTCACAGACAGATGGCTACAACCACCAATCCACTAATCAGGCATGAGAACAGAATGGTGCTGGCTAGCAC
TACGGCAAAGGCTATGGAACAGATGGCTGGATCGAGTGAACAGGCAGCGGAGGCCATGGAGGTTGCTAATCA
GACTAGGCAGATGGTACATGCAATGAGAACTATTGGGACTCATCCTAGTTCCAGTACTGGTCTGAAAGATGA
CCTTCTTGAAAATTTGCAGGCCTATCAGAAGCGAATGGGAGTGCAGATGCAGCGGTTTAAGTGATCCTCTCG
CCATTGCAGCAAATATCATTGGGATCTTGCACCTGATATTGTGGATTACTGATCGTCTTTTTTTCAAATGTA
TTTATCGTCGCTTTAAATACGGTTTGAAAAGAGGGCCTTCTACGGAAGGAGTGCCTGAGTCCATGAGGGAAG
AATATCAACAGGAACAGCAGAGTGCTGTGGATGTTGACGATGGTCATTTTGTCAACATAGAGCTGGAGTAA-
-------------------
>A/swine/Minnesota/A02221876/2017/1-982
-------------------------ATGAGTCTTCTAACCGAGGTCGAAACGTACGTTCTTTCTATCATCCC
GTCAGGCCCCCTCAAAGCCGAGATCGCGCAGAGACTGGAAAGTGTATTTGCAGGAAAGAACACAGATCTTGA
AGCTCTCATGGAATGGCTAAAGACAAGACCAATCTTGTCACCACTGACTAAGGGAATTTTAGGATTTGTGTT
CACGCTCACCGTGCCCAGTGAGCGAGGACTGCAGCGTAGACGCTTTGTCCAAAATGCCCTAAATGGGAATGG
GGACCCCAACAACATGGATAGAGCAGTTAAATTATACAAGAAGCTCAAAAGGGAAATAACGTTCCATGGGGC
TAAGGAGGTGTCACTAAGCTATTCAACTGGTGCGCTTGCCAGTTGCATGGGCCTCATATACAACAGGATGGG
AACAGTGACCACAGAAGCTGCTTTTGGTCTAGTGTGTGCCACTTGTGAACAGATTGCTGATTCACAGCATAG
ATCTCACAGACAAATGGCTACTACCACCAATCCACTAATCAGGCATGAAAACAGAATGGTGCTGGCTAGCAC
TACTGCAAAGGCTATGGAACAGATGGCTGGATCGAGTGAACAGGCAGCAGAGGCCATGGAGGTTGCTAATCA
GACTAGGCAGATGGTACATGCAATGAGAACTATTGGGACTCATCCTAGCTCCAGTACTGGTCTGAAGGATGA
CCTTCTTGAAAATTTACAGGCATACCAGAAGCGAATGGGAGTGCAAATGCAGCGATTCAAGTGATCCTCTCG
TCATTGCAGCAAATATCATTGGGATCTTGCACCTGATATTGTGGATTACTGATCGTCTTTTTTTCAAATGCA
TTTATCGTCGCTTTAAATACGGTTTGAAAAGAGGGCCTTCTACAGAAGGAGTGCCTGAGTCCATGAGGGAAG
AATATCAACAGGAACAGCAGAGTGCTGTGGATGTTGACGATGGTCATTTTGTCAACATAGAGCTAGAGTAA-
-------------------
>A/swine/Missouri/A02221494/2017/1-982
-------------------------ATGAGTCTTCTAACCGAGGTCGAAACGTACGTTCTTTCTATCATACC
GTCAGGCCCCCTCAAAGCCGAGATCGCGCAGAGACTGGAGAGTGTCTTTGCAGGAAAGAACACAGATCTTGA
GGCTCTCATGGAATGGCTAAAGACAAGACCAATCTTGTCACCTCTGACTAAGGGAATTTTGGGATTTGTGTT
CACGCTCACCGTGCCCAGTGAGCGAGGACTGCAGCGTAGACGCTTTGTCCAAAATGCCCTGAATGGGAATGG
AGACCCAAACAATATGGATAGAGCAGTTAAACTATACAAGAAGCTCAAAAGAGAAATAACATTCCATGGGGC
CAAGGAGGTGTCACTAAGCTATTCAACTGGTGCACTTGCCAGTTGCATGGGCCTCATATACAACAGGATGGG
AACAGTGACCACAGAAGCTGCTTTTGGTCTGGTGTGTGCCACTTGTGAACAGATTGCTGACTCACAGCATCG
GTCTCACAGACAGATGGCTACTACCACCAATCCACTAATCAGGCATGAGAACAGAATGGTGCTGGCTAGCAC
TACGGCAAAGGCTATGGAACAGATGGCTGGATCGAGTGAACAGGCAGCGGAGGCCATGGAGGTTGCTAATCA
GACTAGGCAGATGGTACATGCAATGAGAACTATTGGGACACATCCTAGCTCCAGTACTGGTCTGAAAGATGA
CCTTCTTGAAAATTTGCAGGCCTACCAGAAGCGAATGGGAGTGCAGATGCAGCGATTCAAGTGACCCTCTCG
CCATTGCAGCAAACATCATTGGGATCTTGCACCTGATATTGTGGATTACCGATCGTCTTTTTTTCAAATGTA
TTTATCGTCGCTTTAAATACGGTTTGAAAAGAGGGCCTTCAACGGAAGGAGTGCCTGAGTCCATGAGGGAAG
AATATCAACAGGAGCAGCAGAGTGCTGTGGATGTTGACGATGGTCATTTTGTCAACATAGAGCTAGAGTAA-
-------------------
>A/swine/Texas/A02221677/2017/1-982
-------------------------ATGAGTCTTCTAACCGAGGTCGAAACGTACGTTCTTTCTATCATCCC
ATCAGGCCCCCTCAAAGCCGAGATCGCGCAGAGACTGGAGAGTGTCTTTGCAGGAAAGAACACAGATCTTGA
GGCTCTCATGGAATGGCTAAAGACAAGACCAATCTTGTCACCTTTGACTAAGGGAATTTTAGGATTTGTGTT
CACGCTCACCGTGCCCAGTGAGCGAGGACTGCAGCGTAGACGCTTTGTCCAAAATGCCCTAAATGGGAATGG
GGACCCGAACAACATGGATAGAGCAGTCAAACTATACAAGAAGCTCAAAAGAGAAATAACGTTCCATGGGGC
CAAGGAGGTGTCACTAAGCTATTCAACTGGTGCACTTGCCAGTTGCATGGGTCTCATATATAACAGAATGGG
GACAGTGACCACAGAAGCTGCTTTTGGTCTAGTATGTGCCACTTGTGAACAGATTGCTGATTCACAGCATCG
GTCTCACAGACAAATGGCCACCACCACCAATCCACTAATCAGGCATGAAAACAGAATGGTGCTGGCTAGCAC
TACGGCAAAGGCTATGGAACAGATGGCTGGATCGAGTGAACAGGCAGCAGAGGCCATGGAGGTTGCTAATCA
GACTAGGCAGATGGTACATGCAATGAGGACTATTGGGACTCATCCTAGCTCCAGTGCTGGTCTGAAAGATGA
CCTTCTTGAAAATTTGCAGGCCTACCAGAAACGAATGGGAGTGCAGATGCAGCGATTCAAGTGATCCTCTCG
CCATTGCAGCAAATATCATTGGAATATTGCACCTGATATTGTGGATTACAGATCGTCTTTTTTTCAAATGCA
TTTATCGTCGCTTTAAATACGGGTTGAAAAGAGGGCCTTCTACGGAAGGAGTGCCTGAGTCCATGAGGGAAG
AATATCAACAGGAACAGCAGAGTGCGGTGGATGTTGACGATGGTCATTTTGTCAACATAGAGCTAGAGTAA-
-------------------
>A/swine/Iowa/A02138536/2017/1-982
-------------------------ATGAGTCTTCTAACCGAGGTCGAAACGTACGTTCTTTCTATCATACC
GTCAGGCCCCCTCAAAGCCGAGATTGCGCAGAGACTGGAAAGTGTCTTTGCAGGAAAGAATACAGACCTTGA
GGCTCTCATGGAATGGCTAAAGACAAGACCAATCTTGTCACCTTTGACTAAGGGAATTTTAGGATTTGTGTT
CACGCTCACCGTGCCCAGTGAGCGAGGACTGCAGCGTAGACGCTTTGTCCAAAATGCCCTGAATGGGAATGG
GGACCCAAACAACATGGATAGAGCAGTTAAACTATACAAGAAGCTCAAAAGAGAAATAACGTTCCATGGGGC
CAAGGAGGTGTCACTAAGCTATTCAACTGGTGCACTTGCCAGTTGCATGGGCCTCATATACAACAGGATGGG
AACAGTGACCACAGAAGCTGCTTTTGGTCTAGTGTGTGCCACTTGTGAACAGATTGCTGATTCACAGCATCG
GTCTCACAGACAGATGGCTACAACCACCAATCCACTAATCAGGCATGAGAACAGAATGGTGCTGGCTAGCAC
TACGGCAAAGGCTATGGAACAGATGGCTGGATCAAGTGAACAGGCAGCGGAGGCCATGGAGGTTGCTAATCA
GACTAGGCAGATGGTACATGCAATGAGAACTATTGGGACTCATCCTAGTTCCAGTACTGGTCTGAAAGATGA
CCTTCTTGAAAATTTGCAGGCCTATCAGAAACGAATGGGAGTGCAGATGCAGCGGTTTAAGTGATCCACTCG
CCATTGCAGCAAATATCATTGGGATCTTGCACCTGATATTGTGGACTACTGATCGTCTTTTTTTCAAATGTA
TTTATCGTCGCTTTAAATACGGTTTGAAAAGAGGGCCTTCTACGGAAGGAGTGCCTGAGTCCATGAGGGAAG
AATATCAACAGGAACAGCAGAGTGCTGTGGATGTTGACGATGGTCATTTTGTCAACATAGAGCTGGAGTAA-
-------------------
>A/swine/Texas/A02221802/2017/1-982
-------------------------ATGAGTCTTCTAACCGAGGTCGAAACGTACGTTCTTTCTATCATCCC
GTCAGGCCCCCTCAAAGCCGAGATCGCGCAGAGACTGGAAAGTGTATTTGCAGGAAAGAACACAGATCTTGA
GGCTCTCATGGAATGGCTAAAGACAAGACCAATCTTGTCACCTCTGACTAAGGGAATTTTAGGATTTGTGTT
CACGCTCACCGTGCCCAGTGAGCGAGGACTGCAGCGTAGACGTTTTGTCCAAAATGCCCTAAATGGGAATGG
GGACCCGAACAACATGGATAGAGCAGTTAAACTATACAAGAAGCTCAAAAGAGAAATAACGTTCCATGGGGC
TAAAGAGGTGTCACTAAGCTATTCAACTGGTGCACTTGCCAGTTGCCTGGGCCTCATATACAACAGGATGGG
AACAGTGACCACAGAAGCTGCTTTTGGTCTAGTGTGTGCCACTTGTGAACAGATTGCTGATTCACAGCATCG
ATCTCACAGACAAATGGTTGCTACCACCAATCCACTAATCAGGCATGAAAACAGAATGGTGCTGGCTAGCAC
TACTGCAAAGGCTATGGAACAGATGGCTGGATCGAGTGAACAGGCAGCAGAGGCCATGGAGGTTGCTAATCA
GACTAGGCAGATGGTACATGCAATGAGGACTATTGGGACTCATCCTAGCTCCAGTGCTGGTCTGAAGGATGA
CCTTCTTGAAAATTTACAGGCCTACCAGAAGCGAATGGGAGTGCAAATGCAGCGATTCAAGTGATCCTCTCG
TCATTGCAGCAAATATCATTGGGATCTTGCACCTGATATTGTGGATTACTGATCGTCTTTTTTTCAAATGTA
TTTATCGTCGCTTTAAATACGGTTTGAAAAGAGGGCCTCCTACAGAAGGAGTGCCTGAGTCCATGAGGGAAG
AATATCAACAGGAACAGCAGAGTGCTGTAGATGTTGACGATGGTCATTTTGTCAACATAGAGCTAGAGTAA-
-------------------
>A/swine/Iowa/A02221871/2017/1-982
-------------------------ATGAGTCTTCTAACCGAGGTCGAAACGTACGTTCTTTCTATCATCCC
ATCAGGCTCCCTCAAAGCCGAGATCGCGCAGAGACTGGAAAGTGTTTTTTCAGGAAAGAACACAGATCTTGA
GGTTCTCATGGAATGGCTAAAGACAAGACCAATCTTGTCACCTCTGACTAAGGGGATTTTAGGATTTGTGTT
CACGCTCACCGTGCCCAGTGAGCGAGGACTGCAGCGTAGACGCTTTGTCCAAAATGCCCTAAATGGGAATGG
GGACCCGAACAACATGGATAGAGCAGTTAAACTATACAAGAAGCTCAAAAGAGAAATAACGTTCCATGGGGC
CAAGGAGGTGTCACTAAGCTATTCAACTGGTGCACTTGCCAGTTGCATGGGCCTCATATACAACAGGATGGG
AACAGTGACCACAGAAGCTGCTTTTGGTCTAGTGTGTGCCACTTGTGAACAGATTGCTGACTCACAGCATCG
GTCTCACAGACAAATGGCTACTACCACCAATCCACTAATCAGGCATGAAAACAGAATGGTGCTGGCTAGCAC
TACGGCAAAGGCTATGGAACAGATGGCTGGATCGAGTGAACAGGCAGCAGAGGCCATGGAGGTTGCTAATCA
AACTAGGCAGATGGTACATGCAATGAGAACTATTGGGACTCATCCTAGCTCCAGTGCTGGTCTGAAAGATGA
CCTTCTTGAAAATTTGCAGGCCTACCAGAAGCGAATGGGAGTGCAGATGCAGCGATTCAAATGATCCTCTCG
TCATTGCAGCAAATATCATTGGGATCTTGCACCTGATATTGTGGATTACTGATCGTCTTTTTTTCAAATGTA
TTTATCGTCGCTTTAAATACGGTTTGAAAAGAGGGCCTTCTACGGAAGGAGTGCCTGAGTCCATGAGGGAAG
AATATCAACAGGAACAGCAGAGTGCTGTGGATGTTGACGATGGTCATTTTGTCAACATAGAGCTAGAGTAA-
-------------------
>A/swine/Illinois/A02221737/2017/1-982
-------------------------ATGAGTCTTCTAACCGAGGTCGAAACGTACGTTCTTTCTATCATACC
GTCAGGCCCCCTCAAAGCCGAGATTGCGCAGAGACTGGAAAGTGTCTTTGCAGGAAAGAATACAGACCTTGA
GGCTCTCATGGAATGGCTAAAGACAAGACCAATCTTGTCACCTTTGACTAAGGGAATTTTAGGATTTGTGTT
CACGCTCACCGTGCCCAGTGAGCGAGGACTGCAGCGTAGACGCTTTGTCCAAAACGCCCTGAATGGGAATGG
GGACCCAAACAACATGGATAGAGCAGTTAAACTATACAAGAAACTCAAAAGAGAAATAACGTTCCATGGGGC
CAAGGAGGTGTCACTAAGCTATTCAACTGGTGCACTTGCCAGTTGCATGGGCCTCATATACAACAGGATGGG
AACAGTGACCACAGAAGCTGCTTTTGGTCTAGTGTGTGCCACTTGTGAACAGATTGCTGATTCACAGCATCG
GTCTCACAGACAGATGGCTACAACCACCAATCCACTAATCAGGCATGAGAACAGAATGGTGCTGGCTAGCAC
TACGGCAAAGGCTATGGAACAGATGGCTGGATCGAGCGAACAGGCAGCGGAGGCCATGGAGGTTGCTAATCA
GACTAGGCAGATGGTACATGCAATGAGAACTATTGGGACTCATCCCAGTTCCAGTACTGGTCTGAAAGATGA
CCTTCTTGAAAATTTGCAGGCCTATCAGAAGCGAATGGGAGTGCAGATGCAGCGGTTTAAGTGATCCTCTCG
CCATTGCAGCAAATATCATTGGGATCTTGCACCTGATATTGTGGATTACTGATCGTCTTTTTTTCAAATGTA
TTTATCGTCGCTTTAAATACGGTTTGAAAAGAGGGCCTTCTACGGAAGGAGTGCCTGAGTCCATGAGGGAAG
AATATCAACAGGAACAGCAGAGTGCTGTGGATGTTGACGATGGTCATTTTGTCAACATAGAGCTGGAGTAA-
-------------------
>A/swine/Texas/A01785299/2017/1-982
-------------------------ATGAGTCTTCTAACCGAGGTCGAAACGTACGTTCTTTCTATCATCCC
GTCAGGCCCCCTCAAAGCCGAGATCGCGCAGAGACTGGAAAGTGTCTTTGCAGGAAAAAACACAGATCTTGA
GGCTCTCATGGAATGGCTAAAGACAAGACCAATCTTGTCACCTCTGACTAAGGGAATTTTAGGATTTGTGTT
CACGCTCACCGTGCCCAGTGAGCGAGGACTGCAGCGTAGACGCTTTGTCCAAAATGCCCTAAATGGGAATGG
GGACCCGAACAACATGGATAGAGCAGTTAAACTATACAAGAAGCTCAAAAGAGAAATAACGTTCCATGGGGC
CAAGGAGGTGTCGCTAAGCTATTCAACTGGTGCACTTGCCAGTTGCATGGGCCTCATATACAACAGAATGGG
AACAGTGACCACAGAAGCTGCTTTTGGCCTAGTGTGTGCCACTTGTGAACAGATTGCTGATTCACAGCATCG
GTCCCACAGACAAATGGCTACTACTACCAATCCATTAATCAGGCATGAAAATAGAATGGTTCTGGCTAGCAC
TACGGCAAAGGCTATGGAACAGATGGCTGGATCAAGTGAACAGGCAGCAGAGGCCATGGATGTTGCTAACCA
GACTAGGCAGATGGTGAATGCAATGAGAACTATTGGGACTCATCCTAGTTCCAGTGCTGGTCTGAAAGATGA
CCTCCTTGAAAATTTGCAGGCCTACCAGAAGCGAATGGGAGTGCAGATGCAGCGATTCAAGTGATCCTCTCG
TCATTGCAGCAAATATCATTGGAATCTTGCACCTGATATTGTGGATTGCTGATCGTCTTTTTTTCAAATGCA
TTTATCGTCGCTTTAAATACGGTTTGAAAAGAGGGCCTTCTACGGAAGGAGTGCCCGAGTCCATGAGGGAAG
AATATCAACAGGAACAGCAGAGTGCTGTGGATGTTGACGATGGTCATTTTGTCAACATAGAGCTAGAGTAA-
-------------------
>A/swine/Ohio/A02221519/2017/1-982
-------------------------ATGAGTCTTCTGACCGAGGTCGAAACGTACGTTCTTTCTATCATCCC
GTCAGGCCCCCTCAAAGCCGAAATCGCACAGAGACTGGAAAGTGTCTTTGCAGGAAAGAACACAGATCTTGA
GGCCCTCATGGAATGGCTAAAGACAAGACCAATCTTGTCACCTCTGACTAAGGGGATTTTAGGATTTGTGTT
CACGCTCACCGTGCCCAGTGAGCGAGGACTGCAGCGTAGACGCTTTGTCCAAAATGCCCTAAATGGAAATGG
GGACCCGAACAACATGGATAGAGCAGTTAAGCTATACAAGAAGCTCAAAAGAGAAATAACATTCCATGGGGC
AAAGGAGGTGTCACTAAGCTATTCAACTGGTGCACTTGCCAGTTGCATGGGCCTCATATACAACAGGATGGG
AACAGTAACCACAGAAGCTGCTTTTGGTCTAGTGTGTGCCACTTGTGAACAGATTGCTGATTCACAGCATCG
GTCTCACAGACAAATGGCTACTACCACCAATCCACTGATCAGGCATGAAAACAGGATGGTGCTGGCTAGCAC
TACGGCAAAGGCTATGGAACAGATGGCTGGATCGAGTGAGCAGGCAGCAGAGGCCATGGAGGTTGCTAATAA
GACTAGACAGATGGTACATGCAATGAGAACTATTGGGACTCATCCTAGCTCCAGTGCTGGTCTGAAAGATGA
TCTTCTTGAAAATTTGCAGGCCTACCAGAAGCGAATGGGAGTGCAAATGCAGCGATTCAAATGATCCTCTCG
TCATTGCAGCAAATATCATTGGGATCTTGCACCTGATATTGTGGATTTCTGATCGTCTTTTTTTCAAATGTG
TTTATCGTCACTTTAAATACGGTTTGAAAAGAGGGCCTTCTACAGAAGGAGTGCCTGAGTCCATGAGGGAAG
AATATCAACAGGAACAGCAGAGTTCTGTGGATGTTGACGATGGTCATTTTGTCAACATAGAGCTAGAGTAA-
-------------------
>A/swine/Missouri/A02200041/2018/1-982
-------------------------ATGAGTCTTCTGACCGAGGTCGAAACGTACGTTCTTTCTATCATCCC
GTCAGGCCCCCTCAAAGCCGAGATCGCACAGAGACTGGAAAGTGTCTTTGCAGGAAAGAACACAGATCTTGA
GGCCCTCATGGAATGGCTAAAGACAAGACCAATCTTGTCACCTCTGACTAAGGGGATTTTGGGATTTGTGTT
CACGCTCACCGTGCCCAGTGAGCGAGGACTGCAGCGTAGACGCTTTGTCCAAAATGCCCTAAATGGAAATGG
GGACCCGAACAACATGGATAGAGCAGTTAAGCTATACAAGAAGCTCAAAAGAGAAATAACATTCCATGGGGC
CAAGGAGGTGTCACTAAGCTATTCAACTGGTGCACTTGCCAGTTGCATGGGCCTCATATACAACAGGATGGG
AACAGTAACCACAGAAGCTGCTTTCGGTATAGTGTGTGCCACTTGTGAACAGATTGCTGATTCACAGCATCG
GTCTCACAGACAAATGGCTACTACCACCAATCCACTGATCAGGCATGAAAACAGGATGGTGCTGGCTAGCAC
CACGGCAAAGGCTATGGAACAGATGGCTGGATCGAGTGAGCAGGCAGCAGAGGCCATGGAGGTTGCTAATAA
GACTAGGCAGATGGTACATGCAATGAGAACTATTGGGACTCATCCTAGCTCCAGTGCTGGTCTGAAAGATGA
TCTTCTTGAAAATTTGCAGGCCTACCAGAAGCGAATGGGAGTGCAAATGCAGCGATTCAAATGATCCTCTCG
TCATTGCAGCAAATATCATTGGGATCTTGCACCTGATATTGTGGATTTCTGATCGTCTTTTTTTCAAATGTG
TTTATCGTCACTTTAAATACGGTTTGAAAAGAGGGCCTTCTACAGAAGGAGTGCCTGAGTCTATGAGGGAAG
AATATCAACAGGAACAGCAGAGTTCTGTGGATGTTGACGATGGTCATTTTGTCAACATAGAGCTAGAGTAA-
-------------------
>A/swine/Minnesota/A01785306/2017/1-982
-------------------------ATGAGTCTTCTAACCGAGGTCGAAACGTACGTTCTTTCTATCATCCC
GTCAGGCCCCCTCAAAGCCGAGATCGCGCAGAGACTGGAAAGTGTCTTTGCAGGAAAGAACACAGATCTTGA
GGCTCTCATGGAATGGCTAAAAACAAGACCAATCTTGTCACCCCTGACTAAGGGAATTTTAGGATTTGTGTT
CACGCTCACCGTGCCCAGTGAGCGAGGACTGCAGCGTAGACGCTTTGTCCAAAATGCCCTAAATGGGAATGG
GGACCCGAACAACATGGATAGAGCAGTTAAACTATACAAGAAACTCAAAAGAGAAATAACGTTCCATGGGGC
CAAGGAGGTGTCACTAAGCTATTCAACTGGTGCACTTGCCAGTTGCATGGGCCTCATATACAACAGAATGGG
AACAGTGACCACAGAAGCTGCTTTTGGTTTAGTGTGTGCCACTTGTGAACAGATTGCTGATTCACAGCATCG
GTCTCACAGACAAATGGCTACAACCACCAATCCACTAATCAGACATGAAAACAGAATGGTGCTGGCTAGCAC
TACGGCAAAGGCTATGGAACAGATGGCTGGATCGAGTGAACAGGCAGCAGAGGCCATGGAGGTTGCCAATAA
GACTAGGCAGATGGTGCATGCAATGAGAACAATTGGGACTCATCCTAGTTCTAGTGCTGGTCTGAAAGATGA
CCTTCTTGAAAATTTGCAGGCCTACCAGAAGCGAATGGGAGTGCAGATGCAGCGATTCAAGTGATCCTCTCG
TCATTGCAGCGAATATCATTGGGATCTTGCACCTGATATTGTGGATTACTGATCGTCTTTTTTTCAAATGTG
TTTATCGTCACTTTAAATACGGGTTGAAAAGAGGGCCTTCTACGGAAGGAGTGCCTGAGTCCATGAGGGAAG
AATATCAACAGGAACAGCAGAGTGCTGTGGATGTTGACGATGGTCATTTTGTCAACATAGAGCTAGAGTAA-
-------------------
>A/swine/Ohio/OH_17_25445/2017/1-982
-------------------------ATGAGTCTTCTAACCGAGGTCGAAACGTACGTTCTCTCTATCATACC
GTCAGGCCCCCTCAAAGCCGAGATTGCGCAGAGACTGGAAAGTGTCTTTGCAGGAAAGAACACAGATCTTGA
GGCTCTCATGGAATGGCTAAAGACAAGACCAATCTTGTCACCTCTGACTAAGGGAATTTTAGGATTTGTGTT
CACGCTCACCGTGCCCAGTGAGCGAGGACTGCAGCGTAGACGCTTTGTCCAAAATGCCCTGAATGGGAATGG
GGACCCAAACAATATGGATAGAGCAGTTAAACTATACAAGAAGCTCAAAAGAGAAATAACGTTCCATGGGGC
CAAGGAGGTGTCACTAAGCTATTCAACTGGTGCACTTGCCAGTTGCATGGGCCTCATATACAACAGGATGGG
AACAGTGACCACAGAAGCTGCTTTTGGTCTAGTGTGTGCCACTTGTGAACAGATTGCTGATTCACAGCATCG
GTCTCACAGACAGATGGCTACAACCACCAATCCACTAATCAGGCATGAGAACAGAATGGTGCTGGCTAGCAC
TACTGCAAAGGCTATGGAACAGATGGCTGGATCGAGTGAACAGGCAGCGGAGGCCATGGAGGTTGCTAATCA
GACTAGGCAGATGGTACATGCAATGAGAACTATTGGGACTCATCCTAGCTCCAGTACTGGTCTGAAAGATGA
CCTTCTTGAAAATTTGCAGGCATACCAGAAGCGAATGGGAGTGCAGATGCAGCGATTCAAGTGATCCTCTCT
CCATTGCAGCAAATATCATTGGGATCTTGCACCTGATATTGTGGATTACTGATCGTCTTTTTTTCAAATGTA
TTTATCGTCGCTTTAAATACGGTTTGAAAAGAGGGCCTTCTACGGAAGGAGTGCCAGAGTCTATGAGGGAAG
AATATCAACAGGAACAGCAGAGTGCTGTGGATGTTGACGATGGTCATTTTGTCAACATAGAGCTAGAGTAA-
-------------------
>A/swine/Ohio/OH_17_26330/2017/1-982
-------------------------ATGAGTCTTCTGACCGAGGTCGAAACGTACGTTCTTTCTATCATCCC
GTCAGGCCCCCTCAAAGCCGAAATCGCACAGAGACTGGAAAGTGTCTTTGCAGGAAAGAACACAGATCTTGA
GGCCCTCATGGAATGGCTAAAGACAAGACCAATCTTGTCACCTCTGACTAAGGGGATTTTAGGATTTGTGTT
CACGCTCACCGTGCCCAGTGAGCGAGGACTGCAGCGTAGACGCTTTGTCCAAAATGCCCTAAATGGAAATGG
GGACCCGAACAACATGGATAGAGCAGTTAAGCTATACAAGAAGCTCAAAAGAGAAATAACATTCCATGGGGC
AAAGGAGGTGTCACTAAGCTATTCAACTGGTGCACTTGCCAGTTGCATGGGCCTCATATACAACAGGATGGG
AACAGTAACCACAGAAGCTGCTTTTGGTCTAGTGTGTGCCACTTGTGAACAGATTGCTGATTCACAGCATCG
GTCTCACAGACAAATGGCTACTACCACCAATCCACTGATCAGGCATGAAAACAGGATGGTGCTGGCTAGCAC
TACGGCAAAGGCTATGGAACAGATGGCTGGATCGAGTGAGCAGGCAGCAGAGGCCATGGAGGTTGCTAATAA
GACTAGACAGATGGTACATGCAATGAGAACTATTGGGACTCATCCTAGCTCCAGTGCTGGTCTGAAAGATGA
TCTTCTTGAAAATTTGCAGGCCTACCAGAAGCGAATGGGAGTGCAAATGCAGCGATTCAAATGATCCTCTCG
TCATTGCAGCAAATATCATTGGAATCTTGCACCTGATATTGTGGATTTCTGATCGTCTTTTTTTCAAATGTG
TTTATCGTCACTTTAAATACGGTTTGAAAAGAGGGCCTTCTACAGAAGGAGTGCCTGAGTCCATGAGGGAAG
AATATCAACAGGAACAGCAGAGTTCTGTGGATGTTGACGATGGTCATTTTGTCAACATAGAGCTAGAGTAA-
-------------------
>A/swine/Ohio/OH_17_25426/2017/1-982
-------------------------ATGAGTCTTCTAACCGAGGTCGAAACGTACGTTCTTTCTATCATACC
GTCAGGCCCCCTCAAAGCCGAGATTGCGCAGAGACTGGAAAGTGTCTTTGCAGGAAAGAATACAGACCTTGA
GGCTCTCATGGAATGGCTAAAGACAAGACCAATCTTGTCACCTTTGACTAAGGGAATTTTAGGATTTGTGTT
CACGCTCACCGTGCCCAGTGAGCGAGGACTGCAGCGTAGACGYTTTGTCCAAAATGCCCTGAATGGGAATGG
GGACCCAAACAACATGGATAGAGCAGTTAAACTATACAAGAAGCTCAAAAGAGAAATAACGTTCCATGGGGC
CAAGGAGGWGTCACTAAGCTATTCAACTGGTGCACTTGCCAGTTGCATGGGCCTCATATACAACAGGATGGG
AACAGTGACCACAGAAGCTGCTTTTGGTCTAGTGTGTGCCACTTGTGAACAGATTGCTGATTCACAGCATCG
GTCTCACAGACAGATGGCTACAACCACCAATCCACTAATCAGGCATGAGAACAGAATGGTGCTGGCTAGCAC
TACGGCAAAGGCTATGGAACAGATGGCTGGATCAAGTGAACAGGCAGCGGAGGCCATGGAGATTGCTAATCA
GACTAGGCAGATGGTACATGCAATGAGAACTATTGGGACTCATCCTAGTTCCAGTACTGGTCTGAAAGATGA
CCTTCTTGAAAATTTGCAGGCCTATCAGAAACGAATGGGAGTGCAGATGCAGCGGTTTAAGTGATCCACTCG
CCATTGCAGCAAATATCATCGGGATCTTGCACCTGATATTGTGGATTACTGATCGTCTTTTTTTCAAATGTA
TTTATCGTCGCTTTAAATACGGTTTGAAAAGAGGGCCTTCTACGGAAGGAGTGCCTGAGTCCATGAGGGAAG
AATATCAACAGGAACAGCAGAGTGCTGTGGATGTTGACGATGGTCATTTTGTCAACATAGAGCTGGAGTAA-
-------------------
>A/swine/Missouri/A02136832/2017/1-982
-------------------------ATGAGTCTTCTAACCGAGGTCGAAACGTACGTTCTTTCTATCATACC
GTCAGGCCCCCTCAAAGCCGAGATCGCGCAGAGACTGGAAAGTGTCTTTGCAGGAAAGAACACAGATCTTGA
GGCTCTCATGGAATGGCTAAAGACAAGACCAATCTTGTCACCTCTGACTAAGGGAATTTTAGGGTTTGTGTT
CACGCTCACCGTGCCCAGTGAGCGAGGACTGCAGCGTAGACGCTTTGTCCAAAATGCCCTAAATGGGAATGG
GGACCCAAACAACATGGATAGAGCAGTTAAACTATACAAGAAGCTCAAAAGAGAAATAACGTTCCATGGGGC
CAAGGAGGTGTCACTAAGCTATTCAACTGGTGCACTTGCCAGTTGCATGGGCCTCATATACAACAGGATGGG
AACAGTGACCACAGAGGCTGCTTTTGGTCTAGTGTGTGCCACTTGTGAACAGATTGCTGATTCACAGCATCG
GTCTCACAGACAAATGGCTACTACCACCAATCCGCTAATCAGGCATGAAAACAGAATGGTGCTGGCTAGCAC
TACGGCAAAGGCTATGGAACAGATGGCTGGATCGAGTGAACAGGCAGCGGAGGCCATGGAGGTTGCTAATCA
GACTAGGCAGATGGTACATGCAATGAGAACTATTGGGACTCATCCTAGCTCCAGTACTGGTCTGAAAGATGA
CCTTCTTGAAAATTTACAGGCCTACCAGAAGCGAATGGGAGTGCAGATGCAGCGATTCAAGTGATCCTCTCG
CCATTGCAGCAAATATCATTGGGATCTTGCACCTGATATTGTGGATTACTGATCGTCTTTTTTTCAAATGTA
TTTATCGTCGCTTTAAATACGGTTTGAAAAGAGGGCCTTCTACGGAAGGGGTGCCTGAGTCCATGAGGGAAG
AATATCAACAGGAACAGCAGAGTGCTGTGGATGTTGACGATGGTCATTTTGTCAACATAGAGCTAGAGTAA-
-------------------
>A/swine/Iowa/A02135881/2017/1-982
-------------------------ATGAGTCTTCTAACCGAGGTCGAAACGTACGTTCTTTCTATCATCCC
GTCAGGCTCCCTCAAAGCCGAGATCGCGCAGAGACTGGAAAGTGTTTTCTCAGGAAAGAGCGCAGATCTTGA
GGCTCTCATGGAATGGCTAAAGACAAGACCAATCTTGTCACCTCTGACTAAGGGGATTTTAGGATTTGTGTT
CACGCTCACCGTGCCCAGTGAGCGAGGACTGCAGCGTAGACGCTTTGTCCAAAATGCCCTAAATGGGAATGG
GGACCCGAACAACATGGATAGAGCAGTTAAACTATACAAGAAGCTCAAAAGAGAAATAACGTTCCATGGGGC
CAAGGAGGTGTCACTAAGCTATTCAACTGGTGCACTTGCCAGTTGCATGGGCCTCATATACAACAGAATGGG
AACAGTGACCACAGAAGCTGCTTTTGGTCTAGTGTGTGCCACTTGTGAACAGATTGCTGATTCACAGCATCG
GTCTCACAGACAAATGGCTACTACCACCAATCCACTAATCAGGCATGAAAACAGAATGGTGCTGGCTAGCAC
TACGGCAAAGGCTATGGAACAGATGGCTGGATCGAGTGAACAGGCAGCAGAGGCCATGGAGGTTGCTAATCA
AACTAGGCAGATGGTACATGCAATGAGAACCATTGGGACTCATCCTAGCTCCAGTGCTGGTCTGAAAGATGA
CCTTCTTGAAAATTTGCAGGCCTACCAGAAGCGAATGGGAGTGCAGATGCAGCGATTCAAATGATCCTCTCG
TCATTGCAGCAAATATCATTGGGATCTTGCACCTGATATTGTGGATTACTGATCGTCTTTTCTTCAAATGTA
TCTATCGTCGCTTTAAATACGGTTTGAAAAGAGGGCCTTCTACGGAAGGAGTGCCTGAGTCCATGAGGGAAG
AATATCAACAGGAACAGCAGAGTGCTGTGGATGTTGACGATGGTCATTTTGTCAACATAGAGCTAGAGTAA-
-------------------
>A/swine/Iowa/A02135101/2017/1-982
-------------------------ATGAGTCTTCTAACCGAGGTCGAAACGTACGTTCTTTCTATCATACC
GTCAGGCCCCCTCAAAGCCGAGATTGCGCAGAGACTGGAAAGTGTCTTTGCAGGAAAGAATACAGACCTTGA
GGCTCTCATGGAATGGCTAAAGACAAGACCAATCTTGTCACCTTTGACTAAGGGAATTTTAGGATTTGTGTT
CACGCTCACCGTGCCCAGTGAGCGAGGACTGCAGCGTAGACGCTTTGTCCAAAATGCCCTGAATGGGAATGG
GGACCCAAACAACATGGATAGAGCAGTTAAACTATACAAGAAGCTCAAAAGAGAAATAACGTTCCATGGGGC
CAAGGAGGTGTCACTAAGCTATTCAACTGGTGCACTTGCCAGTTGCATGGGCCTCATATACAACAGGATGGG
AACAGTGACCACAGAAGCTGCTTTTGGTCTAGTGTGTGCCACTTGTGAACAGATTGCTGATTCACAGCATAG
GTCTCACAGACAGATGGCTACAACCACCAATCCACTAATCAGGCATGAGAACAGAATGGTGCTGGCTAGCAC
TACGGCGAAGGCTATGGAACAGATGGCTGGATCGAGTGAACAGGCAGCGGAGGCCATGGAGGTTGCTAATCA
GACTAGACAGATGGTACATGCAATGAGAACTATTGGGACTCATCCTAGCTCCAGTACTGGTCTGAAAGATGA
CCTTCTTGAAAATTTGCAGGCCTATCAGAAGCGAATGGGAGTGCAGATGCAGCGGTTTAAGTGATCCTCTCG
CCATTGCAGCAAATATCATTGGGATCTTGCACCTGATATTGTGGATTACTGATCGTCTTTTTTTCAAATGTA
TTTATCGTCGCTTTAAATACGGTTTGAAAAGAGGGCCTTCTACGGAAGGAGTGCCTGAGTCCATGAGGGAAG
AATATCAACAGGAACAGCAGAGTGCTGTGGATGTTGACGATGGTCATTTTGTCAACATAGAGCTGGAGTAA-
-------------------
>A/swine/Oklahoma/A02136057/2017/1-982
-------------------------ATGAGTCTTCTAACCGAGGTCGAAACGTACGTTCTTTCTATCATACC
GTCAGGCCCCCTCAAAGCCGAGATTGCGCAGAGACTGGAAAGTGTCTTTGCAGGAAAGAATACAGACCTTGA
GGCTCTCATGGAATGGCTAAAGACAAGACCAATCTTGTCACCTTTGACTAAGGGAATTTTAGGATTTGTGTT
TACGCTCACCGTGCCCAGTGAGCGAGGACTGCAGCGTAGACGCTTTGTCCAAAATGCCCTGAATGGGAATGG
GGACCCAAACAACATGGATAGAGCAGTTAAACTATACAAGAAGCTCAAAAGAGAAATAACGTTCCATGGGGC
CAAGGAGGTGTCACTAAGCTATTCAACTGGTGCACTTGCCAGTTGCATGGGCCTCATATACAACAGGATGGG
AACAGTGACCACTGAAGCTGCTTTTGGTCTAGTGTGTGCCACTTGTGAACAAATTGCTGATTCACAGCATCG
GTCTCACAGACAGATGGCCACAACCACCAATCCACTAATCAGGCATGAGAACAGAATGGTGCTGGCTAGCAC
TACGGCAAAGGCTATGGAACAGATGGCTGGATCGAGTGAACAGGCAGCGGAGGCCATGGAGGTTGCTAATCA
GACTAGACAGATGGTACATGCAATGAGAACTATCGGGACTCATCCTAGTTCCAGTACTGGTCTGAAAGATGA
CCTTCTTGAAAATTTGCAGGCCTATCAGAAGCGAATGGGAGTGCAGATGCAGCGGTTTAAGTGATCCTCTCG
CCATTGCAGCTAATATCATTGGGATCTTGCACCTGATATTGTGGATTACTGATCGTCTTTTTTTCAAATGTA
TTTGTCGTCGCTTTAAATACGGTTTGAAAAGAGGGCCTTCTACGGAAGGAGTGCCTGAGTCCATGAGGGAAG
AATATCAACAGGAACAGCAGAGTGCTGTGGATGTTGACGATGGTCATTTTGTCAACATAGAGCTGGAGTAA-
-------------------
>A/swine/Nebraska/A02136760/2017/1-982
-------------------------ATGAGTCTTCTAACCGAGGTCGAAACGTACGTTCTTTCTATCATCCC
GTCAGGCTCCCTCAAAGCCGAGATCGCGCAGAGACTGGAAAGTGTTTTCTCAGGAAAGAGCGCAGATCTTGA
GGCTCTCATGGAATGGCTAAAGACAAGACCAATCTTGTCACCTCTGACTAAGGGGATTTTAGGATTTGTGTT
CACGCTCACCGTGCCCAGTGAGCGAGGACTGCAGCGTAGACGCTTTGTCCAAAATGCCCTAAATGGGAATGG
GGACCCGAACAACATGGATAGAGCAGTTAAACTATACAAGAAGCTCAAAAGAGAAATAACGTTCCATGGGGC
CAAGGAGGTGTCACTAAGCTATTCAACTGGTGCACTTGCCAGTTGCATGGGCCTCATATACAACAGAATGGG
AACAGTGACCACAGAAGCTGCTTTTGGTCTAGTGTGTGCCACTTGTGAACAGATTGCTGATTCACAGCATCG
GTCTCACAGACAAATGGCTACTACCACTAATCCACTAATCAGGCATGAAAACAGAATGGTGCTGGCTAGCAC
TACGGCAAAGGCTATGGAACAGATGGCTGGATCGAGTGAACAGGCAGCAGAGGCCATGGAGGTTGCTAATCA
AACTAGGCAGATGGTACATGCAATGAGAACCATTGGGACTCATCCTAGCTCCAGTGCTGGTCTGAAAGATGA
CCTTCTTGAAAATTTGCAGGCCTACCAGAAGCGAATGGGAGTGCAGATGCAGCGATTCAAATGATCCTCTCG
TCATTGCAGCAAATATCATTGGGATCTTGCACCTGATATTGTGGATTACTGATCGTCTTTTCTTCAAATGTA
TTTATCGTCGCTTTAAATACGGTTTGAAAAGAGGGCCTTCTACGGAAGGAGTGCCTGAGTCCATGAGGGAAG
AATATCAACAGGAACAGCAGAGTGCTGTGGATGTTGACGATGGTCATTTTGTCAACATAGAGCTAGAGTAA-
-------------------
>A/swine/North_Carolina/A02137008/2017/1-982
-------------------------ATGAGTCTTCTAACCGAGGTCGAAACGTACGTTCTGTCTATCATTCC
GTCAGGCCCCCTCAAAGCCGAGATCGCGCAGAGATTGGAAAGTGTCTTTGCAGGAAAGAACACAGATCTTGA
GGCTCTCATGGAATGGCTAAAGACAAGACCAATCTTGTCACCTCTGACTAAGGGAATTTTAGGATTTGTGTT
CACGCTCACCGTGCCCAGTGAGCGAGGACTGCAGCGTAGACGCTTTGTCCAAAATGCCCTGAATGGGAATGG
GGATCCAAACAACATGGATAGAGCAGTTAAACTATACAAGAAGCTCAAAAGAGAAATAACGTTCCATGGGGC
AAAGGAGGTGTCACTTAGCTATTCAACTGGTGCACTTGCCAGTTGCATGGGCCTCATATACAACAGGATGGG
AACAGTGACCACAGAAGCTGCTTTTGGTCTAGTGTGTGCCACTTGTGAACAGATTGCTGATTCACAGCATCG
GTCTCACAGACAGATGGCTACTACCACCAATCCACTAATTAGGCATGAGAACAGAATGGTGCTGGCTAGCAC
TACAGCAAAGGCTATGGAACAGATGGCTGGATCGAGTGAACAGGCAGCGGAGGCCATGGAGGTTGCTAATCA
GACTAGGCAGATGGTACATGCAATGAGAACTATTGGGACTCATCCTAGCTCCAGTACTGGTCTGAAAGATGA
CCTTCTTGAAAATTTGCAGGCCTACCAGAAGCGAATGGGAGTGCAGATGCAGCGATTCAAATGATCCTCTCG
CCATTGCAGCAAATATCATTGGGATCTTGCACCTGATATTGTGGATTACTGATCGTCTTTTTTTCAAATGCA
TTTATCGTCGCTTTAAATACGGTTTGAAAAGAGGGCCTTCTACGGAAGGAGTGCCTAAGTCCATGAGGGAAG
AATATCAACAGGAACAGCAGAGTGCTGTGGATGTTGACGATGGTCATTTTGTCAACATAGAGCTAGAGTAA-
-------------------
>A/swine/Ohio/A02136764/2017/1-982
-------------------------ATGAGTCTTCTGACCGAGGTCGAAACGTACGTTCTTTCTATCATCCC
GTCAGGCCCCCTCAAAGCCGAGATCGCACAGAGACTGGAAAGTGTCTTTGCAGGAAAGAACACAGATCTTGA
GGCCCTCATGGAATGGCTAAAGACAAGACCAATCTTGTCACCTCTGTCTAAGGGGATTTTAGGATTTGTGTT
CACGCTCACCGTGCCCAGTGAGCGAGGACTGCAGCGTAGACGTTTTGTCCAAAATGCCCTAAATGGAAATGG
GGACCCGAACAACATGGATAGAGCAGTTAAGCTATACAAGAAGCTCAAAAGAGAAATAACATTCCATGGGGC
CAAGGAGGTGTCACTAAGCTATTCAACTGGTGCACTTGCCAGTTGCATGGGCCTCATATACAACAGGATGGG
AACAGTAACCACAGAAGCTGCTTTTGGTCTAGTGTGTGCCACTTGTGAACAGATTGCTGATTCACAGCATCG
GTCTCACAGACAAATGGCTACTACCACCAATCCACTGATCAGGCATGAAAACAGGATGGTGCTGGCTAGCAC
TACGGCAAAGGCTATGGAACAGATGGCTGGATCGAGTGAGCAGGCAGCAGAGGCCATGGAGGTTGCTAATAA
GACTAGGCAGATGGTACATGCAATGAGAACTATTGGGACTCATCCTAGCTCCAGTGCTGGTCTGAAAGATGA
TCTTCTTGAAAATTTGCAGGCCTACCAGAAGCGAATGGGAGTGCAAATGCAGCGATTCAAATGATCCTCTCG
TCATTGCAGCAAATATCATTGGGATCTTGCACCTGATATTGTGGATTTCTGATCGTCTTTTTTTCAAATGTG
TTTATCGTCACTTTAAATACGGTTTGAAAAGAGGGCCTTCTACAGAAGGAGTGCCTGAGTCCATGAGGGAAG
AATATCAGCAGGAACAGCAGAGTTCTGTGGATGTTGACGATGGTCATTTTGTCAACATAGAGCTAGAGTAA-
-------------------
>A/swine/Indiana/A02135877/2017/1-982
-------------------------ATGAGTCTTCTAACCGAGGTCGAAACGTACGTTCTTTCTATCATCCC
GTCAGGCCCCCTCAAAGCCGAGATCGCGCAGAGACTGGAAAGTGTATTTGCAGGGAAGAACACAGATCTTGA
GGCTCTCATGGAATGGCTAAAGACAAGACCAATCTTGTCACCTCTGACTAAGGGAATTTTAGGATTTGTGTT
TACGCTCACCGTGCCCAGTGAGCGAGGACTGCAGCGTAGACGCTTTGTCCAAAATGCCCTAAATGGGAATGG
GGACCCGAACAACATGGATAGAGCAGTTAAACTATACAAGAAGCTCAAAAGAGAAATAACGTTCCATGGGGC
TAAGGAGGTGTCACTAAGCTATTCAACTGGTGCACTTGCCAGTTGCATGGGCCTCATATACAACAGGATGGG
AACAGTGACCACAGAAGCTGCTTTTGGTCTAGTGTGTGCCACTTGTGAACAGATTGCTGATTCACAGCATCG
ATCTCACAGACAAATGGTTACTACCACCAATCCACTAATCAGGCATGAAAACAGAATGGTGCTGGCTAGCAC
TACTGCAAAGGCTATGGAACAGATGGCTGGATCGAGTGAACAGGCAGCAGAGGCCATGGAGGTTGCTAATCA
GACTAGGCAGATGGTACATGCAATGAGAACTATTGGGACTCATCCTAGCTCCAGTGCTGGTCTGAAGGATGA
CCTTCTTGAAAATTTACAGGCCTACCAGAAGCGAATGGGAGTGCAAATGCAGCGATTCAAGTGATCCTCTCG
TCATTGCAGCAAATATCATTGGGATCTTGCACCTGATATTGTGGATTACTGATCGTCTTTTTTTCAAATGTA
TTTATCGTCGCTTTAAATACGGTTTGAAAAGAGGGCCTCCTACAGAAGGAGTTCCTGAATCCATGAGGGAAG
AATATCAACAGGAGCAGCAGAGTGCTGTGGATGTTGACGATGGTCATTTTGTCAACATAGAGCTAGAGTAA-
-------------------
>A/swine/Missouri/A02136836/2017/1-982
-------------------------ATGAGTCTTCTAACCGAGGTCGAAACGTACGTTCTTTCTATCATCCC
GTCAGGCTCCCTCAAAGCCGAGATCGCGCAGAGACTGGAAAGTGTTTTTTCAGGAAAGAACACAGATCTTGA
GGCTCTCATGGAATGGCTAAAGACAAGACCAATCTTGTCACCTCTGACCAAGGGGATTTTAGGATTTGTGTT
CACGCTCACCGTGCCCAGTGAGCGAGGACTGCAGCGTAGACGCTTTGTCCAAAATGCCCTAAATGGGAATGG
GGACCCGAACAACATGGATAGAGCAGTTAAACTATACAAGAAGCTCAAAAGAGAAATAACGTTCCATGGGGC
CAAGGAGGTGTCACTAAGCTATTCAACTGGTGCACTTGCCAGTTGCATGGGCCTCATATACAACAGGATGGG
AACAGTGACCACAGAAGCTGCTTTTGGTCTAGTGTGTGCCACTTGTGAACAGATTGCTGATTCACAGCATCG
GTCTCACAGACAAATGGCTACTACCACCAATCCACTAATCAGACATGAAAACAGAATGGTGCTAGCTAGCAC
TACGGCAAAGGCTATGGAACAGATGGCTGGATCGAGTGAACAGGCAGCAGAGGCCATGGAGGTTGCTAATCA
AACTAGGCAGATGGTACATGCAATGAGAACTATTGGGACTCATCCTAGCTCCAGTGCTGGTCTGAAAGATGA
CCTTCTTGAAAATTTGCAGGCTTACCAGAAGCGAATGGGAGTGCAGATGCAGCGATTCAAATGACCCTCTCG
TCATTGCAGCAAATATCATTGGGATCTTGCACCTGATATTGTGGATTACTGATCGTCTTTTTTTCAAATGTA
TTTATCGTCGCTTTAAATACGGTTTGAAAAGAGGGCCTTCTACGGAAGGAGTGCCTGAGTCCATGAGGGAAG
AATATCAACAGGAACAGCAGAGTGCTGTGGATGTTGACGATAGTCATTTTGTCAACATAGAGCTAAAGTAA-
-------------------
>A/swine/Iowa/A02136685/2017/1-982
-------------------------ATGAGTCTTCTAACCGAGGTCGAAACGTACGTTCTTTCTATCATACC
GTCAGGCCCCCTCAAAGCCGAGATTGCGCAGAGACTGGAAAGTGTCTTTGCAGGAAAGAATACAGACCTTGA
GGCTCTCATGGAATGGCTAAAGACAAGACCAATCTTGTCACCTTTGACTAAGGGAATTTTAGGATTTGTGTT
CACGCTCACCGTGCCCAGTGAGCGAGGACTGCAGCGTAGACGCTTTGTCCAAAATGCCCTGAATGGGAATGG
GGACCCAAACAACATGGATAGAGCAGTTAAACTATACAAGAAGCTCAAAAGAGAAATAACGTTCCATGGGGC
CAAGGAGGTGTCACTAAGCTATTCAACTGGTGCACTTGCCAGTTGCATGGGCCTCATATACAACAGGATGGG
AACAGTGACCACAGAAGCTGCTTTTGGTCTAGTGTGTGCCACTTGTGAACAGATTGCTGATTCACAGCATCG
GTCTCACAGACAGATGGCTACAACCACCAATCCACTAATCAGGCATGAGAACAGAATGGTGCTAGCTAGCAC
TACGGCAAAGGCTATGGAACAGATGGCTGGATCAAGTGAACAGGCAGCGGAGGCCATGGAGATTGCTAATCA
GACTAGGCAGATGGTACATGCAATGAGAACTATTGGGACTCATCCTAGTTCCAGTACTGGTCTGAAAGATGA
CCTTCTTGAAAATTTGCAGGCCTATCAGAAACGAATGGGAGTGCAGATGCAGCGGTTTAAGTGATCCACTCG
CCATTGCAGCAAATATCATCGGGATCTTGCACCTGATATTGTGGATTACTGATCGTCTTTTTTTCAAATGTA
TTTATCGTCGCTTTAAATACGGTTTGAAAAGAGGGCCTTCTACGGAAGGAGTGCCTGAGTCCATGAGGGAAG
AATATCAACAGGAACAGCAGAGTGCTGTGGATGTTGACGATGGTCATTTTGTCAACATAGAGCTGGAGTAA-
-------------------
>A/swine/Indiana/A02136747/2017/1-982
-------------------------ATGAGTCTTCTAACCGAGGTCGAAACGTACGTTCTGTCTATCATCCC
GTCAGGCCCCCTCAAAGCCGAGATCGCGCAGAGACTGGAAAGTGTCTTTGCAGGGAAGAACACAGATCTTGA
GGCCCTCATGGAATGGCTAAAGACAAGACCAATCTTGTCACCTCTGACTAAGGGAATTTTAGGATTTGTGTT
CACGCTCACCGTGCCCAGTGAGCGAGGACTGCAGCGTAGACGCTTTGTCCAAAATGCCCTGAATGGAAATGG
GGACCCAAACAACATGGATAGAGCAGTTAAACTATACAAGAAGCTCAAAAGAGAAATAACGTTCCATGGGGC
AAAGGAGGTGTCACTTAGCTATTCAACTGGTGCACTTGCCAGTTGCATGGGCCTCATATACAACAGGATGGG
AACAGTGACCACAGAAGCTGCTTTTGGTCTAGTGTGTGCCACTTGTGAACAGATTGCTGATTCACAGCATCG
GTCTCACAGACAGATGGCTACTACCACCAATCCACTAATTAGGCATGAGAACAGAATGGTGCTGGCTAGCAC
TACAGCAAAGGCTATGGAACAGATGGCTGGATCGAGTGAACAGGCAGCGGAGGCCATGGAGGTTGCCAATCA
GACTAGGCAGATGGTACATGCAATGAGAACTATTGGGACTCATCCTAGTTCCAGTACTGGTCTGAAAGATGA
CCTTCTTGAAAATTTGCAGGCCTACCAGAAGCGAATGGGAGTGCAGATGCAGCGATTCAAGTGATCCCCTCG
CCATTGCAGCCAATATCATTGGGATCTTGCACCTGATATTGTGGATTACTGATCGTCTTTTTTTCAAATGCA
TTTATCGTCGCTTTAAATACGGTTTGAAAAGAGGGCCTTCTACGGAAGGAGTGCCTGAGTCCATGAGGGAAG
AATATCAACAGGAACAGCAGAGTGCTGTGGATGTTGACGATGGTCATTTTGTCAACATAGAGCTAGAGTAA-
-------------------
>A/swine/Nebraska/A02136881/2017/1-982
-------------------------ATGAGTCTTCTAACCGAGGTTGAAACGTACGTTCTTTCTATCATCCC
GTCAGGCCCCCTCAAAGCCGAGATCGCGCAGAGACTGGAAAGTGTCTTTGCAGGAAAGAACACAGATCTTGA
GGCTCTCATGGAATGGCTAAAGACAAGACCAATCTTGTCACCTCTGACTAAGGGAATTTTAGGATTTGTGTT
CACGCTCACCGTGCCCAGTGAGCGAGGACTGCAGCGTAGACGCTTTGTCCAAAATGCCCTAAATGGAAATGG
GGACCCCAACAACATGGATAGAGCAGTTAAACTATACAAGAAGCTCAAAAGAGAAATAACGTTCCATGGGGC
TAAGGAGGTGTCACTAAGCTATTCAACTGGTGCACTTGCCAGTTGCATGGGCCTCATATACAACAGGATGGG
AACAGTGACCACAGAAGCTGCTTTTGGTCTAGTGTGTGCCACCTGTGAACAGATTGCTGATTCACAGCATCG
GTCTCACAGACAAATGGCTACAACCACCAATCCACTAATCAGGCATGAAAATAGAATGGTGCTGGCTAGCAC
GACTGCAAAGGCTATGGAACAGATGGCTGGATCGAGTGAACAGGCAGCAGAGGCCATGGAGGTTGCTAATCA
GACTAGGCAGATGGTACATGCAATGAGAACTATTGGGACTCATCCTAGCTCCAGTGCTGGTCTGAAAGATGA
CCTTCTTGAAAATTTACAGGCCTATCAGAAGCGAATGGGAGTGCAAATGCAGCGATTCAAGTGATCCTCTCG
TCATTGCAGCAAATATCATTGGGATCTTGCACTTGATATTGTGGATTACTGATCGTCTTTTTTTCAAATATA
TTTACCGTCGCTTTAAATACGGTTTGAAAAGAGGGCCTTCTACAGAAGGAGTGCCTGAGTCCATGAGGGAAG
AATATCAACAGGAACAGCAGAGTGCTGTGGATGTTGACGATGGTCATTTTGTCAACATAGAGCTAGAGTAA-
-------------------
>A/swine/Iowa/A02137183/2017/1-982
-------------------------ATGAGTCTTCTAACCGAGGTCGAAACGTACGTTCTTTCTATCATCCC
GTCAGGCTCCCTCAAAGCCGAGATCGCGCAGAGACTGGAAAGTGTTTTTTCAGGAAAGAACGCAGATCTTGA
GGCTCTCATGGAATGGCTAAAGACAAGACCAATCTTGTCACCTCTGACTAAGGGGATTTTAGGATTTGTGTT
CACGCTCACCGTGCCCAGTGAGCGAGGACTGCAGCGTAGACGCTTTGTCCAAAATGCCCTAAATGGGAATGG
GGACCCGAACAACATGGATAGAGCAGTTAAACTATACAAGAAGCTCAAAAGAGAAATAACGTTCCATGGGGC
CAAGGAGGTGTCACTAAGCTATTCAACTGGTGCACTTGCCAGTTGCATGGGCCTCATATACAACAGAATGGG
AACAGTGACCGCAGAAGCTGCTTTTGGTCTAGTGTGTGCCACTTGTGAACAGATTGCTGATTCACAGCATCG
GTCCCACAGACAAATGGCTACTACCACCAATCCACTAATCAGGCATGAAAACAGAATGGTGCTGGCTAGCAC
TACGGCAAAGGCTATGGAACAGATGGCTGGATCAAGTGAACAGGCAGCAGAGGCCATGGAGGTTGCTAATCA
AACTAGGCAGATGGTACATGCAATGAGAACCATTGGGACTCATCCTAGCTCCAGTGCTGGTCTGAAAGATGA
CCTTCTTGAAAATTTGCAGGCCTACCAGAAGCGAATGGGAGTGCAGATGCAGCGATTCAAATGATCCTCTCG
TCATTGCAGCAAATATCATTGGGATCTTGCACCTGATATTGTGGATTACTGATCGTCTTTTCTTCAAATGTA
TTTATCGTCGCTTTAAATACGGTTTGAAAAGAGGGCCTTCTACGGAAGGAGTGCCTGAGTCCATGAGGGAAG
AATATCAACAGGAACAGCAGAGTGCTGTGGATGTTGACGATGGTCATTTTGTCAACATAGAGCTAGAGTAA-
-------------------
>A/swine/North_Carolina/A02135886/2017/1-982
-------------------------ATGAGCCTTCTAACCGAGGTCGAAACGTATGTTCTTTCTATTATACC
GTCAGGCCCCCTCAAAGCCGAGATCGCGCAGAGACTGGAAAGTGTCTTTGCAGGAAAGAACACAGATCTTGA
GGCTCTCATGGAATGGCTAAAGACAAGACCAATCTTGTCACCTCTGACTAAGGGAATTTTAGGATTTGTGTT
CACGCTCACCGTGCCCAGTGAGCGAGGACTGCAGCGTAGACGCTTTGTCCAAAATGCCCTGAATGGAAATGG
GGACCCAAACAACATGGATAGGGCAGTTAAACTATACAAGAAGCTCAAAAGAGAAATAACGTTCCATGGGGC
AAAAGAGGTATCACTAAGCTATTCAACTGGTGCACTTGCCAGCTGCATGGGCCTCATATACAACAGGATGGG
GACAGTGACCACAGAAGCTGCTTTTGGTCTAGTGTGTGCCACTTGTGAACAGATTGCTGATTCACAGCATCG
GTCTCACAGACAGATGGCTACTACCACCAATCCACTAATCAGGCATGAGAACAGAATGGTGCTGGCCAGCAC
TACAGCAAAGGCTATGGAACAGATGGCTGGATCGAGTGAACAGGCAGCGGAGGCCATGGAGGTTGCTAATCA
GACTAGGCAGATGGTACATGCAATGAGAACTATTGGGACTCATCCTAGCTCCAGTACTGGTCTGAAAGATGA
CCTTCTTGAAAATTTGCAGGCCTACCAGAAGCGAATGGGAGTGCAGATGCAGCGATTCAAGTGATCCTCTCT
CCATTGTAGCAAATATCATTGGGATCTTGCACCTGATATTGTGGATTACTGACCGTCTTTTCTTCAAATGCA
TTTATCGTCGCTTTAAATACGGTTTGAAAAGAGGGCCTTCTACGGAAGGAGTGCCTGAGTCCATGAGGGAAG
AATATCAACAGGAACAGCAGAATGCTGTGGATGTTGACGATGGTCATTTTGTCAACATAGAGCTAGAGTAA-
-------------------
>A/swine/Minnesota/A02135748/2017/1-982
-------------------------ATGAGTCTTCTAACCGAGGTCGAAACGTACGTTCTTTCTATCATCCC
GTCAGGCCCCCTCAAAGCCGAGATCGCGCAGAGACTGGAAAGTGTCTTTGCAGGAAAGAACACAGATCTTGA
GGCTCTCATGGAATGGCTAAAGACAAGACCAATCTTGTCACCTTTGACTAAGGGTATTTTAGGATTTGTGTT
CACGCTCACCGTGCCCAGTGAGCGAGGACTGCAGCGTAGACGCTTTGTCCAAAATGCCCTAAATGGGAATGG
GGACCCAAACAACATGGATAGAGCAGTTAAACTATACAAGAAGCTCAAAAGAGAAATAACGTTCCATGGGGC
CAAGGAGGTGTCACTAAGCTATTCAACTGGCGCACTTGCCAGTTGCATGGGCCTTATATACAACAGGATGGG
AACAGTAACCACAGAAGCTGCTTTTGGTCTAGTATGTGCCACTTGTGAACAGATCGCTGATTCACAGCATCG
GTCTCACAGACAAATGGCTACTACCACCAATCCACTAATCAGGCATGAAAACAGAATGGTGCTGGCTAGCAC
TACGGCAAAGGCTATGGAACAGATGGCTGGATCGAGTGAACAGGCAGCAGAGGCCATGGAGGTTGCTAACCA
GACTAGGCAAATGGTACATGCAATGAGAACTATTGGTACTCATCCTAGCTCCAGTGCTGGTCTAAAAGATGA
CCTTCTTGAAAATTTGCAGGCCTACCAGAAACGAATGGGAGTGCAGATGCAGCGATTCAAGTGATCCTCTCG
TCATTGCAGCAAATATCATTGGGATCTTGCACCTGATATTGTGGATTACAGATCGTCTTTTTTTCAAATGCA
TTTATCGTCGCTTTAAATACGGGTTGAAAAGAGGGCCCTCTACGGAAGGAGTGCCTGAGTCCATGAGGGAAG
AATATCAACAGGAACAGCAGAGTGCTGTGGATGTTGACGATGGTCATTTTGTCAACATAGAGCTAGAGTAA-
-------------------
>A/swine/Oklahoma/A02135952/2017/1-982
-------------------------ATGAGTCTTCTAACCGAGGTCGAAACGTACGTTCTTTCTATCATCCC
GTCAGGCCCCCTCAAAGCCGAGATCGCGCAGAGACTGGAAAGTGTATTTGCAGGAAAGAACACAGATCTTGA
GGCTCTCATGGAATGGCTAAAGACAAGACCAATCTTGTCACCTCTGACTAAGGGAATTTTAGGATTTGTGTT
CACGCTCACCGTGCCCAGTGAGCGAGGACTGCAGCGTAGACGCTTTGTCCAAAATGCCCTAAATGGGAATGG
GGACCCGAACAACATGGATAGAGCAGTTAAACTATACAAGAAGCTCAAAAGAGAAATAACGTTCCATGGGGC
TAAAGAGGTGTCACTAAGCTATTCAACTGGTGCACTTGCCAGTTGCCTGGGCCTCATATACAACAGGATGGG
AACAGTGACCACAGAAGCTGCTTTTGGTCTAGTGTGTGCCACTTGTGAACAGATTGCTGATTCACAGCATCG
ATCTCACAGACAAATGGTTGCTACCACCAATCCACTAATCAGGCATGAAAACAGAATGGTGCTGGCTAGCAC
TACTGCAAAGGCTATGGAACAGATGGCTGGATCGAGTGAACAGGCAGCAGAGGCCATGGAGGTTGCTAATCA
GACTAGGCAGATGGTACATGCAATGAGGACTATTGGGACTCATCCTAGCTCCAGTGCTGGTCTGAAGGATGA
CCTTCTTGAAAATTTACAGGCCTACCAGAAGCGAATGGGAGTGCAAATGCAGCGATTCAAGTGATCCTCTCG
TCATTGCAGCAAATATCATTGGGATCTTGCACCTGATATTGTGGATTACTGATCGTCTTTTTTTCAAATGCA
TTTATCGTCGCTTTAAATACGGTTTGAAAAGAGGGCCTCCTACAGAAGGAGTGCCTGAGTCCATGAGGGAAG
AATATCAACAGGAACAGCAGAGTGCTGTAGATGTTGACGATGGTCATTTTGTCAACATAGAGCTAGAGTAA-
-------------------
>A/swine/Virginia/A02135749/2017/1-982
-------------------------ATGAGTCTTCTAACCGAGGTCGAAACGTACGTTCTTTCTATCATACC
GTCAGGCCCCCTCAAAGCCGAGATCGCACAGAGACTGGAAAGTGTCTTTGCAGGAAAGAACACAGATCTTGA
GGCTCTCATGGAATGGCTAAAGACAAGACCAATCTTGTCACCTCTGACTAAGGGAATTTTAGGATTTGTGTT
CACGCTCACCGTGCCCAGTGAGCGAGGACTGCAGCGTAGACGCTTTGTCCAAAATGCCCTAAATGGGAATGG
GGACCCAACCAACATGGATAGAGCAGTTAAACTATACAAGAAGCTCAAAAGAGAAATAACGTTCCATGGGGC
CAAGGAGGTGTCACTAAGCTATTCAACAGGTGCACTTGCCAGTTGCATGGGCCTCATATACAACAGGATGGG
AACAGTGACCACAGAGGCTGCTTTTGGTCTAGTGTGTGCCACCTGTGAACAGATTGCTGATTCACAGCATCG
GTCTCACAGACAGATGGCTACTACCACCAATCCACTAATCAGGCATGAGAACAGAATGGTGCTGGCTAGCAC
TACGGCAAAGGCTATGGAACAGATGGCTGGATCGAGTGAACAGGCAGCGGAGGCCATGGAGGTTGCTAGTCA
GACTAGGCAGATGGTACATGCAATGAGAACTATTGGGACTCATCCTAGCTCCAGTACTGGTCTGAAAGATGA
CCTTCTTGAAAATTTACAGGCCTACCAGAAGCGAATGGGAGTGCAGATGCAGCGATTCAAGTGATCCTCTTG
CCATTGCAGCAAATATCATTGGGATCTTGCACCTGATATTGTGGATTACTGATCGTCTTTTTTTCAAATGTA
TTTATCGTCGCTTTAAATACGGTTTGAAAAGAGGCCCTTCTACGGAAGGGGTGCCTGAGTCCATGAGGGAAG
AATATCAACAGGAACAGCAGAGTGCTGTGGATGTTGACGATGGTCATTTTGTCAACATAGAGCTAGAGTAA-
-------------------
>A/swine/Ohio/A01354347/2018/1-982
-------------------------ATGAGTCTTCTAACCGAGGTCGAAACGTACGTTCTTTCTATCATCCC
GTCAGGCCCCCTCAAAGCCGAGATCGCACAGAGACTGGAAAGTGTCTTTGCAGGAAAGAACACAGATCTTGA
GGCTCTCATGGAATGGCTAAAGACAAGACCAATCTTGTCACCTCTGACTAAGGGAATTTTAGGATTTGTGTT
CACGCTCACCGTGCCCAGTGAGCGAGGACTGCAGCGTAGACGCTTTATCCAAAATGCCCTAAATGGGAATGG
GGACCCGAACAACATGGATAGAGCAGTTAAACTATACAAGAAGCTCAAAAGAGAAATAACGTTCCATGGGGC
CAAGGAGGTGTCACTAAGCTATTCAACTGGTGCACTTGCAAGTTGCATGGGCCTCATATACAACAGGATGGG
AACAGTGACCACAGAAGCTGCTTTCGGTCTAGTTTGTGCCACTTGTGAACAGATTGCTGATTCACAGCATCG
GTCTCACAGACAAATGGCTACTACCACAAATCCACTAATCAGGCATGAAAACAGAATGGTGCTGGCTAGCAC
TACGGCAAAGGCTATGGAACAGGTGGCTGGATCGAGTGAACAGGCAGCGGAGGCCATGGAGGTTGCTAATAA
GACTAGGCAGATGGTACATGCAATGAGAACTATTGGGACTCATCCTAGCTCCAGTGCTGGTCTGAGAGATGA
CCTTCTTGAAAATTTGCAGGCCTACCAGAAGCGAATGGGAGTGCAGATGCAGCGGTTCAAGTGATTCTCTCG
TCATTGCAGCAAACATCATTGGGATCTTGCACCTGATATTGTGGATTACTGATCGTCTTTTTTTCAAATGCA
TTTATCGTCGCTTTAAATACGGTTTGAAAAGAGGGCCTTCTACGGAAGGAGTGCCTGAGTCCATGAGGGAAG
AATATCAACAGGAGCAGCAGAGTGCTGTGGATGTTGACGATGGTCATTTTGTCAACATAGAGCTAGAGTAA-
-------------------
>A/swine/Ohio/OH_18_5253/2018/1-982
-------------------------ATGAGTCTTCTAACCGAGGTCGAAACGTACGTTCTTTCTATCATACC
GTCAGGCCCCCTCAAAGCCGAGATTGCGCAGAGACTGGAAAGTGTCTTTGCAGGAAAGAATACAGACCTTGA
GGCTCTCATGGAATGGCTAAAGACAAGACCAATCTTGTCACCTTTGACTAAGGGAATTTTAGGATTTGTGTT
CACGCTCACCGTGCCCAGTGAGCGAGGACTGCAGCGTAGACGCTTTGTCCAAAATGCCCTGAATGGGAATGG
GGACCCAAACAACATGGATAGAGCAGTTAAACTATACAAGAAGCTCAAAAGAGAAATAACGTTCCATGGGGC
CAAGGAGGTGTCACTAAGCTATTCAACTGGTGCACTTGCCAGTTGCATGGGCCTCATATACAACAGGATGGG
AACAGTAACCACAGAAGCTGCTTTTGGTCTAGTGTGTGCCACTTGTGAACAGATTGCTGATTCACAGCATCG
GTCTCACAGACAGATGGCTACAACCACCAATCCACTAATCAGGCATGAGAACAGAATGGTGCTGGCTAGCAC
TACGGCAAAGGCTATGGAACAGATGGCTGGATCAAGTGAACAGGCAGCGGAGGCCATGGAGATTGCTAATCA
GACTAGGCAGATGGTACATGCAATGAGAACTATTGGGACTCATCCTAGTTCCAGTACTGGTCTGAAAGATGA
CCTTCTTGAAAATTTGCAGGCCTATCAGAAACGAATGGGAGTGCAGATGCAGCGGTTTAAGTGATCCACTCG
CCATTGCAGCAAATATCATCGGGATCTTGCACCTGATATTGTGGATTACTGATCGTCTTTTTTTCAAATGTA
TTTATCGTCGCTTTAAATACGGTTTGAAAAGAGGGCCTTCTACGGAAGGAGTGCCTGAGTCCATGAGGGAAG
AATATCAACAGGAACAGCAGAGTGCTGTGGATGTTGACGATGGTCATTTTGTCAACATAGAGCTGGAGTAA-
-------------------
>A/swine/Ohio/OH_18_6906/2018/1-982
-------------------------ATGAGTCTTCTAACCGAGGTCGAAACGTACGTTCTTTCTATCATACC
GTCAGGCCCCCTCAAAGCCGAGATCGCACAGAGACTGGAAAGTGTCTTTGCAGGAAAAAACACAGATCTTGA
GGCTCTCATGGAGTGGCTAAAGACAAGACCAATCTTGTCACCTCTGACTAAGGGAATTTTAGGATTTGTGTT
CACGCTCACCGTGCCCAGTGAGCGAGGACTGCAGCGTAGACGCTTTGTCCAAAATGCCCTAAATGGGAATGG
GGACCCAAACAACATGGATAGAGCAGTTAAACTATACAAGAAGCTCAAAAGAGAAATAACGTTCCATGGGGC
CAAGGAGGTGTCACTAAGCTATTCAACTGGTGCACTTGCCAGTTGCATGGGCCTCATATACAACAGGATGGG
AACAGTGACCACAGAGGCTGCTTTTGGTCTAGTGTGTGCCACCTGTGAGCAGATTGCTGATTCACAGCATCG
GTCTCACAGACAAATGGCTACTACCACCAATCCACTAATCAGGCATGAGAACAGAATGGTGCTGGCTAGCAC
TACGGCAAAGGCTATGGAACAGATGGCTGGATCGAGTGAACAAGCAGCGGAGGCCATGGAGGTTGCTAATCA
GACTAGGCAGATGGTACATGCAATGAGAACTATTGGGACTCATCCTAGCTCCAGTACTGGTCTGAAAGATGA
CCTTCTTGAAAATTTACAGGCCTACCAGAAGCGAATGGGAGTGCAGATGCAGCGATTCAAGTGATCCTCTCG
CCATTGCAGCAAATATCATTGGGATCTTGCACCTGATATTGTGGACTACTGATCGTCTTTTTTTCAAATGTA
TTTATCGTCGCTTTAAATACGGTTTGAAAAGAGGGCCTTCTACGGAAGGGGTGCCTGAGTCCATGAGGGAAG
AATATCAACAGGAACAGCAGAGTGCTGTGGATGTTGACGATGGTCATTTTGTCAACATAGAGCTAGAGTAA-
-------------------
>A/swine/Ohio/OH_18_6910/2018/1-982
-------------------------ATGAGTCTTCTAACCGAGGTCGAAACGTACGTTCTTTCTATCATACC
GTCAGGCCCCCTCAAAGCCGAGATCGCACAGAGACTGGAAAGTGTCTTTGCAGGAAAGAACACAGATCTTGA
GGCTCTCATGGAATGGCTAAAGACAAGACCAATCTTGTCACCTCTGACCAAGGGAATTTTAGGATTTGTGTT
CACGCTCACCGTGCCCAGTGAGCGAGGACTGCAGCGTAGACGCTTTGTCCAAAATGCCCTAAATGGGAATGG
GGACCCAAACAACATGGATAGAGCAGTTAAACTATACAAGAAGCTCAAAAGAGAAATAACGTTCCATGGGGC
CAAGGAGGTGTCACTAAGCTATTCAACTGGTGCACTTGCCAGTTGCATGGGCCTCATATACAACAGGATGGG
AACAGTGACCACAGAGGCTGCTTTCGGTCTAGTGTGTGCCACCTGTGAACAGATTGCTGATTCACAGCATCG
GTCTCACAGACAAATGGCTACTACCACCAATCCACTAATCAGGCATGAGAACAGAATGGTGCTGGCTAGCAC
TACGGCAAAGGCTATGGAACAGATGGCTGGATCGAGTGAACAAGCAGCGGAGGCCATGGAGGTTGCTAATCA
GACTAGGCAGATGGTACATGCAATGAGAACTATTGGGACTCATCCTAGCTCCAGTACTGGTCTGAAAGATGA
CCTTCTTGAAAATTTACAGGCCTATCAGAAGCGAATGGGAGTGCAGATGCAGCGATTCAAGTGATCCTCTCG
CCATTGCAGCAAATATCATTGGGATCTTGCACCTGATATTGTGGATTACTGATCGTCTTTTTTTCAAATGTA
TTTATCGTCGCTTCAAATACGGTTTGAAAAGAGGGCCTTCTACGGAAGGGGTGCCTGAGTCCATGAGGGAAG
AATATCAACAGGAACAGCAGAGTGCTGTGGATGTTGACGATGGTCATTTTGTCAACATAGAGCTAGGGTAA-
-------------------
>A/swine/Ohio/OH_18_7450/2018/1-982
-------------------------ATGAGTCTTCTAACCGAGGTCGAAACGTACGTTCTTTCTATCATACC
GTCAGGCCCCCTCAAAGCCGAGATCGCACAGAGACTGGAAAGTGTCTTTGCAGGAAAAAACACAGATCTTGA
GGCTCTCATGGAGTGGCTAAAGACAAGACCAATCTTGTCACCTCTGACTAAGGGAATTTTAGGATTTGTGTT
CACGCTCACCGTGCCCAGTGAGCGAGGACTGCAGCGTAGACGCTTTGTCCAAAATGCCCTAAATGGGAATGG
GGACCCAAACAACATGGATAGAGCAGTTAAACTATACAAGAAGCTCAAAAGAGAAATAACGTTCCATGGGGC
CAAGGAGGTGTCACTAAGCTATTCAACTGGTGCACTTGCCAGTTGCATGGGCCTCATATACAACAGGATGGG
AACAGTGACCACAGAGGCTGCTTTTGGTCTAGTGTGTGCCACCTGTGAGCAGATTGCTGATTCACAGCATCG
GTCTCACAGACAAATGGCTACTACCACCAATCCACTAATCAGGCATGAGAACAGAATGGTGCTGGCTAGCAC
TACGGCAAAGGCTATGGAACAGATGGCTGGATCAAGTGAACAAGCAGCGGAGGCCATGGAGGTTGCTAATCA
GACTAGGCAGATGGTACATGCAATGAGAACTATTGGGACTCATCCTAGCTCCAGTACTGGTCTGAAAGATGA
CCTTCTTGAAAATTTACAGGCCTACCAGAAGCGAATGGGAGTGCAGATGCAGCGATTCAAGTGATCCTCTCG
CCATWGCAGCAAATATCATTGGGATCTTGCACCTGATATTGTGGACTACTGATCGTCTTTTTTTCAAATGTA
TTTATCGTCGCTTTAAATACGGTTTGAAAAGAGGGCCTTCTACGGAAGGGGTGCCTGAGTCCATGAGGGAAG
AATATCAACAGGAACAGCAGAGTGCTGTGGATGTTGACGATGGTCATTTTGTCAACATAGAGCTAGAGTAA-
-------------------
>A/swine/Ohio/OH_18_7965/2018/1-982
-------------------------ATGAGTCTTCTAACCGAGGTCGAAACGTACGTTCTTTCTATCATACC
GTCAGGCCCCCTCAAAGCCGAGATCGCACAGAGACTGGAAAGTGTCTTTGCAGGAAAGAACACAGATCTTGA
GGCTCTCATGGAATGGCTAAAGACAAGACCAATCTTGTCACCTCTGACTAAGGGAATTTTAGGATTTGTGTT
CACGCTCACCGTGCCCAGTGAGCGAGGACTGCAGCGTAGACGCTTTGTCCAAAATGCCCTAAATGGGAATGG
GGACCCAAACAACATGGATAGAGCAGTTAAACTATACAAGAAGCTCAAAAGAGAAATAACGTTCCATGGGGC
CAAGGAGGTGTCACTAAGCTATTCAACTGGTGCACTTGCCAGTTGCATGGGCCTCATATACAACAGGATGGG
AACAGTGACCACAGAGGCTGCTTTCGGTCTAGTGTGTGCCACCTGTGAACAGATTGCTGATTCACAGCATCG
GTCTCACAGACAAATGGCTACTACCACCAATCCACTAATCAGGCATGAGAACAGAATGGTGCTGGCTAGCAC
TACGGCAAAGGCTATGGAACAGATGGCTGGATCGAGTGAACAAGCAGCGGAGGCCATGGAGGTTGCTAATCA
GACTAGGCAGATGGTACATGCAATGAGAACTATTGGGACTCATCCTAGCTCCAGTACTGGTCTGAAAGATGA
CCTTCTTGAAAATTTACAGGCCTATCAGAAGCGAATGGGAGTGCAGATGCAGCGATTCAAGTGATCCTCTCG
CCATTGCAGCAAATATCATTGGGATCTTGCACCTGATATTGTGGATTACTGATCGTCTTTTTTTCAAATGTA
TTTATCGTCGCTTCAAATACGGTTTGAAAAGAGGGCCTTCTACGGAAGGGGTGCCTGAGTCCATGAGGGAAG
AATATCAACAGGAACAGCAGAGTGCTGTGGATGTTGACGATGGTCATTTTGTCAACATAGAGCTAGAGTAA-
-------------------
>A/swine/Kansas/A01378039/2018/1-1002
-------------------------ATGAGTCTTCTAACCGAGGTCGAAACGTACGTTCTTTCTATCGTCCC
GTCAGGCCCCCTCAAAGCCGAGATCGCGCAGAGACTGGAAAGTGTCTTTGCAGGAAAGAACACAGATCTTGA
GGCTCTAATGGAATGGCTAAAGACAAGACCAATCTTGTCACCTCTGACTAAGGGAATTTTAGGGTTTGTGTT
CACGCTCACCGTGCCCAGTGAGCGAGGACTGCAGCGTAGACGCTTTGTCCAAAATGCCCTAAATGGGAACGG
GGACCCGAACAACATGGATAGAGCAGTTAAACTATACAAGAAGCTCAAAAGAGAAATAACGTTCCATGGGGC
CAAGGAGGTGTCGCTAAGCTATTCAACTGGTGCACTTGCCAGTTGCATGGGCCTCATATACAACAGGATGGG
AACAGTGACCACAGAAGCTGCTTTTGGCCTAGTGTGTGCCACTTGTGAACAGATTGCTGATTCACAGCATCG
GTCCCACAGACAAATGGTTACTACTACCAATCCATTAATCAGGCATGAAAACAGAATGGTCCTGGCTAGCAC
TACGGCAAAGGCTATGGAACAGATGGCTGGATCGAGTGAACAGGCAGCAGAGGCCATGGAGGTTGCTAATCA
GACTAGGCAGATGGTACATGCAATGAGAACTATTGGTACTCATCCTAGCTCCAGTGCTGGTCTGAAAGATGA
CCTCCTTGAAAATTTGCAGGCCTACCAGAAGCGAATGGGAGTGCAGATGCAGCGATTCAAGTGATACTCTCG
CCATTGCAGCAAATATCATTGGGATCTTGCACCTGATATTGTGGATTACTGATCGTCTTTTTTTCAAATGCA
TTTATCGTCGATTTAAATACGGTTTGAAAAGAGGGCCTTCTACGGAAGGAGTGCCTGAGTCCATGAGGGAAG
AATATCAACAGGAACAGCAGAGTGCTGTGGATGTTGACGATGGTCATTTTGTCAACATAGAGCTAGAGTAAA
AAACTACCTTGTTTCTACT
>A/swine/Iowa/A02136744/2017/1-982
-------------------------ATGAGTCTTCTAACCGAGGTCGAAACGTACGTTCTTTCTATCATACC
GTCAGGCCCCCTCAAAGCCGAGATTGCGCAGAGACTGGAAAGTGTCTTTGCAGGAAAGAATACAGACCTTGA
GGCTCTCATGGAATGGCTAAAGACAAGACCAATCTTGTCACCTTTGACTAAGGGAATTTTAGGATTTGTGTT
CACGCTCACCGTGCCCAGTGAGCGAGGACTGCAGCGTAGACGCTTTGTCCAAAATGCCCTGAATGGGAATGG
GGACCCAAACAACATGGATAGAGCAGTTAAACTATACAAGAAGCTCAAAAGAGAAATAACGTTCCATGGGGC
CAAGGAGGTGTCACTAAGCTATTCAACTGGTGCACTTGCCAGTTGCATGGGCCTCATATACAACAGGATGGG
AACAGTGACCACAGAAGCTGCTTTTGGTCTAGTGTGTGCCACTTGTGAACAAATTGCTGATTCACAGCATCG
GTCTCACAGACAGATGGCCACAACCACCAATCCACTAATCAGGCATGAGAACAGAATGGTGCTGGCTAGCAC
TACGGCAAAGGCTATGGAACAGATGGCTGGATCGAGTGAACAGGCAGCGGAGGCCATGGAGGTTGCTAATCA
GACTAGACAGATGGTACATGCAATGAGAACTATCGGGACTCATCCTAGTTCCAGTACTGGTCTGAAAGATGA
CCTTCTTGAAAATTTGCAGGCCTATCAGAAGCGAATGGGAGTGCAGATGCAGCGGTTTAAGTGATCCTCTCG
CCATTGCAGCTAATATCATTGGGATCTTGCACCTGATATTGTGGATTACTGATCGTCTTTTTTTCAAATGTA
TTTATCGTCGCTTTAAATACGGTTTGAAAAGAGGGCCTTCTACGGAAGGAGTGCCTGAGTCCATGAGGGAAG
AATATCAACAGGAACAGCAGAGTGCTGTGGATGTTGACGATGGTCATTTTGTCAACATAGAGCTGGAGTAA-
-------------------
>A/swine/Kansas/A01378040/2018/1-992
---------------ATGTTTAAAGATGAGTCTTCTAACCGAGGTCGAAACGTACGTTCTTTCTATCGTCCC
GTCAGGCCCCCTCAAAGCCGAGATCGCGCAGAGACTGGAAAGTGTCTTTGCAGGAAAGAACACAGATCTTGA
GGCTCTAATGGAATGGCTAAAGACAAGACCAATCTTGTCACCTCTGACTAAGGGAATTTTAGGGTTTGTGTT
CACGCTCACCGTGCCCAGTGAGCGAGGACTGCAGCGTAGACGCTTTGTCCAAAATGCCCTAAATGGGAACGG
GGACCCGAACAACATGGATAGAGCAGTTAAACTATACAAGAAGCTCAAAAGAGAAATAACGTTCCATGGGGC
CAAGGAGGTGTCACTAAGCTATTCAACTGGTGCACTTGCCAGTTGCATGGGCCTCATATACAACAGGATGGG
AACAGTGACCACAGAAGCTGCTTTTGGCCTAGTGTGTGCCACTTGTGAACAGATTGCTGATTCACAGCATCG
GTCCCACAGACAAATGGTTACTACTACCAATCCATTAATCAGGCATGAAAACAGAATGGTCCTGGCTAGCAC
TACGGCAAAGGCTATGGAACAGATGGCTGGATCGAGTGAACAGGCAGCAGAGGCCATGGAGGTTGCTAATCA
GACTAGGCAGATGGTACATGCAATGAGAACTATTGGTACTCATCCTAGCTCCAGTGCTGGTCTGAAAGATGA
CCTCCTTGAAAATTTGCAGGCCTACCAGAAGCGAATGGGAGTGCAGATGCAGCGATTCAAGTGATACTCTCG
CCATTGCAGCAAATATCATTGGGATCTTGCACCTGATATTGTGGATTACTGATCGTCTTTTTTTCAAATGCA
TTTATCGTCGATTTAAATACGGTTTGAAAAGAGGGCCTTCTACGGAAGGAGTGCCTGAGTCCATGAGGGAAG
AATATCAACAGGAACAGCAGAGTGCTGTGGATGTTGACGATGGTCATTTTGTCAACATAGAGCTAGAGTAA-
-------------------
>A/swine/North_Carolina/A02138766/2017/1-982
-------------------------ATGAGTCTTCTAACCGAGGTCGAAACGTACGTTCTGTCTATCATCCC
GTCAGGCCCCCTCAAAGCCGAGATCGCGCAGAGACTGGAAAGTGTCTTTGCAGGAAAGAACACAGATCTTGA
GGCCCTCATGGAGTGGCTAAAGACAAGACCAATCTTGTCACCTCTGACTAAGGGAATTTTAGGATTTGTGTT
TACGCTCACCGTGCCCAGTGAGCGAGGACTGCAGCGTAGACGCTTTGTCCAAAATGCCCTGAATGGAAATGG
GGACCCAAACAACATGGATAGAGCAGTTAAACTATACAAGAAGCTCAAAAGAGAAATAACGTTCCATGGGGC
AAAGGAGGTGTCACTTAGCTATTCAACTGGTGCACTTGCCAGTTGCATGGGCCTCATATACAACAGGATGGG
AACAGTGACCACAGAAGCTGCCTTTGGTCTAGTGTGTGCCACTTGTGAACAGATTGCTGATTCACAGCATCG
GTCTCACAGACAGATGGCCACTACCACCAATCCACTAATCAGACATGAGAACAGAATGGTGCTGGCTAGCAC
TACAGCAAAGGCTATGGAACAGATGGCTGGATCAAGTGAACAGGCAGCGGAGGCCATGGAGGTTGCTAATCA
GACTAGGCAGATGGTACATGCAATGAGAACTATTGGGACTCATCCTAGCTCCAGTACTGGTCTGAAAGATGA
CCTTCTTGAAAATTTGCAGGCCTACCAGAAGCGAATGGGAGTGCAGATGCAGCGATTCAAGTGATCTTCTCG
CCATTGCAGCCAATATCATTGGGATCTTGCACCTGATATTGTGGATTACTGATCGTCTTTTTTTCAAATGCA
TTTATCGTCGCTTTAAATACGGTTTGAAAAGAGGGCCTTCTACGGAAGGAGTGCCTGAGTCCATGAGGGAAG
AATATCAACAGGAACAGCAGAGTGCTGTGGATGTTGACGATGGTCATTTTGTCAACATAGAGCTAGAGTAA-
-------------------
>A/swine/Tennessee/A02139128/2017/1-982
-------------------------ATGAGTCTTCTAACCGAGGTCGAAACGTACGTTCTTTCTATCATCCC
GTCAGGCTCCCTCAAAGCCGAGATCGCGCAGAGACTGGAAAGTGTTTTCTCAGGAAAGAGCGCAGATCTTGA
GGCTCTCATGGAATGGCTAAAGACAAGACCAATCTTGTCACCTCTGACTAAGGGGATTTTAGGATTTGTGTT
CACGCTCACCGTGCCCAGTGAGCGAGGACTGCAGCGTAGACGCTTTGTCCAAAATGCCCTAAATGGGAATGG
GGACCCGAACAACATGGATAGAGCAGTTAAACTATACAAGAAGCTCAAAAGAGAAATAACGTTCCATGGGGC
CAAGGAGGTGTCACTAAGCTATTCAACTGGTGCACTTGCCAGTTGCATGGGCCTCATATACAACAGAATGGG
AACAGTGACCACAGAAGCTGCTTTTGGTCTAGTGTGTGCCACTTGTGAACAGATTGCTGATTCACAGCATCG
GTCTCACAGACAAATGGCTATTACCACCAATCCACTAATCAGGCATGAAAACAGAATGGTGCTGGCTAGCAC
TACGGCAAAGGCTATGGAACAGATGGCTGGATCGAGTGAACAGGCAGCAGAGGCCATGGAGGTTGCTAATCA
AACTAGGCAGATGGTACATGCAATGAGAACCATTGGGACTCATCCTAGCTCCAGTGCTGGTCTGAAAGATGA
CCTTCTTGAAAATTTGCAGGCCTACCAGAAGCGAATGGGAGTGCAGATGCAGCGATTCAAATGATCCTCTCG
TCATTGCAGCAAATATCATTGGGATCTTGCACCTGATATTGTGGATTACTGATCGTCTTTTCTTCAAATGTA
TTTATCGTCGCTTTAAATACGGTTTGAAAAGAGGGCCTTCTACGGAAGGAGTGCCTGAGTCCATGAGGGAAG
AATATCAACAGGAACAGCAGAGTGCTGTGGATGTTGACGATGGTCATTTTGTCAACATAGAGCTAGAGTAA-
-------------------
>A/swine/North_Carolina/A02137329/2017/1-982
-------------------------ATGAGTCTTCTAACCGAGGTCGAAACGTACGTTCTTTCTATCATCCC
GTCAGGCTCCCTCAAAGCCGAGATCGCGCAGAGACTGGAAAGTGTTTTTTCAGGAAAGAACACAGATCTTGA
GGCTCTCATGGAATGGCTAAAGACAAGACCAATCTTGTCACCTCTGACTAAGGGGATTTTAGGATTTGTGTT
CACGCTCACCGTGCCCAGCGAGCGAGGACTGCAGCGTAGACGCTTTGTCCAAAATGCCCTAAATGGGAATGG
GGACCCGAACAACATGGATAGAGCAGTTAAACTATACAAGAAGCTCAAAAGAGAAATAACGTTCCATGGGGC
CAAGGAGGTGTCACTAAGCTATTCAACTGGTGCACTTGCCAGTTGCATGGGCCTCATATACAACAGGATGGG
AACAGTGACCACAGAAGCTGCCTTTGGTCTGGTGTGTGCCACTTGTGAACAGATTGCTGATTCACAGCATCG
GTCTCACAGACAAATGGCTACTACCACCAATCCACTAATCAGACATGAAAACAGAATGGTGCTGGCTAGCAC
TACGGCAAAGGCTATGGAACAAATGGCTGGATCGAGTGAACAGGCAGCAGAGGCCATGGAGGTTGCTAATCA
AACTAGGCAGATGGTACATGCAATGAGAACTATTGGGACTCACCCTAGCTCCAGTGCTGGTCTGAAAGATGA
CCTTCTTGAAAATTTGCAGGCCTACCAGAAGCGAATGGGAGTGCAGATGCAGCGATTCAAGTGACCCTCTCG
TCATCGCAGCAAATATCATTGGGATCTTGCACCTGATATTGTGGATTACTGATCGTCTTTTTTTCAAATGTA
TTTATCGTCGCTTTAAATACGGTTTGAAAAGAGGGCCTTCTACGGAAGGAGTGCCTGAGTCCATGAGGGAAG
AATATCAACAGGAACAGCAGAGTGCTGTGGATGTTGACGATGGTCATTTTGTCAACATAGAGCTAGAGTAA-
-------------------
>A/swine/Pennsylvania/A02138663/2017/1-982
-------------------------ATGAGTCTTCTGACCGAGGTCGAAACGTACGTTCTGTCTATCATCCC
GTCAGGCCCCCTCAAAGCCGAGATTGCGCAGAGACTGGAAAGTGTCTTTGCAGGGAAGAACACAGATCTTGA
GGCCCTCATGGAATGGCTAAAGACAAGACCAATCTTGTCACCTCTGACTAAGGGAATTTTAGGATTTGTGTT
CACGCTCACCGTGCCCAGTGAGCGAGGACTGCAGCGTAGACGCTTTGTCCAAAATGCCCTGAATGGAAATGG
GGACCCAAACAACATGGATAGAGCAGTTAAACTATACAAGAAGCTCAAAAGAGAAATAACGTTCCATGGGGC
AAAGGAGGTGTCACTTAGCTATTCAACTGGTGCACTTGCCAGTTGCATGGGCCTCATATACAACAGGATGGG
AACAGTGACCACAGAAGCTGCTTTTGGTCTAGTGTGTGCCACTTGTGAACAGATTGCTGATTCACAGCATCG
GTCTCACAGACAGATGGCTACTACCACCAATCCACTAATTAGGCATGAGAACAGAATGGTGCTGGCTAGCAC
TACAGCAAAGGCTATGGAACAGATGGCTGGATCGAGTGAACAGGCAGCGGAGGCCATGGAGGTTGCTAATCA
GACTAGGCAGATGGTACATGCAATGAGAACTATTGGGACTCATCCTAGCTCCAGTACTGGTCTGAAAGATGA
CCTTCTTGAAAATTTGCAGGCCTACCAGAAGCGAATGGGAGTGCAGATGCAGCGATTCAAGTGATCCTCTCG
CCATTGCAGCCAATATCATTGGGATCTTGCACCTGATATTGTGGATTACTGATCGTCTTTTTTTCAAATGCA
TTTATCGTCGCTTTAAATACGGTTTGAAAAGAGGGCCTTCTACGGAAGGAGTGCCTGAGTCCATGAGGGAAG
AATATCAACAGGAACAGCAGAATGCTGTGGATGTTGACGATGGTCATTTTGTCAACATAGAGCTAGAGTAA-
-------------------
>A/swine/South_Dakota/A01785387/2017/1-982
-------------------------ATGAGTCTTCTAACCGAGGTCGAAACGTACGTTCTTTCTATCGTCCC
GTCAGGCCCCCTCAAAGCCGAGATCGCGCAGAGACTGGAAAGTGTCTTTGCAGGAAAGAACACAGATCTTGA
GGCTCTAATGGAATGGCTAAAGACAAGACCAATCTTGTCACCTCTGACTAAGGGAATTTTAGGGTTTGTGTT
CACGCTCACCGTGCCCAGTGAGCGAGGACTGCAGCGTAGACGCTTTGTCCAAAATGCCCTAAATGGAAATGG
GGACCCGAACAACATGGATAGAGCAGTTAAACTATACAAGAAGCTCAAAAGAGAAATAACGTTCCATGGGGC
CAAGGAGGTGTCGCTAAGCTATTCAACTGGTGCACTTGCCAGTTGCATGGGCCTCATATACAACAGGATGGG
AACAGTGACCACAGAAGCTGCTTTTGGCCTAGTGTGTGCCACTTGTGAACAGATTGCTGATTCACAGCATCG
GTCCCACAGACAAATGGTTACTACTACCAATCCATTAATCAGGCATGAAAACAGAATGGTCCTGGCTAGCAC
TACGGCAAAGGCTATGGAACAGATGGCTGGATCGAGTGAACAGGCAGCAGAGGCCATGGAGGTTGCTAATCA
GACTAGGCAGATGGTACATGCAATGAGAACTATTGGTACTCATCCTAGCTCCAGTGCTGGTCTGAAAGATGA
CCTCCTTGAAAATTTGCAGGCCTACCAGAAGCGAATGGGAGTGCAGATGCAGCGATTCAAGTGATACTCTCG
CCATTGCAGCAAATATCATTGGGATCTTGCACCTGATATTGTGGATTACTGATCGTCTTTTTTTCAAATGCA
TTTATCGTCGATTTAAATACGGTTTGAAAAGAGGGCCTTCTACGGAAGGAGTGCCTGAGTCCATGAGGGAAG
AATATCAACAGGAACAGCAGAGTGCTGTGGATGTTGACGATGGTCATTTTGTCAACATAGAGCTAGAGTAA-
-------------------
>A/swine/Minnesota/A01678531/2017/1-982
-------------------------ATGAGTCTTCTAACCGAGGTCGAAACGTACGTTCTTTCTATCATCCC
GTCAGGCCCCCTCAAAGCCGAGATCGCGCAGAGACTGGAAAGTGTATTTGCAGGAAAGAACACAGATCTTGA
GGCTCTCATGGAATGGCTAAAGACAAGACCAATCTTGTCACCTCTGACTAAGGGAATTTTAGGATTTGTGTT
CACGCTCACCGTGCCCAGTGAGCGAGGACTGCAGCGTAGACGCTTTGTCCAAAATGCCCTAAATGGGAATGG
GGACCCGAACAACATGGATAGAGCAGTTAAACTATACAAGAAGCTCAAAAGAGAAATAACGTTCCATGGGGC
CAAGGAGGTGTCACTAAGCTATTCAACTGGTGCACTTGCCAGTTGCATGGGCCTCATATACAACAGGATGGG
AACAGTGACCACAGAAGCTGCTTTTGGTCTAGTGTGTGCCACCTGTGAACAGATTGCTGATTCACAGCATCG
ATCTCACAGACAAATGGTTACTACCACCAATCCACTAATCAGGCATGAGAACAGAATGGTGCTGGCTAGCAC
TACTGCAAAGGCTATGGAACAGATGGCTGGATCGAGTGAACAGGCAGCAGAGGCCATGGAGGTTGCTAATCA
GACTAGGCAGATGGTACATGCAATGAGAACTATTGGGACTCATCCTAGCTCCAGTGCTGGTCTGAAGGATGA
CCTTCTTGAAAATTTACAGGCCTACCAGAAGCGAATGGGAGTGCAAATGCAGCGATTCAAGTGATCCTCTCG
TCATTGCAGCAAATATCATTGGGATCTTGCACCTGATATTGTGGATTACTGATCGTCTTTTTTTCAAATGTA
TTTATCGTCGCTTTAAATACGGTTTGAAAAGAGGGCCTCCTACGGAAGGAGTGCCTGAGTCCATGAGGGAAG
AATATCAACAGGAACAGCAGAGTGCTGTGGATGTTGACGATGGTCATTTTGTCAACATAGAGCTAGAGTAA-
-------------------
>A/swine/Texas/A01785377/2017/1-982
-------------------------ATGAGTCTTCTAACCGAGGTCGAAACGTACGTTCTTTCTATCATCCC
GTCAGGCCCCCTCAAAGCCGAGATCGCGCAGAGACTGGAAAGTGTATTTGCAGGAAAGAACACAGATCTTGA
GGCTCTCATGGAATGGCTAAAGACAAGACCAATCTTGTCACCTCTGACTAAGGGAATTTTAGGATTTGTGTT
CACGCTCACCGTGCCCAGTGAGCGAGGACTGCAGCGTAGACGCTTTGTCCAAAATGCCCTAAATGGGAATGG
GGACCCGAACAACATGGATAGAGCAGTTAAATTATACAAGAAGCTCAAAAGAGAAATAACGTTCCATGGGGC
TAAAGAGGTGTCACTAAGCTATTCAACTGGTGCACTTGCCAGTTGCCTGGGCCTCATATACAACAGGATGGG
AACAGTGACCACAGAAGCTGCTTTTGGTCTAGTGTGTGCCACTTGTGAACAGATTGCTGATTCACAGCATCG
ATCTCACAGACAAATGGTTGCTACCACCAATCCACTAATCAGGCATGAAAACAGAATGGTGCTGGCTAGCAC
TACTGCAAAGGCTATGGAACAGATGGCTGGATCGAGTGAACAGGCAGCAGAGGCCATGGAGGTTGCTAATCA
GACTAGGCAGATGGTACATGCAATGAGGACTATTGGGACTCATCCTAGCTCCAGTGCTGGTCTGAAGGATGA
CCTTCTTGAAAATTTACAGGCCTACCAGAAGCGAATGGGAGTGCAAATGCAGCGATTCAAGTGATCCTCTCG
TCATTGCAGCAAATATCATTGGGATCTTGCACCTGATATTGTGGATTATTGATCGTCTTTTTTTCAAATGTA
TTTATCGTCGCTTTAAATACGGTTTGAAAAGAGGGCCTCCTACAGAAGGAGTGCCTGAGTCCATGAGGGAAG
AATATCAACAGGAACAGCAGAGTGCTGTAGATGTTGACGATGGTCATTTTGTCAACATAGAGCTAGAGTAA-
-------------------
>A/swine/Iowa/A02139129/2017/1-982
-------------------------ATGAGTCTTCTAACCGAGGTCGAAACGTACGTTCTTTCTATCATACC
GTCAGGCCCCCTCAAAGCCGAGATTGCGCAGAGACTGGAAAGTGTCTTTGCAGGAAAGAATACAGACCTTGA
GGCTCTCATGGAATGGCTAAAGACAAGACCAATCTTGTCACCTTTGACTAAGGGAATTTTAGGATTTGTGTT
CACGCTCACCGTGCCCAGTGAGCGAGGACTGCAGCGTAGACGCTTTGTCCAAAATGCCCTGAATGGGAATGG
GGACCCAAACAACATGGACAGAGCAGTTAAACTATACAAGAAGCTCAAAAGAGAAATAACGTTCCATGGGGC
CAAGGAGGTGTCACTAAGCTATTCAACTGGTGCACTTGCCAGTTGCATGGGCATCATATACAACAGGATGGG
AACAGTGACCACAGAAGCTGCTTTTGGTCTAGTGTGTGCCACTTGTGAACAGATTGCTGATTCACAGCATCG
GTCTCACAGACAGATGGCTACCACCACCAATCCACTAATCAGGCATGAGAACAGAATGGTGCTGGCTAGCAC
TACGGCAAAGGCTATGGAACAGATGGCTGGATCGAGTGAACAGGCAGCGGAGGCCATGGAGGTTGCTAATCA
GACTAGGCAGATGGTGCATGCAATGAGAACTATTGGGACTCATCCTAGTTCCAGTACTGGTCTGAAAGATGA
CCTTCTTGAAAATTTGCAGGCCTATCAGAAGCGAATGGGAGTGCAGATGCAGCGGTTTAAGTGATCCTCTCG
CCATTGCAGCAAATATCATTGGGATCTTGCACCTGATATTGTGGATTACTGATCGTCTTTTTTTCAAATGTA
TTTATCGTCGCTTTAAATACGGTTTGAAAAGAGGGCCTTCTACGGAAGGAGTGCCTGAGTCCATGAGGGAAG
AATATCAACAGGAACAGCAGAGTGCTGTGGATGTTGACGATGGTCATTTTGTCAACATAGAGCTGGAGTAA-
-------------------
>A/swine/Arkansas/A02139135/2017/1-982
-------------------------ATGAGTCTTCTAACCGAGGTCGAAACGTACGTTCTTTCTATCATCCC
GTCAGGCCCCCTCAAAGCCGAGATCGCACAGAGACTGGAAAGTGTCTTTGCAGGAAAGAACACAGATCTTGA
GGCCCTCATGGAATGGCTAAAGACAAGACCAATCTTGTCACCTCTGACTAAGGGGATTTTAGGATTTGTGTT
CACGCTCACCGTGCCCAGTGAGCGAGGACTGCAGCGTAGACGCTTTGTCCAAAATGCCCTAAATGGAAATGG
GGACCCGAACAACATGGATAGAGCAGTTAAGCTATACAAGAAGCTCAAAAGAGAAATAACATTCCATGGGGC
CAAGGAGGTGTCACTAAGCTATTCAACTGGTGCACTTGCCAGTTGCCTGGGCCTCATATACAACAGGATGGG
AACAGTTACCACAGAAGCTGCTTTCGGTCTAGTGTGTGCCACTTGTGAACAGATTGCTGATTCACAGCATCG
GTCTCACAGACAAATGGCTACTACCACCAATCCACTGATCAGGCATGAAAACAGGATGGTGCTGGCTAGCAC
TACGGCAAAGGCTATGGAACAGATGGCTGGATCGAGTGAGCAGGCAGCAGAGGCCATGGAGGTTGCTAATAA
GACTAGGCAGATGGTACATGCAATGAGAACTATTGGGACTCATCCTAGCTCCAGTGCCGGTCTGAAAGATGA
TCTTCTTGAAAATTTGCAGGCCTACCAGAAGCGAATGGGAGTGCAAATGCAGCGATTCAAATGATCCTCTCG
TCATTGCAGCAAATATCATTGGGATCTTGCACCTGATATTGTGGATTTCTGATCGTCTTTTTTTCAAATGTG
TTTATCGTCACTTTAAATACGGTTTGAAAAGAGGGCCTTCTACAGAAGGAGTGCCTGAGTCTATGAGGGAAG
AATATCAACAGGAACAGCAGAGTTCTGTGGATGTTGACGATGGTCATTTTGTCAACATAGAGCTAGAGTAA-
-------------------
>A/swine/Nebraska/A02139134/2017/1-982
-------------------------ATGAGTCTTCTAACCGAGGTCGAAACGTACGTTCTTTCTATCATCCC
GTCAGGCCCCCTCAAAGCCGAGATCGCGCAGAGACTGGAAAGTGTCTTTGCAGGAAAGAACACAGATCTTGA
GGCTCTCATGGAATGGCTAAAGACAAGACCAATCTTGTCACCTCTGACTAAGGGAATTTTAGGATTTGTGTT
CACGCTCACCGTGCCCAGTGAGCGAGGACTGCAGCGTAGACGCTTTGTCCAAAATGCCCTAAATGGAAATGG
GGACCCCAACAACATGGATAGAGCAGTTAAACTATACAAGAAGCTCAAAAGAGAAATAACGTTCCATGGGGC
TAAGGAGGTGTCACTAAGCTATTCAACTGGTGCACTTGCCAGTTGCATGGGCCTCATATACAACAGGATGGG
AACAGTGACCACAGAAGCTGCTTTTGGTCTAGTGTGTGCCACCTGTGAACAGATTGCTGATTCACAGCATCG
GTCTCACAGACAAATGGCTACAACCACCAATCCACTAATCAGGCATGAAAATAGAATGGTGCTGGCTAGCAC
TACTGCAAAGGCTATGGAACAGATGGCTGGATCGAGTGAACAGGCAGCAGAGGCCATGGAGGTTGCTAATCA
GACTAGGCAGATGGTACATGCAATGAGAACTATTGGGACTCATCCTAGCTCCAGTGCTGGTCTGAAAGATGA
CCTTCTTGAAAATTTACAGGCCTATCAGAAGCGAATGGGAGTGCAAATGCAGCGATTCAAGTGATCCTCTCG
CCATTGCAGCAAATATCATTGGGATCTTGCACTTGATATTGTGGATTACTGATCGTCTTTTTTTCAAATATA
TTTACCGTCGCTTTAAATACGGTTTGAAAAGAGGGCCTTCTACAGAAGGAGTGCCTGAGTCCATGAGGGAAG
AATATCAACAGGAACAGCAGAGTGCTGTGGATGTTGACGATGGTCATTTTGTCAACATAGAGCTAGAGTAA-
-------------------
>A/swine/Iowa/A02138601/2017/1-982
-------------------------ATGAGTCTTCTAACCGAGGTCGAAACGTACGTTCTTTCTATCGTCCC
GTCAGGCCCCCTCAAAGCCGAGATCGCGCAGAGACTGGAAAGTGTCTTTGCAGGAAAGAACACAGATCTTGA
GGCTCTAATGGAATGGCTAAAGACAAGACCAATCTTGTCACCTCTGACTAAGGGAATTTTAGGGTTTGTGTT
CACGCTCACCGTGCCCAGTGAGCGAGGACTGCAGCGTAGACGCTTTGTCCAAAATGCCCTAAATGGGAACGG
GGACCCGAACAACATGGATAGAGCAGTTAAACTATACAAGAAGCTCAAAAGAGAAATAACGTTCCATGGGGC
CAAGGAGGTGTCGCTAAGCTATTCAACTGGTGCACTTGCCAGTTGCATGGGCCTCATATACAACAGGATGGG
AACAGTGACCACAGAAGCTGCTTTTGGCCTAGTGTGTGCCACTTGTGAACAGATTGCTGATTCACAGCATCG
GTCCCACAGACAAATGGTTACTACTACCAATCCATTAATCAGGCATGAAAACAGAATGGTCCTGGCTAGCAC
TACGGCAAAGGCTATGGAACAGATGGCTGGATCGAGTGAACAGGCAGCAGAGGCCATGGAGGTTGCTAATCA
GACTAGGCAGATGGTACATGCAATGAGAACTATTGGTACTCATCCTAGCTCCAGTGCTGGTCTGAAAGATGA
CCTCCTTGAAAATTTGCAGGCCTACCAGAAGCGAATGGGAGTGCAGATGCAGCGATTCAAGTGATACTCTCG
CCATTGCAGCAAATATCATTGGGATCTTGCACCTGATATTGTGGATTACTGATCGTCTTTTTTTCAAATGCA
TTTATCGTCGATTTAAATACGGTTTGAAAAGAGGGCCTTCTACGGAAGGAGTGCCTGAGTCCATGAGGGAAG
AATATCAACAGGAACAGCAGAGTGCTGTGGATGTTGACGATGGTCATTTTGTCAACATAGAGCTAGAGTAA-
-------------------
>A/swine/Iowa/A02139244/2017/1-982
-------------------------ATGAGTCTTCTAACCGAGGTCGAAACGTACGTTCTTTCTATCATCCC
GTCAGGCCCCCTCAAAGCCGAGATCGCGCAGAGACTGGAAAGTGTCTTTGCAGGAAAGAACACAGATCTTGA
AGCTCTCATGGAATGGCTAAAGACAAGACCAATCTTGTCACCTTTGACTAAGGGAATTTTAGGATTTGTGTT
CACGCTCACCGTGCCCAGTGAGCGAGGACTGCAGCGTAGACGCTTTGTCCAAAATGCCCTAAATGGGAATGG
GGACCCAAATAACATGGATAGAGCAGTCAAACTATACAAGAAGCTCAAAAGAGAAATAACGTTCCATGGAGC
CAAGGAGGTGTCACTAAGCTATTCAACTGGTGCACTTGCCAGTTGCATGGGCCTCATATATAACAGGATGGG
GACAGTAACCACAGAAGCTGCTTTTGGTCTAGTATGTGCCACCTGTGAACAGATTGCTGATTCACAGCATCG
GTCTCACAGACAAATGGCTACCACCACCAATCCACTAATCAGGCATGAAAACAGAATGGTGCTGGCTAGCAC
TACGGCAAAGGCTATGGAACAGATGGCTGGATCGAGTGAACAGGCAGCAGAGGCCATGGAGGTTGCTAATCA
GACTAGGCAGATGGTACATGCAATGAGGACTATTGGGACTCATCCTAGCTCCAGTGCTGGTCTGAAAGATGA
CCTTCTTGAAAACTTGCAGGCCTACCAGAAACGAATGGGAGTGCAGATGCAGCGATTCAAGTGATCCTCTCG
TCATTGCAGCAAATATCATTGGGATCTTGCACCTGATATTGTGGATTACAGATCGTCTTTTTTTCAAATGCA
TTTATCGTCGCTTTAAATACGGGTTGAAAAGAGGGCCTTCTACGGAAGGAGTGCCTGAGTCCATGAGGGAAG
AATATCAACAGGAACAGCAGAGTGCGGTGGATGTTGACGATGGTCATTTTGTCAACATAGAGCTAGAGTAA-
-------------------
>A/swine/Utah/A02138837/2017/1-982
-------------------------ATGAGTCTTCTGACCGAGGTCGAAACGTACGTTCTTTCTATCATCCC
GTCAGGCCCCCTCAAAGCCGAGATCGCGCAGAGACTGGAAAGTGTCTTTGCAGGAAAAAACACAGATCTTGA
GGCTCTCATGGAATGGCTAAAGACAAGACCAATCTTGTCACCTTTGACCAAGGGCATTTTGGGATTTGTGTT
CACGCTCACCGTGCCCAGTGAGCGAGGACTGCAGCGTAGACGCTTTGTCCAAAATGCCCTAAATGGGAATGG
GGACCCAAACAACATGGATAGAGCAGTTAAACTATACAAGAAGCTCAAAAGAGAAATAACGTTCCATGGGGC
CAAGGAGGTGTCACTAAGCTATTCAACTGGTGCACTTGCCAGTTGCATGGGCCTCATATACAACAGGATGGG
AACAGTAACCACAGAAGCTGCTTTTGGTTTAGTATGTGCCACTTGTGAACAGATAGCTGATTCACAGCATCG
GTCTCACAGACAAATGGCTACTACCACCAATCCACTAATCAGACATGAAAACAGAATGGTGCTGGCTAGCAC
TACGGCAAAGGCCATGGAGCAGATGGCTGGATCGAGTGAACAGGCAGCAGAGGCCATGGAGGTTGCTAATCA
GACTAGGCAGATGGTACATGCAATGAGAACTATTGGGACTCATCCTAGCTCCAGTGCTGGTCTGAAAGATGA
CCTTCTTGAAAATTTGCAGGCCTACCAGAAACGAATGGGAGTGCAGATGCAGCGATTCAAATGATCCTCTCG
TCATCGCAGCAAATATCATTGGGATCTTGCACCTGATATTGTGGATTACAGATCGTCTTTTTTTCAAATGCA
TTTATCGTCGCTTTAGATACGGGTTGAAAAGAGGGCCTTCTACGGAAGGAGTGCCTGAGTCCATGAGGGAAG
AATATCAACAGGAACAGCAGAGTGCGGTGGATGTTGACGATGGTCATTTTGTCAACATAGAGCTAGAGTAA-
-------------------
>A/swine/North_Carolina/A02138817/2017/1-982
-------------------------ATGAGTCTTCTAACCGAGGTCGAAACGTACGTTCTTTCTATCATACC
GTCAGGCCCCCTCAAAGCCGAGATCGCACAGAGACTGGAAAGTGTCTTTGCAGGAAAGAACACAGATCTTGA
GGTTCTCATGGAATGGCTAAAGACAAGACCAATCTTGTCACCTCTGACTAAGGGAATTTTAGGATTTGTGTT
CACGCTCACCGTGCCCAGTGAGCGAGGACTGCAGCGTAGACGCTTTGTCCAAAATGCCCTGAATGGGAATGG
GGACCCAAACAACATGGATAGAGCAGTTAAACTATACAAGAAGCTCAAAAGAGAAATAACGTTCCATGGGGC
CAAAGAGGTGTCATTAAGCTATTCAACTGGTGCACTTGCCAGTTGCATGGGCCTCATATACAACAGGATGGG
AACAGTGACCACAGAAGCTGCTTTTGGTCTAGTGTGTGCCACTTGTGAACAGATTGCTGATTCACAGCATCG
GTCACACAGACAAATGGCTACAACCACCAATCCACTAATCAGGCATGAGAACAGAATGGTGCTGGCTAGCAC
TACGGCAAAGGCTATGGAACAGATGGCTGGATCGAGTGAACAGGCAGCGGAGGCCATAGAGGTTGCTAATCA
GACTAGACAGATGGTACATGCAATGAGAACTATTGGGACTCATCCTAGCTCCAGTACTGGTCTGAAAGATGA
CCTTCTTGAAAATTTGCAGGCCTACCAGAAGCGAATGGGAGTGCAAATGCAGCGATTCAAGTGATCCTCTCG
CCATTGCAGCAAATATCATTGGGATCTTGCACCTGACATTGTGGATTACTGATCGTCTTTTTTTCAAATGTA
TTTATCGTCGCTTTAAATACGGTTTGAAAAGAGGGCCTTCTACGGAAGGAGTGCCTGAGTCCATGAGGGAAG
AATATCAACAGGAACAGCAGAGTGCTGTGGATGTTGACGATGGTCATTTTGCCAACATAGAGCTAGAGTAA-
-------------------
>A/swine/Arkansas/A01678528/2017/1-982
-------------------------ATGAGTCTTCTAACCGAGGTCGAAACGTACGTTCTTTCTATCATACC
GTCAGGCCCCCTCAAAGCCGAGATCGCGCAGAGACTGGAAAGTGTCTTTGCAGGAAAGAATACAGACCTTGA
GGCTCTCATGGAATGGCTAAAGACAAGACCAATCTTGTCACCTTTGACTAAGGGAATTTTAGGATTTGTGTT
CACGCTCACCGTGCCCAGTGAGCGAGGACTGCAGCGTAGACGCTTTGTCCAAAATGCCCTGAATGGGAATGG
GGACCCAAACAACATGGATAGAGCAGTTAAACTATACAAGAAGCTCAAAAGAGAAATAACGTTCCATGGGGC
CAAGGAGGTGTCACTAAGCTATTCAACTGGTGCACTTGCCAGTTGCATGGGCCTCATATACAACAGGATGGG
AACAGTGACCACAGAAGCTGCTTTTGGTCTAGTGTGTGCCACTTGTGAACAGATTGCTGACTCACAGCATCG
GTCTCACAGACAGATGGCTACAACCACCAATCCACTAATCAGGCATGAGAACAGAATGGTGCTGGCTAGCAC
TACGGCAAAGGCTATGGAACAGATGGCTGGATCGAGTGAACAGGCAGCGGAGGCCATGGAGGTTGCCAATCA
GACTAGGCAGATGGTACATGCAATGAGAACTATTGGGACCCATCCTAATTCCAGTACTGGTCTGAAAGATGA
CCTTCTTGAAAATTTGCAGGCCTATCAGAAACGAATGGGAGTGCAGATGCAGCGGTTTAAGTGATCCTCTCG
CCATTGCAGCAAATATCATTGGGATCTTGCACCTGATATTGTGGATTACTGATCGTCTTTTTTTCAAATGTA
TTTATCGTCGCATTAAATACGGTTTGAAAAGAGGGCCTTCTACGGAAGGAGTGCCTGAGTCCATGAGGGAAG
AATATCAACAGGAACAGCAGAGTGCTGTGGATGTTGACGATGGTCATTTTGTCAACATAGAGCTGGAGTAA-
-------------------
>A/swine/Oklahoma/A02138767/2017/1-982
-------------------------ATGAGTCTTCTAACCGAGGTCGAAACGTACGTTCTTTCTATCATCCC
ATCAGGCCCCCTCAAAGCCGAGATCGCGCAGAGACTGGAGAGTGTCTTTGCAGGAAAGAACACAGATCTTGA
GGCTCTCATGGAATGGCTAAAGACAAGACCAATCTTGTCACCTTTGACTAAGGGAATTTTAGGATTTGTGTT
CACGCTCACCGTGCCCAGTGAGCGAGGACTGCAGCGTAGACGCTTTGTCCAAAATGCCCTAAATGGGAATGG
GGACCCGAACAACATGGATAGAGCAGTCAAACTATACAAGAAGCTCAAAAGAGAAATAACGTTCCATGGGGC
CAAGGAAGTGTCACTAAGCTATTCAACTGGTGCACTTGCCAGTTGCATGGGTCTCATATATAATAGAATGGG
GACAGTGACCACAGAAGCTGCTTTTGGTCTAGTATGTGCCACTTGTGAACAGATTGCTGATTCACAGCATCG
GTCTCACAGACAAATGGCTACCACCACCAATCCACTAATCAGGCATGAAAACAGAATGGTGCTGGCTAGCAC
TACGGCAAAGGCTATGGAACAGATGGCTGGATCGAGTGAACAGGCAGCAGAGGCCATGGAGGTTGCTAATCA
GACTAGGCAGATGGTACATGCAATGAGGACTATTGGGACTCATCCTAGCTCCAGTGCTGGTCTGAAAGATGA
CCTTCTTGAAAATTTGCAGGCCTACCAGAAACGAATGGGAGTGCAGATGCAGCGATTCAAGTGATCCTATCG
CCATTGCAGCAAATATCATTGGAATCTTGCACCTGATATTGTGGATTACAGATCGTCTTTTTTTCAAATGCA
TTTATCGTCGCTTTAAATACGGGTTGAAAAGAGGGCCTTCTACGGAAGGAGTGCCTGAGTCCATGAGGGAAG
AATACCAACAGGAACAGCAGAGTGCGGTGGATGTTGACGATGGTCATTTTGTCAACATAGAGCTAGAGTAA-
-------------------
>A/swine/Missouri/A02137164/2017/1-982
-------------------------ATGAGTCTTCTAACCGAGGTCGAAACGTACGTTCTTTCTATCATACC
GTCAGGCCCCCTCAAAGCCGAGATCGCGCAGAGACTGGAAAGTGTCTTTGCAGGAAAAAACACAGATCTTGA
AGCTCTCATGGAATGGCTAAAGACAAGACCAATCTTGTCACCTCTGACTAAGGGAATTTTAGGATTTGTGTT
CACGCTCACCGTGCCCAGTGAGCGAGGACTGCAGCGTAGACGCTTTGTCCAAAATGCCCTGAATGGGAATGG
GGACCCAAACAACATGGATAGAGCAGTTAAACTATACAAGAAGCTCAAAAGAGAAATAACATTCCATGGGGC
CAAGGAGGTGTCACTAAGCTATTCAACTGGTGCACTTGCCAGTTGCATGGGCCTCATATACAACAGGATGGG
AACAGTGACCACAGAAGCTGCTTTTGGTCTAGTGTGTGCCACTTGTGAACAGATTGCTGATTCACAGCATCG
GTCTCACAGACAGATGGCTACAACCACCAATCCACTAATCAGGCATGAGAACAGAATGGTGCTGGCTAGTAC
TACGGCAAAGGCTATGGAACAGATGGCTGGATCGAGTGAACAGGCAGCGGAGGCCATGGAGGTTGCTAATCA
GACTAGGCAGATGGTACATGCAATGAGAACTATTGGGACTCATCCTAGCTCCAGTACTGGTCTGAAAGATGA
CCTTCTTGAAAATTTGCAGGCCTACCAGAAGCGAATGGGAGTGCAGATGCAGCGATTCAAGTGATCCTCTCG
CCATTGCAGCAAATATCATTGGGATCTTGCACCTGATATTGTGGATTGCTGATCGTCTTTTTTTCAAATGTA
TTTATCGTCGCTTTAAATACGGTTTGAAAAGAGGGCCTTCAACGGAAGGAGTGCCTGAGTCCATGAGGGAAG
AATACCAACAGGAACAGCAGAGTGCTGTGGATGTTGACGATGGTCATTTTGTCAACATAGAGCTAGAGTAA-
-------------------
>A/swine/Indiana/17TOSU1822/2017/1-1027
AGCAAAAGCAGGTAGATATTTAAAGATGAGTCTTCTAACCGAGGTCGAAACGTACGTTCTTTCTATCATCCC
GTCAGGCCCCCTCAAAGCCGAGATCGCGCAGAGACTGGAAAGTGTATTTGCAGGAAAGAACACAGATCTTGA
GGCTCTCATGGAATGGCTAAAGACAAGACCAATCTTGTCACCTCTGACTAAGGGAATTTTAGGATTTGTGTT
CACGCTCACCGTGCCCAGTGAGCGAGGACTGCAGCGTAGACGCTTTGTCCAAAATGCCCTAAATGGGAATGG
GGACCCGAACAACATGGATAGAGCAGTTAAACTATACAAGAAGCTCAAAAGAGAAATAACGTTCCATGGGGC
TAAAGAGGTGTCACTAAGCTATTCAACTGGTGCACTTGCCAGTTGCCTGGGCCTCATATACAACAGGATGGG
AACAGTGACCACAGAAGCTGCTTTTGGTCTAGTGTGTGCCACTTGTGAACAGATTGCTGATTCACAGCATCG
ATCTCACAGACAAATGGTTGCTACCACCAATCCACTAATCAGGCATGAAAACAGAATGGTGCTGGCTAGCAC
TACTGCAAAGGCTATGGAACAGATGGCTGGATCGAGTGAACAGGCAGCAGAGGCCATGGAGGTTGCTAATCA
GACTAGGCAGATGGTACATGCAATGAGGACTATTGGGACTCATCCTAGCTCCAGTGCTGGTCTGAAGGATGA
CCTTCTTGAAAATTTACAGGCCTACCAGAAGCGAATGGGAGTGCAAATGCAGCGATTCAAGTGATCCTCTCG
TCATTGCAGCAAATATCATTGGGATCTTGCACCTGATATTGTGGATTACTGATCGTCTTTTTTTCAAATGTA
TTTATCGTCGCTTTAAATACGGTTTGAAAAGAGGGCCTCCTACAGAAGGAGTGCCTGAGTCCATGAGGGAAG
AATATCAACAGGAACAGCAGAGTGCTGTAGATGTTGACGATGGTCATTTTGTCAACATAGAGCTAGAGTAAA
AAACTACCTTGTTTCTACT
>A/swine/Indiana/17TOSU1833/2017/1-1027
AGCAAAAGCAGGTAGATATTTAAAGATGAGTCTTCTAACCGAGGTCGAAACGTACGTTCTTTCTATCATACC
GTCAGGCCCCCTCAAAGCCGAGATTGCGCAGAGACTGGAAAGTGTCTTTGCAGGAAAGAATACAGACCTTGA
GGCTCTCATGGAATGGCTAAAGACAAGACCAATCTTGTCACCTTTGACTAAGGGAATTTTAGGATTTGTGTT
CACGCTCACCGTGCCCAGTGAGCGAGGACTGCAGCGTAGACGCTTTGTCCAAAATGCCCTGAATGGGAATGG
GGACCCAAACAACATGGATAGAGCAGTTAAACTATACAAGAAGCTCAAAAGAGAAATAACGTTCCATGGGGC
CAAGGAGGTGTCACTAAGCTATTCAACTGGTGCACTTGCCAGTTGCATGGGCCTCATATACAACAGGATGGG
AACAGTGACCACAGAAGCTGCTTTTGGTCTAGTGTGTGCCACTTGTGAACAGATTGCTGATTCACAGCATCG
GTCTCACAGACAGATGGCTACAACCACCAATCCACTAATCAGGCATGAGAACAGAATGGTGCTGGCTAGCAC
TACGGCAAAGGCTATGGAACAGATGGCTGGATCAAGTGAACAGGCAGCGGAGGCCATGGAGATTGCTAATCA
GACTAGGCAGATGGTACATGCAATGAGAACTATTGGGACTCATCCTAGTTCCAGTACTGGTCTGAAAGATGA
CCTTCTTGAAAATTTGCAGGCCTATCAGAAACGAATGGGAGTGCAGATGCAGCGGTTTAAGTGATCCACTCG
CCATTGCAGCAAATATCATCGGGATCTTGCACCTGATATTGTGGATTACTGATCGTCTTTTTTTCAAATGTA
TTTATCGTCGCTTTAAATACGGTTTGAAAAGAGGGCCTTCTACGGAAGGAGTGCCTGAGTCCATGAGGGAAG
AATATCAACAGGAACAGCAGAGTGCTGTGGATGTTGACGATGGTCATTTTGTCAACATAGAGCTGGAGTAAA
AAACTACCTTGTTTCTACT
>A/swine/Nebraska/A02140873/2018/1-982
-------------------------ATGAGTCTTCTAACCGAGGTCGAAACGTACGTTCTTTCTATCATACC
GTCAGGCCCCCTCAAAGCCGAGATTGCGCAGAGACTGGAAAGTGTCTTTGCAGGAAAGAATACAGACCTTGA
GGCTCTCATGGAATGGCTAAAGACAAGACCAATCTTGTCACCTTTGACTAAGGGAATTTTAGGATTTGTGTT
CACGCTCACCGTGCCCAGTGAGCGAGGACTGCAGCGTAGACGCTTTGTCCAAAATGCCCTGAATGGGAATGG
GGACCCAAACAACATGGATAGAGCAGTTAAACTATACAAGAAGCTCAAAAGAGAAATAACGTTCCATGGGGC
CAAGGAGGTGTCACTAAGCTATTCAACTGGTGCACTTGCCAGTTGCATGGGCCTCATATACAACAGGATGGG
AACAGTGACCACAGAAGCTGCTTTTGGTCTAGTGTGTGCCACTTGTGAACAGATTGCTGATTCACAGCATCG
ATCTCACAGACAGATGGCTACAACCACCAATCCACTAATCAGGCATGAGAACAGAATGGTGCTGGCTAGCAC
TACGGCAAAGGCTATGGAACAGATGGCTGGATCAAGTGAACAGGCAGCGGAGGCCATGGAGATTGCTAATCA
GACTAGGCAGATGGTACATGCAATGAGAACTATTGGGACTCATCCTAGTTCCAGTACTGGTCTGAAAGATGA
CCTTCTTGAAAATTTGCAGGCCTATCAGAAACGAATGGGAGTGCAGATGCAGCGGTTTAAGTGATCCACTCG
CCATTGCAGCAAATATCATCGGGATCTTGCACCTGATATTGTGGATTACTGATCGTCTTTTTTTCAAATGTA
TTTATCGTCGCTTTAAATACGGTTTGAAAAGAGGGCCTTCTACGGAAGGAGTGCCTAAGTCCATGAGGGAAG
AATATCAACAGGAACAGCAGAGTGCTGTGGATGTTGACGATGGTCATTTTGTCAACATAGAGCTGGAGTAA-
-------------------
>A/swine/Utah/A02139205/2018/1-982
-------------------------ATGAGTCTTCTGACCGAGGTCGAAACGTACGTTCTTTCTATCATCCC
GTCAGGCCCCCTCAAAGCCGAGATCGCGCAGAGACTGGAAAGTGTCTTTGCAGGAAAGAACACAGATCTTGA
GGCTCTCATGGAATGGCTAAAGACAAGACCAATCTTGTCACCTTTGACCAAGGGCATTTTGGGATTTGTGTT
CACGCTCACCGTGCCCAGTGAGCGAGGACTGCAGCGTAGACGCTTTGTCCAAAATGCCCTAAATGGGAATGG
GGACCCAAACAACATGGATAGAGCAGTTAAACTATACAAGAAGCTCAAAAGAGAAATAACGTTCCATGGGGC
CAAGGAGGTGTCACTAAGCTATTCAACTGGTGCACTTGCCAGTTGCATGGGCCTCATATACAACAGGATGGG
AACAGTAACCACAGAAGCTGCTTTTGGTTTAGTATGTGCCACTTGTGAACAGATAGCTGATTCACAGCATCG
GTCTCACAGACAAATGGCTACTACCACCAATCCACTAATCAGACATGAAAACAGAATGGTGCTGGCTAGCAC
TACGGCAAAGGCCATGGAACAGATGGCTGGATCGAGTGAACAGGCAGCAGAGGCCATGGAGGTTGCTAATCA
GACTAGGCAGATGGTACATGCAATGAGAACTGTTGGGACTCACCCTAGCTCCAGTGCTGGTCTGAAAGATGA
CCTTCTTGAAAATTTGCAGGCCTACCAGAAACGAATGGGAGTGCAGATGCAGCGATTCAAGTGATCCTCTCG
TCATCGCAGCAAATATCATTGGGATCTTGCACCTGATATTGTGGATTACAGATCGTCTTTTTTTCAAATGCA
TTTATCGTCGCTTTAGATACGGGTTGAAAAGAGGGCCTTCTACGGAAGGAGTGCCTGAGTCCATGAGGGAAG
AATATCAACAGGAACAGCAGAGTGCGGTGGATGTTGACGATGGTCATTTTGTCAACATAGAGCTAGAGTAA-
-------------------
>A/swine/North_Carolina/A02140663/2018/1-982
-------------------------ATGAGTCTTCTAACCGAGGTCGAAACGTACGTTCTTTCTATCATACC
GTCAGGCCCCCTCAAAGCCGAGATCGCGCAGAGACTGGAAAGTGTCTTTGCAGGAAAGAACACAGATCTTGA
AGCTCTCATGGAATGGCTAAAGACAAGACCAATCTTGTCACCTCTGACTAAGGGAATTTTAGGATTTGTATT
CACGCTCACCGTGCCCAGTGAGCGAGGACTGCAGCGTAGACGCTTTGTCCAAAATGCCCTGAATGGGAATGG
GGACCCAAACAACATGGATAGAGCAGTTAAATTATACAAGAAGCTCAAAAGAGAAATAACATTCCATGGGGC
CAAGGAGGTGTCACTAAGCTATTCAACTGGCGCACTTGCCAGTTGCATGGGCCTCATATACAACAGGATGGG
AACAGTGACCACAGAAGCTGCTTTTGGCCTAGTGTGTGCCACTTGTGAACAGATTGCTGATTCACAGCATCG
GTCTCACAGACAGATGGCTACAACCACCAATCCACTAATCAGGCATGAGAACAGAATGGTGCTGGCTAGCAC
TACGGCAAAGGCTATGGAACAGATGGCTGGATCGAGTGAGCAGGCAGCAGAGGCCATGGAGGTTGCTAATCA
GACTAGGCAGATGGTACATGCAATGAGAACTATTGGGACTCATCCTAGTTCCAGTACTGGTCTGAAAGATGA
CCTTCTTGAAAATTTGCAGGCCTACCAGAAGCGAATGGGAGTGCAGATGCAGCGATTCAAGTGATCCTCTCG
CCACTGCAGCAAATATCATTGGGATCTTGCACCTGATATTGTGGATTGCTGATCGTCTTTTTTTCAAATGTA
TTTATCGTCGCTTTAAATACGGTTTGAAAAGAGGGCCTTCAACGGAAGGAGTGCCTGAGTCCATGAGGGAAG
AATACCAACAGGAACAGCAGAGTGCTGTGGATGTTGACGATGGTCATTTTGTCAACATAGAGCTAGAGTAA-
-------------------
>A/swine/Utah/A02142228/2018/1-982
-------------------------ATGAGTCTTCTGACCGAGGTCGAAACGTACGTTCTTTCTATCATCCC
GTCAGGCCCCCTCAAAGCCGAGATCGCGCAGAGACTGGAAAGTGTCTTTGCAGGAAAGAACACAGATCTTGA
GGCTCTCATGGAATGGCTAAAGACAAGACCAATCTTGTCACCTTTGACCAAGGGCATTTTGGGATTTGTGTT
CACGCTCACCGTGCCCAGTGAGCGAGGACTGCAGCGTAGACGCTTTGTCCAAAATGCCCTAAATGGGAATGG
GGACCCAAACAACATGGATAGAGCAGTTAAACTATACAAGAAGCTCAAAAGAGAAATAACGTTCCATGGGGC
CAAGGAGGTGTCACTAAGCTATTCAACTGGCGCACTTGCCAGTTGCATGGGCCTCATATACAACAGGATGGG
AACAGTAACCACAGAAGCTGCTTTTGGTTTAGTATGTGCCACTTGTGAACAGATAGCTGATTCACAGCATCG
GTCTCACAGACAAATGGCTACTACCACCAATCCACTAATCAGACATGAAAACAGAATGGTGCTGGCTAGCAC
TACGGCAAAGGCCATGGAACAGATGGCTGGATCGAGTGAACAGGCAGCAGAGGCCATGGAGGTTGCTAATCA
GACTAGGCAGATGGTACATGCAATGAGAACCATTGGGACTCATCCTAGCTCCAGTGCTGGTCTGAAAGATGA
CCTTCTTGAAAATTTGCAGGCCTACCAGAAACGAATGGGAGTGCAGATGCAGCGATTCAAGTGATCCTCTCG
TCATCGCAGCAAATATCATTGGGATCTTGCACCTGATATTGTGGATTACAGATCGTCTTTTTTTCAAATGCA
TTTATCGTCGCTTTAGATACGGGTTGAAAAGAGGGCCTTCTACGGAAGGAGTGCCTGAGTCCATGAGGGAAG
AATATCAACAGGAACAGCAGAGTGCGGTGGATGTTGACGATGGTCATTTTGTCAACATAGAGCTAGAGTAA-
-------------------
>A/swine/Nebraska/A01785413/2018/1-982
-------------------------ATGAGTCTTCTAACCGAGGTCGAAACGTACGTTCTTTCTATCATCCC
GTCAGGCCCCCTCAAAGCCGAGATCGCGCAGAGACTGGAAAGTGTCTTTGCAGGAAAGAACACAGATCTTGA
GGCTCTCATGGAATGGCTAAAGACAAGACCAATCTTGTCACCTTTGACTAAGGGAATTTTAGGATTTGTGTT
CACGCTCACCGTGCCCAGTGAGCGAGGACTGCAGCGTAGACGCTTTGTTCAAAATGCCCTAAATGGGAATGG
GGACCCAAACAACATGGATAGAGCAGTTAAACTATATAAGAAGCTCAAAAGAGAAATAACGTTCCATGGGGC
CAAGGAGGTGTCACTAAGCTATTCAACTGGTGCACTTGCCAGTTGCATGGGCCTCATATACAACAGAATGGG
AACAGTAACCACAGAAGCTGCTTTTGGTCTAGTATGTGCCACTTGTGAACAGATTGCTGATTCACAGCATCG
ATCTCACAGACAAATAGCTACTACCACCAATCCACTAATCAGGCATGAAAACAGAATGGTGCTGGCTAGCAT
TACGGCAAAGGCCATGGAACAAATGGCTGGATCGAGTGAACAAGCAGCAGAGGCCATGGAGGTTGCTAATCA
GACTAGGCAGATGGTACATGCAATGAGAACTATTGGGACTCATCCTAGCTCCAGTGCTGGTCTGAAAGATGA
CCTTCTTGAAAATTTGCAGGCCTACCAGAAACGAATGGGAGTGCAGATGCAGCGATTCAAATGATCCTCTCG
TCATTGCAGCAAATATCATTGGGATCTTGCACCTGATATTGTGGATTACAGATCGTCTTTTTTTCAAATGCA
TTTATCGTCGCTTTAAATACGGGCTGAAAAGAGGGCCTTCTACGGAAGGAGTGCCTGAGTCCATGAGGGAAG
AATATCAACAGGAACAGCAGAGTGCGGTGGATGTTGACGATGGTCATTTTGTCAACATAGAGCTAGAGTAA-
-------------------
>A/swine/Illinois/A01644323/2018/1-982
-------------------------ATGAGTCTTCTAACCGAGGTCGAAACGTACGTTCTTTCTATCATCCC
GTCAGGCCCCCTCAAAGCCGAGATCGCGCAGAGACTGGAAAGTGTATTTGCAGGAAAGAACACAGACCTTGA
GGCTCTCATGGAATGGTTAAAGACAAGACCAATCTTGTCACCTCTGACTAAGGGAATTTTAGGATTTGTGTT
CACGCTCACCGTGCCCAGTGAGCGAGGACTGCAGCGTAGACGCTTTGTCCAAAATGCCCTAAATGGGAATGG
GGACCCGAACAACATGGATAGAGCAGTTAAACTATACAAGAAGCTCAAAAGAGAAATAACGTTCCATGGGGC
TAAGGAGGTGTCACTGAGCTATTCAACTGGTGCACTTGCCAGTTGCATGGGCCTCATATACAACAGGATGGG
AACAGTGACCACAGAAGCTGCTTTTGGTCTAGTGTGTGCCACTTGTGAACAGATTGCTGATTCACAGCATCG
ATCTCACAGACAAATGGCTACTACCACCAATCCACTAATTAGGCATGAAAATAGAATGGTGCTGGCTAGCAC
TACTGCAAAGGCTATGGAACAGATGGCTGGATCGAGTGAACAGGCAGCAGAGGCCATGGAGGTTGCTAATCA
GACTAGGCAGATGGTACATGCAATGAGAACTATTGGGACTCATCCTAGCTCCAGTGCTGGTCTGAAGGATGA
CCTTCTTGAAAATTTACAGGCCTACCAGAAGCGAATGGGAGTGCAAATGCAGCGATTCAAGTGATCCTCTCG
TCATTGCAGCAAATATCATTGGGATCTTGCACCTGATATTGTGGATTATTGATCGTCTTTTTTTCAAATGTA
TTTATCGTCGCTTTAAATACGGTTTGAAAAGAGGGCCTTCTACAGAAGGAGTGCCTGAGTCCATGAGGGAAG
AATATCAACAGGAACAGCAGAGTGCTGTGGATGTTGACGATGGTCATTTTGTCAACATAGAGCTAGAGTAA-
-------------------
>A/swine/South_Dakota/A01785408/2018/1-982
-------------------------ATGAGTCTTCTGACCGAGGTCGAAACGTACGTTCTTTCTATCATCCC
GTCAGGCCCCCTCAAAGCCGAGATCGCACAGAGACTGGAAAGTGTCTTTGCAGGAAAGAACACAGATCTTGA
GGCCCTCATGGAATGGCTAAAGACAAGACCAATCTTGTCACCTCTGACTAAGGGGATTTTAGGATTTGTGTT
CACGCTCACCGTGCCCAGTGAGCGAGGACTGCAGCGTAGACGCTTTGTCCAAAATGCCCTAAATGGAAACGG
GGACCCGAACAACATGGATAGAGCAGTTAAGCTATACAAGAAGCTCAAAAGAGAAATAACATTCCATGGGGC
CAAGGAGGTGTCACTAAGCTATTCAACTGGTGCACTTGCCAGTTGCATGGGCCTCATATACAACAGGATGGG
AACAGTAACCACAGAAGCTGCTTTTGGTCTAGTGTGTGCCACTTGTGAGCAGATTGCTGATTCACAGCATCG
GTCTCACAGACAAATGGCTACTACCACCAATCCACTGATCAGGCATGAAAACAGGATGGTGCTGGCTAGCAC
TACGGCAAAGGCTATGGAACAGATGGCTGGATCGAGTGAGCAGGCAGCAGAGGCCATGGAGGTTGCTAATAA
CACTAGGCAGATGGTACATGCAATGAGAACTATTGGGACTCATCCTAGCTCCAGTGCTGGTCTGAAAGATGA
CCTTCTTGAAAATTTGCAGGCCTACCAGAAGCGAATGGGAGTGCAAATGCAGCGATTCAAATGATCCTCTCG
TCATTGCAGCAAATATCATTGGGATCTTGCACCTGATATTGTGGATTTCTGATCGTCTTTTTTTCAAATGTG
TTTATCGTCACTTTAAATACGGTTTGAAAAGAGGGCCTTCTACAGAAGGAGTGCCTGAGTCCATGAGGGAAG
AATATCAACAGGAGCAGCAGAGTGCTGTGGATGTTGACGATGGTCATTTTGTCAACATAGAGCTTGAGTAA-
-------------------
>A/swine/Ohio/A02139385/2018/1-982
-------------------------ATGAGTCTTCTAACCGAGGTCGAAACGTACGTTCTTTCTATCATCCC
GTCAGGCTCCCTCAAAGCCGAGATCGCGCAGAGACTGGAAAGTGTTTTTTCAGGAAAGAACACGGATCTTGA
GGCTCTCATGGAATGGCTAAAGACAAGACCAATCTTGTCACCTCTGACTAAGGGGATTTTAGGATTTGTGTT
CACGCTCACCGTGCCCAGTGAGCGAGGACTGCAGCGTAGACGCTTTGTCCAAAATGCCCTAAATGGGAATGG
GGACCCTAACAACATGGATAGAGCAGTTAAACTATACAAGAAGCTCAAAAGAGAAATAACGTTCCATGGGGC
CAAGGAGGTGTCACTAAGCTATTCAACTGGTGCACTTGCCAGTTGCATGGGCCTCATATACAACCGGATGGG
AACAGTGACCACAGAAGCTGCCTTTGGTCTGGTGTGTGCCACCTGTGAACAGATTGCTGATTCACAGCATCG
GTCTCACAGACAAATGGCTACTACCACCAATCCACTAATCAGACATGAAAACAGAATGGTGCTGGCTAGCAC
TACGGCAAAGGCTATGGAACAAATGGCTGGATCGAGTGAACAGGCAGCAGAGGCCATGGAGGTTGCTAATCA
AACTAGGCAGATGGTACATGCAATGAGAACTATTGGGACTCATCCTAGCTCCAGTGCTGGTCTGAAAGATGA
CCTTCTTGAAAATTTGCAGGCCTACCAGAAGCGAATGGGAGTGCAAATGCAGCGATTCAAGTGACCCTCTCG
TCATCGCAGCAAATATCATTGGGATCTTGCACCTGATATTGTGGATTACTGATCGTCTCTTTTTCAAATGTA
TTTATCGTCGCTTTAAATACGGTTTGAAAAGAGGGCCTTCTACGGAAGGAGTGCCTGAGTCCATGAGGGAAG
AATATCAACAGGAACAGCAGAGTGCTGTGGATGTTGACGATGGTCATTTTGTCAACATAGAGCTAGAGTAA-
-------------------
>A/swine/South_Dakota/A02142231/2018/1-982
-------------------------ATGAGTCTTCTAACCGAGGTCGAAACGTACGTTCTTTCTATCATCCC
GTCAGGCTCCCTCAAAGCCGAGATCGCGCAGAGACTGGAAAGTGTTTTTTCAGGGAAGAACACAGATCTTGA
GGCTCTCATGGAATGGCTAAAGACAAGACCAATCTTGTCACCTCTGACTAAGGGGATTTTAGGATTTGTGTT
CACGCTCACCGTGCCCAGTGAGCGAGGACTGCAGCGTAGACGCTTTGTTCAAAATGCCCTAAATGGGAATGG
GGACCCGAACAACATGGATAGAGCAGTTAAACTATACAAGAAGCTCAAAAGAGAAATAACGTTCCATGGGGC
CAAGGAGGTGTCACTAAGCTATTCAACTGGTGCACTTGCCAGTTGCATGGGCCTCATATACAACAGGATGGG
AACAGTGACCACAGAAGCTGCTCTTGGTCTAGTGTGTGCCACTTGTGAGCAGATTGCTGATTCACAGCATCG
GTCTCACAGACAAATGGCTACTACCACCAATCCACTAATCAGGCATGAAAACAGAATGGTGCTGGCTAGCAC
TACGGCAAAGGCTATGGAACAGATGGCTGGATCGAGTGAACAGGCAGCAGAGGCCATTGAGGTTGCTAATCA
AACTAGGCAGATGGTGCATGCAATGAGAACTATTGGGACTCATCCTAGCTCCAGCGCTGGTCTGAAAGATGA
CCTTCTTGAAAATTTGCAGGCCTACCAGAAGCGAATGGGAGTGCAGATGCAGCGATTCAAATGATCCTCTCG
CCATTGCAGCAAACATCATTGGGATCTTGCACCTGATATTGTGGATTACTGATCGTCTTTTTTTCAAATGTA
TTTATCGTCGCTTTAAATACGGTTTGAAAAGAGGGCCTTCTACGGAAGGAGTGCCTGAGTCCATGAGGGAAG
AATATCAACAAGAACAGCAGAGTGCTGTGGATGTTGACGATGGTCATTTTGTCAACATAGAGCTGGAGTAA-
-------------------
>A/swine/Oklahoma/A01785437/2018/1-982
-------------------------ATGAGTCTTCTAACCGAGGTCGAAACGTACGTTCTTTCTATCATCCC
GTCAGGCCCCCTCAAAGCCGAGATCGCGCAGAGACTGGAAAGTGTATTTGCAGGAAAGAACACAGATCTTGA
GGCTCTCATGGAATGGCTAAAGACAAGACCAATCTTGTCACCTCTGACTAAGGGAATTTTAGGATTTGTGTT
CACGCTCACCGTGCCCAGTGAGCGAGGACTGCAGCGTAGACGCTTTGTCCAAAATGCCCTAAATGGGAATGG
GGACCCGAACAATATGGATAGAGCAGTTAAACTATACAAGAAGCTCAAGAGAGAAATAACGTTCCATGGGGC
TAAAGAGGTGTCACTAAGCTATTCAACTGGTGCACTTGCCAGTTGCCTGGGCCTCATATACAACAGGATGGG
AACAGTGACCACAGAAGCTGCTTTTGGTCTAGTGTGTGCCACTTGTGAACAGATTGCTGATTCACAGCATCG
ATCTCACAGACAAATGGTTGCTACCACCAATCCACTAATCAGGCATGAAAACAGAATGGTGCTGGCTAGCAC
TACTGCAAAGGCTATGGAACAGATGGCTGGATCGAGTGAACAGGCAGCAGAGGCCATGGAGGTTGCTAATCA
GACTAGGCAGATGGTACATGCAATGAGGACTATTGGGACTCATCCTAGCTCCAGTGCTGGTCTGAAGGATGA
CCTTCTTGAAAATTTACAGGCCTACCAGAAGCGAATGGGAGTGCAAATGCAGCGATTCAAGTGATCCTCTCG
TCATTGCAGCAAATATCATTGGGATCTTGCACCTGATATTGTGGATTATTGATCGTCTTTTCTTCAAATGTA
TTTATCGTCGCTTTAAATACGGTTTGAAAAGAGGGCCTCCTACAGAGGGAGTGCCTGAGTCCATGAGGGAAG
AATATCAACAGGAACAGCAGAGTGCTGTAGATGTTGACGATGGTCATTTTGTCAACATAGAGCTAGAGTAA-
-------------------
>A/swine/Iowa/A02139353/2018/1-982
-------------------------ATGAGTCTTCTAACCGAGGTCGAAACGTACGTTCTTTCTATCATACC
GTCAGGCCCCCTCAAAGCCGAGATCGCGCAGAGACTGGAAAGTGTCTTTGCAGGGAAAAACACAGATCTTGA
AGCTCTCATGGAATGGCTAAAGACAAGACCAATCTTGTCACCTCTGACTAAGGGAATTTTGGGATTTGTGTT
CACGCTCACCGTGCCCAGTGAGCGAGGACTGCAGCGTAGACGCTTTGTCCAAAATGCCCTAAATGGAAATGG
GGACCCAAACAACATGGATAGAGCAGTTAAACTATACAAGAAGCTCAAAAGAGAAATAACATTCCATGGGGC
CAAGGAGGTGTCACTAAGCTATTCAACTGGTGCACTTGCCAGTTGCATGGGCCTCATATATAACAGGATGGG
AACAGTGACCACAGAAGCCGCTTTTGGTCTAGTGTGTGCCACTTGTGAACAGATTGCTGATTCACAGCATCG
GTCTCACAGACAGATGGCCACAACCACCAATCCACTAATCAGGCATGAGAACAGAATGGTGCTGGCTAGCAC
TACGGCAAAGGCTATGGAACAGATGGCTGGATCGAGTGAACAGGCAGCGGAGGCCATGGAGGTTGCTAATCA
GACTAGGCAGATGGTACATGCAATGAGAACTATTGGGACTCATCCTAGCTCCAGTACTGGTCTGAAAGATGA
CCTTCTTGAAAATTTGCAGGCCTACCAGAAGCGAATGGGAGTGCAGATGCAGCGATTCAAGTGATCCTCTCG
CCATTGCAGCAAATATCATTGGGATCTTGCACCTGATATTGTGGATTGCTGATCGTCTTTTTTTCAAATGTA
TTTATCGTCGCTTTAAATACGGTTTGAAAAGAGGGCCTTCAACGGAAGGAGTGCCTGAGTCCATGAGGGAAG
AATACCAACAGGAACAGCAGAGTGCTGTGGATGTTGACGATGGTCATTTTGTCAACATAGAGCTAGAGTAA-
-------------------
>A/swine/Texas/A01785420/2018/1-982
-------------------------ATGAGTCTTCTAACCGAGGTCGAAACGTACGTTCTTTCTATCATACC
GTCAGGCCCCCTCAAAGCCGAGATTGCGCAGAGACTGGAAAGTGTCTTTGCAGGAAAGAATACAGACCTTGA
GGCTCTCATGGAATGGCTAAAGACAAGACCAATCTTGTCACCTTTGACTAAGGGAATTTTAGGATTTGTGTT
CACGCTCACCGTGCCCAGTGAGCGAGGACTGCAGCGTAGACGCTTTGTCCAAAATGCCCTGAATGGGAATGG
GGACCCAAACAACATGGATAGAGCAGTTAAACTATACAAGAAGCTCAAAAGGGAGATAACGTTCCATGGGGC
TAAGGAGGTGTCACTAAGCTATTCAACTGGTGCACTCGCCAGTTGCATGGGCCTCATATACAACAGGATGGG
AACAGTGACCACAGAAGCTGCTTTTGGTCTAGTGTGTGCCACTTGTGAACAGATTGCTGATTCACAGCATCG
GTCTCACAGACAGATGGCTACAACCACCAACCCACTAATCAGACATGAAAACAGAATGGTGCTGGCTAGCAC
TACGGCAAAGGCTATGGAACAGATGGCTGGATCGAGTGAACAGGCAGCGGAGGCCATGGAGGTTGCTAATCA
GACTAGGCAAATGGTACATGCAATGAGAACTATTGGGACTCATCCTAGTTCCAGTACTGGTCTGAAAGATGA
CCTTCTTGAAAATTTGCAGGCCTACCAGAAGCGAATGGGAGTGCAGATGCAGCGATTTAAGTGATCCTCTCG
CCATTGCAGCAAATATCATTGGGATCTTGCACCTGATATTGTGGATTACTGATCGTCTTTTTTTCAAATGTA
TTTATCGTCGCTTTAAATACGGTTTGAAAAGAGGGCCTTCTACGGAAGGAGTGCCTGAGTCCATGAGGGAAG
AATATCAACAGGAACAGCAGAGTGCTGTGGATGTTGACGATGGTCATTTTGTCAACATAGAGCTAGAGTAA-
-------------------
>A/swine/Texas/A01785406/2018/1-982
-------------------------ATGAGTCTTCTAACCGAGGTCGAAACGTACGTTCTTTCTATCATACC
GTCAGGCCCCCTCAAAGCCGAGATTGCGCAGAGACTGGAAAGTGTCTTTGCAGGAAAAAATACAGACCTTGA
GGCTCTCATGGAATGGCTAAAGACAAGACCAATCTTGTCACCTTTGACTAAGGGGATTTTAGGATTTGTGTT
CACGCTCACCGTGCCCAGTGAGCGAGGACTGCAGCGTAGACGCTTTGTCCAAAATGCCCTGAATGGGAATGG
GGACCCAAACAACATGGATAGAGCAGTTAAACTATACAAGAAGCTCAAAAGAGAGATAACGTTCCATGGGGC
TAAGGAGGTGTCACTAAGCTATTCAACTGGTGCACTTGCCAGTTGCATGGGCCTCATATACAACAGGATGGG
AACAGTGACAACAGAAGCTGCTTTTGGTCTAGTGTGTGCCACTTGTGAACAGATTGCTGATTCACAGCATCG
GTCTCACAGACAGATGGCTACAACCACAAATCCACTAATCAGGCATGAAAACAGAATGGTGCTGGCTAGCAC
TACGGCAAAGGCTATGGAACAAATGGCTGGATCGAGTGAACAGGCAGCGGAGGCCATGGAGGTTGCTAATCA
GACTAGGCAGATGGTACATGCAATGAGAACTATTGGGACTCATCCTAGTTCCAGTACTGGTCTGAAAGATGA
CCTTCTTGAAAATTTGCAGGCCTACCAGAAGCGAATGGGAGTGCAGATGCAGCGATTTAAGTGATCCTCTCG
CTATTGCAGCAAATATCATTGGGATCTTGCACCTGATATTGTGGATTACTGATCGTCTTTTTTTCAAATGTA
TTTATCGTCGCTTTAAATACGGTTTGAAAAGAGGGCCTTCTACGGAAGGAGTGCCTGAGTCCATGAGGGAAG
AATATCAACAGGAACAGCAGAGTGCTGTGGATGTTGACGATGGTCATTTTGTCAACATAGAGCTAGAGTAA-
-------------------
>A/swine/Iowa/A02140876/2018/1-982
-------------------------ATGAGTCTTCTAACCGAGGTCGAAACGTACGTTCTTTCTATCATCCC
ATCAGGCTCCCTCAAAGCCGAGATCGCGCAGAGACTGGAAAGTGTTTTTTCAGGAAAGAACACAGATCTTGA
GGCTCTCATGGAATGGCTAAAGACAAGACCAATCTTGTCACCTCTGACCAAGGGGATTTTAGGATTTGTGTT
CACGCTCACCGTGCCCAGTGAGCGAGGACTGCAGCGTAGACGCTTTGTCCAAAATGCCCTAAATGGGAATGG
GGACCCGAACAACATGGATAGAGCAGTTAAACTATACAAGAAGCTCAAAAGAGAAATAACGTTCCATGGGGC
CAAGGAGGTGTCACTAAGCTATTCAACTGGTGCACTTGCCAGTTGCATGGGCCTCATATACAACAGGATGGG
AACAGTGACCACAGAAGCTGCTTTTGGTCTAGTGTGTGCCACTTGTGAACAGATTGCTGATTCACAACATCG
GTCTCACAGACAAATGGCTACTACCACCAATCCACTAATCAGACATGAAAACAGAATGGTGCTAGCTAGCAC
TACGGCAAAGGCTATGGAACAGATGGCTGGATCGAGTGAACAGGCAGCAGAGGCCATGGAGGTTGCTAATCA
AACTAGGCAGATGGTACATGCAATGAGAACTATTGGGACTCATCCTAGCTCCAGTGCTGGTCTGAAAGATGA
CCTTCTTGAAAATTTGCAGGCCTACCAGAAGCGAATGGGAGTGCAGATGCAGCGATTCAAATGACCCTCTCG
TCATTGCAGCGAATATCATTGGAATCTTGCACCTGATATTGTGGATTACTGATCGTCTTTTTTTCAAATGTA
TTTATCGTCGCTTTAAATACGGTTTGAAAAGAGGGCCTTCTACGGAAGGAGTGCCTGAGTCCATGAGGGAAG
AATATCAACAGGAACAGCAGAATGCTGTGGATGTTGACGATGGTCATTTTGTCAACATAGAGCTAGAGTAA-
-------------------
>A/swine/Wisconsin/A02140875/2018/1-982
-------------------------ATGAGTCTTCTAACCGAGGTCGAAACGTACGTTCTTTCTATCATACC
GTCAGGCCCCCTCAAAGCCGAGATTGCGCAGAGACTGGAAAGTGTCTTTGCAGGAAAGAATACAGACCTTGA
GGCTCTCATGGAATGGCTAAAGACAAGACCAATCTTGTCACCTTTGACTAAGGGAATTTTAGGATTTGTGTT
CACGCTCACCGTGCCCAGTGAGCGAGGACTGCAGCGTAGACGCTTTGTCCAAAATGCCCTGAATGGGAATGG
GGACCCAAACAACATGGATAGAGCAGTTAAACTATACAAGAAGCTCAAAAGAGAAATAACGTTCCATGGGGC
CAAGGAGGTGTCACTAAGCTATTCAACTGGTGCACTTGCCAGTTGCATGGGCCTCATATACAACAGGATGGG
AACAGTGACCACAGAAGCTGCTTTTGGCCTAGTGTGTGCCACTTGTGAACAGATTGCTGATTCACAGCATCG
GTCTCACAGACAGATGGCTACAACCACCAATCCACTAATCAGGCATGAGAACAGAATGGTGCTGGCTAGCAC
TACGGCAAAGGCTATGGAACAGATGGCTGGATCAAGTGAACAGGCAGCGGAGGCCATGGAGGTTGCTAATCA
GACTAGGCAGATGGTACATGCAATGAGAACTATTGGGACTCATCCTAGTTCCAGTACTGGTCTGAAAGATGA
CCTTCTTGAAAATTTGCAGGCCTATCAGAAACGAATGGGAGTGCAGATGCAGCGGTTTAAGTGATCCACTCG
CCATTGCAGCAAATATCATTGGGATCTTGCACCTGATATTGTGGATTACTGATCGTCTTTTTTTCAAATGTA
TTTATCGTCGCTTTAAATACGGTTTGAAAAGAGGGCCTTCTACGGAAGGAGTGCCTGAGTCCATGAGGGAAG
AATATCAACAGGAACAGCAGAGTGCTGTGGATGTTGACGATGGTCATTTTGTCAACATAGAGCTGGAGTAA-
-------------------
>A/swine/Texas/A01785448/2018/1-982
-------------------------ATGAGTCTTCTAACCGAGGTCGAAACGTACGTTCTTTCTATCATCCC
ATCAGGCCCCCTCAAAGCCGAGATCGCGCAGAGACTGGAGAGTGTCTTTGCAGGAAAGAACACAGATCTTGA
GGCTCTCATGGAATGGCTAAAGACAAGACCAATCTTGTCACCTTTGACTAAGGGAATTTTAGGATTTGTGTT
CACGCTCACCGTGCCCAGTGAGCGAGGACTGCAGCGTAGACGCTTTGTCCAAAATGCCCTAAATGGGAATGG
GGACCCGAACAACATGGATAGAGCAGTCAAACTATACAAGAAGCTCAAAAGAGAAATAACGTTCCATGGGGC
CAAGGAGGTGTCACTAAGCTATTCAACTGGTGCACTTGCCAGTTGCATGGGTCTCATATATAACAGAATGGG
GACAGTGACCACAGAAGCCGCTTTTGGTCTAGTATGTGCCACTTGTGAACAGATTGCTGATTCACAGCATCG
GTCTCACAGACAAATGGCCACCACCACCAATCCACTAATCAGGCATGAAAACAGAATGGTGCTGGCTAGCAC
TACGGCAAAGGCTATGGAACAGATGGCTGGATCGAGTGAACAGGCAGCAGAGGCCATGGAGGTTGCTAATCA
GACTAGGCAGATGGTACATGCAATGAGGACTATCGGGACTCATCCTAGCTCCAGTGCTGGTCTGAAAGATGA
CCTTCTTGAAAATTTGCAGGCCTACCAGAAACGAATGGGAGTGCAGATGCAGCGATTCAAGTGATCCTCTCG
CCATTGCAGCAAATATCATTGGAATATTGCACCTGATATTGTGGATTACAGATCGTCTTTTTTTCAAATGCA
TTTATCGTCGCTTTAAATACGGGTTGAAAAGAGGGCCTTCTACGGAAGGAGTGCCTGAGTCCATGAGGGAAG
AATATCAACAGGAACAGCAGAGTGCGGTGGATGTTGACGATGGTCATTTTGTCAACATAGAGCTAGAGTAA-
-------------------
>A/swine/Iowa/A02142529/2018/1-982
-------------------------ATGAGTCTTCTAACCGAGGTTGAAACGTACGTTCTTTCTATCATCCC
GTCAGGCCCCCTCAAAGCCGAGATCGCGCAGAGACTGGAAAGTGTCTTTGCAGGAAAGAACACAGATCTTGA
GGCTCTCATGGAATGGCTAAAGACAAGACCAATCTTGTCACCTCTGACTAAGGGAATTTTAGGATTTGTGTT
CACGCTCACCGTGCCCAGTGAGCGAGGACTGCAGCGTAGACGCTTTGTCCAAAATGCCCTAAATGGAAATGG
GGACCCCAACAACATGGATAGAGCAGTTAAACTATACAAGAAGCTCAAAAGAGAAATAACGTTCCATGGGGC
TAAGGAGGTGTCACTAAGCTATTCAACTGGTGCACTTGCCAGTTGCATGGGCCTCATATACAACAGGATGGG
AACAGTGACCACAGAAGCTGCTTTTGGTCTAGTGTGTGCCACCTGTGAACAGATTGCTGATTCACAGCATCG
GTCTCACAGACAAATGGCTACAACCACCAATCCACTAATCAGGCATGAAAATAGAATGGTGCTGGCTAGCAC
TACTGCAAAGGCTATGGAACAGATGGCTGGATCGAGTGAACAGGCAGCAGAGGCCATGGAGGTTGCTAATCA
GACTAGGCAGATGGTACATGCAATGAGAACTATTGGGACTCATCCTAACTCCAGTGCTGGTCTGAAAGATGA
CCTTCTTGAAAATTTACAGGCCTATCAGAAGCGAATGGGAGTGCAAATGCAGCGATTCAAGTGATCCTCTCG
TCATTGCAGCAAATATCATTGGGATCTTGCACTTGATATTGTGGATTACTGATCGTCTTTTTTTCAAATATA
TTTACCGTCGCTTTAAATACGGTTTGAAAAGAGGGCCTTCTACAGAAGGAGTGCCTGAGTCCATGAGGGAAG
AATATCAACAGGAACAGCAGAGTGCTGTGGATGTTGACGATGGTCATTTTGTCAACATAGAGCTAGAGTAA-
-------------------
>A/swine/Iowa/A02142599/2018/1-982
-------------------------ATGAGTCTTCTAACCGAGGTCGAAACGTACGTTCTTTCTATCATCCC
GTCAGGCTCCCTCAAAGCCGAGATCGCGCAGAGACTGGAAAGTGTTTTCTCAGGAAAGAGCGCAGATCTTGA
GGCTCTCATGGAATGGCTAAAGACAAGACCAATCTTGTCACCTCTGACTAAGGGGATTTTAGGATTTGTGTT
CACGCTCACCGTGCCCAGTGAGCGAGGACTGCAGCGTAGACGCTTTGTCCAAAATGCCCTAAATGGGAATGG
GGACCCGAACAACATGGATAGAGCAGTTAAACTATACAAGAAGCTCAAAAGAGAAATAACGTTCCATGGGGC
CAAGGAGGTGTCACTAAGCTATTCAACTGGTGCACTTGCCAGTTGCATGGGCCTCATATACAACAGAATGGG
AACAGTGACCACAGAAGCTGCTTTTGGTCTAGTGTGTGCCACTTGTGAACAGATTGCTGATTCACAGCATCG
GTCTCACAGACAAATGGCTACTACCACCAATCCACTAATCAGGCATGAAAACAGAATGGTGCTGGCTAGCAC
TACGGCAAAGGCTATGGAACAGATGGCTGGATCGAGTGAACAGGCAGCAGAGGCCATGGAGGTTGCTAATCA
AACTAGGCAGATGGTACATGCAATGAGAACCATTGGGACTCATCCTAGCTCCAGTGCTGGTCTGAAAGATGA
CCTTCTTGAAAATTTGCAGGCCTACCAGAAGCGAATGGGAGTGCAGATGCAGCGATTCAAATGATCCTCTCG
TCATTGCAGCAAATATCATTGGGATCTTGCACCTGATATTGTGGATTACTGATCGTCTTCTCTTCAAATGTA
TTTATCGTCGCTTTAAATACGGTTTGAAAAGAGGGCCTTCTACGGAAGGAGTGCCTGAGTCCATGAGGGAAG
AATATCAACAGGAACAGCAGAGTGCTGTGGATGTTGACGATGGTCATTTTGTCAACATAGAGCTAGAGTAA-
-------------------
>A/swine/Indiana/A02142417/2018/1-982
-------------------------ATGAGTCTTCTAACCGAGGTCGAAACGTACGTTCTTTCTATCATCCC
GTCAGGCCCCCTCAAAGCCGAGATCGCGCAGAGACTGGAAAGTGTATTTGCAGGAAAGAACACAGACCTTGA
GGCTCTCATGGAATGGTTAAAGACAAGACCAATCTTGTCACCTCTGACTAAGGGAATTTTAGGATTTGTGTT
CACGCTCACCGTGCCCAGTGAGCGAGGACTGCAGCGTAGACGCTTTGTCCAAAATGCCCTAAATGGGAATGG
GGACCCGAACAACATGGATAGAGCAGTTAAACTATACAAGAAGCTCAAAAGAGAAATAACGTTCCATGGGGC
TAAGGAGGTGTCACTGAGCTATTCAACTGGTGCACTTGCCAGTTGCATGGGCCTCATATACAACAGGATGGG
AACAGTGACCACAGAAGCTGCTTTTGGTCTAGTGTGTGCCACTTGTGAACAGATTGCTGATTCACAGCATCG
ATCTCACAGACAAATGGCTACTACCACCAATCCACTAATCAGGCATGAAAATAGAATGGTGCTGGCTAGCAC
TACTGCAAAGGCTATGGAACAGATGGCTGGATCGAGTGAACAGGCAGCAGAGGCCATGGAGGTTGCTAATCA
GACTAGGCAGATGGTACATGCAATGAGAACTATTGGGACACATCCTAGCTCCAGTGCTGGTCTGAAAGATGA
CCTTCTTGAAAATTTACAGGCCTACCAGAAGCGAATGGGAGTGCAAATGCAGCGATTCAAGTGATCCTCTCG
TCATTGCAGCAAATATCATTGGGATCTTGCACCTGATATTGTGGATTATTGATCGTCTTTTTTTCAAATGTA
TTTATCGTCGCTTTAAATACGGTTTGAAAAGAGGGCCTTCTACAGAAGGAGTGCCTGAGTCCATGAGGGAAG
AATATCAACAGGAACAGCAGAGTGCTGTGGATGTTGACGATGGTCATTTTGTCAACATAGAGCTAGAGTAA-
-------------------
>A/swine/Missouri/A02142811/2018/1-982
-------------------------ATGAGTCTTCTAACCGAGGTCGAAACGTACGTTCTTTCTATCATACC
GTCAGGCCCCCTCAAAGCCGAGATTGCGCAGAGACTGGAAAGTGTCTTTGCAGGAAAGAATACAGACCTTGA
GGCTCTCATGGAATGGCTAAAGACAAGACCAATCTTGTCACCTTTGACTAAGGGAATTTTAGGATTTGTGTT
CACGCTCACCGTGCCCAGTGAGCGAGGACTGCAGCGTAGACGCTTTGTCCAAAATGCCCTGAATGGGAATGG
GGACCCAAACAACATGGATAGAGCAGTTAAACTATACAAGAAGCTCAAAAGAGAAATAACGTTTCATGGGGC
CAAGGAGGTGTCACTAAGCTATTCAACTGGTGCACTTGCCAGTTGCATGGGCCTCATATACAACAGGATGGG
AACAGTGACCACAGAAGCTGCTTTTGGTCTAGTGTGTGCCACTTGTGAACAAATTGCTGATTCACAGCATCG
GTCTCACAGACAGATGGCCACAACCACCAATCCACTAATCAGGCATGAGAACAGAATGGTGCTGGCTAGCAC
TACGGCAAAGGCTATGGAACAGATGGCTGGATCGAGTGAACAGGCAGCGGAGGCCATGGAGGTTGCTAATCA
GACTAGACAGATGGTACATGCAATGAGAACTATCGGGACTCATCCTAGTTCCAGTACTGGTCTGAAAGATGA
CCTTCTTGAAAATTTGCAGGCCTATCAGAAGCGAATGGGAGTGCAGATGCAGCGGTTTAAGTGATCCTCTCG
CCATTGCAGCTAATATCATTGGGATCTTGCACCTGATATTGTGGATTACTGATCGTCTTTTTTTCAAATGTA
TTTATCGTCGCTTTAAATACGGTTTGAAAAGAGGGCCTTCTACGGAAGGAGTGCCTGAGTCCATGAGGGAAG
AATATCAACAGGAACAGCAGAGTGCTGTGGATGTTGACGATGGTCATTTTGTCAACATAGAGCTGGAGTAA-
-------------------
>A/swine/Illinois/A02142422/2018/1-982
-------------------------ATGAGTCTTCTAACCGAGGTCGAAACGTACGTTCTTTCTATCATCCC
GTCAGGCTCCCTCAAAGCCGAGATCGCGCAGAGACTGGAAAGTGTTTTTTCAGGAAAGAACACGGATCTTGA
GGCTCTCATGGAATGGCTAAAGACAAGACCAATCTTGTCACCTCTGACTAAGGGGATTTTAGGATTTGTGTT
CACGCTCACCGTGCCCAGTGAGCGAGGACTGCAGCGTAGACGCTTTGTCCAAAATGCCCTAAATGGGAATGG
GGACCCGAACAACATGGATAGAGCAGTTAAACTATACAAGAAGCTCAAAAGAGAAATAACGTTCCATGGGGC
CAAGGAGGTGTCACTAAGCTATTCAACTGGTGCACTTGCCAGTTGCATGGGCCTCATATACAACCGGATGGG
AACAGTGACCACAGAAGCTGCCTTTGGTCTGGTGTGTGCCACCTGTGAACAGATTGCTGATTCACAGCATCG
GTCTCACAGACAAATGGCTACTACCACCAATCCACTAATCAGACATGAAAACAGAATGGTGCTGGCTAGCAC
TACGGCAAAGGCTATGGAACAAATGGCTGGATCGAGTGAACAGGCAGCAGAGGCCATGGAGGTTGCTAATCA
AACTAGGCAGATGGTACATGCAATGAGAACTATTGGGACTCATCCTAGCTCCAGTGCTGGTCTGAAAGATGA
CCTTCTTGAAAATTTGCAGGCCTACCAGAAGCGAATGGGAGTGCAAATGCAGCGATTCAAGTGACCCTCTCG
TCATCGCAGCAAATATCATTGGGATCTTGCACCTGATATTGTGGATTACTGATCGTCTTTTTTTCAAATGTA
TTTATCGTCGCTTTAAATACGGTTTGAAAAGAGGGCCTTCTACGGAAGGAGTGCCTGAGTCCATGAGGGAAG
AATATCAACAGGAACAGCAGAGTGCTGTGGATGTTGACGATGGTCATTTTGTCAACATAGAGCTAGAGTAA-
-------------------
>A/swine/South_Dakota/A01678540/2018/1-982
-------------------------ATGAGTCTTCTAACCGAGGTCGAAACGTACGTTCTTTCTATCATCCC
GTCAGGCTCCCTCAAAGCCGAGATCGCGCAGAGACTGGAAAGTGTTTTTTCAGGAAAGAACACAGATCTTGA
GGCTCTCATGGAATGGCTAAAGACAAGACCAATCTTGTCACCTCTGACTAAGGGGATTTTAGGGTTTGTGTT
CACGCTCACCGTGCCCAGTGAGCGAGGACTGCAGCGTAGACGCTTTGTTCAAAATGCCCTAAATGGGAATGG
GGACCCGAACAACATGGATAGAGCAGTTAAACTATACAAGAAGCTCAAAAGAGAAATAACGTTCCATGGGGC
CAAGGAGGTGTCACTAAGCTATTCAACTGGTGCACTTGCCAGTTGCATGGGCCTCATATACAACAGGATGGG
AACAGTGACCACAGAAGCTGCTTTTGGTCTAGTGTGTGCCACTTGTGAACAGATTGCTGATTCACAGCATCG
GTCTCACAGACAAATGGCCACTACCACCAATCCACTAATCAGGCATGAAAACAGAATGGTGCTGGCTAGCAC
TACGGCAAAGGCTATGGAACAGATGGCTGGATCGAGTGAACAGGCAGCAGAGGCCATTGAGGTTGCTAATCA
AACTAGGCAGATGGTGCATGCAATGAGAACTATTGGGACTCATCCTAGCTCCAGCGCTGGTCTGAAAGATGA
CCTTCTTGAAAATTTGCAGGCCTACCAGAAGCGAATGGGAGTGCAGATGCAGCGATTCAAATGATCCTCTCG
TCATTGCAGCAAATATCATTGGGATCTTGCACCTGATATTGTGGATTACTGATCGTCTTTTTTTCAAATGTA
TTTACCGTCGCTTTAAATACGGTTTGAAAAGAGGGCCTTCTACGGAAGGAGTGCCTGAGTCCATGAGGGAAG
AATATCAACAAGAACAGCAGAATGCTGTGGATGTTGACGATGGTCATTTTGTCAACATAGAGCTAGAGTAA-
-------------------
>A/swine/Texas/A01785447/2018/1-982
-------------------------ATGAGTCTTCTAACCGAGGTCGAAACGTACGTTCTTTCTATCATACC
GTCAGGCCCCCTCAAAGCCGAGATCGCGCAGAGACTGGAAAGTGTCTTTGCAGGAAAGAATACAGACCTTGA
GGCTCTCATGGAATGGCTAAAGACAAGACCAATCTTGTCACCTTTGACTAAGGGGATTTTAGGATTTGTGTT
CACGCTCACCGTGCCCAGTGAGCGAGGACTGCAGCGTAGACGCTTTGTCCAAAATGCCCTGAATGGGAATGG
GGACCCAAACAACATGGATAGAGCAGTTAAACTATACAAGAAGCTCAAAAGAGAGATAACGTTCCATGGGGC
TAAGGAGGTGTCACTAAGCTATTCAACTGGTGCACTTGCCAGTTGCATGGGCCTCATATACAACAGGATGGG
AACAGTGACAACAGAAGCTGCTTTTGGTCTAGTGTGTGCCACTTGTGAACAGATTGCTGATTCACAGCATCG
GTCTCACAGACAGATGGCCACAACCACCAATCCACTAATCAGGCATGAAAACAGAATGGTGCTGGCTAGCAC
TACGGCAAAGGCTATGGAACAGATGGCTGGATCGAGTGAACAGGCAGCGGAGGCCATGGAGGTTGCTAATCA
GACTAGGCAGATGGTACATGCAATGAGAACTATTGGGACTCATCCTAGTTCCAGTACTGGTCTGAAAGATGA
CCTTCTTGAAAATTTGCAGGCCTACCAGAAGCGAATGGGAGTGCAGATGCAGCGATTTAAGTGATCCTCTCG
CTATTGCAGCAAATATCATTGGGATCTTGCACCTGATATTGTGGATTACTGATCGTCTTTTTTTCAAATGTA
TTTATCGTCGCTTTAAATACGGTTTGAAAAGAGGGCCTTCTACGGAAGGAGTGCCTGAGTCCATGAGGGAAG
AATATCAACAGGAACAGCAGAGTGCTGTGGATGTTGACGATGGTCATTTTGTCAACATAGAGCTAGAGTAA-
-------------------
>A/swine/Iowa/A02142400/2018/1-982
-------------------------ATGAGTCTTCTAACCGAGGTTGAAACGTACGTTCTTTCTATCATCCC
GTCAGGCCCCCTCAAAGCCGAGATCGCGCAGAGACTGGAAAGTGTCTTTGCAGGAAAGAACACAGATCTTGA
GGCTCTCATGGAATGGCTAAAGACAAGACCAATCTTGTCACCTCTGACTAAGGGAATTTTAGGATTTGTGTT
CACGCTCACCGTGCCCAGTGAGCGAGGACTGCAGCGTAGACGCTTTGTCCAAAATGCCCTAAATGGAAATGG
GGACCCCAACAACATGGATAGAGCAGTTAAACTATACAAGAAGCTCAAAAGAGAAATAACGTTCCATGGGGC
TAAGGAGGTGTCACTAAGCTATTCAACTGGTGCACTTGCCAGTTGCATGGGCCTCATATACAACAGGATGGG
AACAGTGACCACAGAAGCTGCTTTTGGTCTAGTGTGTGCCACCTGTGAACAGATTGCTGATTCACAGCATCG
GTCTCACAGACAAATGGCTACAACCACCAATCCACTAATCAGGCATGAAAATAGAATGGTGCTGGCTAGCAC
TACTGCAAAGGCTATGGAACAGATGGCTGGATCGAGTGAACAGGCAGCAGAGGCCATGGAGGTTGCTAATCA
GACTAGGCAGATGGTACATGCAATGAGAACTATTGGGACTCATCCTAGCTCCAGTGCTGGTCTGAAAGATGA
CCTTCTTGAAAATTTACAGGCCTATCAGAAGCGAATGGGAGTGCAAATGCAGCGATTCAAGTGATCCTCTCG
TCATTGCAGCAAATATCATTGGGATCTTGCACTTGATATTGTGGATTACTGATCGTCTTTTTTTCAAATATA
TTTACCGTCGCTTTAAATACGGTTTGAAAAGAGGGCCTTCTACAGAAGGAGTACCTGAGTCCATGAGGGAAG
AATATCAACAGGAACAGCAGAGTGCTGTGGATGTTGACGATGGTCATTTTGTCAACATAGAGCTAGAGTAA-
-------------------
>A/swine/Minnesota/A01785446/2018/1-982
-------------------------ATGAGTCTTCTAACCGAGGTCGAAACGTACGTTCTTTCTATCATCCC
GTCAGGCCCCCTCAAAGCCGAGATCGCGCAGAGACTGGAAAGTGTATTTGCAGGAAAGAACACAGATCTTGA
GGCTCTCATGGAATGGCTAAAGACAAGACCAATCTTGTCACCTCTGACTAAGGGAATTTTAGGATTTGTGTT
CACGCTCACCGTGCCCAGTGAGCGAGGACTGCAGCGTAGACGCTTTGTCCAAAATGCCCTAAATGGGAATGG
GGACCCGAACAACATGGATAGAGCAGTTAAACTATACAAGAAGCTCAAAAGAGAAATAACGTTCCATGGGGC
TAAGGAGGTGTCACTAAGCTATTCAACTGGTGCACTTGCCAGTTGCATGGGCCTCATATACAACAGGATGGG
AACAGTGACCACAGAAGCTGCTTTTGGTCTAGTGTGTGCCACCTGTGAACAGATTGCTGATTCACAGCATCG
ATCTCACAGACAAATGGTTACTACCACCAATCCACTAATCAGGCATGAAAACAGAATGGTGCTGGCTAGCAC
TACTGCAAAGGCTATGGAACAGATGGCTGGATCGAGTGAACAGGCAGCAGAGGCCATGGAGGTTGCTAATCA
GACTAGGCAGATGGTACATGCAATGAGAACTATTGGGACTCATCCTAGCTCCAGTGCTGGTCTGAAGGATGA
CCTTCTTGAAAATTTACAGGCCTACCAGAAGCGAATGGGAGTGCAAATGCAGCGATTCAAGTGATCCTCTCG
TCATTGCAGCAAATATCATTGGGATCTTGCACCTGATATTGTGGATTACTGATCGTCTTTTTTTCAAATGTA
TTTATCGTCGCTTTAAATACGGTTTGAAAAGAGGGCCTCCTACTGAAGGAGTGCCTGAGTCCATGAGGGAAG
AATATCAACAGGAACAGCAGAGTGCTGTGGATGTTGACGATGGTCATTTTGTCAACATAGAGCTAGAGTAA-
-------------------
>A/swine/Missouri/A02142600/2018/1-982
-------------------------ATGAGTCTTCTAACCGAGGTCGAAACGTACGTTCTTTCTATCATCCC
GTCAGGCTCCCTCAAAGCCGAGATCGCGCAGAGACTGGAAAGTGTTTTCTCAGGAAAGAGCGCAGATCTTGA
GGCTCTCATGGAATGGCTAAAGACAAGACCAATCTTGTCACCTCTGACTAAGGGGATTTTAGGATTTGTGTT
CACGCTCACCGTGCCCAGTGAGCGAGGACTGCAGCGTAGACGCTTTGTCCAAAATGCCCTAAATGGGAATGG
GGACCCGAACAACATGGATAGAGCAGTTAAACTATACAAGAAGCTCAAAAGAGAAATAACGTTCCATGGGGC
CAAGGAGGTGTCACTAAGCTATTCAACTGGTGCACTTGCCAGTTGCATGGGCCTCATATACAACAGAATGGG
GACAGTGACCACAGAAGCTGCTTTTGGTCTAGTGTGTGCCACTTGTGAACAGATTGCTGATTCACAGCATCG
GTCTCACAGACAAATGGCTACTACCACCAATCCACTAATCAGGCATGAAAACAGAATGGTGCTGGCTAGCAC
TACGGCAAAGGCTATGGAACAGATGGCTGGATCGAGTGAACAGGCAGCAGAGGCCATGGAGGTTGCTAATCA
AACTAGGCAGATGGTACATGCAATGAGAACCATTGGGACTCATCCTAGCTCCAGTGCTGGTCTGAAAGATGA
CCTTCTTGAAAATTTGCAGGCCTACCAGAAGCGAATGGGAGTGCAGATGCAGCGATTCAAATGATCCTCTCG
TCATTGCAGCAAATATCATTGGGATCTTGCACCTGATATTGTGGATTACTGATCGTCTTTTCTTCAAATGTA
TTTATCGTCGCTTTAAATACGGTTTGAAAAGAGGGCCTTCTACGGAAGGAGTGCCTGAGTCCATGAGGGAAG
AATATCAACAGGAGCAGCAGAGTGCTGTGGATGTTGACGATGGTCATTTTGTCAACATAGAGCTAGAGTAA-
-------------------
>A/swine/Indiana/A02154756/2018/1-982
-------------------------ATGAGTCTTCTAACCGAGGTCGAAACGTACGTTCTTTCTATCATACC
GTCAGGCCCCCTCAAAGCCGAGATTGCGCAGAGACTGGAAAGTGTCTTTGCAGGGAAGAACACAGATCTTGA
GGTTCTCATGGAATGGCTAAAGACAAGACCAATCTTGTCACCTCTGACTAAGGGAATTTTAGGATTTGTGTT
CACGCTCACCGTGCCCAGTGAGCGAGGACTGCAGCGTAGACGCTTTGTCCAAAATGCCCTGAATGGGAATGG
GGACCCAAACAACATGGATAGAGCAGTTAAACTATACAAGAAGCTCAAAAGAGAAATAACGTTCCATGGGGC
CAAGGAGGTGTCATTAAGCTATTCAACTGGTGCACTTGCCAGTTGCATGGGCCTCATATACAACAGGATGGG
AACAGTGACCACAGAAGCTGCTTTTGGTCTAGTGTGTGCCACTTGTGAACAGATTGCTGATTCACAGCATCG
GTCACACAGACAAATGGCTACAACCACCAATCCACTAATCAGGCATGAGAACAGAATGGTGCTGGCTAGCAC
TACGGCAAAGGCTATGGAACAGATGGCTGGATCGAGTGAACAGGCAGCGGAGGCCATAGAGGTCGCTAATCA
GACTAGACAGATGGTACATGCAATGAGAACTATTGGGACTCATCCTAGCTCCAGTACTGGTCTGAAAGATGA
CCTTCTTGAAAATTTGCAGGCCTACCAGAAGCGAATGGGAGTGCAAATGCAGCGATTCAAGTAATCCTCTCG
CCATTGCAGCAAATATCATTGGGATCTTGCACCTGACATTGTGGATTACTGATCGTCTTTTTTTCAAATGTA
TTTATCGTCGCTTTAAATACGGTTTGAAAAGAGGGCCTTCTACGGAAGGAGTGCCTGAGTCCATGAGGGAAG
AATATCAACAGGAACAGCAGAGTGCTGTGGATGTTGACGATGGTCATTTTGTCAACATAGAGCTAGAGTAA-
-------------------
>A/swine/North_Carolina/A02142598/2018/1-982
-------------------------ATGAGTCTTCTAACCGAGGTCGAAACGTACGTTCTTTCTATCATCCC
GTCAGGCTCCCTCAAAGCCGAGATCGCGCAGAGACTGGAAAGTGTTTTCTCAGGGAAGAGCGCAGATCTTGA
GGCTCTCATGGAATGGCTAAAGACAAGACCAATCTTGTCACCTCTGACTAAGGGGATTTTAGGATTTGTGTT
CACGCTCACCGTGCCCAGTGAGCGAGGACTGCAGCGTAGACGCTTTGTCCAAAATGCCCTAAATGGGAATGG
GGACCCGAACAACATGGATAGAGCAGTTAAACTATACAAGAAGCTCAAAAGAGAAATAACGTTCCATGGGGC
CAAGGAGGTGTCACTAAGCTATTCAACTGGTGCACTTGCCAGTTGCATGGGCCTCATATACAACAGAATGGG
AACAGTGACCACAGAAGCTGCTTTTGGTCTAGTGTGTGCCACTTGTGAACAGATTGCTGATTCACAGCATCG
GTCTCACAGACAAATGGCTACTACCACCAATCCACTAATCAGGCATGAAAACAGAATGGTGCTGGCTAGCAC
TACGGCAAAGGCTATGGAACAGATGGCTGGATCGAGTGAACAGGCAGCAGAGGCCATGGAGGTTGCTAATCA
AACTAGGCAGATGGTACATGCAATGAGAACCATTGGGACTCATCCTAGCTCCAGTGCTGGTCTGAAAGATGA
CCTTCTTGAAAATTTGCAGGCCTACCAGAAGCGAATGGGAGTGCAGATGCAGCGATTCAAATGATCCTCTCG
TCATTGCAGCAAATATCATTGGGATCTTGCACCTGATATTGTGGATTACTGATCGTCTTTTCTTCAAATGTA
TTTATCGTCGCTTTAAATACGGTTTGAAAAGAGGGCCTTCTACGGAAGGAGTGCCTGAGTCCATGAGGGAAG
AATATCAACAGGAACAGCAGAGTGCTGTGGATGTTGACGATGGTCATTTTGTCAACATAGAGCTAGAGTAA-
-------------------
>A/swine/Iowa/A02142465/2018/1-982
-------------------------ATGAGTCTTCTAACCGAGGTCGAAACGTACGTTCTTTCTATCATCCC
GTCAGGCCCCCTCAAAGCCGAGATCGCGCAGAGACTGGAAAGTGTCTTTGCAGGAAAGAACACAGATCTTGA
GGCTCTCATGGAATGGTTAAAGACAAGACCAATCTTGTCACCTCTGACTAAGGGAATTTTAGGATTTGTGTT
CACGCTCACCGTGCCCAGTGAGCGAGGACTGCAGCGTAGACGCTTTGTCCAAAATGCCCTAAATGGGAATGG
GGACCCGAACAACATGGATAGAGCAGTTAAATTATACAAGAAGCTCAAAAGAGAAATAACGTTCCATGGGGC
TAAGGAAGTGTCACTAAGCTATTCAACTGGTGCACTTGCCAGTTGCATGGGCCTCATATACAACAGGATGGG
AACAGTGACCACAGAAGCTGCTTTTGGTCTGGTGTGTGCCACTTGTGAACAGATTGCTGATTCACAGCATCG
GTCTCACAGACAAATGGCTACTACCACCAATCCACTAATCAGGCATGAAAACAGAATGGTGCTGGCTAGCAC
TACTGCAAAGGCTATGGAACAGATGGCTGGATCGAGTGAACAGGCAGCAGAGGCCATGGAGGTTGCTAATCA
GACTAGGCAGATGGTACATGCAATGAGAACTATTGGGACTCATCCTAGCTCCAGTGCTGGTCTGAAAGATGA
CCTTCTTGAAAATTTACAGGCCTATCAGAAGCGAATGGGAGTGCAGATGCAGCGATTCAAGTGATCCTCTCT
CCATTGCCGCAAACATCATTGGGATCTTGCACCTGATATTGTGGATTACTGATCGTCTTTTTTTCAAATGTA
TTTATCGTCGCTTTAAATACGGTTTGAAAAGAGGGCCTTCTACAGAAGGAGTGCCTGAGTCCATGAGGGAAG
AATATCAGCAGGAACAGCAGAGTGCTGTGGATGTTGACGATGGTCATTTTGTCAACATAGAGCTAGAGTAA-
-------------------
>A/swine/Indiana/A01812258/2017/1-982
-------------------------ATGAGTCTTCTAACCGAGGTCGAAACGTACGTTCTTTCTATCATACC
GTCAGGCCCCCTCAAAGCCGAGATTGCGCAGAGACTGGAAAGTGTCTTTGCAGGAAAGAATACAGACCTTGA
GGCTCTCATGGAATGGCTAAAGACAAGACCAATCTTGTCACCTTTGACTAAGGGAATTTTAGGATTTGTGTT
CACGCTCACCGTGCCCAGTGAGCGAGGACTGCAGCGTAGACGCTTTGTCCAAAATGCCCTGAATGGGAATGG
GGACCCAAACAACATGGATAGAGCAGTTAAACTATACAAGAAACTCAAAAGAGAAATAACGTTCCATGGGGC
CAAGGAGGTGTCACTAAGCTATTCAACTGGTGCACTTGCCAGTTGCATGGGCCTCATATACAACAGGATGGG
AACAGTGACCACAGAAGCTGCTTTTGGTCTAGTGTGTGCCACTTGTGAACAGATTGCTGATTCACAGCATCG
GTCTCACAGACAGATGGCTACAACCACCAATCCACTAATCAGACATGAGAACAGAATGGTGCTGGCTAGCAC
TACGGCAAAGGCTATGGAACAAATGGCTGGATCGAGTGAACAGGCAGCGGAGGCCATGGAGGTTGCTAATCA
AACTAGGCAGATGGTACATGCAATGAGAACTATTGGGACTCATCCCAGTTCCAGTACTGGTCTGAAAGATGA
CCTTCTTGAAAATTTGCAGGCCTATCAGAAGCGAATGGGAGTGCAGATGCAGCGGTTTAAGTGATCCTCTCG
CCATTGCAGCAAATATCATTGGGATCTTGCACCTGATATTGTGGATTACTGATCGTCTTTTTTTCAAATGTA
TTTATCGTCGCTTTAAATACGGTTTGAAAAGAGGGCCTTCTACGGAAGGAGTGCCTGAGTCCATGAGGGAAG
AATATCAACAGGAACAGCAGAGTGCTGTGGATGTTGACGATAGTCATTTTGTCAACATAGAGCTGGAGTAA-
-------------------
>A/swine/Indiana/A01812256/2017/1-982
-------------------------ATGAGTCTTCTAACCGAGGTCGAAACGTACGTCCTTTCTATCATACC
GTCAGGGCCCCTCAAAGCCGAGATCGCGCAGAGACTGGAAAGTGTATTTGCAGGAAAGAACACAGATCTTGA
GGCTCTCATGGAATGGCTAAAGACAAGACCAATCTTGTCACCTCTGACTAAAGGGATTTTAGGATTTGTGTT
CACGCTCACCGTGCCCAGTGAGCGAGGACTGCAGCGTAGACGCTTTGTCCAAAATGCCCTAAATGGAAATGG
GGACCCAAACAACATGGATAGAGCAGTTAAACTGTACAAGAAGCTCAAAAGAGAAATAACGTTCCATGGGGC
CAAGGAGGTGTCACTAAGCTATTCAACTGGTGCACTTGCCAGTTGCATGGGCCTCATATACAACAGGATGGG
AACAGTGACCACAGAAGCTGCTTTTGGTCTAGTGTGTGCCACTTGTGAACAGATTGCTGAGTCTCAGCATCG
GTCTCACAGACAGATGGCTACTACCACCAATCCACTAATCAGGCATGAGAACAGAATGGTGCTAGCTAGCAC
TACGGCAAAGGCTATGGAACAGATAGCTGGATCGAGTGAACAGGCAGCGGAGGCCATGGAGGTTGCTAATCA
GACTAGGCAGATGGTACATGCAATGAGAACTATTGGGACTCATCCTAGCTCCAGTACTGGTCTGAAAGATGA
CCTTCTTGAAAATTTGCAGGCCTACCAGAAGCGGATGGGAGTGCAGATGCAGCGATTCAAGTGATTCTCTCG
CCGTTGCAGCAAATATCATTGGGATCTTGCACCTGATATTGTGGATTATTGATCGTCTTTTTTTCAAATGTA
TTTACCGTCGCTTTAAATACGGTTTGAAAAGAGGGCCTTCTACGGAAGGAGTGCCTAAGTCCATGAGGGAAG
AATATCAACAGGAACAGCAGAGTGCTGTGGATGTTGACGATGGTCATTTTGTCAACATAGAGCTAGAGTAA-
-------------------
>A/swine/Indiana/A01812260/2017/1-982
-------------------------ATGAGTCTTCTAACCGAGGTCGAAACGTACGTTCTTTCTATCATACC
GTCAGGCCCCCTCAAAGCCGAGATCGCGCAGAGACTGGAAAGTGTCTTTGCAGGAAAGAATACAGACCTTGA
GGCTCTCATGGAATGGCTAAAGACAAGACCAATCTTGTCACCTTTGACTAAGGGAATTTTAGGATTTGTGTT
CACGCTCACCGTGCCCAGTGAGCGAGGACTGCAGCGTAGACGCTTTGTCCAAAATGCCCTGAATGGGAATGG
GGACCCAAACAACATGGATAGAGCAGTTAAACTATACAAGAAGCTCAAAAGAGAAATAACGTTCCATGGGGC
CAAGGAGGTGTCACTAAGCTATTCAACTGGTGCACTTGCCAGTTGCATGGGCCTCATATACAACAGGATGGG
AACAGTGACCACGGAAGCTGCTTTTGGTCTAGTGTGTGCCACTTGTGAACAGATTGCTGATTCACAGCATCG
GTCCCACAGACAGATGGCTACAACCACCAATCCACTAATCAGGCATGAGAACAGAATGGTGCTGGCTAGCAC
TACGGCAAAGGCTATGGAGCAGATGGCTGGATCGAGTGAACAGGCAGCGGAGGCCATGGAGGTTGCTAATCA
GACTAGGCAGATGGTACATGCAATGAGAACTATTGGGACTCATCCTAGTTCCAGTACTGGTCTGAAAGATGA
CCTTCTTGAAAATTTGCAGGCCTATCAGAAGCGAATGGGAGTGCAGATGCAGCGGTTTAAGTGATCCTCTCG
CCATTGCAGCAAATATCATTGGGATCCTGCACCTGATATTGTGGATTACTGATCGTCTTTTTTTCAAATGTA
TTTATCGTCGCTTTAAATACGGTTTGAAAAGAGGGCCTTCTACGGAAGGAGTGCCTGAGTCCATGAGGGAAG
AATATCAACAGGAACAGCAGAGTGCTGTGGATGTTGACGATGGTCATTTTGTCAACATAGAGCTGGAGTAA-
-------------------
>A/swine/Indiana/A01812257/2017/1-982
-------------------------ATGAGTCTTCTAACCGAGGTCGAAACGTACGTTCTTTCTATCATACC
GTCAGGCCCCCTCAAAGCCGAGATTGCGCAGAGACTGGAAAGTGTCTTTGCAGGAAAGAATACAGACCTTGA
GGCTCTCATGGAATGGCTAAAGACAAGACCAATCTTGTCACCTTTGACTAAGGGAATTTTAGGATTTGTGTT
CACGCTCACCGTGCCTAGTGAGCGAGGACTGCAGCGTAGACGCTTTGTCCAAAATGCCCTGAATGGGAATGG
GGACCCAAACAACATGGATAGAGCAGTTAAACTATACAAGAAGCTCAAAAGAGAAATAACGTTCCATGGGGC
CAAGGAGGTGTCACTAAGCTATTCAACTGGTGCACTTGCCAGTTGCATGGGCCTCATATACAACAGGATGGG
AACGGTGACCACAGAAGCTGCTTTTGGTCTAGTGTGTGCCACTTGTGAACAGATTGCTGATTCACAGCATCG
GTCTCACAGACAGATGGCTACCACCACCAATCCACTAATCAGGCATGAGAACAGAATGGTGCTGGCTAGCAC
TACGGCAAAGGCTATGGAACAGATGGCTGGATCGAGTGAACAGGCAGCGGAGGCCATGGAGGTTGCTAATCA
GACTAGGCAGATGGTGCATGCAATGAGAACTATTGGGACTCATCCTAGTTCCAGTACTGGTCTGAAAGATGA
CCTTCTTGAAAATTTGCAGGCCTATCAGAAGCGAATGGGAGTGCAGATGCAGCGGTTTAAGTGATCCTCTCG
CCCTTGCAGCAAATATCATTGGGATCTTGCACCTGATATTGTGGATTACTGATCGTCTTTTTTTCAAATGTA
TTTATCGTCGCTTTAAATACGGTTTGAAAAGAGGGCCTTCTACGGAAGGAGTGCCTGAGTCCATGAGGGAAG
AATATCAACAGGAACAGCAGAGTGCTGTGGATGTTGACGATGGTCATTTTGTCAACATAGAGCTGGAGTAA-
-------------------
>A/swine/Illinois/A02157797/2018/1-982
-------------------------ATGAGTCTTCTAACCGAGGTCGAAACGTACGTTCTTTCTATCATACC
GTCAGGCCCCCTCAAAGCCGAGATCGCGCAGAGACTGGAAAGTGTCTTTGCAGGGAAAAACACAGATCTTGA
AGCTCTCATGGAATGGCTAAAGACAAGACCAATCTTGTCACCTCTGACTAAGGGAATTTTAGGATTTGTGTT
CACGCTCACCGTGCCCAGTGAGCGAGGACTGCAGCGTAGACGCTTTGTCCAAAATGCCCTGAATGGGAATGG
GGACCCAAACAACATGGATAGAGCAGTTAAACTATACAAGAAGCTCAAAAGAGAAATAACATTCCATGGGGC
CAAGGAGGTGTCACTAAGCTATTCAACTGGTGCACTTGCCAGTTGCATGGGCCTCATATACAACAGGATGGG
AACAGTGACCACAGAAGCTGCTTTTGGTCTAGTGTGTGCAACTTGTGAACAGATTGCTGATTCACAGCATCG
GTCTCACAGACAGATGGCTACAACCACCAATCCACTAATCAGGCATGAGAACAGAATGGTGCTGGCTAGCAC
TACGGCAAAGGCTATGGAACAGATGGCTGGATCGAGTGAACAGGCAGCGGAGGCCATGGAGGTTGCTAATCA
GACTAGGCAGATGGTACATGCAATGAGAACTATTGGGACTCATCCTAGCTCCAGTACTGGTCTGAAAGATGA
CCTTCTTGAAAATTTGCAGGCCTACCAGAAGCGAATGGGAGTGCAGATGCAGCGATTCAAGTGATCCTCTCG
CCATTGCAGCAAATATCATTGGGATATTGCACCTGATATTGTGGATTGCTGATCGTCTTTTTTTCAAATGTA
TTTATCGTCGCTTTAAATACGGTTTGAAAAGAGGGCCTTCAACGGAAGGAGTGCCTGAGTCCATGAGGGAAG
AATACCAACAGGAACAGCAGAGTGCTGTGGATGTTGACGATGGTCATTTTGTCAACATAGAGCTAGAGTAA-
-------------------
>A/swine/South_Dakota/A02156993/2018/1-982
-------------------------ATGAGTCTTCTAACCGAGGTCGAAACGTACGTTCTTTCTATCATCCC
GTCAGGCTCCCTCAAAGCCGAGATCGCGCAGAGACTGGAAAGTGTTTTTTCAGGAAAGAACACAGATCTTGA
GGCTCTCATGGAATGGCTAAAGACAAGACCAATCTTGTCACCTCTGACTAAGGGGATTTTAGGATTTGTGTT
CACGCTCACCGTGCCCAGTGAGCGAGGACTGCAACGTAGACGCTTTGTTCAAAATGCCCTAAATGGGAATGG
GGACCCGAACAACATGGATAGAGCAGTTAAACTATACAAGAAGCTCAAAAGGGAAATAACGTTCCATGGGGC
CAAGGAGGTGTCACTAAGCTATTCAACTGGTGCACTTGCCAGTTGCATGGGCCTCATATACAACAGGATGGG
AACAGTGACCACAGAAGCCGCTCTTGGTCTAGTGTGTGCCACTTGTGAGCAGATTGCTGATTCACAGCATCG
GTCTCACAGACAAATGGCTACTACCACCAACCCACTAATCAGGCATGAAAACAGAATGGTGCTGGCTAGCAC
TACGGCAAAGGCTATGGAACAGATGGCTGGATCGAGTGAACAGGCAGCAGAGGCCATTGAGGTTGCTAATCA
AACTAGGCAGATGGTGCATGCAATGAGAACTATTGGGACTCATCCTAGCTCCAGCGCTGGTCTGAAAGATGA
CCTTCTTGAAAATTTGCAGGCCTACCAGAAGCGAATGGGAGTGCAGATGCAGCGATTCAAATGATCCTCTCG
CCATTGCAGCAAATATCATTGGGATCTTGCACCTGATATTGTGGATTACTGATCGTCTTTTTTTCAAATGTA
TTTATCGTCGCTTTAAATACGGTTTGAAAAGAGGGCCTTCTACGGAAGGAGTGCCTGAGTCCATGAGGGAAG
AATATCAACAAGAACAGCAGAGTGCTGTGGATGTTGACGATGGTCATTTTGTCAACATAGAGCTAGAGTAA-
-------------------
>A/swine/Tennessee/A02157798/2018/1-982
-------------------------ATGAGTCTTCTAACCGAGGTCGAAACGTACGTTCTTTCTATCATCCC
GTCAGGCTCCCTCAAAGCCGAGATCGCGCAGAGACTGGAAAGTGTTTTCTCAGGAAAGAGCGCAGATCTTGA
GGCTCTCATGGAATGGCTAAAGACAAGACCAATCTTGTCACCTCTGACTAAGGGGATTTTAGGATTTGTGTT
CACGCTCACCGTGCCCAGTGAGCGAGGACTGCAGCGTAGACGCTTTGTCCAAAATGCCCTAAATGGGAATGG
GGACCCGAACAACATGGATAGAGCAGTTAAACTATACAAGAAGCTCAAAAGAGAAATAACGTTCCATGGGGC
CAAGGAGGTGTCACTAAGCTATTCAACTGGTGCACTTGCCAGTTGCATGGGCCTCATATACAACAGAATGGG
AACAGTGACCACAGAAGCTGCTTTTGGTCTAGTGTGTGCCACTTGTGAACAGATTGCTGATTCACAGCATCG
GTCTCACAGACAAATGGCTATTACCACCAATCCACTAATCAGGCATGAAAACAGAATGGTGCTGGCTAGCAC
TACGGCAAAGGCTATGGAACAGATGGCTGGATCGAGTGAACAGGCAGCAGAGGCCATGGAGGTTGCTAATCA
AACTAGGCAGATGGTACATGCAATGAGAACCATTGGGACTCATCCTAGCTCCAGTGCTGGTCTGAAAGATGA
CCTTCTTGAAAATTTGCAGGCCTACCAGAAGCGAATGGGAGTGCAGATGCAGCGATTCAAATGATCCTCTCG
TCATTGCAGCAAATATCATTGGGATCTTGCACCTGATATTGTGGATTACTGATCGTCTTTTCTTCAAATGTA
TTTATCGTCGCTTTAAATACGGTTTGAAAAGGGGGCCTTCTACGGAAGGAGTGCCTGAGTCCATGAGGGAAG
AATATCAACAGGAACAGCAGAGTGCTGTGGATGTTGACGATGGTCATTTTGTCAACATAGAGCTAGAGTAA-
-------------------
>A/swine/Michigan/A01104117/2018/1-982
-------------------------ATGAGTCTTCTAACCGAGGTCGAAACGTACGTTCTTTCTATCATACC
GTCAGGCCCCCTCAAAGCCGAGATTGCGCAGAGACTGGAAAGTGTCTTTGCAGGAAAGAATACAGACCTTGA
GGCTCTCATGGAATGGCTAAAGACAAGACCAATCTTGTCACCTTTGACTAAGGGAATTTTAGGATTTGTGTT
CACGCTCACCGTGCCCAGTGAGCGAGGACTGCAGCGTAGACGCTTTGTCCAAAATGCCCTGAATGGGAATGG
GGACCCAAACAACATGGACAGAGCAGTCAAACTATACAAGAAGCTCAAAAGAGAAATAACGTTCCATGGGGC
CAAGGAGGTGTCACTAAGCTATTCAACTGGTGCACTTGCCAGTTGCATGGGCCTCATATACAACAGGATGGG
AACAGTGACCACAGAAGCTGCTTTTGGTCTAGTGTGTGCCACTTGTGAACAGATTGCTGATTCACAGCATCG
GTCTCACAGACAGATGGCTACCACCACCAATCCACTAATCAGGCATGAGAACAGAATGGTGCTGGCTAGCAC
TACGGCAAAGGCTATGGAACAGATGGCTGGATCGAGTGAACAGGCAGCGGAGGCCATGGAGGTTGCTAATCA
GACTAGGCAGATGGTGCATGCAATGAGAACTATTGGGACTCATCCTAGTTCCAGTACTGGTCTGAAAGATGA
CCTTCTTGAAAATTTGCAGGCCTATCAGAAGCGAATGGGAGTGCAGATGCAGCGGTTTAAGTGATCCTCTCG
CCATTGCAGCAAATATCATTGGGATCTTGCACCTGATATTGTGGATTACTGATCGTCTTTTTTTCAAATGTG
TTTATCGTCGCTTTAAATACGGTTTGAAAAGAGGGCCTTCTACGGAAGGAGTGCCTGAGTCCATGAGGGAAG
AATATCAACAGGAACAGCAGAGTGCTGTGGATGTTGACGATGGTCATTTTGTCAACATAGAGCTGGAGTAA-
-------------------
>A/swine/Nebraska/A02157330/2018/1-982
-------------------------ATGAGTCTTCTAACCGAGGTCGAAACGTACGTTCTTTCTATCATCCC
GTCAGGCCCCCTCAAAGCCGAGATCGCGCAGAGACTGGAAAGTGTATTTGCAGGAAAGAACACAGATCTTGA
GGCTCTCATGGAATGGCTAAAGACAAGACCAATCTTGTCACCTCTGACTAAGGGAATTTTAGGATTTGTGTT
CACGCTCACCGTGCCCAGTGAGCGAGGACTGCAGCGTAGACGCTTTGTCCAAAATGCCCTAAATGGGAATGG
GGACCCGAACAACATGGATAGAGCAGTTAAACTATACAAGAAGCTCAAAAGAGAAATAACGTTCCATGGGGC
CAAGGAGGTGTCACTAAGCTATTCAACTGGTGCACTTGCTAGTTGCATGGGCCTCATATACAACAGGATGGG
AACAGTGACCACAGAAGCTGCTTTTGGTCTAGTGTGTGCCACCTGTGAACAGATTGCTGATTCACAGCATCG
ATCTCACAGACAAATGGTTACTACCACCAATCCACTAATCAGGCATGAAAACAGAATGGTGCTGGCTAGCAC
TACTGCAAAGGCTATGGAACAGATGGCTGGATCGAGTGAACAGGCAGCAGAGGCCATGGAGGTTGCTAATCA
GACTAGGCAGATGGTACATGCAATGAGAACTATTGGGACTCATCCTAGCTCCAGTGCTGGTCTGAAGGATGA
CCTTCTTGAAAATTTACAGGCCTACCAGAAGCGAATGGGAGTGCAAATGCAGCGATTCAAGTGATCCTCTCG
TCATTGCAGCAAATATCATTGGGATCTTGCACCTGATATTGTGGATTACTGATCGTCTTTTTTTCAAATGTA
TTTATCGTCGCTTTAAATACGGTTTGAAAAGAGGGCCTCCTACGGAAGGAGTGCCTGAGTCCATGAGGGAAG
AATATCAACAGGAACAGCAGAGTGCTGTGGATGTTGACGATGGTCATTTTGTCAACATAGAGCTAGAGTAA-
-------------------
>A/swine/North_Carolina/A02155541/2018/1-982
-------------------------ATGAGTCTTCTAACCGAGGTCGAAACGTACGTTCTTTCTATCATACC
GTCAGGCCCCCTCAAAGCCGAGATTGCGCAGAGACTGGAAAGTGTCTTTGCAGGAAAGAATACAGACCTTGA
GGCTCTCATGGAATGGCTAAAGACAAGACCAATCTTGTCACCTTTGACTAAGGGAATTTTAGGATTTGTGTT
CACGCTCACCGTGCCCAGTGAGCGAGGACTGCAGCGTAGACGCTTTGTCCAAAATGCCCTGAATGGGAATGG
GGACCCAAACAACATGGATAGAGCAGTTAAACTATACAAGAAGCTCAAAAGAGAAATAACGTTCCATGGGGC
CAAGGAGGTGTCACTAAGCTATTCAACTGGTGCACTTGCCAGTTGCATGGGCCTCATATACAACAGGATGGG
AACAGTGACCACAGAAGCTGCTTTTGGTCTAGTGTGTGCCACTTGTGAACAGATTGCTGATTCACAGCATCG
GTCTCACAGACAGATGGCTACAACCACCAATCCACTAATCAGACATGAGAACAGAATGGTGCTGGCTAGCAC
TACGGCAAAGGCTATGGAACAGATGGCTGGATCAAGTGAACAGGCAGCGGAGGCCATGGAGATTGCTAATCA
GACTAGGCAGATGGTACATGCAATGAGAACTATTGGGACTCATCCTAGTTCCAGTACTGGTCTGAAAGATGA
CCTTCTTGAAAATTTGCAGGCCTATCAGAAACGAATGGGAGTGCAGATGCAGCGGTTTAAGTGATCCACTCG
CCATTGCAGCAAATATCATCGGGATCTTGCACCTGATATTGTGGATTACTGATCGTCTTTTTTTCAAATGTA
TTTATCGTCGCTTTAAATACGGTTTGAAAAGAGGGCCTTCTACGGAAGGAGTGCCTGAGTCCATGAGGGAAG
AATATCAACAGGAACAGCAGAGTGCTGTGGATGTTGACGATGGTCATTTTGTCAACATAGAGCTGGAGTAA-
-------------------
>A/swine/Minnesota/A01785575/2018/1-982
-------------------------ATGAGTCTTCTAACCGAGGTCGAAACGTACGTTCTTTCTATCATACC
GTCAGGCCCCCTCAAAGCCGAGATTGCGCAGAGACTGGAAAGTGTCTTTGCAGGAAAGAATACAGACCTTGA
GGCTCTCATGGAATGGCTAAAGACAAGACCAATCTTGTCACCTTTGACTAAGGGAATTTTAGGATTTGTGTT
CACGCTCACCGTGCCCAGTGAGCGAGGACTGCAGCGTAGACGCTTTGTCCAAAATGCCCTGAATGGGAATGG
GGACCCAAACAACATGGATAGAGCAGTTAAACTATACAAGAAGCTCAAAAGAGAAATAACGTTCCATGGGGC
CAAGGAGGTGTCACTAAGCTATTCAACTGGTGCACTTGCCAGTTGCATGGGCCTCATATACAACAGAATGGG
AACAGTGACCGCAGAAGCTGCTTTTGGTCTAGTGTGTGCCACTTGTGAACAGATTGCTGACTCACAGCATCG
GTCTCACAGACAGATGGCTACAACCACCAATCCACTAATCAGGCATGAGAACAGAATGGTGCTGGCTAGCAC
CACGGCAAAGGCTATGGAACAGATGGCTGGATCGAGTGAACAGGCAGCGGAGGCCATGGAGGTTGCCAATCA
GACTAGGCAGATGGTACATGCAATGAGAACTATTGGGACTCATCCTAGTTCCAGTACTGGTCTGAAAGATGA
CCTTCTTGAAAATTTGCAGGCCTATCAGAAACGAATGGGAGTGCAGATGCAGCGGTTTAAGTGATCCTCTCG
CCATTGCAGCAAATATCATTGGGATATTGCACCTGATATTGTGGATTACAGATCGTCTTTTTTTCAAATGTA
TTTATCGTCGCTTTAAATACGGTTTGAAAAGAGGGCCTTCTACGGAAGGAGTGCCTGAGTCCATGAGGGAAG
AATATCAACAGGAACAGCAGAGTGCTGTGGATGTTGACGATGGTCATTTTGTCAACATAGAGCTGGAGTAA-
-------------------
>A/swine/Oklahoma/A02156988/2018/1-982
-------------------------ATGAGTCTTCTAACCGAGGTAGAAACGTACGTTCTTTCTATCATCCC
GTCAGGCCCCCTCAAAGCCGAGATCGCACAGAGACTGGAAAGTGTTTTTTCAGGGAAAAATACAGATCTTGA
GGCTCTCATGGAATGGCTAAAGACAAGACCAATCTTGTCACCTCTGACTAAGGGGATTTTAGGATTTGTGTT
CACGCTCACCGTGCCCAGTGAGCGAGGACTGCAGCGTAGACGCTTTGTCCAAAATGCCCTAAATGGAAATGG
GGACCCGAACAACATGGATAGAGCAGTTAAACTATACAAGAAGCTCAAAAGAGAAATAACGTTCCATGGGGC
CAAGGAGGTGTCACTAAGCTATTCAACTGGTGCACTTGCCAGTTGCATGGGCCTCATATACAACAGGATGGG
AACAGTGACCACAGAAGCTGCTTTTGGTCTGGTGTGTGCCACTTGTGAACAGATTGCTGATTCACAGCATCG
GTCTCACAGACAAATGGCTACTACCACCAATCCACTAATCAGGCATGAAAACAGAATGGTGCTGGCTAGCAC
TACGGCAAAGGCTATGGAACAGATGGCTGGATCGAGTGAACAGGCAGCAGAGGCCATGGAGGTTGCTAATCA
AACTAGGCAGATGGTACATGCAATGAGAACTATTGGGACTCATCCTAGCTCCAGTGCTGGTCTGAAAGATGA
CCTTCTTGAAAATTTGCAGGCCTACCAGAAACGAATGGGAGTGCAGATGCAGCGATTCAAGTGATCCTCTCG
TCATTGCAGCAAATATCATTGGGATCTTGCACCTGATATTGTGGATTACTGATCGTCTTTTTTTCAAATGTA
TTTATCGTCGCTTTAAATACGGTTTGAAAAGAGGGCCTTCTACGGAAGGAGTGCCTGATTCCATGAGGGAAG
AATATCAACAGGAACAGCAGAGTGCTGTGGATGTTGACGATGGTCATTTTGTCAACATAGAGCTAGAGTAA-
-------------------
>A/swine/Minnesota/A02156983/2018/1-982
-------------------------ATGAGTCTTCTAACCGAGGTCGAAACGTACGTTCTTTCTATCATACC
GTCAGGCCCCCTCAAAGCCGAGATCGCGCAGAGACTGGAAAGTGTCTTTGCAGGAAAGAATACAGACCTTGA
GGCTCTCATGGAATGGCTAAAGACAAGACCAATCTTGTCACCTTTGACTAAGGGAATTTTGGGATTTGTGTT
CACGCTCACCGTGCCCAGTGAGCGAGGACTGCAGCGTAGACGCTTTGTCCAAAATGCCCTGAATGGGAATGG
GGACCCAAACAACATGGATAAAGCAGTTAAACTATACAAGAAGCTCAAAAGAGAAATAACATTCCATGGGGC
CAAGGAGGTGTCACTAAGCTATTCAACTGGTGCACTTGCCAGCTGCATGGGCCTCATATACAACAGGATGGG
AACAGTGACCACAGAAGCTGCTTTTGGTCTAGTGTGTGCCACTTGTGAACAGATTGCTGATTCACAGCATCG
GTCTCACAGACAGATGGCTACAACCACCAATCCACTAATCAGGCATGAGAACAGAATGGTGCTGGCTAGCAC
TACGGCAAAGGCCATGGAACAGATGGCTGGATCGAGTGAACAGGCAGCGGAGGCCATGGAGGTTGCTAATCA
GACTAGGCAGATGGTACATGCAATGAGAACTATTGGGACTCATCCTAGTTCCAGTACTGGTCTGAAAGATGA
CCTTCTTGAAAATTTGCAGGCCTATCAGAAGCGAATGGGAGTGCAGATGCAGCGGTTTAAGTGATCCTCTCG
CCATTGCAGCAAATATCATTGGGATCTTGCACCTGATATTGTGGATTACTGATCGTCTTTTTTTCAAATGTA
TTTATCGTCGCTTTAAATACGGTTTGAAAAGAGGGCCTTCTACGGAAGGAGTGCCTGAGTCCATGAGGGAAG
AATATCAACAGGAACAGCAGAGTGCTGTGGATGTTGACGATGGTCATTTTGTCAACATAGAGCTGGAGTAA-
-------------------
>A/swine/Oklahoma/A02157314/2018/1-982
-------------------------ATGAGTCTTCTAACCGAGGTCGAAACGTACGTTCTTTCTATCATCCC
ATCAGGCCCCCTCAAAGCCGAGATCGCGCAGAGACTGGAGAGTGTCTTTGCAGGAAAGAACACAGATCTTGA
GGCTCTCATGGAATGGCTAAAGACAAGACCAATCTTGTCACCTTTGACTAAGGGAATTTTAGGATTTGTGTT
CACGCTCACCGTGCCCAGTGAGCGAGGACTACAGCGTAGACGCTTTGTCCAAAATGCCCTAAATGGGAATGG
GGACCCGAACAACATGGATAGAGCAGTCAAACTATACAAGAAGCTCAAAAGAGAAATAACATTCCATGGGGC
CAAGGAGGTGTCACTAAGCTATTCAACTGGTGCACTTGCCAGTTGCATGGGTCTCATATATAACAGAATGGG
GACAGTGACCACAGAAGCTGCTTTTGGTCTAGTATGTGCCACTTGTGAACAGATTGCTGATTCACAGCATCG
GTCTCACAGACAAATGGCCACCACCACCAATCCACTAATCAGGCATGAAAACAGAATGGTGCTGGCTAGCAC
TACGGCAAAGGCTATGGAACAGATGGCTGGATCGAGTGAACAGGCAGCAGAGGCCATGGAGGTTGCTAATCA
GACTAGGCAGATGGTACATGCAATGAGGACTATTGGGACTCATCCTAGCTCCAGTGCTGGTCTGAAAGATGA
CCTTCTTGAAAATTTGCAGGCCTACCAGAAACGAATGGGAGTGCAGATGCAGCGATTCAAGTGATCCTCTCG
CCATTGCAGCAAATATCATTGGAATATTGCACCTGATATTGTGGATTACAGATCGTCTTTTTTTCAAATGCA
TTTATCGTCGCTTTAAATACGGGTTGAAAAGAGGGCCTTCTACGGAAGGAGTGCCTGAGTCCATGAGGGAAG
AATATCAACAGGAACAGCAGAGTGCGGTGGATGTTGACGATGGTCATTTTGTCAACATAGAGCTAGAGTAA-
-------------------
>A/swine/Colorado/A02155470/2018/1-982
-------------------------ATGAGTCTTCTAACCGAGGTCGAAACGTATGTTCTTTCTATCGTCCC
GTCAGGCCCCCTCAAAGCCGAGATCGCGCAGAGACTGGAAAGTGTCTTTGCAGGAAAGAACACAGATCTTGA
GGCTCTAATGGAATGGCTAAAGACAAGACCAATCTTGTCACCTCTGACTAAGGGAATTTTAGGGTTTGTGTT
CACGCTCACCGTGCCCAGTGAGCGAGGACTGCAGCGTAGACGCTTTGTCCAAAATGCCCTAAATGGGAATGG
GGACCCGAACAACATGGATAGAGCAGTTAAACTATACAAGAAACTCAAAAGAGAAATAACGTTCCATGGGGC
CAAGGAGGTGTCACTAAGCTATTCAACTGGTGCACTTGCCAGTTGCATGGGCCTCATATACAACAGGATGGG
AACAGTGACCACAGAAGCTGCTTTTGGCCTAGTGTGTGCCACTTGTGAACAGATTGCTGATTCACAGCATCG
GTCCCACAGACAAATGGCTACTACTACCAATCCATTAATCAGGCATGAAAACAGAATGGTTCTGGCTAGCAC
TACGGCAAAGGCGATGGAACAGATGGCTGGATCGAGTGAACAGGCAGCAGAGGCCATGGAGGTTGCTAATCA
GACCAGGCAGATGGTGCATGCAATGAGAACTATTGGAACCCATCCTAGTTCCAGTGCTGGTCTGAAAGATGA
CCTCCTTGAAAATTTGCAGGCCTACCAGAAGCGAATGGGAGTGCAGATGCATCGATTCAAGTGATCCTCTCG
TCATTGCAGCAAATATCATTGGGATCTTGCACCTGATATTGTGGATTACTGATCGTCTTTTTTTCAAATGCA
TTTATCGTCGCTTTAAATACGGTTTGAAAAGAGGGCCTTCTACGGAAGGAGTGCCTGAGTCCATGAGGGAAG
AATATCAACAGGAACAGCAGAGTGCTGTGGATGTTGACGATGGTCATTTTGTCAACATAGAGCTAGAGTAA-
-------------------
>A/swine/Kansas/A01378041/2018/1-1001
-------------------------ATGAGTCTTCTAACCGAGGTCGAAACGTACGTTCTTTCTATCATCCC
GTCAGGCCCCCTCAAAGCCGAGATCGCGCAGAGACTGGAAAGTGTATTTGCAGGAAAGAACACAGATCTTGA
GGCTCTCATGGAATGGCTAAAGACAAGACCAATCTTGTCACCTCTGACTAAGGGAATTTTAGGATTTGTGTT
CACGCTCACCGTGCCCAGTGAGCGAGGACTGCAGCGTAGACGCTTTGTCCAAAATGCCCTAAATGGGAATGG
GGACCCGAACAACATGGATAGAGCAGTTAAACTATACAAGAAGCTCAAAAGAGAAATAACGTTCCATGGGGC
CAAGGAGGTGTCACTAAGCTATTCAACTGGTGCACTTGCCAGTTGCATGGGCCTCATATACAACAGGATGGG
AACAGTGACCACAGAAGCTGCTTTTGGTCTAGTGTGTGCCACCTGTGAACAGATTGCTGATTCACAGCATCG
ATCTCACAGACAAATGGTTACTACCACCAATCCACTAATCAGGCATGAAAACAGAATGGTGCTGGCTAGCAC
TACTGCAAAGGCTATGGAACAGATGGCTGGATCGAGTGAACAGGCAGCAGAGGCCATGGAGGTTGCTAATCA
GACTAGGCAGATGGTACATGCAATGAGAACTATTGGGACTCATCCTAGCTCCAGTGCTGGTCTGAAGGATGA
CCTTCTTGAAAATTTACAGGCCTACCAGAAGCGAATGGGAGTGCAAATGCAGCGATTCAAGTGATCCTCTCG
TCATTGCAGCAAATATCATTGGGATCTTGCACCTGATATTGTGGATTACTGATCGTCTTTTTTTCAAATGTA
TTTATCGTCGCTTTAAATACGGTTTGAAAAGAGGGCCTCCTACGGAAGGAGTGCCTGAGTCCATGAGGGAAG
AATATCAACAGGAACAGCAGAGTGCTGTGGATGTTGACGATGGTCATTTTGTCAACATAGAGCTAGAGTAAA
AAACTACCTTGTTTCTAC-
>A/swine/Iowa/A02157004/2018/1-982
-------------------------ATGAGTCTTCTAACCGAGGTCGAAACGTACGTTCTTTCTATCATACC
GTCAGGCCCCCTCAAAGCCGAGATCGCGCAGAGACTGGAAAGTGTCTTTGCAGGAAAGAACACGGATCTTGA
GGTTCTCATGGAATGGCTAAAGACAAGACCAATCTTGTCACCTCTGACTAAGGGAATTTTAGGATTTGTGTT
CACGCTCACCGTGCCCAGTGAGCGAGGACTGCAGCGTAGACGTTTTGTCCAAAATGCCCTGAATGGGAATGG
GGACCCAAACAACATGGATAGAGCAGTTAAACTATACAAGAAGCTCAAAAGAGAAATAACGTTCCATGGGGC
CAAGGAGGTGTCACTAAGCTATTCAACTGGTGCACTTGCCAGTTGCATGGGCCTCATATACAACAGGATGGG
AACAGTGACCACAGAAGCTGCTTTTGGTCTAGTGTGCGCCACTTGTGAACAGATTGCTGATTCACAGCATCG
GTCTCACAGACAAATGGCTACAACCACCAATCCACTAATTAGGCATGAGAACAGAATGGTTCTGGCTAGCAC
TACGGCAAAGGCTATGGAACAGATGGCTGGGTCGAGTGAACAGGCAGCGGAGGCCATGGAGGTTGCTAATCA
GACTAGGCAGATGGTACATGCAATGAGAACTATTGGAACTCATCCTAGCTCCAGTACTGGTCTGAAGGATGA
CCTTCTTGAAAATTTGCAGGCCTACCAGAAGCGAATGGGAGTGCAGATGCAGCGATTCAAGTGATCCTCTCG
CCATTGCAGCAAATATCATTGGGATCTTGCACCTGACATTGTGGATTACTGATCGTCTTTTTTTCAAATGTA
TTTATCGTCGCTTTAAATACGGTTTGAAAAGAGGGCCTTCTACGGAAGGGGTGCCTGAATCCATGAGGGAAG
AATATCAACAGGAACAGCAGAGTGCTGTGGATGTTGACGATGGTCATTTTGTCAACATAGAGCTAGAGTAA-
-------------------
>A/swine/North_Carolina/A02156991/2018/1-982
-------------------------ATGAGTCTTCTGACCGAGGTCGAAACGTACGTTCTTTCTATCATCCC
GTCAGGCCCCCTCAAAGCCGAGATCGCGCAGAGACTGGAAAGTGTCTTTGCAGGAAAGAACACAGATCTTGA
GGCTCTCATGGAATGGCTAAAGACAAGACCAATCTTGTCACCTCTGACTAAGGGGATTTTAGGATTTGTGTT
CACGCTCACCGTGCCCAGTGAGCGAGGACTGCAGCGTAGACGCTTTGTTCAAAATGCCCTAAATGGGAATGG
GGACCCGAACAACATGGATAGAGCAGTTAAACTATACAAGAAGCTCAAAAGAGAAATAACGTTCCATGGGGC
TAAGGAGGTGTCATTAAGCTATTCAACTGGTGCGCTTGCCAGTTGCATGGGCCTCATATACAACAGGATGGG
AACAGTAACTACAGAAGCTGCTTTTGGTCTAGTGTGTGCCACTTGTGAACAGATTGCTGATTCACAGCATCG
GTCTCACAGACAAATGGCTACTACCACCAATCCACTAATCAGACATGAAAACAGAATGGTGCTGGCTAGCAC
TACGGCAAAGGCTATGGAACAGATGGCTGGATCGAGTGAACAGGCAGCAGAGGCCATTGAGGTTGCTAATCA
GACTAGGCAGATGGTACATGCAATGAGAACTATTGGGACTCATCCTAGCTCCAGTACTGGTCTGAAAGATGA
CCTTCTTGAAAATTTGCAGGCCTATCAGAAGAGAATGGGAGTGCAGATGCAGCGGTTCAAGTGATCCTCTTG
TCATTGCAGCAAATATCATTGGGATCTTGCACTTGATATTGTGGATTACTGATCGTCTTTTTTTCAAATGTA
TCTATCGTCGCTTTAAATACGGTTTGAAAAGAGGGCCTTCTACGGAAGGAGTGCCTGAGTCCATGAGGGAAG
AATATCAACAGGAACAGCAGAGTGCTGTGGATGTTGACGATGGTCATTTTGTCAACATAGAGCTAGAGTAA-
-------------------
>A/swine/Illinois/A02154869/2018/1-982
-------------------------ATGAGTCTTCTGACCGAGGTCGAAACGTACGTTCTTTCTATCATCCC
GTCAGGCCCCCTCAAAGCCGAGATCGCACAGAGACTGGAAAGTGTATTTGCAGGAAAGAACACAGATCTTGA
GGCCCTCATGGAATGGCTAAAGACAAGACCAATCTTGTCACCTCTGACTAAGGGGATTTTAGGATTTGTGTT
CACGCTCACCGTGCCCAGTGAGCGAGGACTGCAGCGTAGACGCTTTGTCCAAAATGCCCTAAATGGAAATGG
GGACCCGAACAATATGGATAGAGCAGTTAAGCTATACAAGAAGCTCAAAAGAGAAATAACATTCCATGGGGC
CAAGGAGGTGTCACTAAGCTATTCAACTGGTGCACTTGCCAGTTGCATGGGCCTCATATACAACAGGATGGG
AACAGTAACCACAGAAGCTGCTTTTGGTCTAGTGTGTGCCACTTGTGAACAGATTGCTGATTCACAGCATCG
GTCTCACAGACAAATGGCTACTACTACCAATCCACTGATCAGGCATGAAAACAGGATGGTGCTGGCTAGCAC
TACGGCAAAGGCTATGGAACAGATGGCTGGATCGAGTGAGCAGGCAGCAGAGGCCATGGAGGTTGCTAATAA
GACTAGGCAGATGGTACATGCAATGAGAACTATTGGGACTCATCCTAGCTCCAGTGCTGGTCTGAAAGATGA
TCTTCTTGAAAATTTGCAGGCCTACCAGAAGCGAATGGGAGTGCAAATGCAGCGATTTAAATGATCCTCTCG
TCATCGCAGCAAATATCATTGGGATCTTGCACCTGATATTGTGGATTTCTGATCGTCTTTTTTTCAAATGTG
TTTATCGTCACTTTAAATACGGTTTGAAAAGAGGGCCTTCTACAGAAGGAGTGCCTGAGTCCATGAGGGAAG
AATATCAACAGGAACAGCAGAGTTCTGTGGATGTTGACGATGGTCATTTTGTCAACATAGAGTTAGAGTAA-
-------------------
>A/swine/Pennsylvania/A02156984/2018/1-982
-------------------------ATGAGTCTTCTAACCGAGGTCGAAACGTACGTTCTTTCCATCATCCC
GTCAGGCCCCCTCAAAGCCGAGATCGCACAGAGACTGGAAAGTGTCTTTGCAGGAAAGAACACAGATCTTGA
GGCTCTCATGGAATGGCTAAAGACAAGACCAATCTTGTCACCTCTGACTAAGGGAATTTTAGGATTTGTGTT
CACGCTCACCGTGCCCAGTGAGCGAGGACTGCAGCGTAGACGCTTTATCCAAAATGCCCTAAATGGAAATGG
GGACCCGAACAACATGGATAGAGCAGTTAAACTATACAAGAAGCTCAAAAGAGAAATAACGTTCCATGGGGC
CAAGGAGGTGTCACTAAGCTATTCAACTGGTGCACTTGCAAGTTGCATGGGCCTCATATACAACAGAATGGG
AACAGTGACCACAGAAGCTGCTTTCGGTCTAGTTTGTGCCACTTGTGAACAGATTGCTGATTCACAGCATCG
GTCTCACAGACAAATGGCTACTACCACAAATCCACTAATCAGGCATGAAAACAGAATGGTGCTGGCTAGCAC
TACGGCAAAGGCTATGGAACAGGTGGCTGGATCGAGTGAACAGGCAGCGGAGGCCATGGAGGTTGCTAATAA
GACTAGGCAGATGGTACATGCAATGAGAACTATTGGGACTCATCCTAGCTCCAGTGCTGGTCTGAGAGATGA
CCTTCTTGAAAATTTGCAGGCCTACCAGAAGCGAATGGGAGTGCAGATGCAGCGGTTCAAGTGATCCTCTCG
TCATTGCAGCAAACATCATTGGGATCTTGCACCTGATATTGTGGATTACTGATCGTCTTTTTTTCAAATGCA
TTTATCGTCGCTTTAAATACGGTTTGAAAAGAGGGCCTTCTACGGAAGGAGTGCCTGAGTCCATGAGGGAAG
AATATCAACAGGAGCAGCAGAGTGCTGTGGATGTTGACGATGGTCATTTTGTCAACATAGAGCTAGAGTAA-
-------------------
>A/swine/Indiana/A02155664/2018/1-982
-------------------------ATGAGTCTTCTAACCGAGGTCGAAACGTACGTTCTTTCTATCATCCC
GTCAGGCTCCCTCAAAGCCGAGATCGCGCAGAGACTGGAAAGTGTTTTCTCAGGAAAGAGCGCAGATCTTGA
GGCTCTCATGGAATGGCTAAAGACAAGACCAATCTTGTCACCTCTGACTAAGGGGATTTTAGGATTTGTGTT
CACGCTCACCGTGCCCAGTGAGCGAGGACTGCAGCGTAGACGCTTTGTCCAAAATGCCCTAAATGGGAATGG
GGACCCGAACAACATGGATAGAGCAGTTAAACTATACAAGAAGCTCAAAAGAGAAATAACGTTCCATGGGGC
CAAGGAGGTGTCACTAAGCTATTCAACTGGTGCACTTGCCAGTTGCATGGGCCTCATATACAACAGAATGGG
AACAGTGACCACAGAAGCTGCTTTTGGTCTGGTGTGTGCCACTTGTGAACAGATTGCTGATTCACAGCATCG
GTCTCACAGACAAATGGCTACTACCACCAATCCACTAATCAGGCATGAAAACAGAATGGTGCTGGCTAGCAC
TACGGCAAAGGCTATGGAACAGATGGCTGGATCGAGTGAACAGGCAGCAGAGGCCATGGAGGTTGCTAATCA
AACTAGGCAGATGGTACATGCAATGAGAACCATTGGGACTCATCCTAGCTCCAGTGCTGGTCTGAAAGATGA
CCTTCTTGAAAATTTGCAGGCCTACCAGAAGCGAATGGGAGTGCAGATGCAGCGATTCAAATGATCCTCTCG
TCATTGCAGCAAATATCATTGGGATCTTGCACCTGATATTGTGGATTACTGATCGTCTTTTCTTCAAATGTA
TTTATCGTCGCTTTAAATACGGTTTGAAAAGAGGGCCTTCTACGGAAGGAGTGCCTAAGTCCATGAGGGAAG
AATATCAACAGGAACAGCAGAGTGCTGTGGATGTTGACGATGGTCATTTTGTCAACATAGAGCTAGAGTAA-
-------------------
>A/swine/Oklahoma/A01785573/2018/1-982
-------------------------ATGAGTCTTCTAACCGAGGTCGAAACGTACGTCCTTTCTATCATACC
GTCAGGCCCCCTCAAAGCCGAGATCGCGCAGAGACTGGAAAGTGTCTTTGCAGGAAAGAACACAGATCTTGA
GGCTCTCATGGAATGGCTAAAGACAAGACCAATCTTGTCACCTCTGACTAAGGGAATTTTAGGGTTTGTGTT
CACGCTCACCGTGCCCAGTGAGCGAGGACTGCAGCGTAGACGCTTTGTCCAAAATGCCCTAAATGGGAATGG
GGACCCAAACAACATGGATAGAGCAGTTAAACTATATAAGAAGCTCAAAAGAGAAATAACGTTCCATGGGGC
CAAGGAGGTGTCACTAAGCTATTCAACTGGTGCACTTGCCAGTTGCATGGGCCTCATATACAACAGGATGGG
AACAGTGACCACAGAGGCTGCTTTTGGTCTAGTGTGTGCCACTTGTGAACAGATTGCTGATTCACAGCATCG
GTCTCACAGACAAATGGCTACTACCACCAATCCACTAATCAGGCATGAAAACAGAATGGTTCTGGCTAGCAC
TACGGCAAAGGCTATGGAACAGATGGCTGGATCGAGTGAACGGGCAGCGGAGGCCATGGAGGTTGCTAATCA
GACTAGGCAGATGGTACATGCAATGAGAACTATTGGGACTCATCCTAGCTCCAGTACTGGTCTGAAAGATGA
CCTTCTTGAAAATTTACAGGCCTACCAGAAGCGAATGGGAGTGCAGATGCAGCGATTCAAGTGATCCTCTCG
CCATTGCAGCAAATATCATTGGGATCTTGCACCTGATATTGTGGATTACTGATCGTCTTTTTTTCAAATGTA
TTTATCGTCGCTTTAAATACGGTTTGAAAAGAGGGCCTTCTACGGAAGGGGTGCCTGAGTCCATGAGGGAAG
AATATCAACAGGAACAGCAGAGTGCTGTGGATGTTGACGATGGTCATTTTGTCAACATAGAGCTAGAGTAA-
-------------------
>A/swine/Nebraska/A01785465/2018/1-982
-------------------------ATGAGTCTTCTAACCGAGGTTGAAACGTACGTTCTTTCTATCGTCCC
GTCAGGCCCCCTCAAAGCCGAGATCGCGCAGAGACTGGAAAGTGTCTTTGCAGGAAAGAACACAGATCTTGA
GGCTCTAATGGAATGGCTAAAGACAAGACCAATCTTGTCACCTCTGACTAAGGGAATTTTAGGGTTTGTGTT
CACGCTCACCGTGCCCAGTGAGCGAGGACTGCAGCGTAGACGCTTTGTCCAAAATGCCCTAAATGGGAATGG
GGACCCGAACAACATGGATAGAGCAGTTAAACTATACAAGAAGCTCAAAAGAGAAATAACGTTCCATGGGGC
CAAGGAGGTGTCGCTAAGCTATTCAACTGGTGCACTTGCCAGTTGCATGGGCCTCATATACAACAGGATGGG
AACAGTGACCACAGAAGCTGCTTTTGGCCTAGTGTGTGCCACTTGTGAACAGATTGCTGATTCACAGCATCG
GTCCCACAGACAAATGGTTACTACTACCAATCCATTAATCAGGCATGAAAACAGAATGGTCCTGGCTAGCAC
TACGGCAAAGGCTATGGAACAGATGGCTGGATCGAGTGAACAGGCAGCAGAGGCCATGGAGGTTGCTAATCA
GACTAGGCAGATGGTACATGCAATGAGAACTATTGGTACTCATCCTAGCTCCAGTGCTGGTCTGAAAGATGA
CCTCCTTGAAAATTTGCAGGCCTACCAGAAGCGAATGGGAGTGCAGATGCAGCGATTCAAGTGATACTCTCG
CCATTGCAGCAAATATCATTGGGATCTTGCACCTGATATTGTGGATTACTGATCGTCTTTTTTTCAAATGCA
TTTATCGTCGATTTAAATACGGTTTGAAAAGAGGGCCTTCTACGGAAGGAGTGCCTGAGTCCATGAGGGAAG
AATATCAACAGGAACAGCAGAGTGCTGTGGATGTTGACGATGGTCATTTTGTCAACATAGAGCTAGAGTAA-
-------------------
>A/swine/Missouri/A02155471/2018/1-982
-------------------------ATGAGTCTTCTAACCGAGGTCGAAACGTACGTTCTTTCTATCATACC
GTCAGGCCCCCTCAAAGCCGAGATCGCGCAGAGACTGGAAAGTGTCTTTGCAGGGAAAAACACAGATCTTGA
AGCTCTCATGGAATGGCTAAAGACAAGACCAATCTTGTCACCTCTGACTAAGGGAATTTTAGGATTTGTGTT
CACGCTCACCGTGCCCAGTGAGCGAGGACTGCAGCGTAGACGCTTTGTCCAAAATGCCCTGAATGGGAATGG
GGACCCAAACAACATGGATAGAGCAGTTAAACTATACAAGAAGCTCAAAAGAGAAATAACATTCCATGGGGC
CAAGGAGGTGTCACTAAGCTATTCAACTGGTGCACTTGCCAGTTGCATGGGCCTCATATACAACAGGATGGG
AACAGTGACCACAGAAGCTGCTTTTGGTCTAGTGTGTGCCACTTGTGAACAGATTGCTGATTCACAGCATCG
GTCTCACAGACAGATGGCTACAACCACCAATCCACTAATCAGGCATGAGAACAGAATGGTGCTGGCTAGCAC
TACGGCAAAGGCTATGGAACAGATGGCTGGATCGAGTGAACAGGCAGCGGAGGCCATGGAGGTTGCTAATCA
GACTAGGCAGATGATACATGCAATGAGAACTATTGGGACTCATCCTAGCTCCAGTACTGGTCTGAAAGATGA
CCTTCTTGAAAATTTGCAGGCCTACCAGAAGCGAATGGGAGTGCAGATGCAGCGATTCAAGTGATCCTCTCG
CCATTGCAGCAAATATCATTGGGATCTTGCACCTGATATTGTGGATTGCTGATCGTCTTTTTTTCAAATGTA
TTTATCGTCGCTTTAAATACGGTTTGAAAAGAGGGCCTTCAACGGAAGGAGTGCCTGAGTCCATGAGGGAAG
AATACCAACAGGAACAGCAGAGTGCTGTGGATGTTGACGATGGTCATTTTGTCAACATAGAGCTAGAGTAA-
-------------------
>A/swine/Illinois/A02157056/2018/1-982
-------------------------ATGAGTCTTCTAACCGAGGTCGAAACGTACGTTCTGTCTATCATTCC
GTCAGGCCCCCTCAAAGCCGAGATCGCGCAGAGACTGGAAAGTGTTTTTGCAGGAAAGAACACAGATCTTGA
GGCTCTCATGGAATGGCTAAAGACAAGACCAATCTTGTCACCTCTGACTAAGGGAATTTTAGGATTTGTGTT
CACGCTCACCGTGCCCAGTGAGCGAGGACTGCAGCGTAGACGCTTTGTCCAAAATGCCCTGAATGGAAATGG
GGACCCAAACAACATGGATAGAGCAGTTAAACTATACAAGAAGCTCAAAAGAGAAATAACTTTCCATGGGGC
AAAGGAAGTGTCACTTAGCTATTCAACTGGTGCACTTGCCAGTTGCATGGGCCTCATATACAACAGAATGGG
AACAGTGACCACAGAAGCTGCTTTTGGTCTAGTGTGTGCCACTTGTGAACAGATTGCTGATTCACAGCATCG
GTCTCACAGACAGATGGCTACTACCACCAATCCACTAATCAGGCATGAGAACAGAATGGTGCTGGCTAGCAC
TACAGCAAAGGCTATGGAACAGATGGCTGGATCGAGTGAACAGGCAGCGGAGGCCATGGAGGTTGCTAATCA
GACTAGGCAGATGGTACATGCAATGAGAACTATTGGGACTCATCCTAGCTCCAGTACTGGTCTGAAAGATGA
CCTTCTTGAAAATTTGCAGGCCTACCAGAAGCGAATGGGAGTGCAGATGCAGCGATTCAAGTGATCCTCTCG
CCATTGCAGCCAATATCATTGGGATCTTGCACCTGACATTGTGGATTACTGATCGCCTTTTTTTCAAATGCA
TTTATCGTCGCCTTAAATACGGTTTGAAAAGAGGGCCTTCTACGGAAGGAGTGCCTGAGTCCATGAGGGAAG
AATATCAACAGGAGCAGCAGAGTGCTGTGGATGTTGACGATGGTCATTTTGTCAACATAGAGCTAGAGTAA-
-------------------
>A/swine/Iowa/A02154703/2018/1-982
-------------------------ATGAGTCTTCTAACCGAGGTCGAAACGTACGTTCTATCTATCATACC
GTCAGGCCCCCTCAAAGCCGAGATAGCGCAGAGACTGGAAAGTGTCTTTGCAGGAAAGAACACGGATCTTGA
AGCTCTCATGGAATGGCTAAAGACAAGACCAATCTTGTCACCTCTGACTAAGGGAATTTTAGGATTTGTGTT
CACGCTCACCGTGCCCAGTGAGCGAGGACTGCAGCGTAGACGCTTTGTCCAAAATGCCCTGAATGGGAACGG
GGACCCAAACAACATGGATAGAGCAGTTAAACTATACAAGAAGCTCAAAAGAGAAATAACATTCCATGGGGC
CAAGGAGGTGTCACTAAGCTATTCAACTGGTGCACTTGCCAGTTGCATGGGCCTCATATACAACAGGATGGG
AACAGTGACCACAGAAGCTGCTTTTGGTCTAGTGTGTGCCACTTGTGAACAGATTGCTGATTCACAGCATCG
GTCTCACAGACAGATGGCTACAACCACCAATCCACTAATCAGGCATGAGAACAGAATGGTGCTGGCTAGCAC
TACGGCAAAGGCTATGGAACAGATGGCTGGATCGAGTGAACAGGCAGCGGAGGCCATGGAGGTTGCTAATCA
GACTAGGCAGATGGTACATGCAATGAGAACTATTGGGACTCACCCTAGCTCCAGTACTGGTCTGAAAGATGA
CCTTCTTGAAAATTTGCAGGCCTACCAGAAGCGAATGGGAGTGCAGATGCAGCGATTCAAGTGATCCTCTCG
CCATTGCAGCAAATATCATTGGGATCTTGCACCTGATATTGTGGATTACTGATCGTCTTTTCTTCAAATGTA
TTTATCGTCGCTTTAAATACGGTTTGAAAAGAGGGCCTTCAACGGAAGGAGTGCCGGAGTCCATGAGGGAAG
AATATCAACAGGAACAGCAGAGTGCTGTGGATGTTGACGATGGTCATTTTGTCAACATAGAGCTAGAGTAA-
-------------------
>A/swine/North_Carolina/A02157639/2018/1-982
-------------------------ATGAGTCTTCTAACCGAGGTCGAAACGTACGTTCTTTCTATCATACC
GTCAGGCCCCCTCAAAGCCGAGATCGCGCAGAGACTGGAAAGTGTCTTTGCAGGAAAAAACACAGATCTTGA
AGCTCTCATGGAATGGCTAAAGACAAGACCAATCTTGTCACCTCTGACTAAGGGAATTTTAGGATTTGTGTT
CACGCTCACCGTGCCCAGTGAGCGAGGACTGCAGCGTAGACGCTTTGTCCAAAATGCCCTGAATGGGAATGG
GGACCCAAACAACATGGATAGAGCAGTTAAACTATACAAGAAGCTCAAAAGAGAAATAACATTCCATGGGGC
CAAGGAGGTGTCACTAAGCTATTCAACTGGTGCACTTGCCAGTTGCATGGGCCTCATATACAACAGGATGGG
AACAGTGACCACAGAAGCTGCTTTTGGTCTAGTTTGTGCCACTTGTGAACAGATTGCTGATTCACAGCATCG
GTCTCACAGACAGATGGCTACAACCACCAATCCACTAATCAGGCATGAGAATAGAATGGTGCTGGCTAGCAC
TACGGCAAAGGCTATGGAACAGATGGCTGGATCGAGTGAACAGGCAGCGGAGGCCATGGAGGTTGCTAATCA
GACTAGGCAGATGGTACATGCAATGAGAACTATTGGGACTCATCCTAGCTCCAGTACTGGTCTGAAAGATGA
CCTTCTTGAAAATTTGCAGGCCTACCAGAAGCGAATGGGAGTGCAGATGCAGCGATTCAAGTGATTCTCTCG
CCATTGCAGCAAATATCATTGGGATCTTGCACCTGATATTATGGATTGCTGATCGTCTTTTTTTCAAATGTA
TTTATCGTCGCTTTAAATACGGTTTGAAAAGAGGGCCTTCAACGGAAGGAGTGCCTGAGTCCATGAGGGAAG
AATACCAACAGGAACAGCAGAGTGCTGTGGATGTTGACGATGGTCATTTTGTCAACATAGAGCTAGAGTAA-
-------------------
>A/swine/Texas/A01785528/2018/1-982
-------------------------ATGAGTCTTCTAACCGAGGTCGAAACGTACGTTCTTTCTATCATCCC
GTCAGGCCCCCTCAAAGCCGAGATCGCGCAGAGACTGGAAAGTGTATTTGCAGGAAAGAACACAGATCTTGA
GGCTCTCATGGAATGGCTAAAGACAAGACCAATCTTGTCACCTCTGACTAAGGGAATTTTAGGATTTGTGTT
CACGCTCACCGTGCCCAGTGAGCGAGGACTGCAGCGTAGACGCTTTGTCCAAAATGCCCTAAATGGGAATGG
GGACCCGAACAACATGGATAGAGCAGTTAAATTATACAAGAAGCTCAAAAGAGAAATAACGTTCCATGGGGC
TAAAGAGGTGTCACTAAGCTATTCAACTGGTGCACTTGCCAGTTGCCTGGGCCTCATATACAACAGGATGGG
AACAGTGACCACAGAAGCTGCTTTTGGTCTAGTGTGTGCCACTTGTGAACAGATTGCTGATTCACAGCATCG
ATCTCACAGACAAATGGTTGCTACCACCAATCCACTAATCAGGCATGAAAACAGAATGGTGCTGGCTAGCAC
TACTGCAAAGGCTATGGAACAGATGGCTGGATCGAGTGAACAGGCAGCAGAGGCCATGGAGGTTGCTAATCA
GACTAGGCAGATGGTACATGCAATGAGGACTATTGGGACTCATCCTAGCTCCAGTGCTGGTCTGAAGGATGA
TCTTCTTGAAAATTTACAGGCCTACCAGAAGCGAATGGGAGTGCAAATGCAGCGATTCAAGTGATCCTCTCG
TCATTGCAGCAAATATCATTGGGATCTTGCACCTGATATTGTGGATTATTGATCGTCTTTTTTTCAAATGTG
TTTATCGTCGCTTTAAATACGGTTTGAAAAGAGGGCCTCCTACAGAAGGAGTGCCTGAGTCCATGAGGGAAG
AATATCAACAGGAACAGCAGAGTGCTGTAGATGTTGACGATGGTCATTTTGTCAACATAGAGCTAGAGTAA-
-------------------
>A/swine/Iowa/A02157712/2018/1-982
-------------------------ATGAGTCTTCTAACCGAGGTCGAAACGTACGTTCTTTCTATCATACC
GTCAGGCCCCCTCAAAGCCGAGATCGCGCAGAGACTGGAAAGTGTCTTTGCAGGAAAGAATACAGACCTTGA
GGCTCTCATGGAATGGCTAAAGACAAGACCAATCTTGTCACCTTTGACTAAGGGAATTTTGGGATTTGTGTT
CACGCTCACCGTGCCCAGTGAGCGAGGACTGCAGCGTAGACGTTTTGTCCAAAATGCCCTGAATGGGAATGG
GGACCCAAACAACATGGATAGAGCAGTAAAACTATACAAGAAACTCAAAAGAGAAATAACGTTCCATGGGGC
CAAGGAGGTGTCACTAAGCTATTCAACTGGTGCACTTGCCAGTTGCATGGGCCTCATATACAACAGGATGGG
AACAGTGACCACAGAAGCTGCTTTTGGTCTAGTGTGTGCCACTTGTGAACAGATTGCTGATTCACAGCATCG
GTCTCACAGACAGATGGCTACAACCACCAATCCACTAATCAGGCATGAGAACAGAATGGTGCTGGCTAGCAC
TACGGCAAAGGCTATGGAACAGATGGCTGGATCAAGTGAACAGGCAGCGGAGGCCATGGAGGTTGCTAATCA
GACTAGGCAGATGGTACATGCAATGAGAACTATTGGGACTCATCCTAGTTCCAGTACTGGTCTGAAAGATGA
CCTTCTTGAAAATTTGCAGGCCTATCAGAAGCGAATGGGAGTGCAGATGCAGCGGTTTAAGTGATCCTCTCG
CCATTGCAGCAAATATCATTGGGATCTTGCACCTGATATTGTGGATTACTGATCGTCTTTTTTTCAAATGTA
TTTATCGTCGCTTTAAATACGGTTTGAAAAGAGGGCCTTCTACGGAAGGAGTGCCTGAGTCCATGAGGGAAG
AATATCAACAGGAACAGCAGAGTGCTGTGGATGTTGACGATGGTCATTTTGTCAACATAGAGCTGGAGTAA-
-------------------
>A/swine/North_Carolina/A01785530/2018/1-982
-------------------------ATGAGTCTTCTAACCGAGGTCGAAACGTACGTTCTTTCTATCATCCC
GTCAGGCTCCCTCAAAGCCGAGATCGCGCAGAGACTGGAAAGTGTTTTTTCAGGAAAGAACACAGATCTTGA
GGCTCTCATGGAATGGCTAAAGACAAGACCAATCTTGTCACCTCTGACTAAGGGGATTTTAGGATTTGTGTT
CACGCTCACCGTGCCCAGCGAGCGAGGACTGCAGCGTAGACGCTTTGTCCAAAATGCCCTAAATGGGAATGG
GGACCCGAACAACATGGATAGAGCAGTTAAACTATACAAGAAGCTCAAAAGAGAAATAACGTTCCATGGGGC
CAAGGAGGTGTCACTAAGTTATTCAACTGGTGCACTTGCCAGTTGCATGGGCCTCATATACAACAGGATGGG
AACAGTGACCACAGAAGCTGCCTTTGGTCTGGTGTGTGCCACTTGTGAACAGATTGCTGATTCACAGCATCG
GTCTCACAGACAAATGGCTACTACCACCAATCCACTAATCAGACATGAAAACAGAATGGTGCTGGCTAGCAC
TACGGCAAAGGCTATGGAACAAATGGCTGGATCGAGTGAACAGGCAGCAGAGGCCATGGAGGTTGCTAATCA
AACTAGGCAGATGGTACATGCAATGAGAACTATTGGGACTCACCCTAGCTCCAGTGCTGGTCTGAAAGATGA
CCTTCTTGAAAATTTGCAGGCCTACCAGAAGCGAATGGGAGTGCAGATGCAGCGATTCAAGTGACCCTCTCG
TCATCGCAGCAAATATCATTGGGATCTTGCACCTGATATTGTGGATTACTGATCGTCTTTTTTTCAAATGTA
TTTATCGTCGCTTTAAATACGGTTTGAAAAGAGGGCCTTCAACGGAAGGAGTGCCTGAGTCCATGAGGGAAG
AATATCAACAGGAACAGCAGAGTGCTGTGGATGTTGACGATGGTCATTTTGTCAACATAGAGCTAGAGTAA-
-------------------
>A/swine/Indiana/A02157541/2018/1-982
-------------------------ATGAGTCTTCTAACCGAGGTCGAAACGTACGTTCTTTCTATCATACC
GTCAGGCCCCCTCAAAGCCGAGATTGCGCAGAGACTGGAAAGTGTCTTTGCAGGAAAGAATACAGACCTTGA
GGCTCTCATGGAATGGCTAAAGACAAGACCAATCTTGTCACCTTTGACTAAGGGAATTTTAGGATTTGTGTT
CACGCTCACCGTGCCCAGTGAGCGAGGACTGCAGCGTAGACGCTTTGTCCAAAATGCCCTGAATGGGAATGG
GGACCCAAACAACATGGATAGAGCAGTTAAACTATACAAGAAACTCAAAAGAGAAATAACGTTCCATGGGGC
CAAGGAGGTGTCACTAAGCTATTCAACTGGTGCACTTGCCAGTTGCATGGGCCTCATATACAACAGGATGGG
AACAGTGACCACAGAAGCTGCTTTTGGTCTAGTGTGTGCCACTTGTGAACAGATTGCTGATTCACAGCATCG
GTCTCACAGACAGATGGCTACAACCACCAATCCATTAATCAGGCATGAGAACAGAATGGTGCTGGCTAGCAC
TACGGCAAAGGCTATGGAACAGATGGCTGGATCGAGTGAACAGGCAGCGGAGGCCATGGAGGTTGCTAATCA
GACTAGGCAGATGGTACATGCAATGAGAACTATTGGGACTCATCCCAGTTCCAGTACTGGTCTGAAAGATGA
CCTTCTTGAAAATTTGCAGGCCTATCAGAAGCGAATGGGAGTGCAGATGCAGCGGTTTAAGTGATCCTCTCG
CCAATGCAGCAAATATCATTGGGATCTTGCACCTGATATTGTGGATTACTGATCGTCTTTTTTTCAAATGTA
TTTATCGTCGCTTTAAATACGGTTTGAAAAGAGGGCCTTCTACGGAAGGAGTGCCTGAGTCCATGAGGGAAG
AGTATCAACAGGAACAGCAGAGTGCTGTGGATGTTGACGATAGTCATTTTGTCAACATAGAGCTGGAGTAA-
-------------------
>A/swine/Iowa/A02154766/2018/1-982
-------------------------ATGAGTCTTCTAACAGAGGTCGAAACGTACGTTCTTTCTATCATTCC
GTCAGGCCCCCTCAAAGCCGAGATCGCGCAGAGACTGGAAAGTGTTTTTTCAGGGAAGAACGCAGATCTTGA
TGCTCTCATGGAATGGCTAAAGACAAGACCAATCTTGTCACCTCTGACTAAGGGGATTTTAGGATTTGTGTT
CACGCTCACCGTGCCCAGTGAGCGAGGACTGCAGCGTAGACGCTTTGTCCAAAATGCCCTAAATGGGAATGG
GGACCCGAACAACATGGATAGAGCAGTTAAACTATACAAGAAGCTCAAAAGAGAAATAACGTTCCATGGGGC
CAAGGAGGTGTCACTAAGCTATTCAACTGGTGCACTTGCCAGTTGCATGGGCCTCATATACAACAGAATGGG
AGCAGTGACCACAGAAGCTGCTTTTGGTCTAGTGTGTGCCACTTGCGAACAGATTGCTGATTCACAGCATCG
GTCTCACAGACAAATGGCTACTACCACCAATCCACTAATCAGGCATGAAAACAGAATGGTGCTGGCTAGCAC
TACGGCAAAGGCTATGGAACAGATGGCTGGATCGAGTGAACAGGCAGCAGAGGCCATGGAGGTTGCCAATCA
AACTAGGCAGATGGTACATGCAATGAGAACCATTGGGACTCATCCTAGCTCCAGTGCTGGTCTGAAAGATGA
CCTTCTTGAAAATTTGCAGGCCTACCAGAAGCGAATGGGAGTGCAGATGCAGCGATTCAAATGATCCTCTCG
TCATTGCAGCAAATATCATTGGGATCTTGCACCTGATATTGTGGATTACTGATCGTCTTTTTTTCAAATGTA
TTTATCGTCGTTTTAAATACGGTTTGAAAAGAGGGCCTTCTACGGAAGGAGTGCCTGAGTCTATGAGGGAAG
AATATCAACAGGAACAGCAGAGTGCTGTGGATGTTGACGATGGTCATTTTGTCAACATAGAGCTAGAGTAA-
-------------------
>A/swine/Iowa/A02157800/2018/1-982
-------------------------ATGAGTCTTCTAACCGAGGTCGAAACGTACGTTCTTTCTATCATACC
GTCAGGCCCCCTCAAAGCCGAGATCGCGCAGAGACTGGAAAGTGTCTTTGCAGGAAAGAACACAGATCTTGA
GGCTCTCATGGAATGGCTAAAGACAAGACCAATCTTGTCACCTCTGACTAAGGGGATTTTAGGATTTGTGTT
CACGCTCACCGTGCCCAGTGAGCGAGGACTGCAGCGTAGACGCTTTGTCCAAAACGCCCTGAATGGGAATGG
GGACCCAAACAACATGGATAAAGCAGTTAAATTATACAAGAAGCTCAAAAGAGAAATAACGTTCCATGGGGC
CAAGGAGGTGTCACTAAGCTATTCAACTGGTGCACTTGCCAGTTGCATGGGCCTCATATACAACAGGATGGG
AACAGTGACCACAGAAGCTGCTTTTGGTCTAGTGTGTGCCACTTGTGAACAGATTGCTGATTCACAGCATCG
GTCTCACAGACAGATGGCTACAACCACCAATCCACTAATCAGGCATGAGAACAGAATGGTGCTGGCTAGCAC
TACGGCAAAGGCTATGGAGCAGATGGCTGGATCGAGTGAACAGGCAGCGGAGGCCATGGAGGTTGCTAATCA
GACTAGGCAGATGGTACATGCAATGAGAACTATTGGGACTCATCCTAGCTCCAGTACTGGTCTGAAAGATGA
CCTTCTTGAAAATTTGCAGGCCTACCAGAAGCGAATGGGAGTGCAGATGCAGCGATTCAAGTAATCCTCTCG
CCATTGCAGCAAATATCATTGGGATCTTGCACCTGATATTGTGGATTACTGATCGTCTTTTTTTCAAATGTA
TCTATCGTCTCTTTAAATACGGTTTGAAAAGAGGGCCTTCTACGGAAGGAGTGCCTGAGTCCATGAGGGAAG
AATATCAGCAGGAACAGCAGAGTGCTGTGGATGTTGACGATGGTCATTTTGTCAACATAGAGCTAGAGTAA-
-------------------
>A/swine/Iowa/A02157968/2018/1-982
-------------------------ATGAGTCTTCTAACCGAGGTCGAAACGTACGTTCTTTCTATCATACC
GTCAGGCCCCCTCAAAGCCGAGATCGCGCAGAGACTGGAAAGTGTCTTTGCAGGAAAGAACACGGATCTTGA
GGTTCTCATGGAATGGCTAAAGACAAGACCAATCTTGTCACCTCTGACTAAGGGAATTTTAGGATTTGTGTT
CACGCTCACCGTGCCCAGTGAGCGAGGACTGCAGCGTAGACGTTTTGTCCAAAATGCCCTGAATGGGAATGG
GGACCCAAACAACATGGATAGAGCAGTTAAACTATACAAGAAGCTCAAAAGAGAAATAACGTTCCATGGGGC
CAAGGAGGTGTCACTAAGCTATTCAACTGGTGCACTTGCCAGTTGCATGGGCCTCATATACAACAGGATGGG
AACAGTGACCACAGAAGCTGCTTTTGGTCTAGTGTGCGCCACTTGTGAACAGATTGCTGATTCACAGCATCG
GTCTCACAGACAAATGGCTACAACCACCAATCCACTAATTAGGCATGAGAACAGAATGGTTCTGGCTAGCAC
TACGGCAAAGGCTATGGAACAGATGGCTGGGTCGAGTGAACAGGCAGCGGAGGCCATGGAGGTTGCTAATCA
GACTAGGCAGATGGTACATGCAATGAGAACTATTGGAACTCATCCTAGCTCCAGTACTGGTCTGAAAGATGA
CCTTCTTGAAAATTTGCAGGCCTACCAGAAGCGAATGGGAGTGCAGATGCAGCGATTCAAGTGATCCTCTCG
CCATTGCAGCAAATATCATTGGGATCTTGCACCTGACATTGTGGATTACTGATCGTCTTTTTTTCAAATGTA
TTTATCGTCGCTTTAAATACGGTTTGAAAAGAGGGCCTTCTACGGAAGGGGTGCCTGAATCCATGAGGGAAG
AATATCAACAGGAACAGCAGAGTGCTGTGGATGTTGACGATGGTCATTTTGTCAACATAGAGCTAGAGTAA-
-------------------
>A/swine/Nebraska/A02157995/2018/1-982
-------------------------ATGAGTCTTCTAACCGAGGTCGAAACGTACGTTCTTTCTATCGTCCC
GTCAGGCCCCCTCAAAGCCGAGATCGCGCAGAGACTGGAAAGTGTCTTTGCAGGAAAGAACACAGATCTTGA
GGCTCTAATGGAATGGCTAAAGACAAGACCAATCTTGTCACCTCTGACAAAGGGAATTTTAGGGTTTGTGTT
CACGCTCACCGTGCCCAGTGAGCGAGGACTGCAGCGTAGACGCTTTGTCCAAAATGCCCTAAATGGGAACGG
GGACCCGAACAACATGGATAGAGCAGTTAAACTATACAAGAAGCTCAAAAGAGAAATAACGTTCCATGGGGC
CAAGGAGGTGTCGCTAAGCTATTCAACTGGTGCACTTGCCAGTTGCATGGGCCTCATATACAACAGGATGGG
AACAGTGACCACAGAAGCTGCTTTTGGCCTAGTGTGTGCCACTTGTGAACAGATTGCTGATTCACAGCATCG
GTCCCACAGACAAATGGTTACTACTACCAATCCATTAATCAGGCATGAAAACAGAATGGTCCTGGCTAGCAC
TACGGCAAAGGCTATGGAACAGATGGCTGGATCGAGTGAACAGGCAGCAGAGGCCATGGAGGTTGCTAATCA
GACTAGGCAGATGGTACATGCAATGAGAACTATTGGTACTCATCCTAGCTCCAGTGCTGGTCTGAAAGATGA
CCTCCTTGAAAATTTGCAGGCCTACCAGAAGCGAATGGGAGTGCAGATGCAGCGATTCAAGTGATACTCTCG
CCATTGCAGCAAATATCATTGGGATCTTGCACCTGATATTGTGGATTACTGATCGTCTTTTTTTCAAATGCA
TTTATCGTCGATTTAAATACGGTTTGAAAAGAGGGCCTTCTACGGAAGGAGTGCCTGAGTCCATGAGGGAAG
AATATCAACAGGAACAGCAGAGTGCTGTGGATGTTGACGATGGTCATTTTGTCAACATAGAGCTAGAGTAA-
-------------------
>A/swine/Missouri/A02157539/2018/1-982
-------------------------ATGAGTCTTCTAACCGAGGTCGAAACGTACGTTCTTTCTATCATCCC
GTCAGGCCCCCTCAAAGCCGAGATCGCGCAGAGACTGGAAAGTGTATTTGCAGGAAAGAACACAGATCTTGA
GGCTCTCATGGAATGGCTAAAGACAAGACCAATCTTGTCACCTCTGACTAAGGGAATTTTAGGATTTGTGTT
CACGCTCACCGTGCCCAGTGAGCGAGGACTGCAGCGTAGACGTTTTATCCAAAATGCCCTAAATGGGAATGG
GGACCCGAACAACATGGATAGAGCAGTTAAACTATACAAGAAGCTCAAAAGAGAAATAACGTTCCATGGGGC
TAAGGAGGTGTCACTAAGCTATTCAACTGGTGCACTTGCCAGTTGCATGGGCCTCATATACAACAGGATGGG
AACAGTGACCACAGAAGCTGCTTTTGGTCTAGTGTGTGCCACTTGTGAACAGATTGCTGATTCACAGCATCG
ATCTCACAGACAAATGGCCACTACCACCAATCCACTAATCAGGCATGAAAACAGAATGGTGCTGGCTAGCAC
TACTGCAAAGGCTATGGAACAGATGGCTGGATCGAGTGAACAGGCAGCAGAGGCCATGGAGGTTGCTAATCA
GACTAGGCAGATGGTACATGCAATGAGGACTATTGGGACTCATCCTAGCTCCAGTACTGGTCTGAAGGATGA
CCTTCTTGAAAATTTACAGGCCTACCAGAAGCGAATGGGAGTGCAAATGCAGCGATTCAAGTGATCCTCTCG
TCATTGCAGCAAATATCATTGGGATCTTGCACCTGATATTGTGGATTACTGATCGTCTTTTTTTCAAATGTA
TTTATCGTCGCTTTAAATACGGTTTGAAAAGAGGGCCTCCTACAGAAGGAGTGCCTGAGTCCATGAGGGAAG
AATATCAACAGGAACAGCAGAGTGCTGTAGATGTTGACGATGGTCATTTTGTCAACATAGAGCTAGAGTAA-
-------------------
>A/swine/Indiana/A02158148/2018/1-982
-------------------------ATGAGTCTTCTAACCGAGGTCGAAACGTACGTTCTTTCTATCATACC
ATCAGGCCCCCTCAAAGCCGAGATCGCGCAGAGACTGGAAAGTGTCTTTGCAGGAAAGAACACAGATCTTGA
GGCTCTAATGGAATGGCTAAAGACAAGACCAATCTTGTCACCTCTGACTAAGGGAATTTTAGGGTTTGTGTT
CACGCTCACCGTGCCCAGTGAGCGAGGACTGCAGCGTAGACGCTTTGTCCAAAATGCCCTGAATGGAAATGG
GGACCCAAACAACATGGATAGAGCAGTTAAACTATACAAGAAGCTCAAAAGAGAAATAACGTTCCATGGGGC
AAAGGAGGTTTCACTAAGCTATTCAACTGGTGCACTTGCCAGTTGCATGGGCCTCATATACAACAGGATGGG
AACAGTAACCACAGAAGCTGCTTTTGGTCTAGTGTGTGCCACTTGTGAACAGATTGCTGATTCACAGCATCG
GTCTCACAGACAGATGGCTACTACCACCAACCCACTAATCAGGCATGAAAACAGAATGGTGCTAGCTAGCAC
TACAGCAAAAGCTATGGAACAGATGGCTGGATCGAGTGAACAGGCAGCGGAGGCCATGGAGGTTGCTAATCA
GACTAGGCAGATGGTACATGCAATGAGAACTATTGGGACTCATCCTAGCTCCAGTACTGGTCTGAAAGATGA
CCTTCTTGAAAATTTGCAGGCCTACCAGAAGCGAATGGGAGTGCAGATGCAGCGATTCAAGTGATCCTCTCG
CCATTGCAGCAAATATCATTGGGATCTTGCACCTGATATTGTGGATTACTGATCGTCTTTTTTTCAAATGCA
TTTATCGTCGCTTTAGATACGGTTTGAAAAGAGGGCCTTCTACGGAAGGAGTGCCTGAGTCCATGAGGGAAG
AATATCAACAGGAACAGCAGAGTGCTGTGGATGTTGACGATGGTCATTTTGTCAACATAGAGCTAGAGTAA-
-------------------
>A/swine/South_Dakota/A01785506/2018/1-982
-------------------------ATGAGTCTTCTAACCGAGGTCGAAACGTACGTTCTTTCTATCATCCC
GTCAGGCCCCCTCAAAGCCGAGATCGCGCAGAGACTGGAAAGTGTCTTTGCAGGAAAGAACACAGATCTTGA
GGCTCTCATGGAATGGCTAAAGACAAGACCAATCTTGTCACCTCTGACTAAGGGAATTTTAGGGTTTGTGTT
CACGCTCACCGTGCCCAGTGAGCGAGGACTGCAGCGTAGACGCTTTGTCCAAAATGCCTTAAATGGGAATGG
GGACCCAAACAACATGGATAGAGCAGTTAAACTATACAAGAAGCTCAAGAGAGAGATAACGTTCCATGGGGC
TAAGGAGGTGTCACTAAGCTATTCAGCTGGTGCACTTGCCAGTTGCATGGGCCTCATATACAACAGGATGGG
AACAGTGACAACAGAAGCTGCTTTTGGTCTAATGTGTGCCACTTGTGAACAGATTGCTGATTCACAGCATCG
GTCTCACAGACAAATGGCAACTACCACCAACCCACTAATCAGGCATGAAAACAGAATGGTGCTGGCCAGCAC
TACGGCAAAGGCTATGGAACAGATGGCTGGATCGAGTGAACAGGCAGCAGAGGCCATGGAGGTTGCTAATCA
GACTAGGCAGATGGTACATGCAATGAGAACTATTGGGACTCATCCTAGCTCCAGTGCTGGTCTGAAAGATGA
CCTTCTTGAAAACTTGCAGGCCTACCAGAAGAGAATGGGAGTGCAGATGCAGCGGTTCAAGTGATCCTCTCG
TCATTGCAGCAAACATCATTGGGATCTTGCACCTGATATTGTGGATTACTGATCGTCTTTTTTTCAAATGTA
TTTATCGTCGCCTTAAATACGGTTTGAAAGGAGGGCCTTCTACGGAAGGAGTGCCTGAGTCCATGAGGGAAG
AATATCGACAGGAACAGCAGAGTGCTGTGGATGTTGACGATGGTCATTTTGTCAACATAGAGCTAGAGTAA-
-------------------
>A/swine/Texas/A01785529/2018/1-982
-------------------------ATGAGTCTTCTAACCGAGGTCGAAACGTACGTTCTTTCTATCATCCC
GTCAGGCCCCCTCAAAGCCGAGATCGCGCAGAGACTGGAAAGTGTATTTGCAGGAAAGAACACAGATCTTGA
GGCTCTCATGGAATGGCTAAAGACAAGACCAATCTTGTCACCTCTGACTAAGGGAATTTTAGGATTTGTGTT
CACGCTCACCGTGCCCAGTGAGCGAGGACTGCAGCGTAGACGCTTTGTCCAAAATGCCCTAAATGGGAATGG
GGACCCAAACAACATGGATAGAGCAGTTAAATTATACAAGAAGCTCAAAAGAGAAATAACGTTCCATGGGGC
TAAAGAGGTGTCACTAAGCTATTCAACTGGTGCACTTGCCAGTTGCCTGGGCCTCATATACAACAGGATGGG
AACAGTGACCACAGAAGCTGCTTTTGGTCTAGTGTGTGCCACTTGTGAACAGATTGCTGATTCACAGCATCG
ATCTCACAGACAAATGGTTGCTACCACCAATCCACTAATCAGGCATGAAAACAGAATGGTGCTGGCTAGCAC
TACTGCAAAGGCTATGGAACAGATGGCTGGATCGAGTGAACAGGCAGCAGAGGCCATGGAGGTTGCTAATCA
GACTAGGCAGATGGTACATGCAATGAGGACTATTGGGACTCATCCTAGCTCCAGTGCTGGTCTGAAGGATGA
CCTTCTTGAAAATTTACAGGCCTACCAGAAGCGAATGGGAGTGCAAATGCAGCGATTCAAGTGATCCTCTCG
TCATTGCAGCAAATATCATTGGGATCTTGCACCTGATATTGTGGATTATTGATCGTCTTTTTTTCAAATGTA
TTTATCGTCGCTTTAAATACGGTTTGAAAAGAGGGCCTCCTACAGAAGGAGTGCCTGAGTCCATGAGGGAAG
AATATCAACAGGAACAGCAGAGTGCTGTAGATGTTGACGATGGTCATTTTGTCAACATAGAGCTAGAGTAA-
-------------------
>A/swine/Colorado/A02157972/2018/1-982
-------------------------ATGAGTCTTCTAACCGAGGTCGAAACGTACGTTCTTTCTATCATCCC
GTCAGGCCCCCTCAAAGCCGAGATCGCGCAGAGACTGGAAAGTGTCTTTGCAGGAAAGAACACAGATCTTGA
GGCTCTAATGGAATGGCTAAAGACAAGACCAATCTTGTCACCTCTGACTAAGGGAATTTTAGGATTTGTGTT
CACGCTCACCGTGCCCAGTGAGCGAGGACTGCAGCGTAGACGCTTTGTCCAAAATGCCCTAAATGGGAATGG
GGACCCGAACAACATGGATAGAGCAGTTAAATTATACAAGAAGCTCAAAAGAGAAATAACGTTCCATGGGGC
CAAGGAGGTGTCGCTAAGCTATTCAACCGGTGCACTTGCCAGTTGTATGGGCCTCATATACAATAGGATGGG
AACAGTGACCACAGAAGCTGCTTTTGGCCTAGTGTGTGCCACTTGTGAACAGATTGCTGATTCACAGCATCG
GTCCCACAGACAAATGGCTACTACTACTAATCCATTAATCAGGCATGAAAACAGAATGGTTCTGGCTAGCAC
TACGGCAAAGGCTATGGAACAGATGGCTGGATCTAGTGAACAGGCAGCAGAGGCCATGGAGGTTGCTAATCA
GACTAGGCAGATGGTGCATGCAATGAGAACTATTGGGACTCATCCTAGCTCCAGTGCTGGTCTGAAAGATGA
CCTCCTCGAAAATTTGCAGGCCTACCAGAAGCGAATGGGAGTGCAGATGCAGCGATTCAAGTGATCCTCTCG
TCATTGCAGCAAATATCATTGGGATCTTGCACCTGATATTGTGGATTACCGATCGTCTTTTTTTCAAATGCA
TTTATCGTCGCTTTAAATACGGTTTGAAAAGAGGGCCTTCTACGGAAGGAGTGCCTGAGTCCATGAGGGAAG
AATATCAACAGGAACAGCAGAGTGCTGTGGATGTTGACGATGGTCATTTTGTCAACATAGAGCTAGAGTAA-
-------------------
>A/swine/Minnesota/A01785557/2018/1-982
-------------------------ATGAGTCTTCTAACCGAGGTCGAAACGTACGTTCTTTCTATCATCCC
GTCAGGCCCCCTCAAAGCCGAGATCGCGCAGAGACTGGAAAGTGTCTTTGCAGGAAAGAGCACAGATCTTGA
GGCTCTCATGGAATGGCTAAAGACAAGACCAATCTTGTCACCTCTGACTAAGGGAATTTTAGGATTTGTGTT
CACGCTCACCGTGCCCAGTGAGCGAGGACTGCAACGTAGACGCTTTGTCCAAAATGCTCTAAATGGGAATGG
GGACCCCAACAACATGGATAGAGCAGTTAAACTATACAAGAAGCTCAAAAGAGAAATAACATTCCATGGGGC
TAAGGAGGTGTCACTAAGCTATTCAACTGGTGCACTTGCCAGTTGCATGGGCCTCATATACAACAGGATGGG
AACAGTGACCACAGAAGCTGCTTTTGGTCTAGTGTGTGCCACCTGTGAACAGATTGCTGATTCACAGCATCG
GTCTCACAGACAAATGGCTACAACCACCAACCCACTAATCAGGCATGAAAATAGAATGGTGCTGGCTAGCAC
TACTGCAAAGGCTATGGAACAGATGGCTGGATCGAGTGAACAGGCAGCAGAGGCCATGGAGGTTGCTAATCA
GACTAGGCAGATGGTACATGCAATGAGAACTATTGGGACTCATCCTAGCTCCAGTGCTGGTCTGAAAGATGA
CCTTCTTGAAAATTTACAGGCCTATCAGAAGCGAATGGGAGTGCAAATGCAGCGATTCAAGTGATCCTCTCG
TCATTGCAGCAAATATCATTGGGATCTTGCACTTGATATTGTGGATTACTGATCGTCTTTTTTTCAAATGTA
TTTACCGTCGCTTTAAATACGGTTTGAAAAGAGGGCCTTCTACAGAAGGAGTGCCTGAGTCCATGAGGGAAG
AATATCAACAGGAACAGCAGAGTGCTGTGGATGTTGACGATGGTCATTTTGTCAACATAGAGCTAGAGTAA-
-------------------
>A/swine/Iowa/A02154763/2018/1-982
-------------------------ATGAGTCTTCTAACCGAGGTCGAAACGTACGTTCTTTCTATCATACC
GTCAGGCCCCCTCAAAGCCGAGATTGCGCAGAGACTGGAAAGTGTCTTTGCAGGAAAGAATACAGACCTTGA
GGCTCTCATGGAATGGCTAAAGACAAGACCAATCTTGTCACCTTTGACTAAGGGAATTTTAGGATTTGTGTT
CACGCTCACCGTGCCCAGTGAGCGAGGACTGCAGCGTAGACGCTTTGTCCAAAATGCCCTGAATGGGAATGG
GGACCCAAACAACATGGATAGAGCAGTTAAACTATACAAGAAGCTCAAAAGAGAAATAACGTTCCATGGGGC
CAAGGAGGTGTCACTAAGCTATTCAACTGGTGCACTTGCCAGTTGCATGGGCCTCATATACAACAGGATGGG
AACAGTGACCACAGAAGCTGCTTTTGGTCTAGTGTGTGCCACTTGTGAACAGATTGCTGATTCACAGCATCG
GTCTCACAGACAGATGGCTACAACCACCAATCCACTAATCAGGCATGAGAACAGAATGGTGCTGGCTAGCAC
TACGGCAAAGGCTATGGAACAGATGGCTGGATCAAGTGAACAGGCAGCGGAGGCCATGGAGATTGCTAATCA
AACTAGGCAGATGGTACATGCAATGAGAACTATTGGGACTCATCCTAGTTCCAGTACTGGTCTGAAAGATGA
CCTTCTTGAAAATTTGCAGGCCTATCAGAAACGAATGGGAGTGCAGATGCAGCGGTTTAAGTGATCCACTCG
CCATTGCAGCAAATATCATCGGGATCTTGCACCTGATATTGTGGATTACTGATCGTCTTTTTTTCAAATGTA
TTTATCGTCGCTTTAAATACGGTTTGAAAAGAGGGCCTTCTACGGAAGGAGTGCCTGAGTCCATGAGGGAAG
AATATCAACAGGAACAGCAGAGTGCTGTGGATGTTGACGATGGTCATTTTGTCAACATAGAGCTGGAGTAA-
-------------------
>A/swine/Oklahoma/A01785571/2018/1-982
-------------------------ATGAGTCTTCTAACCGAGGTCGAAACGTACGTCCTTTCTATCATACC
GTCAGGCCCCCTCAAAGCCGAGATCGCGCAGAGACTGGAAAGTGTCTTTGCAGGAAAGAACACAGATCTTGA
GGCTCTCATGGAATGGCTAAAGACAAGACCAATCTTGTCACCTCTGACTAAGGGGATTTTAGGGTTTGTGTT
CACGCTCACCGTGCCCAGTGAGCGAGGACTGCAGCGTAGACGCTTTGTCCAAAATGCCCTAAATGGGAATGG
GGACCCAAACAACATGGATAGAGCAGTTAAACTATATAAGAAGCTCAAAAGAGAAATAACGTTCCATGGGGC
CAAGGAGGTGTCACTAAGCTATTCAACTGGTGCACTTGCCAGTTGCATGGGCCTCATATACAACAGGATGGG
AACAGTGACCACAGAGGCTGCTTTTGGTCTAGTGTGTGCCACTTGTGAACAGATTGCTGATTCACAGCATCG
GTCTCACAGACAAATGGCTACTACCACCAATCCACTAATCAGGCATGAAAACAGAATGGTGCTGGCTAGCAC
TACGGCAAAGGCTATGGAACAGATGGCTGGATCGAGTGAACAGGCAGCGGAGGCCATGGAGGTTGCTAATCA
GACTAGGCAGATGGTACATGCAATGAGAACTATTGGGACTCATCCTAGCTCCAGTACTGGTCTGAAAGATGA
CCTTCTTGAAAATTTACAGGCCTACCAGAAGCGAATGGGAGTGCAGATGCAGCGATTCAAGTGATCCTCTCG
CCATTGCAGCAAATATCATTGGGATCTTGCACCTGATATTGTGGATTACTGATCGTCTTTTTTTCAAATGTA
TTTATCGTCGCTTTAAATACGGTTTGAAAAGAGGGCCTTCTACGGAAGGGGTGCCTGAGTCCATGAGGGAAG
AATATCAACAGGAACAGCAGAGTGCTGTGGATGTTGACGATGGTCATTTTGTCAACATAGAGCTAGAGTAA-
-------------------
>A/swine/Oklahoma/A01785514/2018/1-982
-------------------------ATGAGTCTTCTGACCGAGGTCGAAACGTACGTTCTTTCTATCATCCC
GTCAGGCCCCCTCAAAGCCGAGATCGCACAGAGACTGGAAAGTGTCTTTGCAGGAAAGAACACAGATCTTGA
GGCCCTCATGGAATGGCTAAAGACAAGACCAATCTTGTCACCTCTGACTAAGGGGATTTTAGGATTTGTGTT
CACGCTCACCGTGCCCAGTGAGCGAGGACTGCAGCGTAGACGCTTTGTCCAAAGTGCCCTAAATGGAAATGG
GGACCCGAACAACATGGATAGAGCGGTTAAGCTATACAAGAAGCTCAAAAGAGAAATAACATTCCATGGGGC
CAAGGAGGTGTCACTAAGCTATTCAACTGGTGCACTTGCCAGTTGCATGGGCCTCATATACAACAGGATGGG
AACAGTAACCACAGAAGCTGCTTTTGGTCTAGTGTGTGCCACTTGTGAACAGATTGCTGATTCACAGCATCG
GTCTCACAGACAAATGGCTACTACCACCAATCCACTGATCAGGCATGAAAACAGGATGGTGCTGGCTAGCAC
TACGGCAAAGGCTATGGAACAGATGGCTGGATCGAGTGAGCAGGCAGCAGAGGCCATGGAGGTTGCTAATAA
GACTAGGCAGATGGTACATGCAATGAGAACTATTGGGACTCATCCTAGCTCCAGTGCTGGTCTGAAAGATGA
TCTTCTTGAAAATTTGCAGGCCTACCAGAAGCGAATGGGAGTGCAAATGCAGCGATTCAAATGATCCTCTCG
TCATTGCAGCAAATATCATTGGGATCTTGCACCTGATATTGTGGATTTCTGATCGTCTTTTTTTCAAATGTG
TTTACCGTCACTTTAAATACGGTTTGAAAAGAGGGCCTTCTACAGAAGGAGTGCCTGAGTCCATGAGGGAAG
AATATCAACAGGAACAGCAGAGTTCTGTTGATGTTGACGATGGTCATTTTGTCAACATAGAGCTAGAGTAA-
-------------------
>A/swine/Indiana/A01812279/2018/1-1002
---------------ATATTTAAAGATGAGTCTTCTAACCGAGGTCGAAACGTACGTTCTTTCTATCATACC
GTCAGGCCCCCTCAAAGCCGAGATTGCGCAGAGACTGGAAAGTGTCTTTGCAGGAAAGAATACAGACCTTGA
GGCTCTCATGGAATGGCTAAAGACAAGACCAATCTTGTCACCTTTGACTAAGGGAATTTTAGGATTTGTGTT
CACGCTCACCGTGCCCAGTGAGCGAGGACTGCAGCGTAGACGCTTTGTCCAAAATGCCCTGAATGGGAATGG
GGACCCAAACAACATGGACAGAGCAGTCAAACTATACAAGAAGCTCAAAAGAGAAATAACGTTCCATGGGGC
CAAGGAGGTGTCACTAAGCTATTCAACTGGTGCACTTGCCAGTTGCATGGGCCTCATATACAACAGGATGGG
AACAGTGACCACAGAAGCTGCTTTTGGTCTAGTGTGTGCCACTTGTGAACAGATTGCTGATTCACAGCATCG
GTCTCACAGACAGATGGCTACCACCACCAATCCACTAATCAGGCATGAGAACAGAATGGTGCTGGCTAGCAC
TACGGCAAAGGCTATGGAACAGATGGCTGGATCGAGTGAACAGGCAGCGGAGGCCATGGAGGTTGCTAATCA
GACTAGGCAGATGGTGCATGCAATGAGAACTATTGGGACTCATCCTAGTTCCAGTACTGGTCTGAAAGATGA
CCTTCTTGAAAATTTGCAGGCCTATCAGAAGCGAATGGGAGTGCAGATGCAGCGGTTTAAGTGATCCTCTCG
CCATTGCAGCAAATATCATTGGGATCTTGCACCTGATATTGTGGATTACTGATCGTCTTTTTTTCAAATGTG
TTTATCGTCGCTTTAAATACGGTTTGAAAAGAGGGCCTTCTACGGAAGGAGTGCCTGAGTCCATGAGGGAAG
AATATCAACAGGAACAGCAGAGTGCTGTGGATGTTGACGATGGTCATTTTGTCAACATAGAGCTGGAGTAAA
AAACTACCT----------
>A/swine/Indiana/A01812281/2018/1-982
-------------------------ATGAGTCTTCTAACCGAGGTCGAAACGTACGTTCTTTCTATCATCCC
GTCAGGCCCCCTCAAAGCCGAGATCGCGCAGAGACTGGAAAGTGTATTTGCAGGAAAGAACACAGATCTTGA
GGCTCTCATGGAATGGCTAAAGACAAGACCAATCTTGTCACCTCTGACTAAGGGAATTTTAGGATTTGTGTT
CACGCTCACCGTGCCCAGTGAGCGAGGACTGCAGCGTAGACGCTTTGTCCAAAATGCCCTAAATGGGAATGG
GGACCCGAACAACATGGATAGAGCAGTTAAACTATACAAGAAGCTCAAAAGAGAAATAACGTTCCATGGGGC
TAAAGAGGTGTCACTAAGCTATTCAACTGGTGCACTTGCCAGTTGCCTAGGCCTCATATACAACAGGATGGG
AACAGTGACCACAGAAGCTGCTTTTGGTCTAGTGTGTGCCACTTGTGAACAGATTGCTGATTCACAGCATCG
ATCTCACAGACAAATGGTCGCTACCACCAATCCACTAATCAGGCATGAAAACAGAATGGTGCTGGCTAGCAC
TACTGCAAAGGCTATGGAACAGATGGCTGGATCGAGTGAACAGGCAGCAGAGGCCATGGAGGTTGCTAATCA
GACTAGGCAGATGGTACATGCAATGAGGACTATTGGGACTCATCCTAGCTCCAGTGCTGGTCTGAAGGATGA
CCTTCTTGAAAATTTACAGGCCTACCAGAAGCGAATGGGAGTGCAAATGCAGCGATTCAAGTGATCCTCTCG
TCATTGCAGCAAATATCATTGGGATCTTGCACCTGATATTGTGGATTACTGATCGTCTTTTTTTCAAATGTA
TTTATCGTCGCTTTAAATACGGTTTGAAAAGAGGGCCTCCTACAGAAGGAGTGCCTGAGTCCATGAGGGAAG
AATATCAACAGGAACAGCAGAGTGCTGTAGATGTTGACGATGGTCATTTTGTCAACATAGAGCTAGAGTAA-
-------------------
>A/swine/Pennsylvania/A02158361/2018/1-982
-------------------------ATGAGTCTTCTAACCGAGGTCGAAACGTACGTTCTTTCTATCATCCC
GTCAGGCCCCCTCAAAGCCGAGATCGCGCAGAGACTGGAAAGTGTTTTTTCAGGAAAGAACACAGATCTTGA
GGCTCTCATGGAATGGCTAAAGACAAGACCAATCTTGTCACCTCTGACCAAGGGGATTTTAGGATTTGTGTT
CACGCTCACCGTGCCCAGTGAGCGAGGACTGCAGCGTAGACGCTTTGTCCAAAATGCCCTAAATGGGAATGG
GGACCCGAACAACATGGATAGAGCAGTTAAACTATACAAGAAGCTCAAAAGAGAAATAACGTTCCATGGGGC
CAAGGAGGTGTCACTAAGCTATTCAACTGGTGCACTTGCCAGTTGCATGGGCCTCATATACAACAGGATGGG
AACAGTGACCACAGAAGCTGCTTTTGGTCTAGTGTGTGCCACTTGTGAACAGATTGCTGATTCACAGCATCG
GTCTCACAGACAAATGGCTACTACCACCAATCCACTAATCAGACATGAAAACAGAATGGTGCTAGCCAGCAC
TACGGCAAAGGCTATGGAACAGATGGCTGGATCGAGTGAACAGGCAGCAGAGGCCATGGAGGTTGCTAATCA
AACTAGGCAGATGGTACATGCAATGAGAACTATTGGGACTCATCCTAGCTCCAGTGCTGGTCTGAAAGATGA
CCTTCTTGAAAATTTGCAGGCTTACCAGAAGCGAATGGGAGTGCAGATGCAGCGATTCAAATGACCCTCTCG
TCATTGCAGCAAATATCATTGGGATCTTGCACCTGATATTGTGGATTATTGATCGTCTTTTTTTCAAATGTA
TTTATCGTCGCTTTAAATACGGTCTGAAAAGAGGGCCTTCTACGGAAGGAGTGCCTGAGTCCATGAGGGAAG
AATATCAACAGGAACAGCAGAGTGCTGTGGATGTTGACGATAGTCATTTTGTCAACATAGAGCTAAAGTAA-
-------------------
>A/swine/Iowa/A02169067/2018/1-982
-------------------------ATGAGTCTTCTAACCGAGGTCGAAACGTACGTTCTTTCTATCATACC
TTCAGGCCCCCTCAAAGCCGAGATCGCGCAGAGACTGGAAAGTGTCTTTGCGGGAAAGAACACAGATCTTGA
GGCTCTCATGGAATGGCTAAAGACAAGACCAATCTTGTCACCTCTGACTAAGGGAATTTTAGGATTTGTGTT
CACGCTCACCGTGCCCAGTGAGCGAGGACTGCAGCGTAGACGCTTTGTCCAAAATGCCCTAAATGGGAATGG
GGACCCAAACAACATGGATAGAGCAGTTAAACTATACAAGAAGCTCAAAAGAGAAATAACGTTCCATGGGGC
CAAGGAGGTGTCACTAAGCTATTCAACTGGTGCACTTGCCAGTTGCATGGGCCTCATATACAACAGGATGGG
AACAGTGACCACAGAAGCTGCTTTTGGTCTAGTGTGTGCCACCTGTGAACAGATTGCTGATTCACAGCATCG
GTCTCACAGACAAATGGCTACTACCACCAATCCACTAATCAGGCATGAGAACAGAATGGTGCTGGCTAGCAC
TACGGCAAAGGCTATGGAACAGATGGCTGGATCGAGTGAACAGGCAGCGGAGGCCATGGAGGTTGCTAATCA
GACTAGGCAGATGGTACATGCAATGAGAACTATTGGGACTCATCCTAGCTCCAGTACTGGTCTGAAAGATGA
CCTTCTTGAAAATTTACAGGCCTACCAGAAGCGAATGGGAGTGCAGATGCAGCGATTCAAGTGATCCTCTCG
CCATTGCAGCAAATATCATTGGGATCTTGCACCTGATATTGTGGATTACTGATCGTCTTTTTTTCAAATGTA
TTTATCGTCGCTTTAAATACGGTTTGAAAAGAGGGCCTTCTACGGAAGGGGTGCCTGAGTCCATGAGGGAAG
AATATCAACAGGAACAGCAGAGTGCTGTGGATGTTGACGATGGTCATTTTGTCAACATAGAGCTAGAGTAA-
-------------------
>A/swine/Ohio/18TOSU4522/2018/1-982
-------------------------ATGAGTCTTCTAACCGAGGTCGAAACGTACGTTCTTTCTATCATCCC
GTCAGGCTCCCTCAAAGCCGAGATCGCGCAGAGACTGGAAAGTGTTTTTTCAGGAAAGAACACGGATCTTGA
GGCTCTCATGGAATGGCTAAAGACAAGACCAATCTTGTCACCTCTGACTAAGGGGATTTTAGGATTTGTGTT
CACGCTCACCGTGCCCAGTGAGCGAGGACTGCAGCGTAGACGCTTTGTCCAAAATGCCCTAAATGGGAATGG
GGACCCGAACAACATGGATAGAGCAGTTAAACTATACAAGAAGCTCAAAAGAGAAATAACGTTCCATGGGGC
CAAGGAGGTGTCACTAAGTTATTCAACTGGTGCACTTGCCAGTTGCATGGGCCTCATATACAACCGGATGGG
AACAGTGACCACAGAAGCTGCCTTTGGTCTGGTGTGTGCCACCTGTGAACAGATTGCTGATTCACAGCATCG
GTCTCACAGACAAATGGCTACTACCACCAATCCACTAATCAGACATGAAAACAGAATGGTGCTGGCTAGCAC
TACGGCAAAGGCTATGGAACAAATGGCTGGATCGAGTGAACAGGCAGCAGAGGCCATGGAGGTTGCTAATCA
AACTAGGCAGATGGTACATGCAATGAGAACTATTGGGACTCATCCTAGCTCCAGTGCTGGTCTGAAAGATGA
CCTTCTTGAAAATTTGCAGGCCTACCAGAAGCGAATGGGAGTGCAAATGCAGCGATTCAAGTGACCCTCTCG
TCATCGCAGCAAATATCATTGGGATCTTGCACCTGATATTGTGGATTACTGATCGTCTTTTTTTCAAATGTA
TTTATCGTCGCTTTAAATACGGTTTGAAAAGAGGGCCTTCTACGGAAGGAGTGCCTGAGTCCATGAGGGAAG
AATATCAACAGGAACAGCAGAGTGCTGTGGATGTTGACGATGGTCATTTTGTCAACATAGAGCTAGAGTAA-
-------------------
>A/swine/Iowa/A02158716/2018/1-982
-------------------------ATGAGTCTTCTAACCGAGGTCGAAACGTACGTTCTTTCTATCATACC
GTCAGGCCCCCTCAAAGCCGAGATTGCGCAGAGACTGGAAAGTGTCTTTGCAGGAAAGAATACAGACCTTGA
GGCTCTCATGGAATGGCTAAAGACAAGACCAATCTTGTCACCTTTGACTAAGGGAATTTTAGGATTTGTGTT
CACGCTCACCGTGCCCAGTGAGCGAGGACTGCAGCGTAGACGCTTTGTCCAAAATGCCCTAAATGGGAATGG
GGACCCAAACAACATGGACAGAGCAGTCAAACTATACAAGAAGCTCAAAAGAGAAATAACGTTCCATGGGGC
CAAGGAGGTGTCACTAAGCTATTCAACTGGTGCACTTGCCAGTTGCATGGGCCTCATATACAACAGGATGGG
AACAGTGACCACAGAAGCTGCTTTTGGTCTAGTGTGTGCCACTTGTGAACAGATTGCTGATTCACAGCATCG
GTCTCACAGACAGATGGCTACCACCACCAATCCACTAATCAGGCATGAGAACAGAATGGTGCTGGCTAGCAC
TACGGCAAAGGCTATGGAACAGATGGCTGGATCGAGTGAACAGGCAGCGGAGGCCATGGAGGTTGCTAATCA
GACTAGGCAGATGGTGCATGCAATGAGAACTATTGGGACTCATCCTAGTTCCAGTACTGGTCTGAAAGATGA
CCTTCTTGAAAATTTGCAGGCCTATCAGAAGCGAATGGGAGTGCAGATGCAGCGGTTTAAGTGATCCTCTCG
CCATTGCAGCAAATATCATTGGGATCTTGCACCTGATATTGTGGATTACTGATCGTCTTTTTTTCAAATGTG
TTTATCGTCGCTTTAAATACGGTTTGAAAAGAGGGCCTTCTACGGAAGGAGTGCCTGAGTCCATGAGGGAAG
AATATCAACAGGAACAGCAGAGTGCTGTGGATGTTGACGATGGTCATTTTGTCAACATAGAGCTGGAGTAA-
-------------------
>A/swine/Iowa/A02254795/2018/1-982
-------------------------ATGAGTCTTCTAACCGAGGTCGAAACGTACGTTCTTTCTATCGTCCC
GTCAGGCCCCCTCAAAGCCGAAATCGCGCAGAGACTGGAAAGTGTCTTTGCAGGAAAGAACACAGATCTTGA
GGCTCTAATGGAATGGCTAAAGACAAGACCAATCTTGTCACCTCTGACTAAGGGAATTTTAGGGTTTGTGTT
CACGCTCACCGTGCCCAGTGAGCGAGGACTGCAGCGTAGACGCTTTGTCCAAAATGCCCTAAATGGAAATGG
GGACCCGAACAACATGGATAGAGCAGTTAAACTATACAAGAAGCTCAAAAGAGAAATAACGTACCATGGGGC
CAAGGAGGTGTCGCTAAGCTATTCAACTGGTGCACTTGCCAGTTGCATGGGCCTCATATACAACAGGATGGG
AACAGTGACCACAGAAGCTGCTTTTGGCCTAGTGTGTGCCACTTGTGAACAGATTGCTGATTCACAGCATCG
GTCCCACAGACAAATGGTTACTACTACCAATCCATTAATCAGGCATGAAAACAGAATGGTCCTGGCTAGCAC
TACGGCAAAGGCTATGGAACAGATGGCTGGATCGAGTGAACAGGCAGCAGAGGCCATGGAGGTTGCTAATCA
GACTAGGCAGATGGTACATGCAATGAGAACTATTGGTACTCATCCTAGCTCCAGTGCTGGTCTGAAAGATGA
CCTCCTTGAAAATTTGCAGGCCTACCAGAAGCGAATGGGAGTGCAGATGCAGCGATTCAAGTGATACTCTCG
CCATTGCAGCAAATATCATTGGGATCTTGCACCTGATATTGTGGATTACTGATCGTCTTTTTTTCAAATGCA
TTTATCGTCGATTTAAATACGGTTTGAAAAGAGGGCCTTCTACGGAAGGAGTGCCTGAGTCCATGAGGGAAG
AATATCAACAGGAACAGCAGAGTGCTGTGGATGTTGACGATGGTCATTTTGTCAACATAGAGCTAGAGTAA-
-------------------
>A/swine/Minnesota/A01785592/2018/1-982
-------------------------ATGAGTCTTCTAACCGAGGTCGAAACGTACGTTCTTTCTATCATCCC
GTCAGGCCCCCTCAAAGCCGAGATCGCGCAGAGACTGGAAAGTGTATTTGCAGGAAAGAACACAGATCTTGA
GGCTCTCATGGAATGGCTAAAGACAAGACCAATCTTGTCACCTCTGACTAAGGGAATTTTAGGATTTGTGTT
CACGCTCACCGTGCCCAGTGAGCGAGGACTGCAGCGTAGACGCTTTGTCCAAAATGCCCTAAATGGGAATGG
GGACCCGAACAACATGGATAGAGCAGTTAAACTATACAAGAAGCTCAAAAGAGAAATAACGTTCCATGGGGC
CAAGGAGGTGTCACTAAGCTATTCAACTGGTGCACTTGCCAGTTGCATGGGCCTCATATACAACAGGATGGG
AACAGTGACCACAGAAGCTGCTTTTGGTCTAGTGTGTGCCACCTGTGAACAGATTGCTGATTCACAGCATCG
ATCTCACAGACAAATGGTTACTACCACCAATCCACTAATCAGGCATGAAAACAGAATGGTGCTGGCTAGCAC
TACTGCAAAGGCTATGGAACAGATGGCTGGATCGAGTGAACAGGCAGCAGAGGCCATGGAGGTTGCTAATCA
GACTAGGCAGATGGTACATGCAATGAGAACTATTGGGACTCATCCTAGCTCCAGTGCTGGTCTGAAGGATGA
CCTTCTTGAAAATTTACAGGCCTACCAGAAGCGAATGGGAGTGCAAATGCAGCGATTCAAGTGATCCTCTCG
TCATTGCAGCAAATATCATTGGAATCTTGCACCTGATATTGTGGATTACTGATCGTCTTTTTTTCAAATGTA
TTTATCGTCGCTTTAAATACGGTTTGAAAAGAGGGCCTCCTACAGAAGGAGTGCCTGAGTCCATGAGGGAAG
AATATCAACAGGAACAGCAGAGTGCTGTGGATGTTGACGATGGTCATTTTGTCAACATAGAGCTAGAGTAA-
-------------------
>A/swine/Nebraska/A02169069/2018/1-982
-------------------------ATGAGTCTTCTAACCGAGGTCGAAACGTACGTTCTTTCTATCGTCCC
GTCAGGCCCCCTCAAAGCCGAGATCGCGCAGAGACTGGAAAGTGTCTTTGCAGGAAAGAACACAGATCTTGA
GGCTCTAATGGAATGGCTAAAGACAAGACCAATCTTGTCACCTCTGACTAAGGGAATTTTAGGGTTTGTGTT
CACGCTCACCGTGCCCAGTGAGCGAGGACTGCAGCGTAGACGCTTTGTCCAAAATGCCCTAAATGGGAACGG
GGACCCGAACAACATGGATAGAGCAGTTAAACTATACAAGAAGCTCAAAAGAGAAATAACGTTCCATGGGGC
CAAGGAGGTGTCACTAAGCTATTCAACTGGTGCACTTGCCAGTTGCATGGGCCTCATATACAACAGGATGGG
AACAGTGACCACAGAAGCTGCTTTTGGCCTAGTGTGTGCCACTTGTGAACAGATTGCTGATTCACAGCATCG
GTCCCACAGACAAATGGTTACTACAACCAATCCATTAATCAGGCATGAAAACAGAATGGTCCTGGCTAGCAC
TACGGCAAAGGCTATGGAACAGATGGCTGGATCGAGTGAACAGGCAGCAGAGGCCATGGAGGTTGCTAATCA
GACTAGGCAGATGGTACATGCAATGAGAACTATTGGTACTCATCCTAGCTCCAGTGCTGGTCTGAAAGATGA
CCTCCTTGAAAATTTGCAGGCCTACCAGAAGCGAATGGGAGTGCAGATGCAGCGATTCAAGTGATACTCTCG
CCATTGCAGCAAATATCATTGGGATCTTGCACCTGATATTGTGGATTACTGATCGTCTTTTTTTCAAATGCA
TTTATCGTCGATTTAAATACGGTTTGAAAAGAGGGCCTTCTACGGAAGGAGTGCCTGAGTCCATGAGGGAAG
AATATCAACAGGAACAGCAGAGTGCTGTGGATGTTGACGATGGTCATTTTGTCAACATAGAGCTAGAGTAA-
-------------------
>A/swine/Nebraska/A02158848/2018/1-982
-------------------------ATGAGTCTTCTAACCGAGGTCGAAACGTACGTTCTTTCAATCGTCCC
GTCAGGCCCCCTCAAAGCCGAGATCGCGCAGAGACTGGAAAGTGTCTTTGCAGGAAAGAACACAGATCTTGA
GGCTCTAATGGAATGGCTAAAGACAAGACCAATCTTGTCACCTCTGACTAAGGGAATTTTAGGGTTTGTGTT
CACGCTCACCGTGCCCAGTGAGCGAGGACTGCAGCGTAGACGCTTTGTCCAAAATGCCCTAAATGGGAATGG
GGACCCGAACAACATGGATAGAGCAGTTAAACTATACAAGAAGCTCAAAAGAGAAATAACGTTCCATGGGGC
CAAGGAGGTGTCGCTAAGCTATTCAACTGGTGCACTTGCCAGTTGCATGGGCCTCATATACAACAGGATGGG
AACAGTGACCACAGAAGCTGCTTTTGGCCTAGTGTGTGCCACTTGTGAACAGATTGCTGATTCACAGCATCG
GTCCCACAGACAAATGGTTACTACTACCAATCCATTAATCAGGCATGAAAACAGAATGGTCCTGGCTAGCAC
TACGGCAAAGGCTATGGAACAGATGGCTGGATCGAGTGAACAGGCAGCAGAGGCCATGGAGGTTGCTAATCA
GACTAGACAGATGGTACATGCAATGAGAACTATTGGTACTCATCCTAGCTCTAGTGCTGGTCTGAAAGATGA
CCTCCTTGAAAATTTGCAGGCCTACCAGAAGCGAATGGGAGTGCAGATGCAGCGATTCAAGTGATACTCTCG
CCATTGCAGCAAATATCATTGGGATCTTGCACCTGATATTGTGGATTACTGATCGTCTTTTTTTCAAATGCA
TTTATCGTCGATTTAAATACGGTTTGAAAAGAGGGCCTTCTACGGAAGGAGTGCCTGAGTCCATGAGGGAAG
AATATCAACAGGAACAGCAGAGTGCTGTGGATGTTGACGATGGTCATTTTGTCAACATAGAGCTAGAGTAA-
-------------------
>A/swine/Kansas/A01785556/2018/1-982
-------------------------ATGAGTCTTCTAACCGAGGTCGAAACGTACGTCCTTTCTATCATACC
GTCAGGCCCCCTCAAAGCCGAGATCGCGCAGAGACTGGAAAGTGTCTTTGCAGGAAAGAACACAGATCTTGA
GGCTCTCATGGAATGGCTAAAGACAAGACCAATCTTGTCACCTCTGACTAAGGGAATTTTAGGGTTTGTGTT
CACGCTCACCGTGCCCAGTGAGCGAGGACTGCAGCGTAGACGCTTTGTCCAAAATGCCCTAAATGGGAATGG
GGACCCAAACAACATGGATAGAGCAGTTAAACTATATAAGAAGCTCAAAAGAGAAATAACGTTCCATGGGGC
CAAGGAGGTGTCACTAAGCTATTCAACTGGTGCACTTGCCAGTTGCATGGGTCTCATATACAACAGGATGGG
AACAGTGACCACAGAGGCTGCTTTTGGTCTAGTGTGTGCCACTTGTGAACAGATTGCTGATTCACAGCATCG
GTCTCACAGACAAATGGCTACTACCACCAATCCGCTAATCAGGCATGAAAACAGAATGGTGCTGGCTAGCAC
TACGGCAAAGGCTATGGAACAGATGGCTGGATCGAGTGAACAGGCAGCGGAGGCCATGGAGGTTGCTAATCA
GACTAGGCAGATGGTACATGCAATGAGAACTATTGGGACTCATCCTAGCTCCAGTACTGGTCTGAAAGATGA
CCTTCTTGAAAATTTACAGGCCTACCAGAAGCGAATGGGAGTGCAGATGCAGCGATTCAAGTGATCCTCTCG
CCATTGCAGCAAATATCATTGGGATCTTGCACCTGATATTGTGGATTACTGATCGTCTTTTTTTCAAATGTA
TTTATCGTCGCTTTAAATACGGTTTGAAAAGAGGGCCTTCTACGGAAGGGGTGCCTGAGTCCATGAGGGAAG
AATATCAACAGGAACAGCAGAGTGCTGTGGATGTTGACGATGGTCATTTTGTCAACATAGAGCTAGAGTAA-
-------------------
>A/swine/Minnesota/A02158518/2018/1-982
-------------------------ATGAGTCTTCTAACCGAGGTCGAAACGTACGTTCTTTCCATCATCCC
GTCAGGCCCCCTCAAAGCCGAGATCGCGCAGAGACTGGAAAGTGTCTTTGCAGGAAAGAACACAGATCTTGA
GGCTCTCATGGAATGGCTAAAGACAAGACCAATCTTGTCACCTTTGACCAAGGGCATTTTAGGGTTTGTGTT
CACGCTCACCGTGCCCAGTGAGCGAGGACTGCAGCGTAGACGCTTTGTCCAAAATGCCCTAAATGGGAATGG
GGACCCAAACAACATGGATAGAGCAGTTAAACTATACAAGAAGCTCAAAAGAGAAATAACATTCCATGGGGC
CAAGGAGGTGTCACTAAGCTATTCAACTGGTGCACTTGCCAGTTGCATGGGCATCATATACAACAGGATGGG
AACAGTAACCACAGAAGCTGCTTTTGGTTTAGTATGTGCCACTTGTGAACAGATAGCTGACTCACAGCATCG
GTCTCACAGACAAATGGCTACTACCACCAATCCACTAATCAGACATGAAAACAGAATGGTGCTGGCTAGCAC
TACGGCAAAGGCCATGGAACAGATGGCTGGATCGAGTGAACAGGCAGCAGAGGCCATGGAGGTTGCTAATCA
GACTAGGCAGATGGTACATGCAATGAGAACTATTGGGACTCATCCTAGCTCCAGTGCTGGTCTGAAAGATGA
CCTTCTTGAAAATTTGCAGGCCTACCAGAAACGAATGGGAGTGCAGATGCAGCGATTCAAGTGATCCTCTCG
TCATCGCAGCAAATATCATTGGGATTTTGCACCTGATATTGTGGATTACAGATCGTCTTTTTTTCAAATGCA
TTTATCGTCGCTTTAAATACGGGTTGAAAAGAGGGCCTTCTACGGAAGGAGTGCCTGAGTCCATGAGGGAAG
AATATCAACAGGAACAGCAGAGTGCGGTGGATGTTGACGATGGTCATTTTGTCAACATAGAGCTAGAGTAA-
-------------------
>A/swine/Illinois/A02158521/2018/1-982
-------------------------ATGAGTCTTCTAACCGAGGTCGAAACGTACGTTCTTTCTATCATCCC
GTCAGGCCCCCTCAAAGCCGAGATCGCGCAGAGACTGGAGAGTGTCTTTGCAGGAAAGAACACAGATCTTGA
GGCTCTCATGGAATGGCTAAAGACAAGACCAATCTTGTCACCACTGACTAAGGGAATTTTAGGATTTGTGTT
CACGCTCACCGTGCCCAGTGAGCGAGGACTGCAGCGTAGACGTTTTGTCCAAAATGCCCTGAATGGGAACGG
AGACCCAAACAACATGGATAGAGCAGTCAAACTATACAAGAAGCTCAAAAGAGAAATAACGTTCCATGGGGC
CAAGGAGGTGTCACTAAGCTATTCAACTGGTGCACTTGCCAGTTGCATGGGCCTCATATATAACAGGATGGG
GACAGTAACCACAGAAGCTGCTTTTGGTCTAGTATGTGCCACTTGTGAACAGATTGCTGATTCACAGCATCG
GTCTCACAGACAAATGGCTACCACCACCAATCCACTAATCAGGCATGAAAACAGAATGGTGCTGGCTAGCAC
TACGGCAAAGGCTATGGAACAGATGGCTGGATCGAGTGAACAGGCAGCAGAGGCCATGGAGGTTGCTAATCA
GACTAGGCAGATGGTACATGCAATGAGGACTATTGGGACTCATCCTAGCTCCAGTGCTGGTCTGAAAGATGA
CCTTCTTGAAAATTTGCAGGCCTACCAGAAACGAATGGGAGTGCAGATGCAGCGATTCAAGTGATCCTCTCG
TCATTGCAGCAAATATCATTGGGATCTTGCACCTGATATTGTGGATTACAGATCGTCTTTTTTTCAAATGCA
TTTATCGTCGCTTTAAATACGGGTTGAAAAGAGGGCCTTCTACGGAAGGAGTGCCTGAGTCCATGAGGGAAG
AATATCAACAGGAACAGCAGAGTGCGGTGGATGTTGACGATGGTCATTTTGTCAACATAGAGCTGGAGTAA-
-------------------
>A/swine/Kansas/A01785532/2018/1-982
-------------------------ATGAGTCTTCTAACCGAGGTCGAAACGTACGTTCTTTCTATCATCCC
GTCAGGCCCCCTCAAAGCCGAGATCGCGCAGAGACTGGAAAGTGTCTTTGCAGGAAAGAACACAGATCTTGA
GGCTCTCATGGAATGGCTAAAGACAAGACCAATCTTGTCACCTCTTACTAAGGGAATTTTAGGATTTGTGTT
CACGCTCACCGTGCCCAGTGAGCGAGGACTGCAGCGTAGACGCTTTGTCCAAAATGCCCTAAATGGGAATGG
GGACCCGAACAACATGGATAGAGCAGTTAAACTATACAAGAAGCTCAAAAGAGAAATAACGTTCCATGGGGC
CAAGGAGGTGTCGCTAAGCTATTCAACTGGTGCACTTGCCAGTTGCATGGGCCTCATATACAACAGAATGGG
AACAGTGACCACAGAAGCTGCTTTTGGCCTAGTGTGTGCCACTTGTGAACAGATTGCTGATTCACAGCATCG
GTCCCACAGACAAATGGCTACTACTACCAATCCATTAATCAGGCATGAAAATAGAATGGTTCTGGCTAGCAC
TACGGCAAAGGCTATGGAACAGATGGCTGGATCAAGTGAACAGGCAGCAGAGGCCATGGATGTTGCTAACCA
GACTAGGCAGATGGTGAATGCAATGAGAACTATTGGGACTCATCCTAGTTCCAGTGCTGGTCTGAAAGATGA
CCTCCTTGAAAATTTGCAGGCCTACCAGAAGCGAATGGGAGTGCAGATGCAGCGATTCAAGTGATCCTCTCG
TCATTGCAGCAAATATCATTGGAATCTTGCACCTGATATTGTGGATTGCTGATCGTCTTTTTTTCAAATGCA
TTTATCGTCGCTTTAAATACGGTTTGAAAAGAGGGCCTTCTACGGAAGGAGTGCCTGAGTCCATGAGGGAAG
AATATCAACAGGAACAGCAGAGTGCTGTGGATGTTGACGATGGTCATTTTGTCAACATAGAGCTAGAGTAA-
-------------------
>A/swine/Iowa/A02158408/2018/1-982
-------------------------ATGAGTCTTCTAACCGAGGTCGAAACGTACGTTCTTTCTATCATACC
GTCAGGCCCCCTCAAAGCCGAGATCGCGCAGAGACTGGAAAGTGTCTTTGCAGGAAAGAATACAGACCTTGA
GGCTCTCATGGAATGGCTAAAGACAAGACCAATCTTGTCACCTTTGACTAAGGGAATTTTGGGATTTGTGTT
CACGCTCACCGTGCCCAGTGAGCGAGGACTGCAGCGTAGACGCTTTGTCCAAAATGCCCTGAATGGGAATGG
GGACCCAAACAACATGGATAGAGCAGTCAAACTATACAAGAAGCTCAAAAGAGAAATAACATTTCATGGGGC
TAAGGAGGTGTCACTAAGCTATTCAACTGGTGCACTTGCCAGTTGCATGGGCCTCATATACAACAGGATGGG
AACAGTGACCACAGAAGCTGCTTTTGGTCTAGTGTGTGCCACTTGTGAACAGATTGCTGATTCACAGCATCG
GTCTCACAGACAGATGGCTACAACCACCAATCCACTAATCAGGCATGAGAACAGAATGGTGCTGGCTAGCAC
TACGGCAAAGGCTATGGAACAGATGGCTGGATCGAGTGAACAGGCAGCGGAGGCCATGGAGGTTGCTAATCA
GACTAGGCAGATGGTACATGCAATGAGAACTATTGGGACTCATCCTAGTTCCAGTACTGGTCTGAAAGATGA
CCTTCTTGAAAATTTGCAGGCCTATCAGAAGCGAATGGGAGTGCAGATGCAGCGGTTTAAGTGACCCTCTCG
CCATTGCAGCAAATATCATTGGGATCTTGCACCTGATATTGTGGATTACTGATCGTCTTTTTTTCAAATGTA
TTTATCGTCGCTTTAAATACGGTTTGAAAAGAGGGCCTTCTACGGAAGGAGTGCCTGAGTCCATGAGGGAAG
AATATCAACAGGAACAGCAGAGTGCTGTGGATGTTGACGATGGTCATTTTGTCAACATAGAGCTGGAGTAA-
-------------------
>A/swine/South_Dakota/A02158349/2018/1-982
-------------------------ATGAGTCTTCTAACCGAGGTCGAAACGTACGTTCTTTCTATCATCCC
GTCAGGCCCCCTCAAAGCCGAGATCGCGCAGAGACTGGAAAGTGTATTTGCAGGAAAGAACACAGATCTTGA
GGCTCTCATGGAATGGCTAAAGACAAGACCAATCTTGTCGCCTCTGACTAAGGGAATTTTAGGATTTGTGTT
CACGCTCACCGTGCCCAGTGAGCGAGGACTGCAGCGTAGACGCTTTGTCCAAAATGCCCTAAATGGGAATGG
GGACCCGAACAACATGGATAGAGCAGTTAAACTATACAAGAAGCTCAAAAGAGAAATAACGTTCCATGGGGC
TAAGGAGGTGTCACTAAGCTATTCAACTGGTGCACTTGCCAGTTGCATGGGCCTCATATACAACAGGATGGG
AACAGTGACCACAGAAGCTGCTTTTGGTCTAGTGTGTGCCACCTGTGAACAGATTGCTGATTCACAGCATCG
ATCTCACAGACAAATGGTTACTACCACCAATCCACTAATCAGGCATGAAAACAGAATGGTGCTGGCTAGCAC
TACTGCAAAGGCTATGGAACAGATGGCTGGATCGAGTGAACAGGCAGCAGAGGCCATGGAGGTTGCTAATCA
GACTAGGCAGATGGTACATGCAATGAGAACTATTGGGACTCATCCTAGCTCCAGTGCTGGTCTGAAGGATGA
CCTTCTTGAAAATTTACAGGCCTACCAGAAGCGAATGGGAGTGCAAATGCAGCGATTCAAGTGATCCTCTCG
TCATTGCAGCGAATATCATTGGGATCTTGCACCTGATATTGTGGATTACTGATCGTCTTTTTTTCAAATGTA
TTTATCGTCGCTTTAAATACGGTTTGAAAAGAGGGCCTCCTACAGAAGGAGTGCCTGAGTCCATGAGGGAAG
AATATCAACAGGAACAGCAGAGTGCTGTGGATGTTGACGATGGTCATTTTGTCAACATAGAGCTAGAGTAA-
-------------------
>A/swine/Minnesota/A02158719/2018/1-982
-------------------------ATGAGTCTTCTAACCGAGGTCGAAACGTACGTCCTTTCTATCATACC
GTCAGGCCCCCTCAAAGCCGAGATCGCGCAGAGACTGGAAAGTGTCTTTGCAGGAAAGAACACAGATCTCGA
GGCTCTCATGGAATGGCTAAAGACAAGACCAATCTTGTCACCTCTGACTAAAGGAATTTTAGGATTTGTGTT
CACGCTCACCGTGCCCAGTGAGCGAGGACTGCAGCGTAGACGCTTTGTCCAGAATGCCCTAAATGGGAATGG
GGACCCAAACAACATGGATAGAGCAGTTAAACTATACAAGAAGCTCAAAAGAGAAATAACGTTCCATGGGGC
CAAGGAGGTGTCACTAAGCTATTCAACTGGTGCACTTGCCAGTTGCATGGGCCTCATATACAACAGGATGGG
AACAGTGACCACTGAAGCTGCTTTTGGTCTAGTGTGTGCCACTTGTGAACAGATTGCTGATTCTCAGCATCG
GTCTCACAGACAGATGGCTACTACCACCAATCCACTAATCAGGCATGAAAACAGAATGGTGCTAGCTAGCAC
TACGGCAAAGGCTATGGAACAGATGGCTGGATCAAGTGAACAGGCAGTGGAGGCCATGGAGGTTGCTAATCA
GACTAGGCAGATGGTTCATGCAATGAGAACTATTGGGACTCATCCTAGCTCTAGTACTGGTCTGAAAGATGA
CCTTCTTGAAAATTTGCAGGCCTACCAGAAGCGAATGGGAGTGCAGATGCAGCGGTTCAAGTGACCCTCTCG
CCATTGCAGCAAATATCATTGGGATCTTGCACCTGATATTGTGGATTACTGATCGTCTTTTCTTCAAATGTA
TTTATCGTCGCTTTAAACACGGTTTGAAAAGAGGGCCTTCTACGGAAGGAGTGCCTGAGTCCATGAGGGAAG
AATATCAACAGGAGCAGCAGAGTGCTGTGGATGTTGACGATGGTCATTTTGTCAACATAGAGCTAGAGTAA-
-------------------
>A/swine/Iowa/A02158721/2018/1-982
-------------------------ATGAGTCTTCTAACCGAGGTCGAAACGTACGTTCTTTCTATCATCCC
GTCAGGCCCCCTCAAAGCCGAGATCGCGCAGAGACTGGAAAGTGTATTTGCAGGAAAGAACACAGATCTTGA
GGCTCTCATGGAATGGCTAAAGACAAGACCAATCTTGTCGCCTCTGACTAAGGGAATTTTAGGATTTGTGTT
CACGCTCACCGTGCCCAGTGAGCGAGGACTGCAGCGTAGACGCTTTGTCCAAAATGCCCTAAATGGGAATGG
GGACCCGAACAACATGGATAGAGCAGTTAAACTATACAAGAAGCTCAAAAGAGAAATAACGTTCCATGGGGC
TAAGGAGGTGTCACTAAGCTATTCAACTGGTGCACTTGCCAGTTGCATGGGCCTCATATACAACAGGATGGG
AACAGTGACCACAGAAGCTGCTTTTGGTCTAGTGTGTGCCACCTGTGAACAGATTGCTGATTCACAGCATCG
ATCTCACAGACAAATGGTTACTACCACCAATCCACTAATCAGGCATGAAAACAGAATGGTGCTGGCTAGCAC
TACTGCAAAGGCTATGGAACAGATGGCTGGATCGAGTGAACAGGCAGCAGAGGCCATGGAGGTTGCTAATCA
GACTAGGCAGATGGTACATGCAATGAGAACTATTGGGACTCATCCTAGCTCCAGTGCTGGTCTGAAGGATGA
CCTTCTTGAAAATTTACAGGCCTACCAGAAGCGAATGGGAGTGCAAATGCAGCGATTCAAGTGATCCTCTCG
TCATTGCAGCAAATATCATTGGGATCTTGCACCTGATATTGTGGATTACTGATCGTCTTTTTTTCAAATGTA
TTTATCGTCGCTTTAAATACGGTTTGAAAAGAGGGCCTCCTACAGAAGGAGTGCCTGAGTCCATGAGGGAAG
AATATCAACAGGAACAGCAGAGTGCTGTGGATGTTGACGATGGTCATTTTGTCAACATAGAGCTAGAGTAA-
-------------------
>A/swine/North_Carolina/A01785552/2018/1-982
-------------------------ATGAGTCTTCTAACCGAGGTCGAAACGTACGTTCTTTCTATCATACC
GTCAGGCCCCCTCAAAGCCGAGATTGCGCAGAGACTGGAAAGTGTCTTTGCTGGAAAGAATACAGACCTTGA
GGCTCTCATGGAATGGCTAAAGACAAGACCAATCTTGTCACCTTTGACTAAGGGAATTTTAGGATTTGTGTT
CACGCTCACCGTGCCCAGTGAGCGAGGACTGCAGCGTAGACGCTTTGTCCAAAATGCCCTGAATGGGAATGG
GGACCCAAACAACATGGATAGAGCAGTTAAACTATACAAGAAGCTCAAAAGAGAAATAACATTCCATGGGGC
CAAGGAGGTGTCACTAAGCTATTCAACTGGTGCACTTGCCAGTTGCATGGGCCTCATATACAACAGGATGGG
AACAGTGACCACAGAAGCTGCTTTTGGTCTAGTGTGTGCCACTTGTGAACAGATTGCTGATTCACAGCATCG
GTCTCACAGACAGATGGCTACAACCACCAATCCACTAATCAGACATGAGAACAGAATGGTGCTGGCTAGCAC
TACGGCAAAGGCTATGGAACAGATGGCTGGATCAAGTGAACAGGCAGCGGAGGCCATGGAGATTGCTAATCA
GACTAGGCAGATGGTACATGCAATGAGAACTATTGGGACTCATCCTAGTTCCAGTACTGGTCTGAAAGATGA
CCTTCTTGAAAATTTGCAGGCCTATCAGAAACGAATGGGAGTGCAGATGCAGCGGTTTAAGTGATCCACTCG
CCATTGCAGCAAATATCATCGGGATCTTGCACCTGATATTGTGGATTACTGATCGTCTTTTTTTCAAATGTA
TTTATCGTCGCTTTAAATACGGTTTGAAAAGAGGGCCTTCTACGGAAGGAGTGCCTGAGTCCATGAGGGAAG
AATATCAACAGGAACAGCAGAGTGCTGTGGATGTTGACGATGGTCATTTTGTCAACATAGAGCTGGAGTAA-
-------------------
>A/swine/Kansas/A01785536/2018/1-982
-------------------------ATGAGTCTTCTAACCGAGGTCGAAACGTACGTTCTTTCTATCATCCC
GTCAGGCCCCCTCAAAGCCGAGATCGCGCAGAGACTGGAAAGCGTATTTGCAGGAAAGAACACAGATCTTGA
GGCTCTCATGGAATGGCTAAAGACAAGACCAATCTTGTCACCTCTGACTAAGGGAATTTTAGGATTTGTGTT
CACGCTCACCGTGCCCAGTGAGCGAGGACTGCAGCGTAGACGCTTTGTCCAAAATGCCCTAAATGGGAATGG
GGACCCAAACAACATGGATAGAGCAGTTAAATTATACAAGAAGCTCAAAAGAGAAATAACGTTCCATGGGGC
TAAAGAGGTGTCACTAAGCTATTCAACTGGTGCACTTGCCAGTTGCCTGGGCCTCATATACAACAGGATGGG
AACAGTGACCACAGAAGCTGCTTTTGGTCTAGTGTGTGCCACTTGTGAACAGATTGCTGATTCACAGCATCG
ATCTCACAGACAAATGGTTGCTACCACCAATCCACTAATCAGGCATGAAAACAGAATGGTGCTGGCTAGCAC
TACTGCAAAGGCTATGGAACAGATGGCTGGATCGAGTGAACAGGCAGCAGAGGCCATGGAGGTTGCTAATCA
GACTAGGCAGATGGTACATGCAATGAGGACTATTGGGACTCATCCTAGCTCCAGTGCTGGTCTGAAGGATGA
CCTTCTTGAAAATTTACAGGCCTACCAGAAGCGAATGGGAGTGCAAATGCAGCGATTCAAGTGATCCTCTCG
TCATTGCAGCAAATATCATTGGGATCTTGCACCTGATATTGTGGATTATTGATCGTCTTTTTTTCAAATGTA
TTTATCGTCGCTTTAAATACGGTTTGAAAAGAGGGCCTCCTACAGAAGGAGTGCCTGAGTCCATGAGGGAAG
AATATCAACAGGAACAGCAGAGTGCTGTAGATGTTGACGATGGTCATTTTGTCAACATAGAGCTAGAGTAA-
-------------------
>A/swine/Iowa/A02158714/2018/1-982
-------------------------ATGAGTCTTCTGACCGAGGTCGAAACGTACGTTCTTTCTATCATCCC
GTCAGGCCCCCTCAAAGCCGAGATCGCGCAGAGACTGGAAAATGTCTTTGCAGGAAAGAACACAGATCTTGA
GGCTCTCATGGAATGGCTAAAGACAAGACCAATCTTGTCACCTTTGACCAAGGGCATTTTGGGATTTGTGTT
CACGCTCACCGTGCCCAGTGAGCGAGGACTGCAGCGTAGACGCTTTGTCCAAAATGCCCTAAATGGGAATGG
GGACCCAAACAACATGGATAGAGCAGTTAAACTATACAAGAAGCTCAAAAGAGAAATAACGTTCCATGGGGC
CAAAGAGGTGTCACTAAGCTATTCAACTGGTGCACTTGCCTGTTGCATGGGCCTCATATACAACAGGATGGG
AACAGTAACCACAGAAGCTGCTTTTGGTTTAGTATGTGCCACTTGTGAACAGATAGCTGATTCACAGCATCG
GTCTCACAGACAAATGGCTACTACCACCAATCCACTAATCAGACATGAAAACAGAATGGTGCTGGCTAGCAC
TACGGCAAAGGCCATGGAACAGATGGCTGGATCGAGTGAACAGGCAGCAGAGGCCATGGAGGTTGCAAATCA
GACTAGGCAGATGGTACATGCAATGAGAACTATTGGGACTCATCCTAGCTCCAGTGCTGGTCTGAAAGATGA
CCTTCTTGAAAATTTGCAGGCTTACCAGAAACGAATGGGAGTGCAGATGCAGCGATTCAAGTGATCCTCTCG
TCATCGCAGCAAATATCATTGGGATCTTGCACCTGATATTGTGGATTACAGATCGTCTTTTTTTCAAATGCA
TTTATCGTCGCTTTAGATACGGGTTGAAAAGAGGGCCTTCTACGGAAGGAGTGCCTGAGTCCATGAGGGAGG
AATATCAACAGGAACAGCAGAGTGCGGTGGATGTTGACGATGGTCATTTTGTCAACATAGAGCTAGAGTAA-
-------------------
>A/swine/Missouri/A02169073/2018/1-982
-------------------------ATGAGTCTTCTAACCGAGGTCGAAACGTACGTTCTTTCTATCATCCC
GTCAGGCCCCCTCAAAGCCGAGATCGCACAGAGACTGGAAAGTGTCTTTGCAGGAAAGAACACAGATCTTGA
GGCTCTCATGGAATGGCTAAAGACAAGACCAATCTTGTCACCTCTGACTAAGGGAATTTTAGGATTTGTGTT
CACGCTCACCGTGCCCAGTGAGCGGGGACTGCAGCGTAGACGCTTTATCCAAAATGCCCTAAATGGAAATGG
GGACCCGAACAACATGGATAGAGCAGTTAAACTATACAAGAAGCTCAAAAGAGAAATAACGTTCCATGGGGC
CAAGGAGGTGTCACTAAGCTATTCAACTGGTGCACTTGCAAGTTGCATGGGCCTCATATACAACAGAATGGG
AACAGTGACCACAGAAGCTGCTTTCGGTCTAGTTTGTGCCACTTGTGAACAGATTGCTGATTCACAGCATCG
GTCTCACAGACAAATGGCTACTACCACAAATCCACTAATCAGGCATGAAAACAGAATGGTGCTGGCTAGCAC
TACGGCAAAGGCTATGGAACAGGTGGCTGGATCGAGTGAACAGGCAGCGGAGGCCATGGAGGTTGCTAATAA
GACTAGGCAGATGGTACATGCAATGAGAACTATTGGGACTCATCCTAGCTCCAGTGCTGGTCTGAGAGATGA
CCTTCTTGAAAATTTGCAGGCCTACCAGAAGCGAATGGGAGTGCAGATGCAGCGGTTCAAGTGATCCTATCG
TCATTGCAGCAAACATCATTGGGATCTTGCACCTGATATTGTGGATTACTGATCGTCTTTTTTTCAAATGCA
TTTATCGTCGCTTTAAATACGGTTTGAAAAGAGGGCCTTCTACGGAAGGAGTGCCTGAGTCCATGAGGGAAG
AATATCAACAGGAGCAGCAGAGTGCTGTGGATGTTGACGATGGTCATTTTGTCAACATAGAGCTAGAATAA-
-------------------
>A/swine/Illinois/A01785545/2018/1-982
-------------------------ATGAGTCTTCTAACCGAGGTCGAAACGTACGTTCTTTCTATCATCCC
GTCAGGCCCCCTCAAAGCCGAGATCGCACAGAGACTGGAAAGTGTCTTTGCAGGAAAGAACACAGATCTTGA
GGCTCTCATGGAATGGCTAAAGACAAGACCAATCTTGTCACCTCTGACTAAGGGAATTTTAGGATTTGTGTT
CACGCTCACCGTGCCCAGTGAGCGAGGACTGCAGCGTAGACGCTTTATCCAAAATGCCCTAAATGGAAATGG
GGACCCGAACAACATGGATAGAGCAGTTAAACTATACAAGAAGCTCAAAAGAGAAATAACATTCCATGGGGC
CAAGGAGGTGTCACTAAGCTATTCAACTGGTGCACTTGCAAGTTGCATGGGCCTCATATACAACAGAATGGG
AACAGTGACCACAGAAGCTGCTTTCGGTCTAGTTTGTGCCACTTGTGAACAGATTGCTGATTCACAGCATCG
GTCTCACAGACAAATGGCTACTACCACAAATCCACTAATCAGGCATGAAAACAGAATGGTGCTGGCTAGCAC
TACGGCAAAGGCTATGGAACAGGTGGCTGGATCGAGTGAACAGGCAGCGGAGGCCATGGAGGTTGCTAATAA
GACTAGGCAGATGGTACATGCAATGAGAACTATTGGGACTCATCCTAGCTCCAGTGCTGGTCTGAGAGATGA
CCTTCTTGAAAATTTGCAGGCATACCAGAAGCGAATGGGAGTGCAGATGCAGCGGTTCAAGTGATCCTCTCG
TCATTGCAGCAAACATCATTGGGATCTTGCACCTGATATTGTGGATTACTGATCGTCTTTTTTTCAAATGCA
TTTATCGTCGCTTTAAATACGGTTTGAAAAGAGGGCCTTCTACGGAAGGAGTGCCTGAGTCCATGAGGGAAG
AATATCAACAGGAGCAGCAGAGTGCTGTGGATGTTGACGATGGTCATTTTGTCAACATAGAGCTAGAGTAA-
-------------------
>A/swine/Ohio/17TOSU4107/2017/1-1003
-----------GTAGATATTTAAAGATGAGTCTTCTAACCGAGGTCGAAACGTACGTTCTTTCTATCATACC
GTCAGGCCCCCTCAAAGCCGAGATTGCGCAGAGACTGGAAAGTGTCTTTGCAGGAAAGAATACAGACCTTGA
GGCTCTCATGGAATGGCTAAAGACAAGACCAATCTTGTCACCTTTGACTAAGGGAATTTTAGGATTTGTGTT
CACGCTCACCGTGCCCAGTGAGCGAGGACTGCAGCGTAGACGTTTTGTCCAAAATGCCCTGAATGGGAATGG
GGACCCAAACAACATGGATAGAGCAGTTAAACTATACAAGAAGCTCAAAAGAGAAATAACGTTCCATGGGGC
CAAGGAGGTGTCACTAAGCTATTCAACTGGTGCACTTGCCAGTTGCATGGGCCTCATATACAACAGGATGGG
GACAGTGACCACAGAAGCTGCTTTTGGTCTAGTGTGTGCCACTTGTGAACAGATTGCTGATTCACAGCATCG
GTCTCACAGACAGATGGCTACAACCACCAATCCACTAATCAGGCATGAGAACAGAATGGTGCTGGCTAGCAC
TACGGCAAAGGCTATGGAACAGATGGCTGGATCAAGTGAACAGGCAGCGGAGGCCATGGAGATTGCTAATCA
GACTAGGCAGATGGTACATGCAATGAGAACTATTGGGACTCATCCTAGTTCCAGTACTGGTCTGAAAGATGA
CCTTCTTGAAAATTTGCAGGCCTATCAGAAACGAATGGGAGTGCAGATGCAGCGGTTTAAGTGATCCACTCG
CCATTGCAGCAAATATCATCGGGATCTTGCACCTGATATTGTGGATTACTGATCGTCTTTTTTTCAAATGTA
TTTATCGTCGCTTTAAATACGGTTTGAAAAGAGGGCCTTCTACGGAAGGAGTGCCTGAGTCCATGAGGGAAG
AATATCAACAGGAACAGCAGAGTGCTGTGGATGTTGACGATGGTCATTTTGTCAACATAGAGCTGGAGTAAA
AAACTA-------------
>A/swine/Indiana/17TOSU1056/2017/1-1003
-----------GTAGATATTTAAAGATGAGTCTTCTAACCGAGGTCGAAACGTATGTTCTTTCTATCATCCC
GTCAGGCCCCCTCAAAGCCGAGATCGCGCAGAGACTGGAAAGTGTATTTGCAGGAAAGAACACAGATCTTGA
GGCTCTCATGGAATGGCTAAAGACAAGACCAATCTTGTCACCTCTGACTAAGGGAATTTTAGGATTTGTGTT
CACGCTCACCGTGCCCAGTGAGCGAGGACTGCAGCGTAGACGCTTTGTCCAAAATGCCCTAAATGGGAATGG
GGACCCGAACAACATGGATAGAGCAGTTAAACTATACAAGAAGCTCAAAAGGGAAATAACGTTCCATGGGGC
TAAGGAGGTGTCACTAAGCTATTCAACTGGTGCACTTGCCAGTTGCATGGGCCTCATATACAACAGGATGGG
GACAGTGACCACAGAAGCTGCTTTTGGTCTAGTGTGTGCCACTTGTGAACAGATCGCTGATTCACAGCATCG
ATCCCACAGACAAATGGCTACTACCACCAATCCACTAATCAGGCATGAAAACAGAATGGTGCTGGCTAGCAC
TACTGCAAAGGCTATGGAACAGATGGCTGGATCGAGTGAACAGGCAGCAGAGGCCATGGAGGTTGCTAATCA
GACTAGGCAGATGGTACATGCAATGAGAACTATTGGGACTCATCCTAGTTCCAGTGCTGGTCTGAAGGATGA
CCTTCTTGAAAATTTACAGGCATACCAGAAGCGAATGGGAGTGCAAATGCAGCGATTCAAGTGATCCTCTCG
TCATTGCAGCAAATATCATTGGGATCTTGCACCTGATATTGTGGATTACTGATCGTCTTTTTTTCAAATGTA
TTTATCGTCGCTTTAAATACGGTTTGAAAAGAGGGCCTTCTACAGAAGGAGTGCCTGAGTCCATGAGGGAAG
AATATCAACAGGAACAGCAGAGTGCTGTGGATGTTGACGATGGTCATTTTGTCAACATAGAGCTGGAGTAAA
AAACTA-------------
>A/swine/Ohio/17TOSU1801/2017/1-1003
-----------GTAGATGTTTAAAGATGAGTCTTCTGACCGAGGTCGAAACGTACGTTCTTTCTATCATCCC
GTCAGGCCCCCTCAAAGCCGAGATCGCACAGAGACTGGAAAGTGTCTTTGCAGGAAAGAACACAGATCTTGA
GTCCCTCATGGAATGGCTAAAGACAAGACCAATCTTGTCACCTCTGACTAAGGGGATTTTAGGATTTGTGTT
CACGCTCACCGTGCCCAGTGAGCGAGGACTGCAGCGTAGACGCTTTGTCCAAAATGCCCTAAATGGAAATGG
GGACCCGAACAACATGGATAGAGCAGTTAAGCTATACAAGAAGCTCAAAAGAGAAATAACATTCCATGGGGC
CAAGGAGGTGTCACTAAGCTATTCAACTGGTGCACTTGCCAGTTGCATGGGCCTCATATACAACAGGATGGG
AACAGTAACCACAGAAGCTGCTTTTGGTCTAGTGTGTGCCACTTGTGAACAGATTGCTGATTCACAGCATCG
GTCTCACAGACAAATGGCTACTACCACCAATCCACTGATCAGGCATGAAAACAGGATGGTGCTGGCTAGCAC
TACGGCAAAGGCTATGGAACAGATGGCTGGATCGAGTGAGCAGGCAGCAGAGGCCATGGAGGTTGCTAATAA
GACTAGGCAGATGGTACATGCAATGAGAACTATTGGGACTCATCCTAGCTCCAGTGCTGGTCTGAAAGATGA
TCTTCTTGAAAATTTGCAGGCCTACCAGAAGCGAATGGGAGTGCAAATGCAGCGATTCAAATGATCCTCTCG
TCATTGCAGCAAATATCATTGGGATCTTGCACCTGATATTGTGGATTTCTGATCGTCTTTTTTTCAAATGTG
TTTATCGTCACTTTAAATACGGTTTGAAAAGAGGGCCTTCTACAGAAGGAGTGCCTGAGTCCATGAGGGAAG
AATATCAACAGGAACAGCAGAGTTCTGTGGATGTTGACGATGGTCATTTTGTCAACATAGAGCTAGAGTAAA
AAACTA-------------
>A/swine/Iowa/17TOSU7821/2017/1-1003
-----------GTAGATATTTAAAGATGAGTCTTCTAACCGAGGTCGAAACGTACGTTCTTTCTATCATACC
GTCAGGCCCCCTCAAAGCCGAGATTGCGCAGAGACTGGAAAGTGTCTTTGCAGGAAAGAATACAGACCTTGA
GGCTCTCATGGAATGGCTAAAGACAAGACCAATCTTGTCACCTTTGACTAAGGGAATTTTAGGATTTGTGTT
CACGCTCACCGTGCCCAGTGAGCGAGGACTGCAGCGTAGACGCTTTGTCCAAAATGCCCTGAATGGGAATGG
GGACCCAAACAACATGGATAGAGCAGTTAAACTATACAAGAAGCTCAAAAGAGAAATAACGTTCCATGGGGC
CAAGGAGGTGTCACTAAGCTATTCAACTGGTGCACTTGCCAGTTGCATGGGCCTCATATACAACAGGATGGG
AACAGTGACCACAGAAGCTGCTTTTGGTCTAGTGTGTGCCACTTGTGAACAGATTGCTGATTCACAGCATCG
GTCTCACAGACAGATGGCTACAACCACCAATCCACTAATCAGGCATGAGAACAGAATGGTGCTGGCTAGCAC
TACGGCAAAGGCTATGGAACAGATGGCTGGATCAAGTGAACAGGCAGCGGAGGCCATGGAGATTGCTAATCA
GACTAGGCAGATGGTACATGCAATGAGAACTATTGGGACTCATCCTAGTTCCAGTACTGGTCTGAAAGATGA
CCTTCTTGAAAATTTGCAGGCCTATCAGAAACGAATGGGAGTGCAGATGCAGCGGTTTAAGTGATCCACTCG
CCATTGCAGCAAATATCATCGGGATCTTGCACCTGATATTGTGGATTGCTGATCGTCTTTTTTTCAAATGTA
TTTATCGTCGCTTTAAATACGGTTTGAAAAGAGGGCCTTCTACGGAAGGAGTGCCTGAGTCCATGAGGGAAG
AATATCAACAGGAACAGCAGAGTGCTGTGGATGTTGACGATGGTCATTTTGTCAACATAGAGCTGGAGTAAA
AAACTA-------------
>A/swine/Indiana/17TOSU2828/2017/1-999
---------------ATATTTAAAGATGAGTCTTCTAACCGAGGTCGAAACGTACGTTCTTTCTATCATACC
GTCAGGCCCCCTCAAAGCCGAGATCGCGCAGAGACTGGAAAGTGTCTTTGCAGGAAAAAACACAGATCTTGA
AGCTCTCATGGAATGGCTAAAGACAAGACCAATCTTGTCACCTCTGACTAAGGGAATTTTAGGATTTGTGTT
CACGCTCACCGTGCCCAGTGAGCGAGGACTGCAGCGTAGACGCTTTGTCCAAAATGCCCTGAATGGGAATGG
GGACCCAAACAACATGGATAGAGCAGTTAAACTATACAAGAAGCTCAAAAGAGAAATAACATTCCATGGGGC
CAAGGAGGTGTCACTAAGCTATTCAACTGGTGCACTTGCCAGTTGCATGGGCCTCATATACAACAGGATGGG
AACAGTGACCACAGAAGCTGCTTTTGGTCTAGTGTGTGCCACTTGTGAACAGATTGCTGATTCACAGCATCG
GTCTCACAGACAAATGGCTACAACCACCAATCCACTAATCAGGCATGAAAACAGAATGGTGCTGGCTAGCAC
TACGGCAAAGGCTATGGAACAGATGGCTGGATCGAGTGAACAGGCAGCGGAGGCCATGGAGGTTGCTAATCA
GACTAGGCAGATGGTACATGCAATGAGAACTATTGGGACTCATCCTAGCTCCAGTACTGGTCTGAAAGATGA
CCTTCTTGAAAATTTGCAGGCCTACCAGAAGCGAATGGGAGTGCAGATGCAGCGATTCAAATGATCCTCTCG
CCATTGCAGCAAATATCATTGGGATCTTGCACCTGATATTGTGGATTGCTGATCGTCTTTTTTTCAAATGTA
TTTATCGTCGCTTTAAATACGGTTTGAAAAGAGGGCCTTCAACGGAAGGAGTGCCTGAGTCCATGAGGGAAG
AATACCAACAGGAACAGCAGAGTGCTGTGGATGTTGACGATGGTCATTTTGTCAACATAGAGCTAGAGTAAA
AAACTA-------------
>A/swine/Indiana/17TOSU1725/2017/1-982
-------------------------ATGAGTCTTCTAACCGAGGTCGAAACGTACGTTCTTTCTATCATACC
GTCAGGCCCCCTCAAAGCCGAGATTGCGCAGAGACTGGAAAGTGTCTTTGCAGGAAAGAATACAGACCTTGA
GGCTCTCATGGAATGGCTAAAGACAAGACCAATCTTGTCACCTTTGACTAAGGGAATTTTAGGATTTGTGTT
CACGCTCACCGTGCCCAGTGAGCGAGGACTGCAGCGTAGACGCTTTGTCCAAAATGCCCTGAATGGGAATGG
GGACCCAAACAACATGGATAGAGCAGTTAAACTATACAAGAAGCTCAAAAGAGAAATAACGTTCCATGGGGC
CAAGGAGGTGTCACTAAGCTATTCAACTGGTGCACTTGCCAGTTGCATGGGCCTCATATACAACAGGATGGG
AACAGTGACCACAGAAGCTGCTTTTGGTCTAGTGTGTGCCACTTGTGAACAGATTGCTGATTCACAACATCG
GTCTCACAGACAGATGGCTACAACCACCAATCCACTAATCAGGCATGAGAACAGAATGGTGCTGGCTAGCAC
TACGGCAAAGGCTATGGAACAGATGGCTGGATCAAGTGAACAGGCAGCGGAGGCCATGGAGATTGCTAATCA
GACTAGGCAGATGGTACATGCAATGAGAACTATTGGGACTCATCCTAGTTCCAGTACTGGTCTGAAAGATGA
CCTTCTTGAAAATTTGCAGGCCTATCAGAAACGAATGGGAGTGCAGATGCAGCGGTTTAAGTGATCCACTCG
CCATTGCAGCAAATATCATCGGGATCTTGCACCTGATATTGTGGATTACTGATCGTCTTTTTTTCAAATGTA
TTTATCGTCGCTTTAAATACGGTTTGAAAAGAGGGCCTTCTACGGAAGGAGTGCCTGAGTCCATGAGGGAAG
AATATCAACAGGAACAGCAGAGTGCTGTGGATGTTGACGATGGTCATTTTGTCAACATAGAGCTGGAGTAA-
-------------------
>A/swine/Ohio/17TOSU4521/2017/1-1003
-----------GTAGATATTTAAAGATGAGTCTTCTAACCGAGGTCGAAACGTACGTTCTTTCTATCATCCC
GTCAGGCCCCCTCAAAGCCGAGATCGCGCAGAGACTGGAAAGTGTATTTGCAGGAAAGAACACAGACCTTGA
GGCTCTCATGGAATGGTTAAAGACAAGACCAATCTTGTCACCTCTGACTAAGGGAATTTTAGGATTTGTGTT
CACGCTCACCGTGCCCAGTGAGCGAGGACTGCAGCGTAGACGCTTTGTCCAAAATGCCCTAAATGGGAATGG
GGACCCGAACAACATGGATAGAGCAGTTAAACTATACAAGAAGCTCAAAAGAGAAATAACGTTCCATGGGGC
TAAGGAGGTGTCACTGAGCTATTCAACTGGTGCACTTGCCAGTTGCATGGGCCTCATATACAACAGGATGGG
AACAGTGACCACAGAAGCTGCTTTTGGTCTAGTGTGTGCCACTTGTGAACAGATTGCTGATTCACAGCATCG
ATCTCACAGACAAATGGCTACTACCACCAATCCACTAATCAGGCATGAAAATAGAATGGTGCTGGCTAGCAC
TACTGCAAAGGCTATGGAACAGATGGCTGGATCGAGTGAACAGGCAGCAGAGGCCATGGAGGTTGCTAATCA
GACTAGGCAGATGGTACATGCAATGAGAACTATTGGGACTCATCCTAGCTCCAGTGCTGGTCTGAAAGATGA
CCTTCTTGAAAATTTACAGGCCTACCAGAAGCGAATGGGAGTGCAAATGCAGCGATTCAAGTGATCCTCTCG
TCATTGCAGCAAATATCATTGGGATCTTGCACCTGATATTGTGGATTATTGATCGTCTTTTTTTCAAATGTA
TTTATCGTCGCTTTAAATACGGTTTGAAAAGAGGGCCTTCTACAGAAGGAGTGCCTGAGTCCATGAGGGAAG
AATATCAACAGGAACAGCAGAGTGCTGTGGATGTTGACGATGGTCATTTTGTCAACATAGAGCTAGAGTAAA
AAACTA-------------
>A/swine/Iowa/A02016894/2018/1-982
-------------------------ATGAGTCTTCTAACCGAGGTCGAAACGTACGTTCTTTCTATCATCCC
GTCAGGCCCCCTCAAAGCCGAGATCGCGCAGAGACTGGAAAGTGTATTTGCAGGAAAGAACACAGATCTTGA
AGCTCTCATGGAATGGCTAAAGACAAGACCAATCTTGTCACCACTGACTAAGGGAATTTTAGGATTTGTGTT
CACGCTCACCGTGCCCAGTGAGCGAGGACTGCAGCGTAGACGCTTTGTCCAAAATGCCCTAAATGGGAATGG
GGACCCCAACAACATGGATAGAGCAGTTAAATTATACAAGAAGCTCAAAAGGGAAATAACGTTCCATGGGGC
TAAGGAGGTGTCACTAAGCTATTCAACTGGTGCGCTTGCCAGTTGCATGGGCCTCATATACAACAGGATGGG
AACAGTGACCACAGAAGCTGCTTTTGGTCTAGTGTGTGCCACTTGTGAACAGATTGCTGATTCACAGCATAG
ATCCCACAGACAAATGGCTACTACCACCAATCCACTAATCAGGCATGAAAACAGAATGGTGCTGGCTAGCAC
TACTGCAAAGGCTATGGAACAGATGGCTGGATCGAGTGAACAGGCAGCAGAGGCCATGGAGGTTGCTAATCA
GACTAGGCAGATGGTACATGCAATGAGAACTATTGGGACTCATCCTAGCTCCAGTACTGGTCTGAAGGATGA
CCTTCTTGAAAATTTACAGGCATACCAGAAGCGAATGGGAGTGCAAATGCAGCGATTCAAGTGATCCTCTCG
TCATTGCAGCAAATATCATTGGGATCTTGCACCTGATATTGTGGATTACTGATCGTCTTTTTTTCAAATGCA
TTTATCGTCGCTTTAAATACGGTTTGAAAAGAGGGCCTTCTACAGAAGGAGTGCCTGAGTCCATGAGGGAAG
AATATCAACAGGAACAGCAGAGTGCTGTGGATGTTGACGATGGTCATTTTGTCAACATAGAGCTAGAGTAA-
-------------------
>A/swine/Arkansas/A01678570/2018/1-982
-------------------------ATGAGTCTTCTAACCGAGGTCGAAACGTACGTTCTTTCTATCATACC
GTCAGGCCCCCTCAAAGCCGAGATCGCGCAGAGACTGGAAAGTGTCTTTGCAGGAAAGAATACAGACCTTGA
GGCTCTCATGGAATGGCTAAAGACAAGACCAATCTTGTCACCTTTGACTAAGGGAATTTTAGGATTTGTGTT
CACGCTCACCGTGCCCAGTGAGCGAGGACTGCAGCGTAGACGCTTTGTCCAAAATGCCCTGAATGGGAATGG
GGACCCAAACAACATGGATAGAGCAGTTAAACTATACAAGAAGCTCAAAAGAGAAATAACGTTCCATGGGGC
CAAGGAGGTGTCACTAAGCTATTCAACTGGTGCACTTGCCAGTTGCATGGGCCTCATATACAACAGGATGGG
AACAGTGACCACAGAAGCTGCTTTTGGTCTAGTGTGTGCCACTTGTGAACAGATTGCTGACTCACAGCATCG
GTCTCACAGACAGATGGCTACAACCACCAATCCACTAATCAGGCATGAGAACAGAATGGTGCTGGCTAGCAC
TACGGCAAAGGCTATGGAACAGATGGCTGGATCGAGTGAACAGGCAGCGGAGGCCATGGAGGTTGCCAATCA
GACTAGGCAGATGGTACATGCAATGAGAACTATTGGGACTCATCCTAGTTCCAGTACTGGTCTGAAAGATGA
CCTTCTTGAAAATTTGCAGGCCTATCAGAAACGAATGGGAGTGCAGATGCAGCGGTTTAAGTGATCCTCTCG
CCATTGCAGCAAACATCATTGGGATCTTGCACCTGATATTGTGGATTACTGATCGTCTTTTTTTCAAATGTA
TTTATCGTCGCATTAAATACGGTTTGAAAAGAGGGCCTTCTACGGAAGGAGTGCCTGAGTCCATGAGGGAAG
AATATCAACAGGAACAGCAGAGTGCTGTGGATGTTGACGATGGTCATTTTGTCAACATAGAGCTGGAGTAA-
-------------------
>A/swine/Oklahoma/A02170161/2018/1-982
-------------------------ATGAGTCTTCTAACCGAGGTCGAAACGTACGTTCTTTCTATCATCCC
ATCAGGCCCCCTCAAAGCCGAGATCGCGCAGAGACTGGAGAGTGTCTTTGCAGGAAAGAACACAGATCTTGA
GGCTCTCATGGAATGGCTAAAGACAAGACCAATCTTGTCACCTTTGACTAAGGGAATTTTAGGATTTGTGTT
CACGCTCACCGTGCCCAGTGAGCGAGGACTGCAGCGTAGACGCTTTGTCCAAAATGCCCTAAATGGAAATGG
GGACCCGAACAACATGGATAGAGCAGTCAAACTATACAAGAAGCTCAAAAGAGAAATAACGTTCCATGGGGC
CAAGGAAGTGTCACTAAGCTATTCGACTGGTGCACTTGCCAGTTGCATGGGTCTCATATATAATAGAATGGG
GACAGTGACCACAGAAGCTGCTTTTGGTCTAGTATGTGCCACTTGTGAACAGATTGCTGATTCACAGCATCG
GTCTCACAGACAAATGGCTACCACCACCAATCCACTAATCAGGCATGAAAACAGAATGGTGCTGGCTAGCAC
TACGGCAAAGGCTATGGAACAGATGGCTGGATCGAGTGAACAGGCAGCAGAGGCCATGGAGGTTGCTAATCA
GACTAGGCAGATGGTACATGCAATGAGGACTATTGGGACTCATCCTAGCTCCAGTGCTGGTCTGAAAGATGA
CCTTCTTGAAAATTTGCAGGCCTACCAGAAACGAATGGGAGTGCAGATGCAGCGATTCAAGTGATCCTATCG
CCATTGCAGCAAATATCATTGGAATCTTGCACCTGATATTGTGGATTACAGATCGTCTTTTTTTCAAATGCA
TTTATCGTCGCTTTAAATACGGGTTGAAAAGAGGGCCTTCTACGGAAGGAGTGCCTGAGTCCATGAGGGAAG
AATATCAACAGGAACAGCAGAGTGCGGTGGATGTTGACGATGGTCATTTTGTCAACATAGAGCTAGAGTAA-
-------------------
>A/swine/Minnesota/A01785608/2018/1-982
-------------------------ATGAGTCTTCTAACCGAGGTCGAAACGTACGTTCTTTCTATCATACC
GTCAGGCCCCCTCAAAGCCGAGATTGCGCAGAGACTGGAAAGTGTCTTTGCAGGAAAGAATACAGACCTTGA
GGCTCTCATGGAATGGCTAAAGACAAGACCAATCTTGTCACCTTTGACTAAGGGAATTTTAGGATTTGTGTT
CACGCTCACCGTGCCCAGTGAGCGAGGACTGCAGCGTAGACGCTTTGTCCAAAATGCCCTGAATGGGAATGG
GGACCCAAACAACATGGATAGAGCAGTTAAACTATACAAGAAGCTCAAAAGAGAAATAACGTTCCATGGGGC
CAAGGAGGTGTCACTAAGCTATTCAACTGGTGCACTTGCCAGTTGCATGGGCCTCATATACAACAGAATGGG
AACAGTGACCGCAGAAGCTGCTTTTGGTCTAGTGTGTGCCACTTGTGAACAGATTGCTGACTCACAGCATCG
GTCTCACAGACAGATGGCTACAACCACCAATCCACTAATCAGGCATGAGAACAGAATGGTGCTGGCTAGCAC
TACGGCAAAGGCTATGGAACAGATGGCTGGATCGAGTGAACAGGCAGCGGAGGCCATGGAGGTTGCCAATCA
GACTAGGCAGATGGTACATGCAATGAGAACTATTGGGACTCATCCTAGTTCCAGTACTGGTCTGAAAGATGA
CCTTCTTGAAAATTTGCAGGCCTATCAGAAACGAATGGGAGTGCAGATGCAGCGGTTCAAGTGATCCTCTCG
CCATTGCAGCAAATATCATTGGGATATTGCACCTGATATTGTGGATTACAGATCGTCTTTTTTTCAAATGTA
TTTATCGTCGCTTTAAATACGGTTTGAAAAGAGGTCCTTCTACGGAAGGAGTGCCTGAGTCCATGAGGGAAG
AATATCAACAGGAACAGCAGAGTGCTGTGGATGTTGACGATGGTCATTTTGTCAACATAGAGCTGGAGTAA-
-------------------
>A/swine/Illinois/A02170163/2018/1-982
-------------------------ATGAGTCTTCTAACCGAGGTCGAAACGTACGTTCTTTCTATCATACC
GTCAGGCCCCCTCAAAGCCGAGATTGCGCAGAGACTGGAAAGTGTCTTTGCAGGAAAGAATACAGACCTTGA
GGCTCTCATGGAATGGCTAAAGACAAGACCAATCTTGTCACCTTTGACTAAGGGAATTTTAGGATTTGTGTT
CACGCTCACCGTGCCCAGTGAGCGAGGACTGCAGCGTAGACGCTTTGTCCAAAATGCCCTGAATGGGAATGG
GGACCCAAACAACATGGATAGAGCAGTTAAACTATACAAGAAGCTCAAAAGAGAAATAACGTTCCATGGAGC
CAAGGAGGTGTCACTAAGCTATTCAACTGGTGCACTTGCCAGTTGCATGGGCCTCATATACAACAGGATGGG
AACAGTGACCACAGAAGCTGCTTTTGGTCTAGTGTGTGCCACTTGTGAACAGATTGCTGATTCACAGCATCG
GTCTCACAGACAGATGGCTACAACCACCAATCCACTAATCAGGCATGAGAACAGAATGGTGCTGGCTAGCAC
TACGGCAAAGGCTATGGAACAGATGGCTGGATCAAGTGAACAGGCAGCGGAGGCCATGGAGGTTGCTAATCA
GACTAGGCAGATGGTACATGCAATGAGAACTATTGGGACTCATCCTAGTTCCAGTACTGGTCTGAAAGATGA
CCTTCTTGAAAATTTGCAGGCCTATCAGAAACGRATGGGAGTGCAGATGCAGCGGTTTAAATGATCCACTCG
CCATTGCAGCAAATATCATTGGGATCTTGCACCTGATATTGTGGATTACTGATCGTCTTTTTTTCAAATGTA
TTTATCGTCGCTTTAAATACGGTTTGAAAAGAGGGCCTTCTACGGAAGGAGTGCCTGAGTCCATGAGGGAAG
AATATCAACAGGAACAGCAGAGTGCTGTGGATGTTGACGATGGTCATTTTGTCAACATAGAGCTAGAGTAA-
-------------------
>A/swine/Indiana/17TOSU1042/2017/1-994
---------------ATATTTAAAGATGAGTCTTCTAACCGAGGTCGAAACGTACGTTCTTTCTATCATACC
GTCAGGCCCCCTCAAAGCCGAGATTGCGCAGAGACTGGAAAGTGTCTTTGCAGGAAAGAATACAGACCTTGA
GGCTCTCATGGAATGGCTAAAGACAAGACCAATCTTGTCACCTTTGACTAAGGGAATTTTAGGATTTGTGTT
CACGCTCACCGTGCCCAGTGAGCGAGGACTGCAGCGTAGACGCTTTGTCCAAAATGCCCTGAATGGGAATGG
GGACCCAAACAACATGGATAGAGCAGTTAAACTATACAAGAAGCTCAAAAGAGAAATAACGTTCCATGGGGC
CAAGGAGGTGTCACTAAGCTATTCAACTGGTGCACTTGCCAGTTGCATGGGCCTCATATACAACAGGATGGG
AACAGTGACCACAGAAGCTGCTTTTGGTCTAGTGTGTGCCACTTGTGAACAGATTGCTGATTCACAGCATCG
GTCTCACAGACAGATGGCTACAACCACCAATCCACTAATCAGGCATGAGAACAGAATGGTGCTGGCTAGCAC
TACGGCAAAGGCTATGGAACAGATGGCTGGATCAAGTGAACAGGCAGCGGAGGCCATGGAGATTGCTAATCA
GACTAGGCAGATGGTACATGCAATGAGAACTATTGGGACTCATCCTAGTTCCAGTACTGGTCTGAAAGATGA
CCTTCTTGAAAATTTGCAGGCCTATCAGAAACGAATGGGAGTGCAGATGCAGCGGTTTAAGTGATCCACTCG
CCATTGCAGCAAATATCATCGGGATCTTGCACCTGATATTGTGGATTACTGATCGTCTTTTTTTCAAATGTA
TTTATCGTCGCTTTAAATACGGTTTGAAAAGAGGGCCTTCTACGGAAGGAGTGCCTGAGTCCATGAGGGAAG
AATATCAACAGGAACAGCAGAGTGCTGTGGATGTTGACGATGGTCATTTTGTCAACATAGAGCTGGAGTAAA
A------------------
>A/swine/Iowa/17TOSU3618/2017/1-999
-------------AGATATTTAAAGATGAGTCTTCTAACCGAGGTCGAAACGTACGTTCTTTCTATCATACC
GTCAGGCCCCCTCAAAGCCGAGATCGCGCAGAGACTGGAAAGTGTCTTTGCAGGAAAAAACACAGATCTTGA
AGCTCTCATGGAATGGCTAAAGACAAGACCAATCTTGTCACCTCTGACTAAGGGAATTTTAGGATTTGTGTT
CACGCTCACCGTGCCCAGTGAGCGAGGACTGCAGCGTAGACGCTTTGTCCAAAATGCCCTGAATGGGAATGG
GGACCCAAACAACATGGATAGAGCAGTTAAACTATACAAGAAGCTCAAAAGAGAAATAACATTCCATGGGGC
CAAGGAGGTGTCACTAAGCTATTCAACTGGTGCACTTGCCAGTTGCATGGGCCTCATATACAACAGGATGGG
AACAGTGACCACAGAAGCTGCTTTTGGTCTAGTGTGTGCCACTTGTGAACAGATTGCTGATTCACAGCATCG
GTCTCACAGACAAATGGCTACAACCACCAATCCACTAATCAGGCATGAAAACAGAATGGTGCTGGCTAGCAC
TACGGCAAAGGCTATGGAACAGATGGCTGGATCGAGTGAACAGGCAGCGGAGGCCATGGAGGTTGCTAATCA
GACTAGGCAGATGGTACATGCAATGAGAACTATTGGGACTCATCCTAGCTCCAGTACTGGTCTGAAAGATGA
CCTTCTTGAAAATTTGCAGGCCTACCAGAAGCGAATGGGAGTGCAGATGCAGCGATTCAAATGATCCTCTCG
CCATTGCAGCAAATATCATTGGGATCTTGCACCTGATATTGTGGATTGCTGATCGTCTTTTTTTCAAATGTA
TTTATCGTCGCTTTAAATACGGTTTGAAAAGAGGGCCTTCAACGGAAGGAGTGCCTGAGTCCATGAGGGAAG
AATACCAACAGGAACAGCAGAGTGCTGTGGATGTTGACGATGGTCATTTTGTCAACATAGAGCTAGAGTAAA
AAAC---------------
>A/swine/Ohio/17TOSU4320/2017/1-1003
-----------GTAGATATTTAAAGATGAGTCTTCTAACCGAGGTCGAAACGTACGTTCTTTCTATCATACC
GTCAGGCCCCCTCAAAGCCGAGATTGCGCAGAGACTGGAAAGTGTCTTTGCAGGAAAGAATACAGACCTTGA
GGCTCTCATGGAATGGCTAAAGACAAGACCAATCTTGTCACCTTTGACTAAGGGAATTTTAGGATTTGTGTT
CACGCTCACCGTGCCCAGTGAGCGAGGACTGCAGCGTAGACGCTTTGTCCAAAATGCCCTGAATGGGAATGG
GGACCCAAACAACATGGATAGAGCAGTTAAACTATACAAGAAGCTCAAAAGAGAAATAACGTTCCATGGGGC
CAAGGAGGTGTCACTAAGCTATTCAACTGGTGCACTTGCCAGTTGCATGGGCCTCATATACAACAGAATGGG
AACAGTGACCACAGAAGCTGCTTTTGGTCTAGTGTGTGCCACTTGTGAACAGATTGCTGATTCACAGCATCG
GTCTCACAGACAGATGGCTACAACCACCAATCCACTAATCAGGCATGAGAACAGAATGGTGCTGGCTAGCAC
TACGGCAAAGGCTATGGAACAGATGGCTGGATCAAGTGAACAGGCAGCGGAGGCCATGGAGATTGCTAATCA
GACTAGGCAGATGGTACATGCAATGAGAACTATTGGGACTCATCCTAGTTCCAGTACTGGTCTGAAAGATGA
CCTTCTTGAAAATTTGCAGGCCTATCAGAAACGAATGGGAGTGCAGATGCAGCGGTTTAAGTGATCCACTCG
CCATTGCAGCAAATATCATCGGGATCTTGCACCTGATATTGTGGATTACTGATCGTCTTTTTTTCAAATGTA
TTTATCGTCGCTTTAAATACGGTTTGAAAAGAGGGCCTTCTACGGAAGGAGTGCCTGAGTCCATGAGGGAAG
AATATCAACAGGAACAGCAGAGTGCTGTGGATGTTGACGATGGTCATTTTGTCAACATAGAGCTGGAGTAAA
AAACTA-------------
>A/swine/Iowa/17TOSU3127/2017/1-989
-------------------------ATGAGTCTTCTAACCGAGGTCGAAACGTACGTTCTTTCTATCATACC
GTCAGGCCCCCTCAAAGCCGAGATTGCGCAGAGACTGGAAAGTGTCTTTGCAGGAAAGAATACAGACCTTGA
GGCTCTCATGGAATGGCTAAAGACAAGACCAATCTTGTCACCTTTGACTAAGGGAATTTTAGGATTTGTGTT
CACGCTCACCGTGCCCAGTGAGCGAGGACTGCAGCGTAGACGTTTTGTCCAAAATGCCCTGAATGGGAATGG
GGACCCAAACAACATGGATAGAGCAGTTAAACTATACAAGAAGCTCAAAAGAGAAATAACGTTCCATGGGGC
CAAGGAGGTGTCACTAAGCTATTCAACTGGTGCACTTGCCAGTTGCATGGGCCTCATATACAACAGGATGGG
AACAGTGACCACAGAAGCTGCTTTTGGTCTAGTGTGTGCCACTTGTGAACAGATTGCTGATTCACAGCATCG
GTCTCACAGACAGATGGCTACAACCACCAATCCACTAATCAGGCATGAGAACAGAATGGTGCTGGCTAGCAC
TACGGCAAAGGCTATGGAACAGATGGCTGGATCGAGTGAACAGGCAGCGGAGGCCATGGAGGTTGCTAATCA
GACTAGGCAGATGGTACATGCAATGAGAACTATTGGGACTCATCCTAGTTCCAGTACTGGTCTGAAAGATGA
CCTTCTTGAAAATTTGCAGGCCTATCAGAAGCGAATGGGAGTGCAGATGCAGCGGTTTAAGTGATCCTCTCG
CCATTGCAGCAAATATCATTGGGATCTTGCACCTGATATTGTGGATTACTGATCGTCTTTTTTTCAAATGTA
TTTATCGTCGCTTTAAATACGGTTTGAAAAGAGGGCCTTCTACGGAAGGAGTGCCTGAGTCCATGAGGGAAG
AATATCAACAGGAAAAGCAGAGTGCTGTGGATGTTGACGATGGTCATTTTGTCAACATAGAGCTGGAGTAAA
AAACTA-------------
>A/swine/Iowa/17TOSU3617/2017/1-1003
-----------GTAGATATTTAAAGATGAGTCTTCTAACCGAGGTCGAAACGTACGTTCTTTCTATCATACC
GTCAGGCCCCCTCAAAGCCGAGATCGCGCAGAGACTGGAAAGTGTCTTTGCAGGAAAAAACACAGATCTTGA
AGCTCTCATGGAATGGCTAAAGACAAGACCAATCTTGTCACCTCTGACTAAGGGAATTTTAGGATTTGTGTT
CACGCTCACCGTGCCCAGTGAGCGAGGACTGCAGCGTAGACGCTTTGTCCAAAATGCCCTGAATGGGAATGG
GGACCCAAACAACATGGATAGAGCAGTTAAACTATACAAGAAGCTCAAAAGAGAAATAACATTCCATGGGGC
CAAGGAGGTGTCACTAAGCTATTCAACTGGTGCACTTGCCAGTTGCATGGGCCTCATATACAACAGGATGGG
AACAGTGACCACAGAAGCTGCTTTTGGTCTAGTGTGTGCCACTTGTGAACAGATTGCTGATTCACAGCATCG
GTCTCACAGACAAATGGCTACAACCACCAATCCACTAATCAGGCATGAAAACAGAATGGTGCTGGCTAGCAC
TACGGCAAAGGCTATGGAACAGATGGCTGGATCGAGTGAACAGGCAGCGGAGGCCATGGAGGTTGCTAATCA
GACTAGGCAGATGGTACATGCAATGAGAACTATTGGGACTCATCCTAGCTCCAGTACTGGTCTGAAAGATGA
CCTTCTTGAAAATTTGCAGGCCTACCAGAAGCGAATGGGAGTGCAGATGCAGCGATTCAAATGATCCTCTCG
CCATTGCAGCAAATATCATTGGGATCTTGCACCTGATATTGTGGATTGCTGATCGTCTTTTTTTCAAATGTA
TTTATCGTCGCTTTAAATACGGTTTGAAAAGAGGGCCTTCAACGGAAGGAGTGCCTGAGTCCATGAGGGAAG
AATACCAACAGGAACAGCAGAGTGCTGTGGATGTTGACGATGGTCATTTTGTCAACATAGAGCTAGAGTAAA
AAACTA-------------
>A/swine/Indiana/17TOSU1724/2017/1-999
-------------AGATATTTAAAGATGAGTCTTCTAACCGAGGTCGAAACGTACGTTCTTTCTATCATACC
GTCAGGCCCCCTCAAAGCCGAGATTGCGCAGAGACTGGAAAGTGTCTTTGCAGGAAAGAATACAGACCTTGA
GGCTCTCATGGAATGGCTAAAGACAAGACCAATCTTGTCACCTTTGACTAAGGGAATTTTAGGATTTGTGTT
CACGCTCACCGTGCCCAGTGAGCGAGGACTGCAGCGTAGACGCTTTGTCCAAAATGCCCTGAATGGGAATGG
GGACCCAAACAACATGGATAGAGCAGTTAAACTATACAAGAAGCTCAAAAGAGAAATAACGTTCCATGGGGC
CAAGGAGGTGTCACTAAGCTATTCAACTGGTGCACTTGCCAGTTGCATGGGCCTCATATACAACAGGATGGG
AACAGTGACCACAGAAGCTGCTTTTGGTCTAGTGTGTGCCACTTGTGAACAGATTGCTGATTCACAGCATCG
ATCTCACAGACAAATGGTTGCTACCACCAATCCACTAATCAGGCATGAAAACAGAATGGTGCTGGCTAGCAC
TACTGCAAAGGCTATGGAACAGATGGCTGGATCGAGTGAACAGGCAGCAGAGGCCATGGAGGTTGCTAATCA
GACTAGGCAGATGGTACATGCAATGAGGACTATTGGGACTCATCCTAGCTCCAGTGCTGGTCTGAAGGATGA
CCTTCTTGAAAATTTACAGGCCTACCAGAAGCGAATGGGAGTGCAAATGCAGCGATTCAAGTGATCCTCTCG
TCATTGCAGCAAATATCATTGGGATCTTGCACCTGATATTGTGGATTACTGATCGTCTTTTTTTCAAATGTA
TTTATCGTCGCTTTAAATACGGTTTGAAAAGAGGGCCTCCTACAGAAGGAGTGCCTGAGTCCATGAGGGAAG
AATATCAACAGGAACAGCAGAGTGCTGTAGATGTTGACGATGGTCATTTTGTCAACATAGAGCTAGAGTAAA
AAAC---------------
>A/swine/Ohio/17TOSU6926/2017/1-1003
-----------GTAGATATTTAAAGATGAGTCTTCTAACCGAGGTCGAAACGTACGTTCTTTCTATCATACC
GTCAGGCCCCCTCAAAGCCGAGATCGCGCAGAGACTGGAAAGTGTCTTTGCAGGAAAAAACACAGATCTTGA
AGCTCTCATGGAATGGCTAAAGACAAGACCAATCTTGTCACCTCTGACTAAGGGAATTTTAGGATTTGTGTT
CACGCTCACCGTGCCCAGTGAGCGAGGACTGCAGCGTAGACGCTTTGTCCAAAATGCCCTGAATGGGAATGG
GGACCCAAACAACATGGATAGAGCAGTTAAACTATACAAGAAGCTCAAAAGAGAAATAACATTCCATGGGGC
CAAGGAGGTGTCACTAAGCTATTCAACTGGTGCACTTGCCAGTTGCATGGGCCTCATATACAACAGGATGGG
AACAGTGACCACAGAAGCTGCTTTTGGTCTAGTGTGTGCCACTTGTGAACAGATTGCTGATTCACAGCATCG
GTCTCACAGACAAATGGCTACAACCACCAATCCACTAATCAGGCATGAAAACAGAATGGTGCTGGCTAGCAC
TACGGCAAAGGCTATGGAACAGATGGCTGGATCGAGTGAACAGGCAGTGGAGGCCATGGAGGTTGCTAATCA
GACTAGGCAGATGGTACATGCAATGAGAACTATTGGGACTCATCCTAGCTCCAGTACTGGTCTGAAAGATGA
CCTTCTTGAAAATTTGCAGGCCTACCAGAAGCGAATGGGAGTGCAGATGCAGCGATTCAAATGATCCTCTCG
CCATTGCAGCAAATATCATTGGGATCTTGCACCTGATATTGTGGATTGCTGATCGTCTTTTTTTCAAATGTA
TTTATCGTCGCTTTAAATACGGTTTGAAAAGAGGGCCTTCAACGGAAGGAGTGCCTGAGTCCATGAGGGAAG
AATACCAACAGGAACAGCAGAGTGCTGTGGATGTTGACGATGGTCATTTTGTCAACATAGAGCTAGAGTAAA
AAACTA-------------
>A/swine/Indiana/17TOSU1052/2017/1-999
-------------AGATATTTAAAGATGAGTCTTCTAACCGAGGTCGAAACGTACGTTCTTTCTATCATCCC
GTCAGGCCCCCTCAAAGCCGAGATCGCGCAGAGACTGGAAAGTGTATTTGCAGGAAAGAACACAGATCTTGA
GGCTCTCATGGAATGGCTAAAGACAAGACCAATCTTGTCACCTCTGACTAAGGGAATTTTAGGATTTGTGTT
CACGCTCACCGTGCCCAGTGAGCGAGGACTGCAGCGTAGACGCTTTGTCCAAAATGCCCTAAATGGGAATGG
GGACCCGAACAACATGGATAGAGCAGTTAAACTATACAAGAAGCTCAAAAGAGAAATAACGTTCCATGGGGC
TAAAGAGGTGTCACTAAGCTATTCAACTGGTGCACTTGCCAGTTGCCTGGGCCTCATATACAACAGGATGGG
AACAGTGACCACAGAAGCTGCTTTTGGTCTAGTGTGTGCCACTTGTGAACAGATTGCTGATTCACAGCATCG
ATCTCACAGACAAATGGTTGCTACCACCAATCCACTAATCAGGCATGAAAACAGAATGGTGCTGGCTAGCAC
TACTGCAAAGGCTATGGAACAGATGGCTGGATCGAGTGAACAGGCAGCAGAGGCCATGGAGGTTGCTAATCA
GACTAGGCAGATGGTACATGCAATGAGGACTATTGGGACTCATCCTAGCTCCAGTGCTGGTCTGAAGGATGA
CCTTCTTGAAAATTTACAGGCCTACCAGAAGCGAATGGGAGTGCAAATGCAGCGATTCAAGTGATCCTCTCG
TCATTGCAGCAAATATCATTGGGATCTTGCACCTGATATTGTGGATTACTGATCGTCTTTTTTTCAAATGTA
TTTATCGTCGCTTTAAATACGGTTTGAAAAGAGGGCCTCCTACAGAAGGAGTGCCTGAGTCCATGAGGGAAG
AATATCAACAGGAACAGCAGAGTGCTGTAGATGTTGACGATGGTCATTTTGTCAACATAGAGCTAGAGTAAA
AAAC---------------
>A/swine/Ohio/17TOSU1093/2017/1-987
--------------------TAAAGATGAGTCTTCTAACCGAGGTCGAAACGTACGTTCTTTCTATCATCCC
GTCAGGCCCCCTCAAAGCCGAGATCGCGCAGAGACTGGAAAGTGTATTTGCAGGAAAGAACACAGATCTTGA
GGCTCTCATGGAATGGCTAAAGACAAGACCAATCTTGTCACCTCTGACTAAGGGAATTTTAGGATTTGTGTT
CACGCTCACCGTGCCCAGTGAGCGAGGACTGCAGCGTAGACGCTTTGTCCAAAATGCCCTAAATGGGAATGG
GGACCCGAACAACATGGATAGAGCAGTTAAACTATACAAGAAGCTCAAAAGAGAAATAACGTTCCATGGGGC
TAAAGAGGTGTCACTAAGCTATTCAACTGGTGCACTTGCCAGTTGCCTGGGCCTCATATACAACAGGATGGG
AACAGTGACCACAGAAGCTGCTTTTGGTCTAGTGTGTGCCACTTGTGAACAGATTGCTGATTCACAGCATCG
ATCTCACAGACAAATGGTTGCTACCACCAATCCACTAATCAGGCATGAAAACAGAATGGTGCTGGCTAGCAC
TACTGCAAAGGCTATGGAACAGATGGCTGGATCGAGTGAACAGGCAGCAGAGGCCATGGAGGTTGCTAATCA
GACTAGGCAGATGGTACATGCAATGAGGACTATTGGGACTCATCCTAGCTCCAGTGCTGGTCTGAAGGATGA
CCTTCTTGAAAATTTACAGGCCTACCAGAAGCGAATGGGAGTGCAAATGCAGCGATTCAAGTGATCCTCTCG
TCATTGCAGCAAATATCATTGGGATCTTGCACCTGATATTGTGGATTACTGATCGTCTTTTTTTCAAATGTA
TTTATCGTCGCTTTAAATACGGTTTGAAAAGAGGGCCTCCTACAGAAGGAGTGCCTGAGTCCATGAGGGAAG
AATATCAACAGGAACAGCAGAGTGCTGTAGATGTTGACGATGGTCATTTTGTCAACATAGAGCTAGAGTAA-
-------------------
>A/swine/Indiana/17TOSU1375/2017/1-994
---------------ATATTTAAAGATGAGTCTTCTAACCGAGGTCGAAACGTACGTTCTTTCTATCATACC
GTCAGGCCCCCTCAAAGCCGAGATTGCGCAGAGACTGGAAAGTGTCTTTGCAGGAAAGAATACAGACCTTGA
GGCTCTCATGGAATGGCTAAAGACAAGACCAATCTTGTCACCTTTGACTAAGGGAATTTTAGGATTTGTGTT
CACGCTCACCGTGCCCAGTGAGCGAGGACTGCAGCGTAGACGCTTTGTCCAAAATGCCCTGAATGGGAATGG
GGACCCAAACAACATGGATAGAGCAGTTAAACTATACAAGAAGCTCAAAAGAGAAATAACGTTCCATGGGGC
CAAGGAGGTGTCACTAAGCTATTCAACTGGTGCACTTGCCAGTTGCATGGGCCTCATATACAACAGGATGGG
AACAGTGACCACAGAAGCTGCTTTTGGTCTAGTGTGTGCCACTTGTGAACAGATTGCTGATTCACAACATCG
GTCTCACAGACAGATGGCTACAACCACCAATCCACTAATCAGGCATGAGAACAGAATGGTGCTGGCTAGCAC
TACGGCAAAGGCTATGGAACAGATGGCTGGATCAAGTGAACAGGCAGCGGAGGCCATGGAGATTGCTAATCA
GACTAGGCAGATGGTACATGCAATGAGAACTATTGGGACTCATCCTAGTTCCAGTACTGGTCTGAAAGATGA
CCTTCTTGAAAATTTGCAGGCCTATCAGAAACGAATGGGAGTGCAGATGCAGCGGTTTAAGTGATCCACTCG
CCATTGCAGCAAATATCATCGGGATCTTGCACCTGATATTGTGGATTACTGATCGTCTTTTTTTCAAATGTA
TTTATCGTCGCTTTAAATACGGTTTGAAAAGAGGGCCTTCTACGGAAGGAGTGCCTGAGTCCATGAGGGAAG
AATATCAACAGGAACAGCAGAGTGCTGTGGATGTTGACGATGGTCATTTTGTCAACATAGAGCTGGAGTAAA
A------------------
>A/swine/Indiana/17TOSU1111/2017/1-999
-------------AGATATTTAAAGATGAGTCTTCTAACCGAGGTCGAAACGTACGTTCTTTCTATCATACC
GTCAGGCCCCCTCAAAGCCGAGATTGCGCAGAGACTGGAAAGTGTCTTTGCAGGAAAGAATACAGACCTTGA
GGCTCTCATGGAATGGCTAAAGACAAGACCAATCTTGTCACCTTTGACTAAGGGAATTTTAGGATTTGTGTT
CACGCTCACCGTGCCCAGTGAGCGAGGACTGCAGCGTAGACGCTTTGTCCAAAATGCCCTGAATGGGAATGG
GGACCCAAACAACATGGATAGAGCAGTTAAACTATACAAGAAGCTCAAAAGAGAAATAACGTTCCATGGGGC
CAAGGAGGTGTCACTAAGCTATTCAACTGGTGCACTTGCCAGTTGCATGGGCCTCATATACAACAGGATGGG
AACAGTGACCACAGAAGCTGCTTTTGGTCTAGTGTGTGCCACTTGTGAACAGATTGCTGATTCACAGCATCG
GTCTCACAGACAGATGGCTACAACCACCAATCCACTAATCAGGCATGAGAACAGAATGGTGCTGGCTAGCAC
TACGGCAAAGGCTATGGAACAGATGGCTGGATCAAGTGAACAGGCAGCGGAGGCCATGGAGATTGCTAATCA
GACTAGGCAGATGGTACATGCAATGAGAACTATTGGGACTCATCCTAGTTCCAGTACTGGTCTGAAAGATGA
CCTTCTTGAAAATTTGCAGGCCTATCAGAAACGAATGGGAGTGCAGATGCAGCGGTTTAAGTGATCCACTCG
CCATTGCAGCAAATATCATCGGGATCTTGCACCTGATATTGTGGATTACTGATCGTCTTTTTTTCAAATGTA
TTTATCGTCGCTTTAAATACGGTTTGAAAAGAGGGCCTTCTACGGAAGGAGTGCCTGAGTCCATGAGGGAAG
AATATCAACAGGAACAGCAGAGTGCTGTGGATGTTGACGATGGTCATTTTGTCAACATAGAGCTGGAGTAAA
AAAC---------------
>A/swine/Ohio/17TOSU7274/2017/1-992
----------------------AAGATGAGTCTTCTAACCGAGGTCGAAACGTACGTTCTTTCTATCATACC
GTCAGGCCCCCTCAAAGCCGAGATTGCGCAGAGACTGGAAAGTGTCTTTGCAGGAAAGAATACAGACCTTGA
GGCTCTCATGGAATGGCTAAAGACAAGACCAATCTTGTCACCTTTGACTAAGGGAATTTTAGGATTTGTGTT
CACGCTCACCGTGCCCAGTGAGCGAGGACTGCAGCGTAGACGCTTTGTCCAAAATGCCCTGAATGGGAATGG
GGACCCAAACAACATGGATAGAGCAGTTAAACTATACAAGAAGCTCAAAAGAGAAATAACGTTCCATGGGGC
CAAGGAGGTGTCACTAAGCTATTCAACTGGTGCACTTGCCAGTTGCATGGGCCTCATATACAACAGGATGGG
AACAGTGACCACAGAAGCTGCTTTTGGTCTAGTGTGTGCCACTTGTGAACAGATTGCTGATTCACAGCATCG
GTCTCACAGACAGATGGCTACAACCACCAATCCACTAATCAGGCATGAGAACAGAATGGTGCTGGCTAGCAC
TACGGCAAAGGCTATGGAACAGATGGCTGGATCAAGTGAACAGGCAGCGGAGGCCATGGAGATTGCTAATCA
GACTAGGCAGATGGTACATGCAATGAGAACTATTGGGACTCATCCTAGTTCCAGTACTGGTCTGAAAGATGA
CCTTCTTGAAAATTTGCAGGCCTATCAGAAACGAATGGGAGTGCAGATGCAGCGGTTTAAGTGATCCACTCG
CCATTGCAGCAAATATCATCGGGATCTTGCACCTGATATTGTGGATTACTGATCGTCTTTTTTTCAAATGTA
TTTATCGTCGCTTTAAATACGGTTTGAAAAGAGGGCCTTCTACGGAAGGAGTGCCTGAGTCCATGAGGGAAG
AATATCAACAGGAACAGCAGAGTGCTGTGGATGTTGACGATGGTCATTTTGTCAACATAGAGCTGGAGTAAA
AAACTA-------------
>A/swine/Indiana/17TOSU1367/2017/1-1003
-----------GTAGATATTTAAAGATGAGTCTTCTAACCGAGGTCGAAACGTACGTTCTTTCTATCATACC
GTCAGGCCCCCTCAAAGCCGAGATTGCGCAGAGACTGGAAAGTGTCTTTGCAGGAAAGAATACAGACCTTGA
GGCTCTCATGGAATGGCTAAAGACAAGACCAATCTTGTCACCTTTGACTAAGGGAATTTTAGGATTTGTGTT
[truncated: 491,357 more chars]
