# Supplementary material for: RT-LAMP as Diagnostic Tool for Influenza—A Virus Detection in Swine
Source: Vet Sci. 2023 Mar 13;10(3):220. doi: 10.3390/vetsci10030220 (PMC10051247; doi:10.3390/vetsci10030220)
Supplement: Supplementary file 1 [file vetsci-10-00220-s001.zip › cell_culture_LAMP1.xlsx]

## Sheet: Sheet1
Sample name	LAMP Cq	Minutes to positive	Paired PCR CT	Standard Deviation
H1N1 IA	32.038	12.5143	20.341	0.665842
H1N1 IA	33.767	12.4167	20.499
H1N1 IA	37.232	13.6157	22.221
H1N1 MN	39.909	15.303	20.17	0.620645
H1N1 MN	36.733	14.2443	19.704
H1N1 MN	36.008	14.0027	19.178
H1N1 MN	36.005	14.0017	18.955
H1N1 TX	31.881	12.627	18.454	0.221045
H1N1 TX	31.11	12.37	18.46
H1N1 TX	32.278	12.7593	18.294
H1N1 TX	32.661	12.887	18.341
H1N2 CO	32.444	14.08	20.834	0.712901
H1N2 CO	31.328	15.498	20.919
H1N2 CO	32.683	14.918	18.012
H1N2 IA	33.485	12.8147	20.62	0.296868
H1N2 IA	36.24	12.4427	20.959
H1N2 IA	40.494	12.8943	21.251
H1N2 IA	38.754	13.1617	21.319
H1N2 IN	31.543	11.0667	21.145	0.123771
H1N2 IN	31.25	11.003	21.216
H1N2 IN	34.847	10.8277	20.33
H3N2 IA	28.309	11.4363	22.768	0.787142
H3N2 IA	28.073	11.3577	23.377
H3N2 IA	32.276	12.7587	23.241
H3N2 NE	27.2	12.6793	19.784	0.881637
H3N2 NE	27.009	13.2557	19.812
H3N2 NE	26.483	14.4107	20.362
H3N2 NY	21.276	9.092	17.809	1.97669
H3N2 NY	21.344	9.11467	18.058
H3N2 NY	31.581	12.527	20.241
