# Supplementary material for: RT-LAMP as Diagnostic Tool for Influenza—A Virus Detection in Swine
Source: Vet Sci. 2023 Mar 13;10(3):220. doi: 10.3390/vetsci10030220 (PMC10051247; doi:10.3390/vetsci10030220)
Supplement: Supplementary file 1 [file vetsci-10-00220-s001.zip › lamp_IAV_detection_swine_pig_samples1.csv]

Date	Sample name	Farm #	Positive samle CT	Positive sample minutes	Paired PCR CT		Binary
7/21/2021	2	1	37.508	14.5	21.22	Positive	1
7/21/2021	6	1	75	35	40	Negative	0
7/21/2021	7	1	42.446	16.15	24.42	Positive	1
7/21/2021	9	1	40.473	15.49	27.49	Positive	1
7/21/2021	12	1	57.601	21.2	22.17	Positive	1
7/21/2021	14	1			40	Negative	0
7/21/2021	19	1	46.631	17.54	24.09	Positive	1
7/21/2021	22	1	45.384	17.13	14.93	Positive	1
7/21/2021	23	1	40.293	15.43	37.93	Positive	1
7/21/2021	24	1	40.919	15.64	24.66	Positive	1
7/21/2021	27	1	43.704	16.57	24.22	Positive	1
7/21/2021	29	1	44.094	16.7	21.7	Positive	1
7/21/2021	30	1	45.951	17.32	21.45	Positive	1
7/21/2021	33	1	41.818	15.94	20.87	Positive	1
7/21/2021	34	1	42.047	16.02	33.22	Positive	1
7/21/2021	37	1	46.306	17.44	26.28	Positive	1
7/21/2021	39	1	63.661	23.22	21.78	Positive	1
11/15/2021	2	1	29.842	11.94747925	33.987	Positive	1
11/15/2021	3	1	34.63	13.54341507	33.414	Positive	1
11/15/2021	4	1	33.83	13.27676392	17.844	Positive	1
11/15/2021	5	1	28.05	11.34985352	23.349	Positive	1
11/15/2021	6	1	34.937	13.64571635	26.493	Positive	1
11/15/2021	7	1	32.411	12.80355072	19.348	Positive	1
11/15/2021	8	1	33.787	13.26228078	21.086	Positive	1
11/15/2021	9	1	34.018	13.33919779	26.48	Positive	1
11/15/2021	10	1	29.469	11.8229777	19.825	Positive	1
11/15/2021	11	1	33.596	13.19869614	19.674	Positive	1
11/15/2021	12	1	28.174	11.39122899	20.403	Positive	1
11/15/2021	13	1	36.75	14.2500089	20.931	Positive	1
11/15/2021	14	1	36.26	14.08660126	21.36	Positive	1
11/15/2021	15	1	32.341	12.7802213	17.706	Positive	1
11/15/2021	17	1	48.31	18.10342662	21.598	Positive	1
11/15/2021	18	1	38.621	14.87379201	22.357	Positive	1
11/15/2021	19	1	36.06	14.01996358	19.882	Positive	1
11/15/2021	20	1	35.178	13.72609711	22.544	Positive	1
5/18/2022	12	2	44.56028756	16.85342919	16.85342919	Positive	1
5/18/2022	12	2	45.8850391	17.29501303	16.85342919	Positive	1
5/18/2022	12	2	47.29950117	17.76650039	16.85342919	Positive	1
5/18/2022	29	2	46.56632813	17.52210938	17.52210938	Positive	1
5/18/2022	29	2	54.13198436	20.04399479	17.52210938	Positive	1
5/18/2022	30	2	50.01047813	18.67015938	18.67015938	Positive	1
5/18/2022	30	2	50.51524615	18.83841538	18.67015938	Positive	1
5/18/2022	30	2	58.47219744	21.49073248	18.67015938	Positive	1
5/18/2022	41	2	48.76962926	18.25654309	18.25654309	Positive	1
5/18/2022	41	2	48.87548084	18.29182695	18.25654309	Positive	1
5/18/2022	41	2	54.60893785	20.20297928	18.25654309	Positive	1
5/18/2022	42	2	41.82256038	15.94085346	15.94085346	Positive	1
5/18/2022	42	2	44.195883	16.731961	15.94085346	Positive	1
5/18/2022	42	2	46.15449639	17.38483213	15.94085346	Positive	1
5/18/2022	13	2	46.08318339	17.36106113	17.36106113	Positive	1
5/18/2022	13	2	60.37093729	22.12364576	17.36106113	Positive	1
5/18/2022	13	2	62.57182576	22.85727525	17.36106113	Positive	1
5/18/2022	43	2	46.66835636	17.55611879	31.93	Positive	1
5/18/2022	43	2	51.06478094	19.02159365	31.86	Positive	1
5/18/2022	43	2	66.95330028	24.31776676	31.86	Positive	1
5/18/2022	44	2	44.10285297	16.70095099	36.96	Positive	1
5/18/2022	44	2	51.47138161	19.1571272	36.96	Positive	1
5/18/2022	44	2	75	27	36.96	Positive	1
5/18/2022	45	2	50.1873476	18.72911587	36.109	Positive	1
7/21/2022	1	3	31.87263	20.84733333	17.483	Positive	1
7/21/2022	1	3	31.28767	12.42922333	17.483	Positive	1
7/21/2022	1	3	31.4124	12.4708	17.483	Positive	1
7/21/2022	2	3	30.49581	12.16527	15.681	Positive	1
7/21/2022	2	3	29.35197	11.78399	15.681	Positive	1
7/21/2022	2	3	30.11818	12.03939333	15.681	Positive	1
7/21/2022	3	3	49.14923	18.38307667	24.382	Positive	1
7/21/2022	3	3	47.98568	17.99522667	24.382	Positive	1
7/21/2022	3	3	48.7346	18.24486667	24.382	Positive	1
7/21/2022	4	3	38.722	14.90733333	21.593	Positive	1
7/21/2022	4	3	40.6154	15.53846667	21.593	Positive	1
7/21/2022	4	3	34.15461	13.38487	21.593	Positive	1
7/21/2022	5	3	27.9308	11.31026667	15.419	Positive	1
7/21/2022	5	3	27.75519	11.25173	15.419	Positive	1
7/21/2022	5	3	28.46107	11.48702333	15.419	Positive	1
7/21/2022	6	3	35.95157	13.98385667	26.803	Positive	1
7/21/2022	6	3	43.30578	16.43526	26.803	Positive	1
7/21/2022	6	3	41.53658	15.84552667	26.803	Positive	1
7/21/2022	7	3	28.22939	11.40979667	15.597	Positive	1
7/21/2022	7	3	30.3694	12.12313333	15.597	Positive	1
7/21/2022	7	3	29.30057	11.76685667	15.597	Positive	1
7/21/2022	8	3	32.50946	12.83648667	15.902	Positive	1
7/21/2022	8	3	32.32916	12.77638667	15.902	Positive	1
7/21/2022	8	3	32.65395	12.88465	15.902	Positive	1
7/21/2022	9	3	32.81728	12.93909333	17	Positive	1
7/21/2022	9	3	33.01366	13.00455333	17	Positive	1
7/21/2022	9	3	32.15945	12.71981667	17	Positive	1
10/15/2022	8	4	100	35.33333333	40	Negative	0
10/15/2022	8	4	100	35.33333333	40	Negative	0
10/15/2022	8	4	100	35.33333333	40	Negative	0
10/15/2022	8	4	100	35.33333333	40	Negative	0
10/15/2022	20	4	100	35.33333333	40	Negative	0
10/15/2022	20	4	100	35.33333333	40	Negative	0
10/15/2022	20	4	38.58301043	14.86100348	40	Negative	0
10/15/2022	20	4	100	35.33333333	40	Negative	0
10/15/2022	21	4	100	35.33333333	40	Negative	0
10/15/2022	21	4	100	35.33333333	40	Negative	0
10/15/2022	21	4	100	35.33333333	40	Negative	0
10/15/2022	21	4	100	35.33333333	40	Negative	0
10/15/2022	32	4	99.87773529	35.29257843	40	Negative	0
10/15/2022	32	4	87.42968745	31.14322915	40	Negative	0
10/15/2022	32	4	87.8811323	31.29371077	40	Negative	0
10/15/2022	32	4	100	35.33333333	40	Negative	0
10/15/2022	33	4	100	35.33333333	40	Negative	0
10/15/2022	33	4	100	35.33333333	40	Negative	0
10/15/2022	33	4	100	35.33333333	40	Negative	0
10/15/2022	33	4	51.13711622	19.04570541	40	Negative	0
10/15/2022	33	4	78.78921147	28.26307049	40	Negative	0
10/15/2022	33	4	100	35.33333333	40	Negative	0
10/15/2022	33	4	100	35.33333333	40	Negative	0
10/15/2022	33	4	42.09885015	16.03295005	40	Negative	0
10/15/2022	33	4	44.83230762	16.94410254	40	Negative	0
10/15/2022	44	4	94.14757599	33.38252533	40	Negative	0
10/15/2022	44	4	93.55908171	33.18636057	40	Negative	0
10/15/2022	44	4	100	35.33333333	40	Negative	0
10/15/2022	44	4	75.96716098	27.32238699	40	Negative	0
10/15/2022	45	4	44.30630694	16.76876898	40	Negative	0
10/15/2022	45	4	100	35.33333333	40	Negative	0
10/15/2022	45	4	94.91590225	33.63863408	40	Negative	0
10/15/2022	45	4	100	35.33333333	40	Negative	0
10/15/2022	55	4	91.3081954	32.43606513	40	Negative	0
10/15/2022	55	4	98.25923234	34.75307745	40	Negative	0
10/15/2022	55	4	100	35.33333333	40	Negative	0
10/15/2022	55	4	100	35.33333333	40	Negative	0
10/15/2022	57	4	100	35.33333333	40	Negative	0
10/15/2022	57	4	100	35.33333333	40	Negative	0
10/15/2022	57	4	100	35.33333333	40	Negative	0
10/15/2022	57	4	100	35.33333333	40	Negative	0
10/15/2022	57	4	100	35.33333333	40	Negative	0
10/15/2022	57	4	100	35.33333333	40	Negative	0
10/15/2022	57	4	100	35.33333333	40	Negative	0
10/15/2022	57	4	100	35.33333333	40	Negative	0
10/15/2022	57	4	100	35.33333333	40	Negative	0
11/1/2022	18	3	101	35.66666667	40	Negative	0
11/1/2022	18	3	101	35.66666667	40	Negative	0
11/1/2022	18	3	101	35.66666667	40	Negative	0
11/1/2022	18	3	72.95555	26.31851667	40	Negative	0
11/1/2022	18	3	101	35.66666667	40	Negative	0
11/2/2022	18	3	100	35.33333333	40	Negative	0
11/2/2022	18	3	100	35.33333333	40	Negative	0
11/2/2022	18	3	67.79665	24.59888333	40	Negative	0
11/2/2022	18	3	100	35.33333333	40	Negative	0
11/2/2022	19	3	87.35281	31.11760333	40	Negative	0
11/2/2022	19	3	100	35.33333333	40	Negative	0
11/2/2022	19	3	61.28891	22.42963667	40	Negative	0
11/2/2022	19	3	65.03406	23.67802	40	Negative	0
11/2/2022	20	3	100	35.33333333	40	Negative	0
11/2/2022	20	3	100	35.33333333	40	Negative	0
11/2/2022	20	3	100	35.33333333	40	Negative	0
11/2/2022	20	3	100	35.33333333	40	Negative	0
11/10/2022	19	3	100	35.33333333	40	Negative	0
11/10/2022	19	3	100	35.33333333	40	Negative	0
11/10/2022	20	3	100	35.33333333	40	Negative	0
11/10/2022	20	3	100	35.33333333	40	Negative	0
11/22/2022	8	3	100	35.33333333	40	Negative	0
11/22/2022	8	3	100	35.33333333	40	Negative	0
11/22/2022	8	3	100	35.33333333	40	Negative	0
11/22/2022	8	3	100	35.33333333	40	Negative	0
11/22/2022	8	3	100	35.33333333	40	Negative	0
11/22/2022	8	3	100	35.33333333	40	Negative	0
11/22/2022	8	3	100	35.33333333	40	Negative	0
11/22/2022	8	3	100	35.33333333	40	Negative	0
11/22/2022	19	3	100	35.33333333	40	Negative	0
11/22/2022	19	3	100	35.33333333	40	Negative	0
11/22/2022	19	3	100	35.33333333	40	Negative	0
11/22/2022	31	3	100	35.33333333	40	Negative	0
11/22/2022	31	3	100	35.33333333	40	Negative	0
11/22/2022	31	3	100	35.33333333	40	Negative	0
11/22/2022	31	3	100	35.33333333	40	Negative	0
11/22/2022	31	3	72.264	26.088	40	Negative	0
11/22/2022	31	3	100	35.33333333	40	Negative	0
11/22/2022	31	3	100	35.33333333	40	Negative	0
11/22/2022	31	3	100	35.33333333	40	Negative	0
11/22/2022	43	3	100	35.33333333	40	Negative	0
11/22/2022	43	3	100	35.33333333	40	Negative	0
11/22/2022	43	3	100	35.33333333	40	Negative	0
11/22/2022	43	3	100	35.33333333	40	Negative	0
11/22/2022	43	3	100	35.33333333	40	Negative	0
11/22/2022	43	3	52.904	19.63466667	40	Negative	0
11/22/2022	43	3	100	35.33333333	40	Negative	0
11/22/2022	43	3	100	35.33333333	40	Negative	0
11/2/2022	20	3	100	35.33333333
11/2/2022	20	3	100	35.33333333
11/2/2022	20	3	100	35.33333333
11/10/2022	19	3	100	35.33333333
11/10/2022	19	3	100	35.33333333
11/10/2022	20	3	100	35.33333333
11/10/2022	20	3	100	35.33333333
11/22/2022	8	3	100	35.33333333
11/22/2022	8	3	100	35.33333333
11/22/2022	8	3	100	35.33333333
11/22/2022	8	3	100	35.33333333
11/22/2022	8	3	100	35.33333333
11/22/2022	8	3	100	35.33333333
11/22/2022	8	3	100	35.33333333
11/22/2022	8	3	100	35.33333333
11/22/2022	19	3	100	35.33333333
11/22/2022	19	3	100	35.33333333
11/22/2022	19	3	100	35.33333333
11/22/2022	31	3	100	35.33333333
11/22/2022	31	3	100	35.33333333
11/22/2022	31	3	100	35.33333333
11/22/2022	31	3	100	35.33333333
11/22/2022	31	3	72.264	26.088
11/22/2022	31	3	100	35.33333333
11/22/2022	31	3	100	35.33333333
11/22/2022	31	3	100	35.33333333
11/22/2022	43	3	100	35.33333333
11/22/2022	43	3	100	35.33333333
11/22/2022	43	3	100	35.33333333
11/22/2022	43	3	100	35.33333333
11/22/2022	43	3	100	35.33333333
11/22/2022	43	3	52.904	19.63466667
11/22/2022	43	3	100	35.33333333
11/22/2022	43	3	100	35.33333333
