# Supplementary material for: RT-LAMP as Diagnostic Tool for Influenza—A Virus Detection in Swine
Source: Vet Sci. 2023 Mar 13;10(3):220. doi: 10.3390/vetsci10030220 (PMC10051247; doi:10.3390/vetsci10030220)
Supplement: Supplementary file 1 [file vetsci-10-00220-s001.zip › ROC_data.xlsx]

## Sheet: Sheet1
Date	Sample name	Positive sample minutes	Paired PCR CT	P or N	Binary
		Minutes	Cq
				Positive Negative
	2	14.5	21.22	Positive	1
	6	35	40	Negative	0
	7	16.15	24.42	Positive	1
	9	15.49	27.49	Positive	1
	12	21.2	22.17	Positive	1
	14	17.53	40	Negative	0
	19	17.54	24.09	Positive	1
	22	17.13	14.93	Positive	1
	23	15.43	37.93	Positive	1
	24	15.64	24.66	Positive	1
	27	16.57	24.22	Positive	1
	29	16.7	21.7	Positive	1
	30	17.32	21.45	Positive	1
	33	15.94	20.87	Positive	1
	34	16.02	33.22	Positive	1
	37	17.44	26.28	Positive	1
	39	23.22	21.78	Positive	1
	2	11.9475	33.987	Positive	1
	3	13.5434	33.414	Positive	1
	4	13.2768	17.844	Positive	1
	5	11.3499	23.349	Positive	1
	6	13.6457	26.493	Positive	1
	7	12.8036	19.348	Positive	1
	8	13.2623	21.086	Positive	1
	9	13.3392	26.48	Positive	1
	10	11.823	19.825	Positive	1
	11	13.1987	19.674	Positive	1
	12	11.3912	20.403	Positive	1
	13	14.25	20.931	Positive	1
	14	14.0866	21.36	Positive	1
	15	12.7802	17.706	Positive	1
	17	18.1034	21.598	Positive	1
	18	14.8738	22.357	Positive	1
	19	14.02	19.882	Positive	1
	20	13.7261	22.544	Positive	1
	8	16.701	36.96	Positive	1
	9	18.7291	36.109	Positive	1
	12	16.8534	33.248	Positive	1
	13	17.3611	27.746	Positive	1
	29	17.5221	21.953	Positive	1
	30	18.6702	27.327	Positive	1
	31	17.5561	31.8367	Positive	1
	41	18.2565	18.121	Positive	1
	42	15.9409	18.161	Positive	1
	41	16.499	18.12	Positive	1
	42	17.7267	18.16	Positive	1
	1	20.8473	17.483	Positive	1
	2	12.1653	15.681	Positive	1
	3	18.3831	24.382	Positive	1
	4	14.9073	21.593	Positive	1
	5	11.3103	15.419	Positive	1
	6	13.9839	26.803	Positive	1
	7	11.4098	15.597	Positive	1
	8	12.8365	15.902	Positive	1
	9	12.9391	17	Positive	1
	6	27	40	Negative	0
	8	35.3333	40	Negative	0
	8	35.3333	40	Negative	0
	8	35.3333	40	Negative	0
	8	35.3333	40	Negative	0
	20	35.3333	40	Negative	0
	20	35.3333	40	Negative	0
	20	14.861	40	Negative	0
	20	35.3333	40	Negative	0
	21	35.3333	40	Negative	0
	21	35.3333	40	Negative	0
	21	35.3333	40	Negative	0
	21	35.3333	40	Negative	0
	32	35.2926	40	Negative	0
	32	31.1432	40	Negative	0
	32	31.2937	40	Negative	0
	32	35.3333	40	Negative	0
	33	35.3333	40	Negative	0
	33	35.3333	40	Negative	0
	33	35.3333	40	Negative	0
	33	19.0457	40	Negative	0
	33	28.2631	40	Negative	0
	33	35.3333	40	Negative	0
	33	35.3333	40	Negative	0
	33	16.033	40	Negative	0
	33	16.9441	40	Negative	0
	44	33.3825	40	Negative	0
	44	33.1864	40	Negative	0
	44	35.3333	40	Negative	0
	44	27.3224	40	Negative	0
	45	16.7688	40	Negative	0
	45	35.3333	40	Negative	0
	45	33.6386	40	Negative	0
	45	35.3333	40	Negative	0
	55	32.4361	40	Negative	0
	55	34.7531	40	Negative	0
	55	35.3333	40	Negative	0
	55	35.3333	40	Negative	0
	57	35.3333	40	Negative	0
	57	35.3333	40	Negative	0
	57	35.3333	40	Negative	0
	57	35.3333	40	Negative	0
	57	35.3333	40	Negative	0
	57	35.3333	40	Negative	0
	57	35.3333	40	Negative	0
	57	35.3333	40	Negative	0
	57	35.3333	40	Negative	0
	18	35.6667	40	Negative	0
	18	35.6667	40	Negative	0
	18	35.6667	40	Negative	0
	18	26.3185	40	Negative	0
	18	35.6667	40	Negative	0
	18	35.3333	40	Negative	0
	18	35.3333	40	Negative	0
	18	24.5989	40	Negative	0
	18	35.3333	40	Negative	0
	19	31.1176	40	Negative	0
	19	35.3333	40	Negative	0
	19	22.4296	40	Negative	0
	19	23.678	40	Negative	0
	20	35.3333	40	Negative	0
	20	35.3333	40	Negative	0
	20	35.3333	40	Negative	0
	20	35.3333	40	Negative	0
	19	35.3333	40	Negative	0
	19	35.3333	40	Negative	0
	20	35.3333	40	Negative	0
	20	35.3333	40	Negative	0
	8	35.3333	40	Negative	0
	8	35.3333	40	Negative	0
	8	35.3333	40	Negative	0
	8	35.3333	40	Negative	0
	8	35.3333	40	Negative	0
	8	35.3333	40	Negative	0
	8	35.3333	40	Negative	0
	8	35.3333	40	Negative	0
	19	35.3333	40	Negative	0
	19	35.3333	40	Negative	0
	19	35.3333	40	Negative	0
	31	35.3333	40	Negative	0
	31	35.3333	40	Negative	0
	31	35.3333	40	Negative	0
	31	35.3333	40	Negative	0
	31	26.088	40	Negative	0
	31	35.3333	40	Negative	0
	31	35.3333	40	Negative	0
	31	35.3333	40	Negative	0
	43	35.3333	40	Negative	0
	43	35.3333	40	Negative	0
	43	35.3333	40	Negative	0
	43	35.3333	40	Negative	0
	43	35.3333	40	Negative	0
	43	19.6347	40	Negative	0
	43	35.3333	40	Negative	0
	43	35.3333	40	Negative	0

## Sheet: ROCValues1
Positive sample minutes	Positive sample minutes	Positive sample minutes	Optimal Cutpoint	Optimal Cutpoint
Cut off	1 - Specificity False Positive Rate	Sensitivity True Positive Rate
10.3103	0	0	0.0515464	0.943396
11.3301	0	0.0188679
11.3705	0	0.0377358
11.4005	0	0.0566038
11.6164	0	0.0754717
11.8852	0	0.0943396
12.0564	0	0.113208
12.4727	0	0.132075
12.7919	0	0.150943
12.82	0	0.169811
12.8878	0	0.188679
13.0689	0	0.207547
13.2305	0	0.226415
13.2695	0	0.245283
13.308	0	0.264151
13.4413	0	0.283019
13.5946	0	0.301887
13.6859	0	0.320755
13.855	0	0.339623
14.0019	0	0.358491
14.0533	0	0.377358
14.1683	0	0.396226
14.375	0	0.415094
14.6805	0	0.433962
14.8674	0.0103093	0.433962
14.8906	0.0103093	0.45283
15.1687	0.0103093	0.471698
15.46	0.0103093	0.490566
15.565	0.0103093	0.509434
15.79	0.0103093	0.528302
15.9404	0.0103093	0.54717
15.9804	0.0103093	0.566038
16.0265	0.0103093	0.584906
16.0915	0.0206186	0.584906
16.3245	0.0206186	0.603774
16.5345	0.0206186	0.622642
16.635	0.0206186	0.641509
16.7005	0.0206186	0.660377
16.7349	0.0206186	0.679245
16.8111	0.0309278	0.679245
16.8988	0.0309278	0.698113
17.0371	0.0412371	0.698113
17.225	0.0412371	0.716981
17.3405	0.0412371	0.735849
17.4005	0.0412371	0.754717
17.4811	0.0412371	0.773585
17.5261	0.0412371	0.792453
17.535	0.0515464	0.792453
17.5481	0.0515464	0.811321
17.6414	0.0515464	0.830189
17.9151	0.0515464	0.849057
18.18	0.0515464	0.867925
18.3198	0.0515464	0.886792
18.5266	0.0515464	0.90566
18.6996	0.0515464	0.924528
18.8874	0.0515464	0.943396
19.3402	0.0618557	0.943396
20.241	0.0721649	0.943396
21.0237	0.0721649	0.962264
21.8148	0.0721649	0.981132
22.8248	0.0824742	0.981132
23.449	0.0824742	1
24.1385	0.0927835	1
25.3434	0.103093	1
26.2033	0.113402	1
26.6593	0.123711	1
27.1612	0.134021	1
27.7927	0.14433	1
29.6903	0.154639	1
31.1304	0.164948	1
31.2185	0.175258	1
31.8649	0.185567	1
32.8112	0.195876	1
33.2844	0.206186	1
33.5106	0.216495	1
34.1959	0.226804	1
34.8765	0.237113	1
35.1463	0.247423	1
35.313	0.257732	1
35.5	0.958763	1
36.6667	1	1

## Sheet: Sheet2
Date	Sample name	Pos samp CT	Positive sample minutes	Paired PCR CT	P or N	P or N	Molecule #
		Cq	Minutes
					Positive Negative
	1	4.288	3.42933		Positive	1
	1	4.233	3.411		Positive	1
	1	4.151	3.38367		Positive	1
	2	10.428	5.476		Positive	1
	2	10.274	5.42467		Positive	1
	2	10.639	5.54633		Positive	1
	3	22.745	9.58167		Positive	1
	3	22.656	9.552		Positive	1
	3	22.027	9.34233		Positive	1
	4	29.363	11.7877		Positive	1
	4	28.175	11.3917		Positive	1
	4	29.04	11.68		Positive	1
	5	35.064	13.688		Positive	1
	5	58.944	21.648		Positive	1
	5	33.995	13.3317		Positive	1
	6	58.462	21.4873		Positive	1
	6	39.385	15.1283		Positive	1
	6	39.607	15.2023		Positive	1
	7	44.523	16.841		Positive	1
	7	62.966	22.9887		Positive	1
	7	46.733	17.5777		Positive	1
	8	50.129	18.7097		Positive	1
	8	70.249	25.4163		Positive	1
	8	51.456	19.152		Positive	1
	NTC	61.834	22.6113		Negative	0
	NTC	62.451	22.817		Negative	0
	NTC	73.996	26.6653		Negative	0
	1	3.965	3.32167		Positive	1	951498357
	1	4.061	3.35367		Positive	1	951498357
	2	14.239	6.74633		Positive	1	95100000
	2	14.317	6.77233		Positive	1	95100000
	2	14.701	6.90033		Positive	1	95100000
	3	26.169	10.723		Positive	1	9510000
	3	26.568	10.856		Positive	1	9510000
	3	30.237	12.079		Positive	1	9510000
	4	33.966	13.322		Positive	1	951000
	4	34.337	13.4457		Positive	1	951000
	4	35.162	13.7207		Positive	1	951000
	5	38.392	14.7973		Positive	1	95100
	5	40.91	15.6367		Positive	1	95100
	5	41.159	15.7197		Positive	1	95100
	6	46.487	17.4957		Positive	1	9510
	6	47.336	17.7787		Positive	1	9510
	6	48.13	18.0433		Positive	1	9510
	7	53.514	19.838		Positive	1	951
	7	54.803	20.2677		Positive	1	951
	7	55.93	20.6433		Positive	1	951
	8	57.772	21.2573		Positive	1	95.1
	8	58.94	21.6467		Positive	1	95.1
	8	62.607	22.869		Positive	1	95.1
	NTC	68.402	24.8007		Negative	0	0.1
	NTC	69.579	25.193		Negative	0	0.1
	NTC	70.84	25.6133		Negative	0	0.1
	4	20.826	8.942		Positive	1	951000
	4	19.614	8.538		Positive	1	951000
	4	21.554	9.18467		Positive	1	951000
	4	22.947	9.649		Positive	1	951000
	5	25.665	10.555		Positive	1	95100
	5	28.237	11.4123		Positive	1	95100
	5	30.009	12.003		Positive	1	95100
	5	27.871	11.2903		Positive	1	95100
	6	35.76	13.92		Positive	1	9510
	6	31.922	12.6407		Positive	1	9510
	6	34.048	13.3493		Positive	1	9510
	6	34.708	13.5693		Positive	1	9510
	7	37.723	14.5743		Positive	1	951
	7	38.553	14.851		Positive	1	951
	7	39.991	15.3303		Positive	1	951
	7	41.023	15.6743		Positive	1	951
	8	41.648	15.8827		Positive	1	95.1
	8	46.252	17.4173		Positive	1	95.1
	8	45.218	17.0727		Positive	1	95.1
	8	44.589	16.863		Positive	1	95.1
	NTC	48.809	18.2697		Positive	1
	4	21.534	9.178		Positive	1	951000
	4	22.006	9.33533		Positive	1	951000
	5	26.994	10.998		Positive	1	95100
	5	27.64	11.2133		Positive	1	95100
	6	32.701	12.9003		Positive	1	9510
	6	32.845	12.9483		Positive	1	9510
	7	37.489	14.4963		Positive	1	951
	7	37.5	14.5		Positive	1	951
	8	42.393	16.131		Positive	1	95.1
	8	43.208	16.4027		Positive	1	95.1
	NTC	44.97	16.99		Negative	0
	NTC	46.591	17.5303		Negative	0
	Poscon	6.73	4.24333		Negative	0
	NTC	51.833	19.2777		Negative	0
	Pos	40.051	15.3503		Positive	1
	NTC	36.464	14.1547	33.637	Negative	0
	NTC	69.378	25.126	31.373	Negative	0
	NTC	43.8806	16.6269		Negative	0
	NTC	67.8667	24.6222		Negative	0
	NTC	53.9643	19.9881		Negative	0
	NTC	54.2156	20.0719		Negative	0
	NTC	75	27		Negative	0
	NTC	58.4829	21.4943		Negative	0
	NTC	67.6841	24.5614		Negative	0
	NTC	75	27		Negative	0
	HPLC m1	12.619	6.20633		Positive	1
	HPLC m2	15.815	7.27167		Positive	1
	HPLC m3	18.161	8.05367		Positive	1
	HPLC m4	20.183	8.72767		Positive	1
	HPLC m5	22.083	9.361		Positive	1
	HPLC m6	23.442	9.814		Positive	1
	HPLC NTC	100	35.3333		Negative	0
	HPLC NTC	100	35.3333		Negative	0
	HPLC NTC	100	35.3333		Negative	0
	HPLC NTC	100	35.3333		Negative	0
	HPLC NTC	100	35.3333		Negative	0
	HPLC NTC	100	35.3333		Negative	0
	LAT m1	20.069	8.68967		Positive	1
	LAT m2	23.559	9.853		Positive	1
	LAT m3	25.981	10.6603		Positive	1
	LAT m4	28.512	11.504		Positive	1
	LAT m5	30.366	12.122		Positive	1
	LAT m6	32.344	12.7813		Positive	1
	LAT NTC	100	35.3333		Negative	0
	LAT NTC	100	35.3333		Negative	0
	LAT NTC	100	35.3333		Negative	0
	LAT NTC	100	35.3333		Negative	0
	LAT NTC	100	35.3333		Negative	0
	LAT NTC	100	35.3333		Negative	0
	NTC	100	35.3333		Negative	0	0.1
	NTC	100	35.3333		Negative	0	0.1
	NTC	100	35.3333		Negative	0	0.1
	NTC	100	35.3333		Negative	0	0.1
	NTC	100	35.3333		Negative	0	0.1
	NTC	100	35.3333		Negative	0	0.1
	NTC	100	35.3333		Negative	0	0.1
	NTC	100	35.3333		Negative	0	0.1
	NTC	100	35.3333		Negative	0	0.1
	NTC	100	35.3333		Negative	0	0.1
	NTC	100	35.3333		Negative	0	0.1
	NTC	100	35.3333		Negative	0	0.1
	NTC	100	35.3333		Negative	0	0.1
	NTC	100	35.3333		Negative	0	0.1
	NTC	100	35.3333		Negative	0	0.1
	NTC	100	35.3333		Negative	0	0.1
	NTC	100	35.3333		Negative	0	0.1
	NTC	100	35.3333		Negative	0	0.1
	NTC	100	35.3333		Negative	0	0.1
	NTC	100	35.3333		Negative	0	0.1
	NTC	100	35.3333		Negative	0	0.1
	NTC	100	35.3333		Negative	0	0.1
	NTC	100	35.3333		Negative	0	0.1
	NTC	100	35.3333		Negative	0	0.1
	NTC	100	35.3333		Negative	0	0.1
	NTC	100	35.3333		Negative	0	0.1
	NTC	100	35.3333		Negative	0	0.1
	NTC	100	35.3333		Negative	0	0.1
	NTC	100	35.3333		Negative	0	0.1
	NTC	100	35.3333		Negative	0	0.1
	NTC	100	35.3333		Negative	0	0.1
	NTC	100	35.3333		Negative	0	0.1
	NTC	100	35.3333		Negative	0	0.1
	NTC	100	35.3333		Negative	0	0.1
	NTC	100	35.3333		Negative	0	0.1
	NTC	100	35.3333		Negative	0	0.1
	NTC	100	35.3333		Negative	0	0.1
	NTC	100	35.3333		Negative	0	0.1
	NTC	100	35.3333		Negative	0	0.1
	NTC	100	35.3333		Negative	0	0.1
	NTC	100	35.3333		Negative	0	0.1
	NTC	100	35.3333		Negative	0	0.1
	NTC	100	35.3333		Negative	0	0.1
	NTC	100	35.3333		Negative	0	0.1
	NTC	100	35.3333		Negative	0	0.1
	NTC	100	35.3333		Negative	0	0.1
	NTC	100	35.3333		Negative	0	0.1
	NTC	100	35.3333		Negative	0	0.1
	NTC	100	35.3333		Negative	0	0.1
	NTC	100	35.3333		Negative	0	0.1
	NTC	100	35.3333		Negative	0	0.1
	NTC	100	35.3333		Negative	0	0.1
	NTC	100	35.3333		Negative	0	0.1
	NTC	100	35.3333		Negative	0	0.1
	NTC	100	35.3333		Negative	0	0.1
	NTC	100	35.3333		Negative	0	0.1
	NTC	100	35.3333		Negative	0	0.1
	NTC	68.879	24.9597		Negative	0	0.1
	NTC	100	35.3333		Negative	0	0.1
	PosCon	11.8999	5.96665		Positive	1
	PosCon	10.8078	5.6026		Positive	1
	M 1	20.2595	8.75317		Positive	1
	M 1	22.3877	9.46257		Positive	1
	M.5	24.5949	10.1983		Positive	1
	M.5	25.5724	10.5241		Positive	1
	NTC	74.9544	26.9848		Negative	0
	NTC	100	35.3333		Negative	0
	NTC	74.5688	26.8563		Negative	0
	NTC	57.8207	21.2736		Negative	0
	PosCon	14.7483	6.91611		Positive	1
	PosCon	15.7053	7.2351		Positive	1
	2	51.4041	19.1347		Positive	1	88
	2	45.2719	17.0906		Positive	1	88
	2	54.0245	20.0082		Positive	1	88
	2	53.6086	19.8695		Positive	1	88
	3	54.5803	20.1934		Positive	1	880
	3	72.9715	26.3238		Positive	1	880
	3	71.6385	25.8795		Positive	1	880
	4	31.8538	12.6179		Positive	1	8800
	4	32.8094	12.9365		Positive	1	8800
	4	28.2508	11.4169		Positive	1	8800
	4	28.1733	11.3911		Positive	1	8800
	5	25.6167	10.5389		Positive	1	88000
	5	31.6216	12.5405		Positive	1	88000
	5	26.238	10.746		Positive	1	88000
	5	23.7358	9.91195		Positive	1	88000
	6	21.6923	9.23078		Positive	1	880000
	6	21.6816	9.22722		Positive	1	880000
	6	19.877	8.62565		Positive	1	880000
	6	18.9479	8.31596		Positive	1	880000
	NTC	100	35.3333		Negative	0	0.1
	NTC	100	35.3333		Negative	0	0.1
	NTC	100	35.3333		Negative	0	0.1
	NTC	51.5296	19.1765		Negative	0	0.1
	NTC	100	35.3333		Negative	0	0.1
	NTC	100	35.3333		Negative	0	0.1
	NTC	100	35.3333		Negative	0	0.1
	NTC	70.6435	25.5478		Negative	0	0.1
	NTC	100	35.3333		Negative	0	0.1
	NTC	100	35.3333		Negative	0	0.1
	NTC	53.1795	19.7265		Negative	0	0.1
	NTC	100	35.3333		Negative	0	0.1
	NTC	100	35.3333		Negative	0	0.1
	PosCon	21.2403	9.08011		Positive	1
	PosCon	21.0959	9.03197		Positive	1
	NTC	100	35.3333		Negative	0	0.1
	NTC	100	35.3333		Negative	0	0.1
	NTC	100	35.3333		Negative	0	0.1
	NTC	100	35.3333		Negative	0	0.1
	NTC	100	35.3333		Negative	0	0.1
	NTC	100	35.3333		Negative	0	0.1
	NTC	100	35.3333		Negative	0	0.1
	NTC	100	35.3333		Negative	0	0.1
	NTC	100	35.3333		Negative	0	0.1
	NTC	100	35.3333		Negative	0	0.1
	NTC	100	35.3333		Negative	0	0.1
	NTC	100	35.3333		Negative	0	0.1
		100	35.3333		Positive	1	88
		83.2168	29.7389		Positive	1	88
	2	78.6942	28.2314		Positive	1	88
	2	62.0728	22.6909		Positive	1	88
		93.0301	33.01		Positive	1	880
	4	59.6993	21.8998		Positive	1	8800
	4	58.2578	21.4193		Positive	1	8800
	4	40.4087	15.4696		Positive	1	8800
	4	39.8879	15.296		Positive	1	8800
	5	48.9233	18.3078		Positive	1	88000
	5	48.1181	18.0394		Positive	1	88000
	5	33.5707	13.1902		Positive	1	88000
	5	34.9774	13.6591		Positive	1	88000
	6	40.6284	15.5428		Positive	1	880000
	6	41.9785	15.9928		Positive	1	880000
	6	27.7979	11.266		Positive	1	880000
	6	27.6507	11.2169		Positive	1	880000
	NTC	100	35.3333		Negative	0
	NTC	100	35.3333		Negative	0
	NTC	100	35.3333		Negative	0
	NTC	100	35.3333		Negative	0
	NTC	100	35.3333		Negative	0
	NTC	100	35.3333		Negative	0
	POS CON	26.513	10.8377		Positive	1
	9	54.371	20.1237		Positive	1
	9	70.475	25.4917		Positive	1
	9	56.727	20.909		Positive	1
	10	56.679	20.893		Positive	1
	10	57.373	21.1243		Positive	1
	10	65.867	23.9557		Positive	1
	9	61.207	22.4023		Removed	1	9.51
	9	61.958	22.6527		Removed	1	9.51
	9	62.907	22.969		Removed	1	9.51
	10	70.1	25.3667		Removed	1	0.951
	10	71.352	25.784		Removed	1	0.951
	10	75	27		Removed	1	0.951
	9c	44.657	16.8857		Removed	1	9.51
	9	45.164	17.0547		Removed	1	9.51
	9	46.033	17.3443		Removed	1	9.51
	1 1	71.2687	25.7562		Removed	1	8
	1 1	63.482	23.1607		Removed	1	8
	1 0.5	60.2522	22.0841		Removed	1	8
	1 0.5	100	35.3333		Removed	1	0.1

## Sheet: ROCValues2
Positive sample minutes	Positive sample minutes	Positive sample minutes	Optimal Cutpoint	Optimal Cutpoint	Reference Line	Reference Line
Cut off	1 - Specificity False Positive Rate	Sensitivity True Positive Rate
2.32167	0	0	0.0952381	0.908451	0	0
3.33767	0	0.00704225			0.5	0.5
3.36867	0	0.0140845			1	1
3.39733	0	0.0211268
3.42017	0	0.028169
3.83633	0	0.0352113
4.834	0.00793651	0.0352113
5.45033	0.00793651	0.0422535
5.51117	0.00793651	0.0492958
5.57447	0.00793651	0.056338
5.78462	0.00793651	0.0633803
6.08649	0.00793651	0.0704225
6.47633	0.00793651	0.0774648
6.75933	0.00793651	0.084507
6.83633	0.00793651	0.0915493
6.90822	0.00793651	0.0985915
7.0756	0.00793651	0.105634
7.25338	0.00793651	0.112676
7.66267	0.00793651	0.119718
8.18482	0.00793651	0.126761
8.42698	0.00793651	0.133803
8.58183	0.00793651	0.140845
8.65766	0.00793651	0.147887
8.70867	0.00793651	0.15493
8.74042	0.00793651	0.161972
8.84759	0.00793651	0.169014
8.98699	0.00793651	0.176056
9.05604	0.00793651	0.183099
9.12906	0.00793651	0.190141
9.18133	0.00793651	0.197183
9.20594	0.00793651	0.204225
9.229	0.00793651	0.211268
9.28306	0.00793651	0.21831
9.33883	0.00793651	0.225352
9.35167	0.00793651	0.232394
9.41178	0.00793651	0.239437
9.50728	0.00793651	0.246479
9.56683	0.00793651	0.253521
9.61533	0.00793651	0.260563
9.7315	0.00793651	0.267606
9.8335	0.00793651	0.274648
9.88247	0.00793651	0.28169
10.0551	0.00793651	0.288732
10.3612	0.00793651	0.295775
10.5315	0.00793651	0.302817
10.547	0.00793651	0.309859
10.6077	0.00793651	0.316901
10.6917	0.00793651	0.323944
10.7345	0.00793651	0.330986
10.7918	0.00793651	0.338028
10.8468	0.00793651	0.34507
10.927	0.00793651	0.352113
11.1057	0.00793651	0.359155
11.2151	0.00793651	0.366197
11.2414	0.00793651	0.373239
11.2782	0.00793651	0.380282
11.3407	0.00793651	0.387324
11.3914	0.00793651	0.394366
11.402	0.00793651	0.401408
11.4146	0.00793651	0.408451
11.4605	0.00793651	0.415493
11.592	0.00793651	0.422535
11.7338	0.00793651	0.429577
11.8953	0.00793651	0.43662
12.041	0.00793651	0.443662
12.1005	0.00793651	0.450704
12.3313	0.00793651	0.457746
12.5792	0.00793651	0.464789
12.6293	0.00793651	0.471831
12.711	0.00793651	0.478873
12.8408	0.00793651	0.485915
12.9184	0.00793651	0.492958
12.9424	0.00793651	0.5
13.0693	0.00793651	0.507042
13.2561	0.00793651	0.514085
13.3268	0.00793651	0.521127
13.3405	0.00793651	0.528169
13.3975	0.00793651	0.535211
13.5075	0.00793651	0.542254
13.6142	0.00793651	0.549296
13.6736	0.00793651	0.556338
13.7043	0.00793651	0.56338
13.8203	0.00793651	0.570423
14.0373	0.00793651	0.577465
14.3255	0.015873	0.577465
14.4982	0.015873	0.584507
14.5372	0.015873	0.591549
14.6858	0.015873	0.598592
14.8242	0.015873	0.605634
14.9897	0.015873	0.612676
15.1653	0.015873	0.619718
15.2492	0.015873	0.626761
15.3132	0.015873	0.633803
15.3403	0.015873	0.640845
15.4099	0.015873	0.647887
15.5062	0.015873	0.65493
15.5897	0.015873	0.661972
15.6555	0.015873	0.669014
15.697	0.015873	0.676056
15.8012	0.015873	0.683099
15.9377	0.015873	0.690141
16.0619	0.015873	0.697183
16.2668	0.015873	0.704225
16.5148	0.015873	0.711268
16.7339	0.0238095	0.711268
16.852	0.0238095	0.71831
16.9265	0.0238095	0.725352
17.0313	0.031746	0.725352
17.0816	0.031746	0.732394
17.254	0.031746	0.739437
17.4565	0.031746	0.746479
17.513	0.031746	0.753521
17.554	0.0396825	0.753521
17.6782	0.0396825	0.760563
17.909	0.0396825	0.767606
18.0413	0.0396825	0.774648
18.1565	0.0396825	0.78169
18.2887	0.0396825	0.788732
18.5087	0.0396825	0.795775
18.9222	0.0396825	0.802817
19.1434	0.0396825	0.809859
19.1643	0.0396825	0.816901
19.2271	0.047619	0.816901
19.5021	0.0555556	0.816901
19.7823	0.0634921	0.816901
19.8538	0.0634921	0.823944
19.9288	0.0634921	0.830986
19.9981	0.0714286	0.830986
20.04	0.0714286	0.838028
20.0978	0.0793651	0.838028
20.1586	0.0793651	0.84507
20.2306	0.0793651	0.852113
20.4555	0.0793651	0.859155
20.7682	0.0793651	0.866197
20.901	0.0793651	0.873239
21.0167	0.0793651	0.880282
21.1908	0.0793651	0.887324
21.2654	0.0793651	0.894366
21.3464	0.0873016	0.894366
21.4533	0.0873016	0.901408
21.4908	0.0873016	0.908451
21.5705	0.0952381	0.908451
21.6473	0.0952381	0.915493
21.7739	0.0952381	0.922535
22.2555	0.0952381	0.929577
22.6511	0.103175	0.929577
22.754	0.103175	0.93662
22.843	0.111111	0.93662
22.9288	0.111111	0.943662
23.4722	0.111111	0.950704
24.2585	0.111111	0.957746
24.5918	0.119048	0.957746
24.7115	0.126984	0.957746
24.8802	0.134921	0.957746
25.0428	0.142857	0.957746
25.1595	0.150794	0.957746
25.3047	0.15873	0.957746
25.454	0.15873	0.964789
25.5197	0.15873	0.971831
25.5806	0.166667	0.971831
25.7464	0.174603	0.971831
26.1017	0.174603	0.978873
26.4946	0.174603	0.985915
26.7608	0.18254	0.985915
26.9205	0.190476	0.985915
26.9924	0.198413	0.985915
27.6157	0.214286	0.985915
28.9852	0.214286	0.992958
32.5361	0.214286	1
36.3333	1	1
